# Supplementary material for: Generation of ionic liquid tolerant Pseudomonas putida KT2440 strains via adaptive laboratory evolution
Source: Royal Society of Chemistry journal article supplement (doi:10.1039/d0gc01663b), 2020-01-01
Supplement: d0gc01663b1.pdf [file d0gc01663b1.pdf]

**Electronic Supplementary Information of**  
**Generation of Ionic Liquid Tolerant *Pseudomonas putida* KT2440 Strains via**  
**Adaptive Laboratory Evolution**

Hyun Gyu Lim<sup>a,b</sup>, Bonnie Fong<sup>b,g</sup>, Geovanni Alarcon<sup>a</sup>, Harsha D. Magurudeniya<sup>b,f</sup>, Thomas Eng<sup>b,g</sup>, Richard Szubin<sup>a</sup>, Connor A. Olson<sup>a</sup>, Bernhard O. Palsson<sup>a,b,c,d</sup>, John M. Gladden<sup>b,e,f</sup>, Blake A. Simmons<sup>b,g</sup>, Aindrila Mukhopadhyay<sup>b,g,h</sup>, Steven W. Singer<sup>b,g</sup>, Adam M. Feist<sup>a,b,c,\*</sup>

<sup>a</sup>Department of Bioengineering, University of California San Diego, 9500 Gilman Dr., La Jolla, CA 92093, USA

<sup>b</sup>Joint BioEnergy Institute, 5885 Hollis street, 4th floor, Emeryville, CA 94608, USA

<sup>c</sup>Novo Nordisk Foundation Center for Biosustainability, Technical University of Denmark, 2800 Kgs, Lyngby, Denmark

<sup>d</sup>Department of Pediatrics, University of California, San Diego, CA 92093, USA

<sup>e</sup>Department of Energy, Agile BioFoundry, Emeryville, CA 94608, USA.

<sup>f</sup>Department of Biomass Science and Conversion Technology, Sandia National Laboratories, 7011 East Ave, Livermore, CA 94550, USA

<sup>g</sup>Biological Systems and Engineering Division, Lawrence Berkeley National Laboratory, 1 Cyclotron Road, Berkeley, CA 94702, USA

<sup>h</sup>Environmental Genomics and Systems Biology Division, Lawrence Berkeley National Laboratory, 1 Cyclotron Road, Berkeley, CA 94702, USA

\*To whom correspondence should be addressed.

(Adam M. Feist)

[afeist@ucsd.edu](mailto:afeist@ucsd.edu)

### **Supplementary Text 1. Speculations for impacts of mutations in the condition-specific ‘key-3’ regions**

Various mutations on *relA* (PP\_1656 encoding ATP:GTP 3'-pyrophosphotransferase) gene were detected in all 16 lineages regardless of the experimental conditions, indicating that this gene is critical for the adaptation to the medium (Fig. 3 and Table 1). Even though mutation patterns were dynamically changing during the evolution, many mutations were loss-of-function mutations such as altered start codon, insertion of early stop codons, frameshift mutations (Fig. S7a). Given that *relA* is responsible for synthesizing (p)ppGpp (guanosine pentaphosphate or tetraphosphate) which is an alarmone inducing the stringent response in microorganisms when amino acid starvation occurs,<sup>1</sup> it was believed that reduction of the stress signal is beneficial for higher growth rates and biomass formation. Indeed, it was observed that the deletion of *relA* significantly increased the growth rate of *Salmonella Typhimurium*.<sup>2</sup> Interestingly, despite the high frequency observed in this study, mutations on *relA* were not observed in a previous KT2440 evolution study<sup>3</sup> which was conducted under a similar condition. We found that initial strains have different genotypes (including G203D of *relA*) even though those are known as the same KT2440 strain (Supplementary Data 1); this initial different genetic background might attribute to such difference.

*oprB-II* (PP\_1445 encoding a carbohydrate-selective porin) and the intergenic region with PP\_1446 (encoding TonB-dependent receptor) were also frequently mutated in seven different lineages across two different experimental conditions (control and [TEOH][OAc]). OprB-II is known to be related to the uptake of glucose<sup>4</sup> whereas the role of PP\_1446 has not been identified. Interestingly, two mutations in the gene are synonymous, which would maintain the activity of OprB-II, and located at the middle or end of the protein (at the 265<sup>th</sup> and 384<sup>th</sup>

amino acids of 444 total amino acids) (Fig. S7b). One interpretation of the adaptation mechanism is that the mutations increased the expression of *oprB*-II gene or downstream *gcd* gene (PP\_1444 encoding quinoprotein glucose dehydrogenase) that could lead to an improvement in glucose utilization by changing the activities of their promoter regions.

*fleQ* (PP\_4373 encoding a transcriptional regulator controlling the flagella synthesis) was also commonly mutated in the 4 lineages of the control experiment. In accordance with previous observations,<sup>3,5</sup> *fleQ* was inactivated in most evolved strains from the control experiment by the insertion of stop codons or frame-shift mutations (Fig. S7c). The inactivation probably is for avoiding unnecessary generation of the flagella under the well-mixed experimental condition.<sup>6,7</sup>

Mutation events in *tktA* (PP\_4965 encoding transketolase A) introduced several non-synonymous changes and an insertion of amino acids (Fig. S7d) in 3 lineages of the control experiment. TktA catalyzes the interconversion of glyceraldehyde-3-phosphate (G3P) and sedoheptulose-7-phosphate (S7P) into ribose-5-phosphate (R5P) and xylulose 5-phosphate (X5P). Although it is an important gene related to glucose metabolism, their effects on the activity of TktA are currently not clear, given that there are many peripheral pathways in KT2440.<sup>8</sup>

Mutations on *gacS* (PP\_1650 encoding a sensor protein) were observed in 7 lineages of the TALEs (Table S3 and Supplementary Data 2). However, this gene was classified as the medium-specific regions (Fig 3), given that mutations on *gacS* have been observed in other evolution studies<sup>3,7</sup> not related to the IL. It is known that GacS consists of a two-component system with GacA (also known as UvrY), controlling genes related to the biofilm formation; the deletion of *gacS* adversely affected the biofilm formation.<sup>9,10</sup> As many mutations are insertions of stop codons or frame-shift mutations (Fig. S7e), the cells have been evolved not to synthesize

unnecessary biofilm similar to the *fleQ* case. Indeed, it was shown that the deletion of *gacS* improves the growth rate of *Pseudomonas* sp. PCL1171.<sup>11</sup>

Similarly, *uvrY* (PP\_4099 encoding a BarA(GacS)-UvrY two-component system response regulator)-PP\_4100 (encoding a Cro-CI family transcriptional regulator) region was also classified as the medium-specific regions (Fig. 3), although its mutations were observed in three different TALE experiments regardless of the IL (Fig. S7f, Supplementary Data 2). On the contrary to *gacS* that mostly acquired the loss-of-function mutations, the mutations of UvrY are a duplication of 27-bp, a single amino acid change, a base pair change in its 5'-untranslated region. Currently, the reason is not clear, further studies would be informative to understand the effect of the mutations.

## Supplementary Text 2. Speculations for impacts of mutations in the IL-specific ‘key-3’ regions

Two different in-frame deletion mutations (42-bp and 69-bp) of *oprD* (PP\_1206) encoding outer membrane basic amino acid-specific porin were observed in the 4 lineages of the [TEA][HS] tolerization ALE (TALE9-12, Fig. S7g). However, only the 69-bp-deletion mutation was fixed in two end-point strains (Supplementary Data 2). It is reported that OprD facilitates uptake several antibiotics such as imipenem although it mainly imports basic amino acids.<sup>4,12</sup> Although it is not clear, OprD might be acted as a channel for the entering of [TEA][HS] and the cell achieved the tolerance by decreasing the size of OprD causing a loss of the import activity.

One identical synonymous mutation (G38G) in the PP\_5324 gene encoding a two-component system response regulator was observed (Fig. S7h) in three different lineages of the TALE experiments that used [TEOH][OAc]. Although this gene was classified as an IL-specific region because its mutation has not been observed in any other studies, this gene may be related to general stress response and the flagella synthesis; two previous studies reported that its gene expression was changed under an elevated pressure condition (i.e., high oxygen concentration condition)<sup>13</sup> or with the deletion of *fliA* (PP\_4341 encoding the RNA polymerase sigma 28 factor)<sup>14</sup> which is closely related to the flagella synthesis. The expression of PP\_5324 was co-regulated with *gacS*, *cheA* (encoding a chemotaxis histidine kinase), *cheZ* (encoding a protein phosphatase).<sup>15</sup>

## Supplementary Figures

**Fig. S1. Initial evaluation of ionic liquid (IL) toxicities to the wild-type *Pseudomonas putida***

**KT2440 (KT2440) strain**

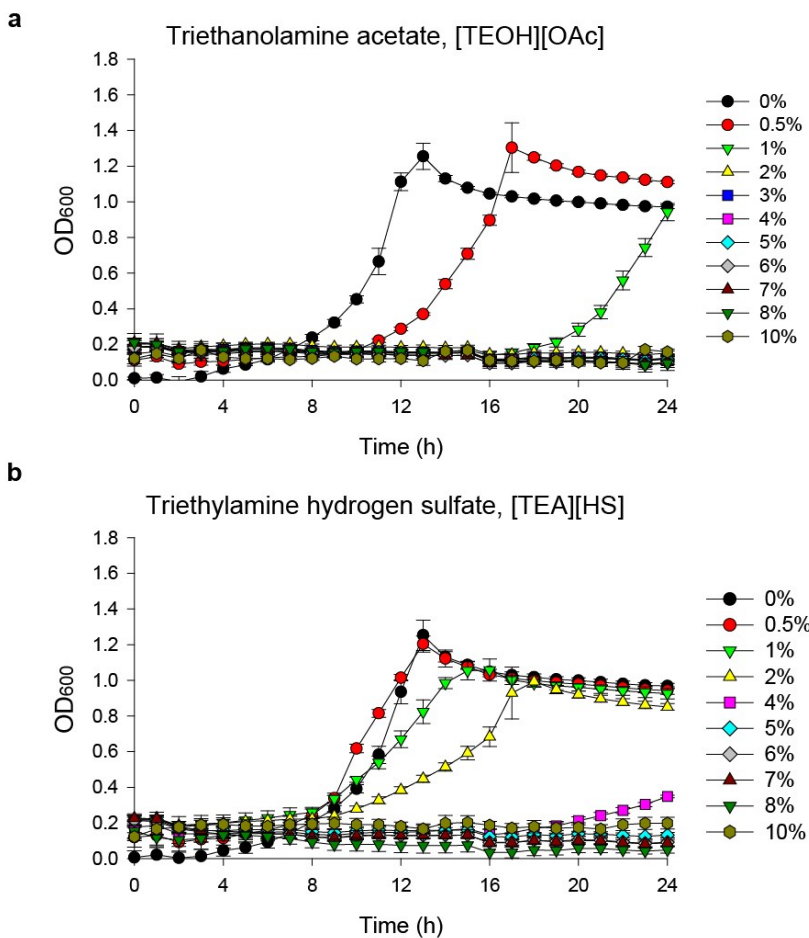

Growth profiles of KT2440 in the presence of various concentrations (% w/v) of (a) triethanolammonium acetate ([TEOH][OAc]), (b) triethylammonium hydrogen sulfate ([TEA][HS]) in 200  $\mu$ L of the medium. Error bars indicate the standard deviation of three independent cultures ( $n=3$ ). The  $x$ -axis and  $y$ -axis indicate time (h) and optical density at 600 nm ( $OD_{600}$ ), respectively.

**Fig. S2. Differentially expressed genes (DEGs) by the addition of ILs.**

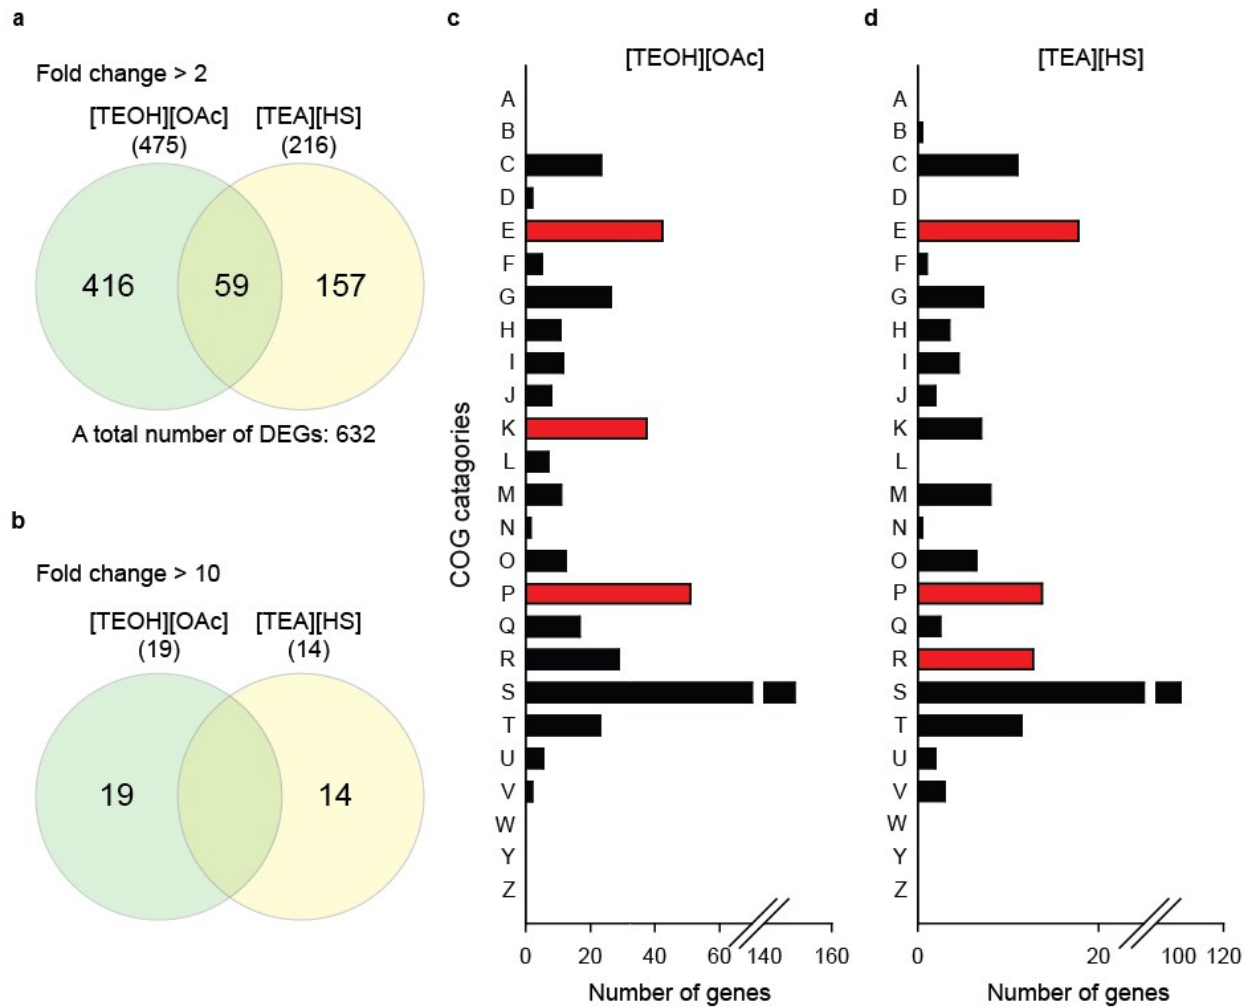

(a-b) Venn diagrams indicating numbers of DEGs upon the addition of [TEOH][OAc] and [TEA][HS]. Either 0.5% w/v [TEOH][OAc] or 2% w/v [TEA][HS] was added in the modified M9 medium. Fold changes are greater than (a) 2 or (b) 10. (c-d) Categorized DEGs (fold changes > 2) into clusters of orthologous groups (COGs) based on annotated functions. (c) [TEOH][OAc] and (d) [TEA][HS] were added. Red-colored bars indicated the top 3 groups in each condition except the category [S], unknown function. Other category symbols: A, RNA processing and modification; B, chromatin structure and dynamics; C, energy production and conversion; D, cell cycle control and mitosis; E, amino acid metabolism and transport; F, nucleotide metabolism and



transport; G, carbohydrate metabolism and transport; H, coenzyme metabolism; I, lipid metabolism; J, translation; K, transcription; L, replication and repair; M, cell wall/membrane/envelop biogenesis; N, cell motility; O, post-translational modification, protein turnover, chaperone functions; P, inorganic ion transport and metabolism; Q, secondary structure; R, general functional prediction only; T, signal transduction; U, intracellular trafficking, secretion, and vesicular transport; V, defense mechanism; W, extracellular structure; Y, nuclear structure; Z, cytoskeleton. All unannotated genes were manually assigned in the category [S].

**Fig. S3. Trajectories of the control ALE experiments without the stress**

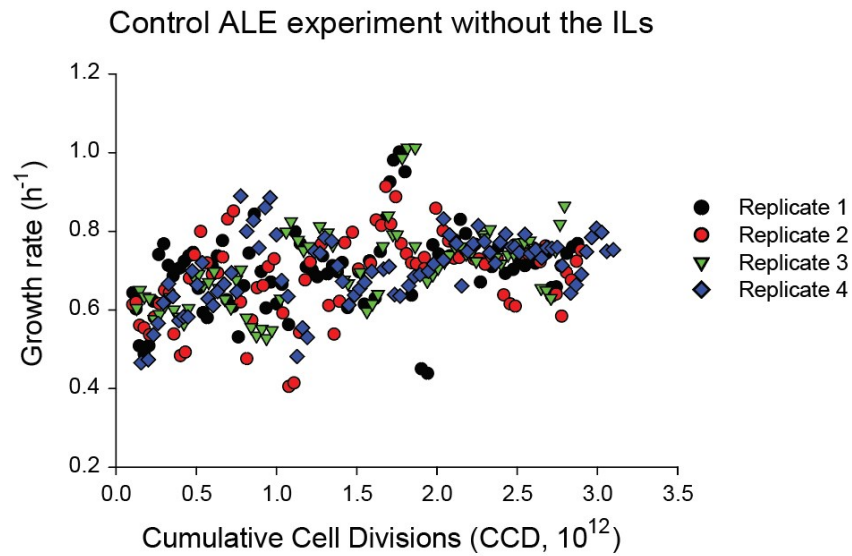

The control ALE experiment without the ILs was conducted with 4 biological replicates. The final average growth rate of 4 different lineages was 0.79 h<sup>-1</sup> while the initial average growth rate was 0.58 h<sup>-1</sup>. The left y-axis indicates the growth rate of each population. Each growth rate has been averaged with the values of 3 consecutive flasks (one before and after) because of fluctuation in growth rate measurement arisen from inappropriate sampling intervals, dust on wells of OD-measurement plates, etc.

**Fig. S4. Evaluation of IL tolerance of the end-point strains with different concentrations of [TEOH][OAc]**

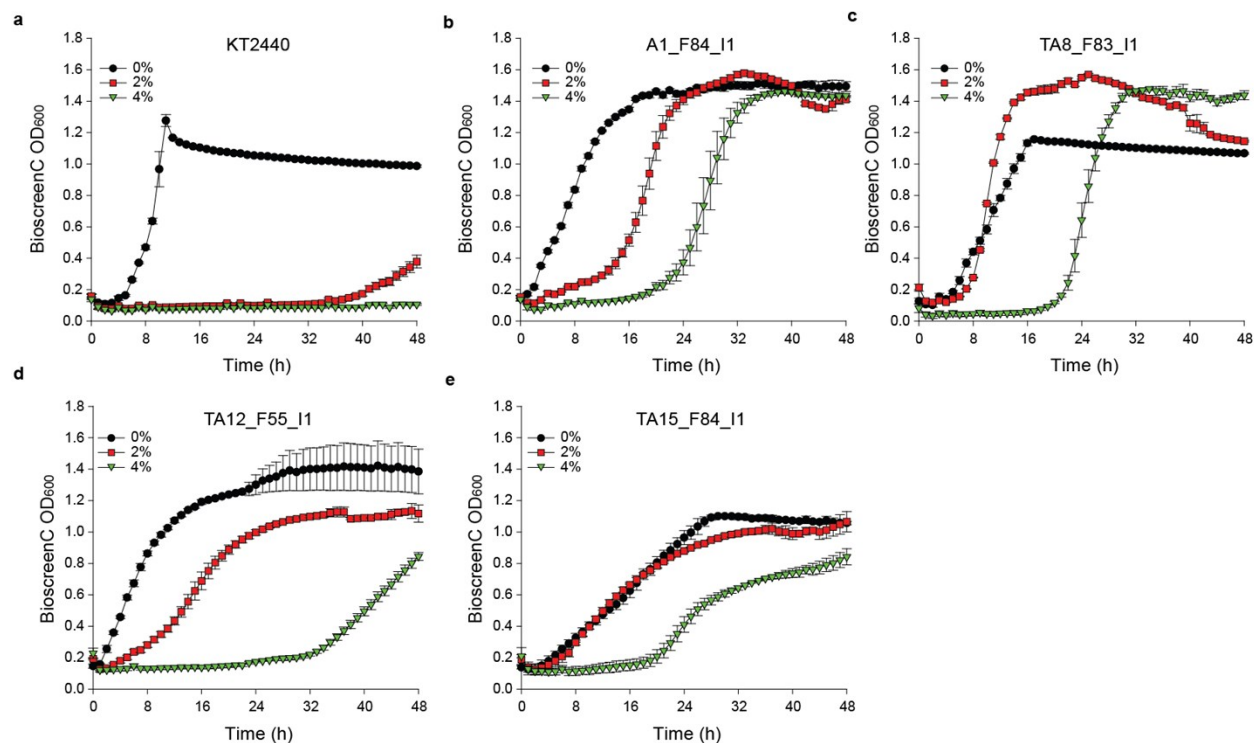

(a-e) Growth profiles of (a) the KT2440 and the best end-point strains (b-A1\_F84\_I1, c-TA8\_F83\_I1, d-TA12\_F55\_I1, e-TA15\_F84\_I1) showing highest growth rates with 4% [TEOH][OAc] from the same experimental conditions. The *x*-axis and *y*-axis indicate time (h) and optical density at 600 nm (OD<sub>600</sub>), respectively. Error bars indicate the standard deviation of three independent cultures ( $n=3$ ). Symbol: black circle, 0%; red square, 2%; green down triangle, 4%

**Fig. S5. Evaluation of IL tolerance of the end-point strains with different concentrations of [TEA][HS]**

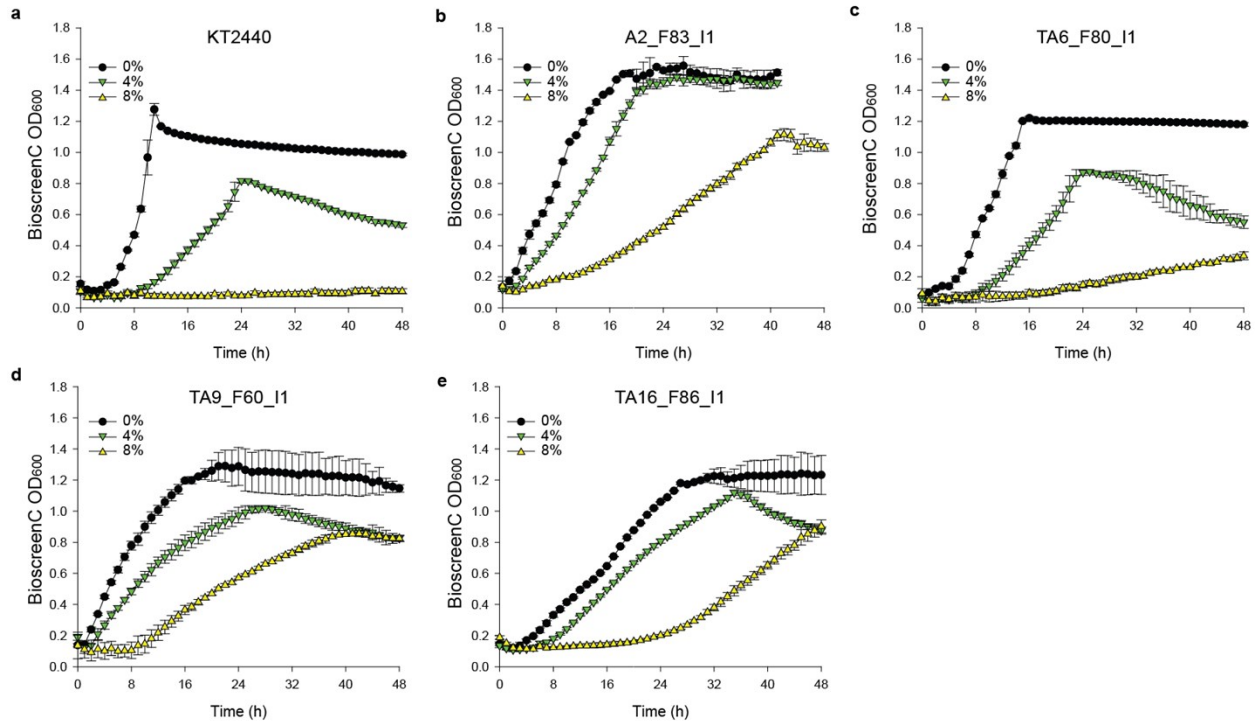

(a-e) Growth profiles of (a) the KT2440 and the best end-point strains (b-A2\_F83\_I1, c-TA6\_F80\_I1, d-TA9\_F60\_I1, e-TA16\_F86\_I1) showing highest growth rates with 8% [TEA][HS] from the same experimental conditions. The *x*-axis and *y*-axis indicate time (h) and OD<sub>600</sub>, respectively. Error bars indicate the standard deviation of three independent cultures (*n*=3). Symbol: black circle, 0%; green down triangle, 4%; yellow up triangle, 8%

**Fig. S6. Growth rate comparison of the wild-type strain and the end-point strains from the control ALE experiments**

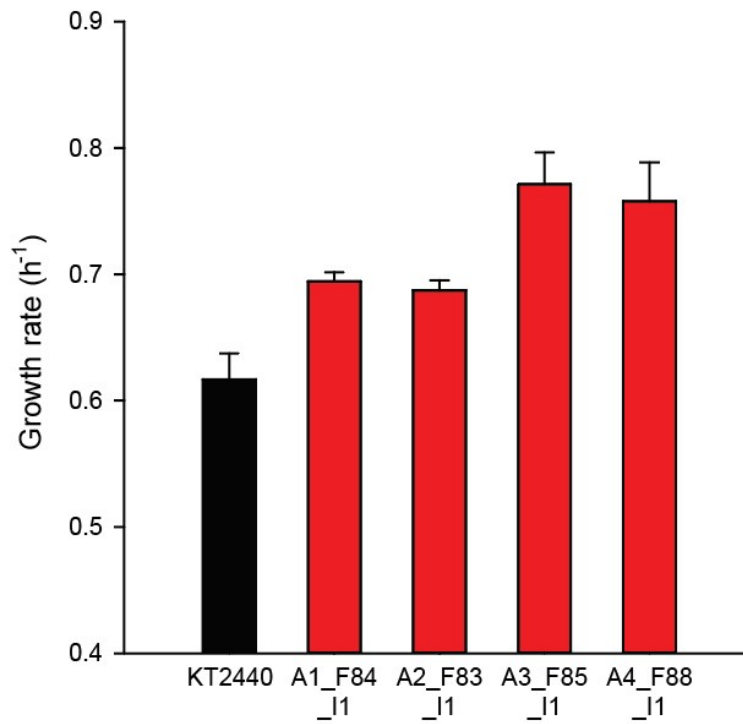

The y-axis indicates the maximum specific growth rate (h<sup>-1</sup>). Error bars indicate the standard deviation of three independent cultures ( $n=3$ ).

**Fig. S7. Mutations on the genomic regions in the evolved strains**

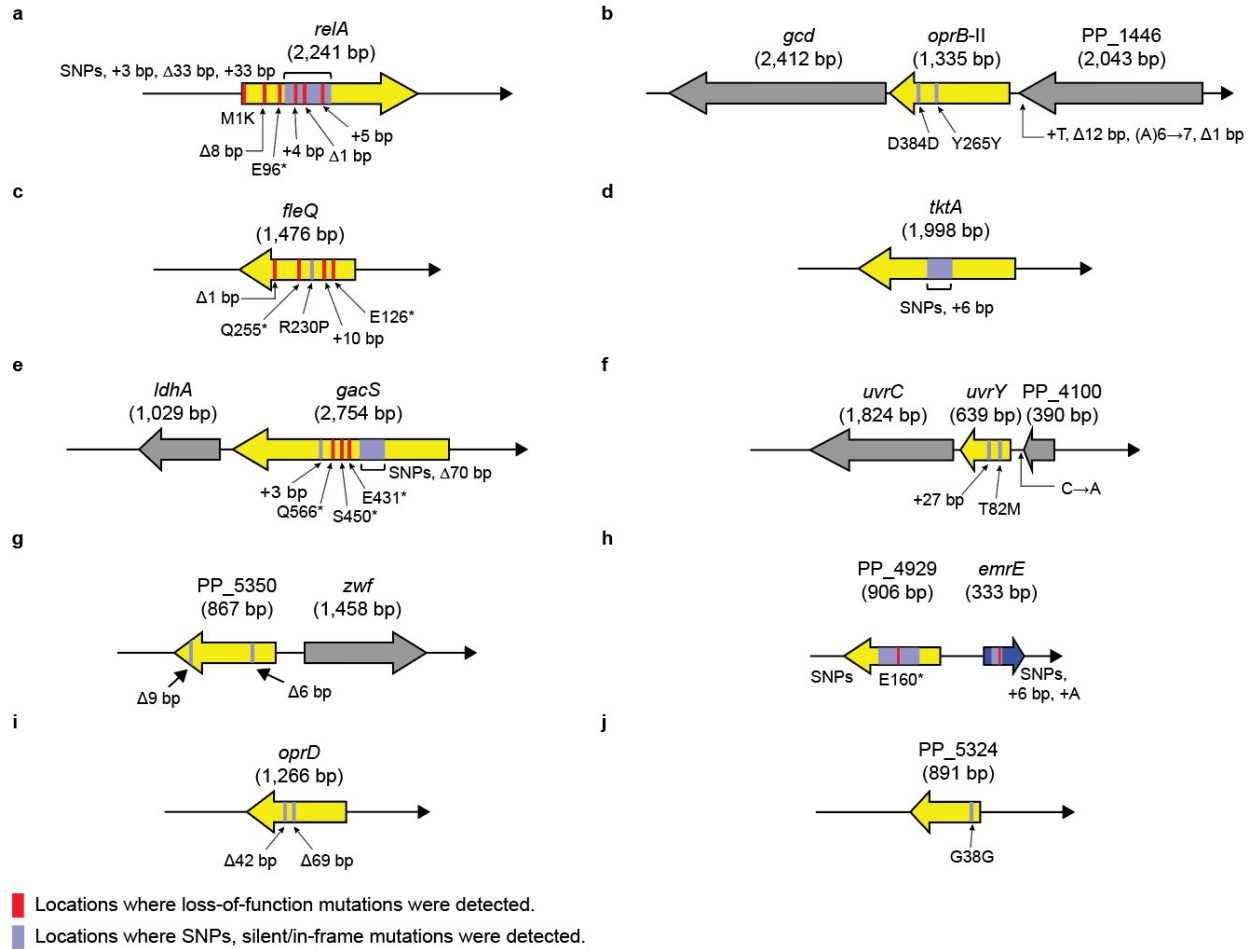

Mutations observed in the evolved strains were depicted (a-j). (a) *relA* encodes ATP:GTP 3'-pyrophosphotransferase (b) *gcd*, *oprB-II*, and PP\_1446 encode quinoprotein glucose dehydrogenase, carbohydrate-selective porin, and TonB-dependent receptor (c) *fleQ* encodes a transcriptional regulator (d) *tktA* encodes transketolase (e) *ldhA* and *gacS* encode D-lactate dehydrogenase and sensor protein (f) *uvrC* and *uvrY* encode UvrABC system protein C and BarA-UvrY two-component system response regulator. PP\_4100 encodes Cro-CI family transcriptional regulator. (g) PP\_5350 and *zwf* encode RpiR family transcriptional regulator and glucose 6-phosphate 1-dehydrogenase (h) PP\_4929 and *emrE* encode LysR family transcriptional regulator and small multidrug resistance protein (i) *oprD* encodes basic amino

acid specific porin. (j) PP\_5324 encodes a two-component system response regulator. Arrows indicate direction of the genome. Red-colored regions indicate loss-of-function mutations such as altered stop codon, early termination, frameshift. Regions showed SNPs, silent or in-frame mutations were colored as purple. All detailed mutations are listed in Supplementary Data 2.

**Fig. S8. Sequence alignment of EmrE in *P. putida* KT2440 and *E. coli* K-12 MG1655.**

| Score         | Expect                                             | Method                                                       | Identities     | Positives   | Gaps      |
|---------------|----------------------------------------------------|--------------------------------------------------------------|----------------|-------------|-----------|
| 101 bits(252) | 2e-34                                              | Compositional matrix adjust.                                 | 52/110(47%)    | 73/110(66%) | 0/110(0%) |
| Query 1       | MNAYTYLAIAICA                                      | AEVIATASMKAVKGLSTPLPLLLM                                     | VVGYGIAFWMLTLW | RSIPVGIAY   | 60        |
| Sbjct 1       | MN Y YL AI AEVI T MK +G + P + ++ Y +FW+L + IP GIAY | MNPYIYLGGAILAEVIGTTLMKFSEGFTRLWPSVGTIICYCASFWLLAQTLAYIPTGIAY |                |             | 60        |
| Query 61      | AIWSGLGIVLISVAALVIYGQKLDMPAM                       | LGMMAMIVGGVVIQLFSKTAGH                                       |                | 110         |           |
| Sbjct 61      | AIWSG+GIVLIS+ + +GQ+LD+PA++GM +I GV++I L S++ H     | AIWSGVGIVLISLLSWGFFGQRDLPAIIGMMLICAGVLIINLLSRSTPH            |                | 110         |           |

The query sequence is the amino acid sequence of EmrE in the KT2440 strain and the subject (Sbjct) sequence is the amino acid sequence of EmrE in *E. coli* K-12 MG1655.



**Fig. S9. Growth dependency of the wild-type KT2440 and TA8\_F83\_I1 strain to acetate**

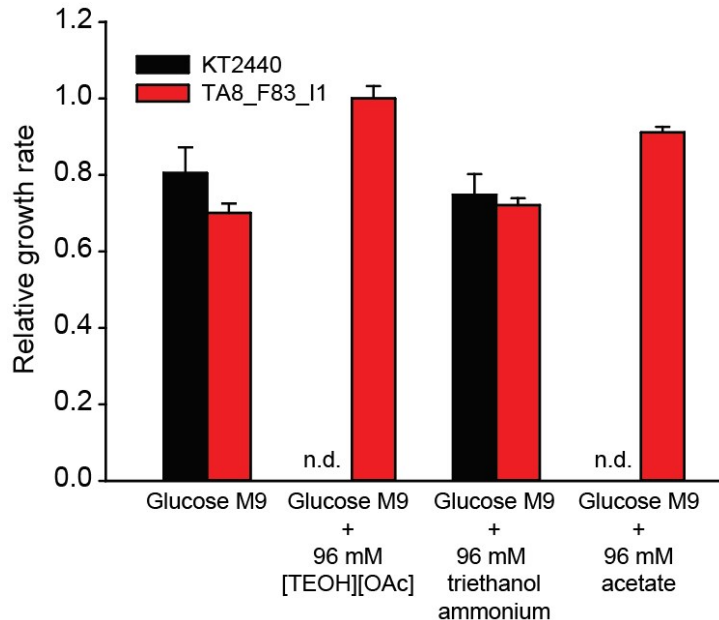

Relative growth rates of wild-type KT2440 and TA8\_F83\_I1 strains in 200  $\mu$ L of the medium depending on additional supplementation of 96 mM (2% w/v) [TEOH][OAc] or the equimolar concentration of each component. Triethanolamine and acetic acid were neutralized to pH 7 by the addition of hydrochloric acid and sodium hydroxide, respectively. The cultivation was monitored for 24 h. All growth rates are normalized values by the growth rate of the TA8\_F83\_I1 strain with 96 mM [TEOH][OAc]. Error bars indicate the standard deviation of three independent cultures ( $n=3$ ). N.d.: no detectable growth.

## Supplementary Tables

**Table S1. Strains and plasmids used in this study**

| <b>Name<sup>a</sup></b> | <b>Description<sup>b</sup></b>             | <b>Source</b> |
|-------------------------|--------------------------------------------|---------------|
| <b>Strains</b>          |                                            |               |
| KT2440                  | Wild-type <i>Pseudomonas putida</i> KT2440 | ATCC 47054    |
| <i>E. coli</i> S-17     | A host for the conjugation                 | ATCC 47055    |
| A1_F84_I1               | An isolate from ALE lineage 1              | This study    |
| A2_F83_I1               | An isolate from ALE lineage 2              | This study    |
| A3_F85_I1               | An isolate from ALE lineage 3              | This study    |
| A4_F88_I1               | An isolate from ALE lineage 4              | This study    |
| TA5_F91_I1              | An isolate from TALE lineage 5             | This study    |
| TA6_F80_I1              | An isolate from TALE lineage 6             | This study    |
| TA7_F80_I1              | An isolate from TALE lineage 7             | This study    |
| TA8_F83_I1              | An isolate from TALE lineage 8             | This study    |
| TA9_F60_I1              | An isolate from TALE lineage 9             | This study    |
| TA10_F54_I1             | An isolate from TALE lineage 10            | This study    |
| TA11_F50_I1             | An isolate from TALE lineage 11            | This study    |
| TA12_F55_I1             | An isolate from TALE lineage 12            | This study    |
| TA13_F83_I1             | An isolate from TALE lineage 13            | This study    |
| TA14_F82_I1             | An isolate from TALE lineage 14            | This study    |
| TA15_F84_I1             | An isolate from TALE lineage 15            | This study    |
| TA16_F86_I1             | An isolate from TALE lineage 16            | This study    |

|                          |                                          |            |
|--------------------------|------------------------------------------|------------|
| S17_PP_5350'             | <i>E. coli</i> S-17/pTE275_PP_5350'      | This study |
| KT2440_PP_5350'          | KT2440 PP_5350 (811-819del)              | This study |
| S17_Δ <i>emrE</i>        | <i>E. coli</i> S-17/pTE275_Δ <i>emrE</i> | This study |
| TA9_F60_I1_Δ <i>emrE</i> | A9_F60_I1 Δ <i>emrE</i>                  | This study |

### Plasmids

|                      |                                                                                                                                                                                                              |            |
|----------------------|--------------------------------------------------------------------------------------------------------------------------------------------------------------------------------------------------------------|------------|
| pEX18GM              | <i>sacB</i> -Gnt <sup>R</sup> , a plasmid for the conjugation and a modified version of pEX18GM to have additional sequence.                                                                                 | 16         |
| pTE275_PP_5350'      | <i>sacB</i> -Gnt <sup>R</sup> , for the introduction of the PP_5350 mutation (811-819del)<br><a href="https://benchling.com/s/seq-94PMk93oehwWYf3iTzDA">https://benchling.com/s/seq-94PMk93oehwWYf3iTzDA</a> | This study |
| pTE275_Δ <i>emrE</i> | <i>sacB</i> -Gnt <sup>R</sup> , for the deletion of <i>emrE</i> ,<br><a href="https://benchling.com/s/seq-BUD8is3VWEEt72VNDWgJ">https://benchling.com/s/seq-BUD8is3VWEEt72VNDWgJ</a>                         | This study |

<sup>a</sup>Number after “F” indicates the flask number which the strain was isolated from.

<sup>b</sup>See Supplementary Data 2 for detailed genotypes. Gnt<sup>R</sup> indicates the gentamycin resistance gene.

**Table S2. A list of oligonucleotides used in this study.**

| <b>Name</b>         | <b>Sequence (5' – 3')</b>                             |
|---------------------|-------------------------------------------------------|
| PP_5350_F           | TGCTTCAGGGCTTCGGCGGCTAGTCGACCCGTGCGGAAAA              |
| PP_5350_B           | AGGCTTTGAGCAATTGGTCGCTGGACATGCAGCTGTCGGA              |
| PP_5350_V_F         | TCCGACAGCTGCATGTCCAGCGACCAATTGCTCAAAGCCTCTAA<br>G     |
| PP_5350_V_B         | TTTTCCGCACGGGTCTGACTAGCCGCCGAAGCCCTGAAG               |
| PP_5350_check_<br>F | AAGTCGGCGCTCTGTGAAGC                                  |
| PP_5350_check_<br>B | GTCGCGTATTCACCCTAGCG                                  |
| SacB_end_F          | GCGAGACGAAAGGGCCTCG                                   |
| EmrE_F1             | TGCTTCAGGGCTTCGGCGGGCGGGCCAAAGCTCGGTTTCCA             |
| EmrE_B1             | CAATGCCCAGCGGTCTTCGATTCGGCGCAGATGGCAATGG              |
| EmrE_F2             | CCATTGCCATCTGCGCCGAATCGAAGACCGCTGGGCATTG              |
| EmrE_B2             | AGGCTTTGAGCAATTGGTCGGGAATGCGTGCAGGGTTGGC              |
| EmrE_V_F            | GCCAACCCTGCACGCATTCCCGACCAATTGCTCAAAGCCTCTAA<br>GAAAC |
| EmrE_V_B            | TGGAAACCGAGCTTTGGCCCCGCCGCCGAAGCCCTGAAG               |
| EmrE_check_F        | GATCAGGCTCATCTCGGCCAG                                 |
| EmrE_check_B        | GGTACTTCACGCCCTGATCG                                  |

**Table S3. Summary of the ALE experiment results**

| Lineage | Target ionic liquid                    | Starting concentration (% w/v) | Initial growth rate <sup>a</sup> | Number of passages | Number of generations | Cumulative cell division (CCD, 10 <sup>12</sup> ) | Final concentration (% w/v) | Final growth rate <sup>a</sup> |
|---------|----------------------------------------|--------------------------------|----------------------------------|--------------------|-----------------------|---------------------------------------------------|-----------------------------|--------------------------------|
| ALE1    | None                                   | 0                              | 0.64 ± 0.09                      | 84                 | 583                   | 2.88                                              | 0                           | 0.77 ± 0.07                    |
| ALE2    |                                        |                                | 0.61 ± 0.03                      | 83                 | 572                   | 2.90                                              | 0                           | 0.75 ± 0.05                    |
| ALE3    |                                        |                                | 0.60 ± 0.08                      | 85                 | 580                   | 2.80                                              | 0                           | 0.87 ± 0.03                    |
| ALE4    |                                        |                                | 0.47 ± 0.05                      | 88                 | 609                   | 3.10                                              | 0                           | 0.75 ± 0.08                    |
| TALE5   | [TEOH][OAc]                            | 0.5                            | 0.38 ± 0.10                      | 91                 | 597                   | 2.60                                              | 4.5                         | 0.13 ± 0.02                    |
| TALE6   |                                        |                                | 0.31 ± 0.03                      | 80                 | 544                   | 2.59                                              | 4.1                         | 0.11 ± 0.02                    |
| TALE7   |                                        |                                | 0.32 ± 0.08                      | 80                 | 549                   | 2.73                                              | 4.5                         | 0.12 ± 0.04                    |
| TALE8   |                                        |                                | 0.29 ± 0.02                      | 83                 | 563                   | 2.79                                              | 4.1                         | 0.13 ± 0.01                    |
| TALE9   | [TEA][HS]                              | 2                              | 0.29 ± 0.04                      | 60                 | 402                   | 2.18                                              | 7.2                         | 0.17 ± 0.03                    |
| TALE10  |                                        |                                | 0.36 ± 0.13                      | 54                 | 366                   | 1.81                                              | 7.2                         | 0.13 ± 0.05                    |
| TALE11  |                                        |                                | 0.33 ± 0.06                      | 50                 | 335                   | 1.64                                              | 7.2                         | 0.15 ± 0.04                    |
| TALE12  |                                        |                                | 0.32 ± 0.09                      | 55                 | 383                   | 2.12                                              | 7.6                         | 0.21 ± 0.05                    |
| TALE13  | A 1:1 mix of [TEOH][OAc] and [TEA][HS] | 1                              | 0.44 ± 0.25                      | 83                 | 566                   | 2.78                                              | 5.1                         | 0.09 ± 0.01                    |
| TALE14  |                                        |                                | 0.35 ± 0.09                      | 82                 | 548                   | 2.49                                              | 4.7                         | 0.12 ± 0.01                    |
| TALE15  |                                        |                                | 0.33 ± 0.07                      | 84                 | 566                   | 2.62                                              | 5.1                         | 0.09 ± 0.01                    |
| TALE16  |                                        |                                | 0.40 ± 0.12                      | 86                 | 567                   | 2.57                                              | 4.7                         | 0.11 ± 0.02                    |

<sup>a</sup>The growth rates were measured using the automated liquid handling platform<sup>17</sup>.

**Table S4. Highly differentially expressed genes upon the addition of the ILs**

| <b>Locus tag<sup>a</sup></b> | <b>Gene</b>   | <b>Description</b>                                           | <b>Fold changes (FCs)</b> |
|------------------------------|---------------|--------------------------------------------------------------|---------------------------|
| <b>[TEOH][OAc]</b>           |               |                                                              |                           |
| PP_0372                      | <i>aruC</i>   | Acetylornithine aminotransferase 2                           | 266.2                     |
| PP_4488                      |               | Conserved exported protein of unknown function               | 221.9                     |
| PP_4557                      |               | Conserved exported protein of unknown function               | 177.6                     |
| PP_0269                      |               | Putative glutamate synthase, large subunit                   | 107.2                     |
| PP_1266                      |               | Putative fusaric acid resistance protein                     | 82.0                      |
| PP_1264                      |               | Putative fusaric acid resistance protein                     | 56.9                      |
| PP_2222                      |               | Conserved protein of unknown function                        | 50.2                      |
| PP_5458                      |               | Conserved exported protein of unknown function               | 48.4                      |
| PP_1263                      |               | Putative fusaric acid resistance protein                     | 46.9                      |
| PP_1743                      | <i>actP-I</i> | Acetate permease                                             | -19.5                     |
| PP_2035                      | <i>benE-I</i> | Benzoate transport protein                                   | -17.5                     |
| PP_3164                      | <i>benD</i>   | 1,6-Dihydroxycyclohexa-2,4-diene-1-carboxylate dehydrogenase | -14.6                     |
| PP_2037                      |               | Putative aldolase                                            | -14.3                     |
| PP_1559                      |               | Holin                                                        | 13.6                      |
| PP_3577                      | <i>fecI</i>   | RNA polymerase, sigma 19 factor                              | 12.2                      |
| PP_3163                      | <i>benC</i>   | Benzoate 1,2-dioxygenase electron transfer                   | -10.9                     |
| PP_0883                      | <i>opdP</i>   | Glycine-glutamate dipeptide porin                            | -10.7                     |
| PP_0799                      | <i>opdC</i>   | Histidine-specific outer membrane porin D                    | 10.4                      |
| PP_2036                      |               | Putative 4-hydroxy-tetrahydrodipicolinate synthase           | -10.2                     |
| <b>[TEA][HS]</b>             |               |                                                              |                           |
| PP_3726                      |               | Enoyl-CoA hydratase                                          | 108.3                     |
| PP_3725                      |               | Putative acyl-CoA dehydrogenase                              | 80.3                      |
| PP_2817                      | <i>mexC</i>   | Multidrug efflux RND membrane fusion protein                 | 60.6                      |
| PP_3724                      |               | Putative acyl-CoA synthetase                                 | 38.1                      |
| PP_4930                      | <i>emrE</i>   | Putative small multidrug resistance protein                  | 35.1                      |
| PP_3723                      | <i>aruI</i>   | Putative 2-ketoarginine decarboxylase AruI                   | 23.4                      |
| PP_5073                      |               | Conserved exported protein of unknown function               | 19.9                      |
| PP_5340                      | <i>aphA</i>   | Acetylpolyamine aminohydrolase                               | 14.6                      |
| PP_4738                      |               | Conserved exported protein of unknown function               | 13.7                      |
| PP_2818                      | <i>mexD</i>   | Multidrug efflux RND transporter MexD                        | 13.4                      |
| PP_4561                      | <i>csbD</i>   | Stress response protein                                      | 12.9                      |
| PP_1750                      | <i>asnB</i>   | Asparagine synthetase                                        | 12.7                      |
| PP_3732                      |               | Enoyl-CoA hydratase                                          | 10.9                      |
| PP_1185                      | <i>oprH</i>   | Outer membrane protein H1                                    | 10.3                      |

<sup>a</sup>Only differentially expressed genes (DEGs) whose FCs are larger than 10 were listed in this table. See Supplementary Data 2 for full lists of DEGs (FCs are greater than or equal to 2).

**Table S5. Quantification of sugars and sugar byproducts**

| Ionic liquid    | Final volume (mL) | Sugar (g/L)     |                | Sugar byproduct (g/L) |                           | Sugar yield <sup>a</sup> (% g sugar/g total sugar) |                 |
|-----------------|-------------------|-----------------|----------------|-----------------------|---------------------------|----------------------------------------------------|-----------------|
|                 |                   | Glucose         | Xylose         | Furfural              | 5- Hydroxy methylfurfural | Glucose                                            | Xylose          |
| [TEOH]<br>[OAc] | 500               | 11.13<br>± 0.47 | 6.61<br>± 0.35 | n.d.                  | n.d.                      | 71.95<br>± 3.06                                    | 70.90<br>± 3.74 |
| [TEA]<br>[HS]   | 400               | 15.63<br>± 1.31 | 1.79<br>± 0.17 | 1.75<br>± 0.08        | 0.35<br>± 0.04            | 80.79<br>± 6.75                                    | 15.38<br>± 1.44 |

20 g of sorghum was pretreated using the ILs. Error bars indicate standard deviations of three measurements ( $n=3$ ). n.d. not detectable ( $< 0.01$  g/L)

<sup>a</sup>Glucan and xylan contents in sorghum were assumed to be 34.82% (g/g) and 20.44% (g/g), respectively (<https://bioenergylibrary.inl.gov/Sample/BiomassInfo.aspx>). The glucan and xylan weights were converted to the glucose and xylose weights by multiplying a factor of 1.111.



## Supplementary Reference

1. D. Chatterji and A. K. Ojha, *Curr. Opin. Microbiol.*, 2001, **4**, 160–165.
2. J. M. Bergman, D. L. Hammarlöf, and D. Hughes, *PLoS One*, 2014, **9**, e90486.
3. E. T. Mohamed, A. Z. Werner, D. Salvachúa, C. Singer, K. Szostkiewicz, M. Jiménez-Díaz, T. Eng, M. S. Radi, A. Mukhopadhyay, M. J. Herrgård, S. W. Singer, G. T. Beckham, and A. M. Feist, *Metab Eng Commun*, submitted.
4. S. Chevalier, E. Bouffartigues, J. Bodilis, O. Maillot, O. Lesouhaitier, M. G. J. Feuilleley, N. Orange, A. Dufour, and P. Cornelis, *FEMS Microbiol. Rev.*, 2017, **41**, 698–722.
5. S. S. Fong, A. R. Joyce, and B. Ø. Palsson, *Genome Res.*, 2005, **15**, 1365–1372.
6. E. Blanco-Romero, M. Redondo-Nieto, F. Martínez-Granero, D. Garrido-Sanz, M. I. Ramos-González, M. Martín, and R. Rivilla, *Sci. Rep.*, 2018, **8**, 13145.
7. G. J. Bentley, N. Narayanan, R. K. Jha, D. Salvachúa, J. R. Elmore, G. L. Peabody, B. A. Black, K. Ramirez, A. De Capite, W. E. Michener, A. Z. Werner, D. M. Klingeman, H. S. Schindel, R. Nelson, L. Foust, A. M. Guss, T. Dale, C. W. Johnson, and G. T. Beckham, *Metab. Eng.*, 2020.
8. T. del Castillo, J. L. Ramos, J. J. Rodríguez-Herva, T. Fuhrer, U. Sauer, and E. Duque, *J. Bacteriol.*, 2007, **189**, 5142–5152.
9. M. Martínez-Gil, M. I. Ramos-González, and M. Espinosa-Urgel, *J. Bacteriol.*, 2014, **196**, 1484–1495.

10. E. Duque, J. de la Torre, P. Bernal, M. A. Molina-Henares, M. Alaminos, M. Espinosa-Urgel, A. Roca, M. Fernández, S. de Bentzmann, and J.-L. Ramos, *Environ. Microbiol.*, 2013, **15**, 36–48.
11. D. van den Broek, T. F. C. Chin-A-Woeng, G. V. Bloemberg, and B. J. J. Lugtenberg, *Microbiology*, 2005, **151**, 1403–1408.
12. M. M. Ochs, M. P. McCusker, M. Bains, and R. E. Hancock, *Antimicrob. Agents Chemother.*, 1999, **43**, 1085–1090.
13. S. Follonier, I. F. Escapa, P. M. Fonseca, B. Henes, S. Panke, M. Zinn, and M. A. Prieto, *Microb. Cell Fact.*, 2013, **12**, 30.
14. J. J. Rodríguez-Herva, E. Duque, M. A. Molina-Henares, G. Navarro-Avilés, P. Van Dillewijn, J. De La Torre, A. J. Molina-Henares, A. S. La Campa, F. A. Ran, A. Segura, V. Shingler, and J.-L. Ramos, *Environ. Microbiol. Rep.*, 2010, **2**, 373–380.
15. D. Szklarczyk, A. L. Gable, D. Lyon, A. Junge, S. Wyder, J. Huerta-Cepas, M. Simonovic, N. T. Doncheva, J. H. Morris, P. Bork, L. J. Jensen, and C. von Mering, *Nucleic Acids Res.*, 2019, **47**, D607–D613.
16. T. T. Hoang, R. R. Karkhoff-Schweizer, A. J. Kutchma, and H. P. Schweizer, *Gene*, 1998, **212**, 77–86.
17. R. A. LaCroix, B. O. Palsson, and A. M. Feist, *Appl. Environ. Microbiol.*, 2017, **83**.
