# Supplementary material for: Generation of ionic liquid tolerant Pseudomonas putida KT2440 strains via adaptive laboratory evolution
Source: Royal Society of Chemistry journal article supplement (doi:10.1039/d0gc01663b), 2020-01-01
Supplement: d0gc01663b2.xlsx [file d0gc01663b2.xlsx]

## Sheet: starting strain mutations
Supplementary Data 1. Mutations found in the wildtype Pseudomonas putida KT2440 strain
#	Position	Mutation	Gene	The KT2440 used in this study	The KT2440 used in a previous studya
1	233545	T→C, G548G (GGT→GGC)	PP_0180 →	Yes	No
2	278744	+A, intergenic (‑239/+75)	PP_0224 ← / ← sctC	Yes	Yes
3	307866	+C, intergenic (+881/‑988)	hslO → / → PP_0254	Yes	Yes
4	336125	+T, coding (210/237 nt)	PP_0278 →	Yes	Yes
5	353067	A→G, intergenic (+34/+84)	hisF → / ← cbcV	Yes	Yes
6	499203	A→G, intergenic (+47/‑249)	uhpA → / → PP_0411	Yes	Yes
7	1070248	+GA, intergenic (+48/+94)	aroP‑I → / ← PP_0928	Yes	Yes
8	1126647	+C, intergenic (‑101/+48)	tdcG‑II ← / ← gcvP‑I	Yes	Yes
9	1419549	+C, intergenic (‑38/+98)	PP_1242 ← / ← PP_1244	Yes	Yes
10	1499480	2 bp→AC, intergenic (+57/‑106)	trpS → / → zapE	Yes	Yes
11	1499498	1 bp→CG, intergenic (+75/‑89)	trpS → / → zapE	Yes	Yes
12	1499508	+C, intergenic (+85/‑79)	trpS → / → zapE	Yes	Yes
13	1510852	(CGGCTGGCTGGCCAGCTCCTTGAGCTTGGTCAG)1→2, coding (715/1818 nt)	PP_1325 ←	Yes	No
14	1851522	G→A, G203D (GGT→GAT)	relA →	Yes	No
15	1932640	+C, intergenic (‑107/+43)	rluA ← / ← minE	Yes	Yes
16	2921460	G→A, G3494R (GGG→AGG)	PP_2561 →	No	Yes
17	2958523	C→T, A428V (GCA→GTA)	PP_2589 →	Yes	No
18	3845705	+G, intergenic (‑72/+26)	PP_3394 ← / ← PP_3395	Yes	Yes
19	3951159	T→C, intergenic (‑123/+72)	PP_3486 ← / ← PP_3487	Yes	Yes
20	3951161	A→T, intergenic (‑125/+70)	PP_3486 ← / ← PP_3487	Yes	Yes
21	4586030	2 bp→TC, intergenic (+113/+101)	PP_4061 → / ← PP_4063	Yes	Yes
22	4586035	+G, intergenic (+118/+97)	PP_4061 → / ← PP_4063	Yes	Yes
23	4586057	+C, intergenic (+140/+75)	PP_4061 → / ← PP_4063	Yes	Yes
24	4740811	(T)7→6, intergenic (+48/+705)	gltA → / ← yeiW	Yes	Yes
25	4740816	T→G, intergenic (+53/+700)	gltA → / ← yeiW	Yes	Yes
26	4740819	2 bp→CT, intergenic (+56/+696)	gltA → / ← yeiW	Yes	Yes
27	4741246	Δ1 bp, intergenic (+483/+270)	gltA → / ← yeiW	Yes	Yes
28	4741263	A→C, intergenic (+500/+253)	gltA → / ← yeiW	Yes	Yes
29	4741272	A→G, intergenic (+509/+244)	gltA → / ← yeiW	Yes	Yes
30	4741274	A→C, intergenic (+511/+242)	gltA → / ← yeiW	Yes	Yes
31	4741276	G→C, intergenic (+513/+240)	gltA → / ← yeiW	Yes	Yes
32	4741278	C→T, intergenic (+515/+238)	gltA → / ← yeiW	Yes	Yes
33	4741283	+T, intergenic (+520/+233)	gltA → / ← yeiW	Yes	Yes
34	4741289	C→G, intergenic (+526/+227)	gltA → / ← yeiW	Yes	Yes
35	4741292	C→T, intergenic (+529/+224)	gltA → / ← yeiW	Yes	Yes
36	4741294	C→G, intergenic (+531/+222)	gltA → / ← yeiW	Yes	Yes
37	4741296	A→C, intergenic (+533/+220)	gltA → / ← yeiW	Yes	Yes
38	4741298	C→T, intergenic (+535/+218)	gltA → / ← yeiW	Yes	Yes
39	4980585	+GGC, intergenic (‑24/+44)	PP_4387 ← / ← flgE	Yes	Yes
40	5555608	+GCC, intergenic (‑84/+87)	PP_4887 ← / ← PP_4888	Yes	Yes
41	5674751	+G, intergenic (+113/+27)	rhlE‑II → / ← yceI	Yes	Yes
42	5674753	G→C, intergenic (+115/+25)	rhlE‑II → / ← yceI	Yes	Yes
43	5681415	+CGGG, intergenic (‑133/+71)	PP_4986 ← / ← PP_4987	Yes	Yes
44	6013885	T→C, intergenic (+90/+20)	xpt → / ← PP_5266	Yes	Yes
The newly sequenced genome was compared with the reference genome of the KT2440 (NCBI Reference Sequence: NC_002947.4).
a E. T. Mohamed, A. Z. Werner, D. Salvachúa, C. Singer, K. Szostkiewicz, M. Jiménez-Díaz, T. Eng, M. S. Radi, A. Mukhopadhyay, M. J. Herrgård, S. W. Singer, G. T. Beckham, and A. M. Feist, Metab Eng Commun, Submitted.

## Sheet: filtered mutaitons
Mutations below have been filtered from the analysis
Position	Region	Mutation	Annotation
699725	PP_t06, PP_23SD	A→G	intergenic (+115/‑129)
1327127	PP_16SE, PP_23SE	C→T	intergenic (+97/‑196)
4,348,749	PP_3820, galU	A→G	intergenic (‑70/+404)
	gltA, yeiW
