# Supplementary material for: Generation of ionic liquid tolerant Pseudomonas putida KT2440 strains via adaptive laboratory evolution
Source: Royal Society of Chemistry journal article supplement (doi:10.1039/d0gc01663b), 2020-01-01
Supplement: d0gc01663b3.xlsx [file d0gc01663b3.xlsx]

## Sheet: Full mutations
						ALE isolates and populations
						ALE w/o the ILs																			TALE w/ [TEOH][OAc]																				TALE w/ [TEA][HS]
position	Mutation type	Mutation	Mutated region		Loss of function?	A1_F11_I1	A1_F32_I1	A1_F54_I1	A1_F84_I0	A1_F84_I1	A2_F11_I1	A2_F31_I1	A2_F52_I1	A2_F83_I0	A2_F83_I1	A3_F11_I1	A3_F32_I1	A3_F53_I1	A3_F85_I1	A4_F9_I1	A4_F32_I1	A4_F53_I1	A4_F88_I0	A4_F88_I1	TA5_F26_I1	TA5_F43_I1	TA5_F63_I1	TA5_F91_I0	TA5_F91_I1	TA6_F19_I1	TA6_F35_I1	TA6_F54_I1	TA6_F80_I0	TA6_F80_I1	TA7_F22_I1	TA7_F36_I1	TA7_F55_I1	TA7_F80_I0	TA7_F80_I1	TA8_F23_I1	TA8_F36_I1	TA8_F56_I1	TA8_F83_I0	TA8_F83_I1	TA9_F17_I1	TA9_F35_I1	TA9_F43_I1	TA9_F60_I0	TA9_F60_I1
Fit mean - read depth						53.5577	33.0357	50.3484	17.5746	334.416	45.2532	69.6305	64.2023	20.988	394.553	44.7811	76.1812	90.6852	321.458	29.1459	42.1752	31.0302	30.6799	294.303	37.9704	33.5421	50.3471	53.3579	256.9	104.323	73.4638	55.7675	124.788	279.023	47.3923	31.2306	42.3175	65.3565	208.344	61.0768	77.1558	51.0847	96.1186	296.92	17.2953	31.8701	36.9345	79.5285	246.535
68	SNP	G→A	–, parB	intergenic (–/+80)		0	0	0	0	0	0	0	0	0	0	0	0	0	0	0	0	0	0	0	0	0	0	0	0	0	0	0	0	0	0	0	0	0	0	0	0	0	0	0	0	0	0	0	0
72	SNP	G→T	–, parB	intergenic (–/+75)		0	0	0	0	0	0	0	0	0	0	0	0	0	0	0	0	0	0	0	0	0	0	0	0	0	0	0	0	0	0	0	0	0	0	0	0	0	0	0	0	0	0	0	0
409081	SNP	C→T	aceE	G529D (GGC→GAC)		0	0	0	0	0	0	0	0	0	0	0	0	0	0	0	0	0	0	0	0	0	0	0.71	0	0	0	0	0	0	0	0	0	0	0	0	0	0	0	0	0	0	0	0	0
546893	SNP	G→T	rpsG	G81C (GGC→TGC)		0	0	0	0	0	0	0	0	0	0	0	0	0	0	0	0	0	0	0	0	0	0	0	1	0	0	0	0	0	0	0	0	0	0	0	0	0	0	0	0	0	0	0	0
550760	SNP	G→A	rpsJ	G33S (GGT→AGT)		0	0	0	0	0	0	0	0	0	0	0	0	0	0	0	0	0	0	1	0	0	0	0	0	0	0	0	0	0	0	0	0	0	0	0	0	0	0	0	0	0	0	0	0
643952	SNP	C→G	acoB	M19I (ATG→ATC)		0	0	0	0	0	0	0	0	0	0	0	0	0	0	0	0	0	0	0	1	1	1	0	0	0	0	0	0	0	0	0	0	1	1	0	0	0	0	0	0	0	0	0	0
794134	SNP	C→T	PP_0680	A91A (GCC→GCT)		0	0	0	0	0	0	0	0	0	0	0	0	0	1	0	0	0	0	0	0	0	0	0	0	0	0	0	0	0	0	0	0	0	0	0	0	0	0	0	0	0	0	0	0
919675	SNP	G→C	PP_5458, PP_0800	intergenic (‑143/+48)		0	0	0	0	0	0	0	0	0	0	0	0	0	0	0	0	0	0	0	0	0	0	0	0	0	0	0	0	0	0	0	0	0	0	0	0	0	0	0	0	0	0	0	0
1030462	SNP	T→G	PP_0887	F173V (TTC→GTC)		0	0	0	0	0	0	0	0	0	0	0	0	0	0	0	0	0	0	0	0	0	0	0	0	0	0	0	0	0	0	0	0	0	0	0	0	0	0	0	0	0	0	0	0
1138858	SNP	C→T	arcB	G265S (GGT→AGT)		0	0	0	0	0	0	0	0	0	0	0	0	0	1	0	0	0	0	0	0	0	0	0	0	0	0	0	0	0	0	0	0	0	0	0	0	0	0	0	0	0	0	0	0
1385477	DEL	Δ42 bp	oprD	coding (945‑986/1266 nt)		0	0	0	0	0	0	0	0	0	0	0	0	0	0	0	0	0	0	0	0	0	0	0	0	0	0	0	0	0	0	0	0	0	0	0	0	0	0	0	0	0	0	0	0
1385534	DEL	Δ69 bp	oprD	coding (861‑929/1266 nt)		0	0	0	0	0	0	0	0	0	0	0	0	0	0	0	0	0	0	0	0	0	0	0	0	0	0	0	0	0	0	0	0	0	0	0	0	0	0	0	0	0	0	1	1
1444440	SNP	C→A	PP_1263	L19L (CTC→CTA)		0	0	0	0	0	0	0	0	0	0	0	0	0	0	0	0	0	0	0	0	0	0	0	0	0	0	0	0	0	0	0	0	0	0	0	0	0	0	0	0	0	0	0	1
1506936	SNP	G→A	petC, sspA	intergenic (+48/‑69)		0	0	0	0.56	0	0	0	0	0	0	0	0	0	0	0	0	0	0	0	0	0	0	0	0	0	0	0	0	0	0	0	0	0	0	0	0	0	0	0	0	0	0	0	0
1506939	SNP	T→C	petC, sspA	intergenic (+51/‑66)		0	0	0	0.5	0	0	0	0	0	0	0	0	0	0	0	0	0	0	0	0	0	0	0	0	0	0	0	0	0	0	0	0	0	0	0	0	0	0	0	0	0	0	0	0
1647612	SNP	G→A	oprB-II	D384D (GAC→GAT)		0	0	0	0	0	0	0	0	0	0	0	0	0	0	0	0	1	1	1	0	0	0	0	0	0	0	0	0	0	0	0	0	0	0	0	0	0	0	0	0	0	0	0	0
1647969	SNP	G→A	oprB-II	Y265Y (TAC→TAT)		0	0	0	0	0	0	0	0	0	0	0	0	0	0	0	0	0	0	0	0	0	0	0	0	0	0	0	0	0	0	0	0	0.75	0	0	0	0	0	0	0	0	0	0	0
1648882	INS	+T	oprB-II, PP_1446	intergenic (‑119/+177)		0	1	1	0	0	0	0	0	0	0	0	0	0	0	0	0	0	0	0	0	0	0	0	0	0	0	0	0	0	0	0	0	0	0	0	0	0	0	0	0	0	0	0	0
1648886	DEL	Δ12 bp	oprB-II, PP_1446	intergenic (‑123/+162)		0	0	0	0	0	0	0	1	0.54	1	0	0	0	0	0	0	0	0	0	0	0	0	0	0	0	0	0	0	0	0	0	0	0	0	0	0	0	0	0	0	0	0	0	0
1648905	INS	(A)6→7	oprB-II, PP_1446	intergenic (‑142/+154)		0	0	0	0	0	0	0	0	0	0	0	0	0	0	0	0	0	0	0	0	0	0	0	0	0	0	0	0	1	0	0	0	0	0	0	0	0	0	0	0	0	0	0	0
1648917	DEL	Δ1 bp	oprB-II, PP_1446	intergenic (‑154/+142)		0	0	0	0	0	0	0	0	0	0	0	0	0	0	0	0	0	0	0	0	0	0	0	0	0	0	0	0	0	0	0	0	0	0	0	0	0	1	0	0	0	0	0	0
1693261	SNP	C→T	PP_1488	A439V (GCC→GTC)		0	0	0	0	0	0	0	0	0	0	0	0	0	0	0	0	0	0	0	0	0	0	0	0	0	0	0	0	0	0	0	0	0	1	0	0	0	0	0	0	0	0	0	0
1738046	DEL	Δ39,415 bp	yffB,PP_1532,PP_1533,PP_1534,PP_1535,PP_1536,PP_1537,PP_5472,PP_1538,PP_1539,PP_1540,PP_1541,PP_1542,PP_1543,PP_1544,PP_1545,PP_1546,PP_5473,PP_5474,PP_1548,PP_5744,PP_1549,PP_1550,PP_1551,PP_1552,PP_1553,PP_1554,PP_1555,PP_1556,PP_1557,PP_1558,PP_1559,PP_1560,PP_1561,PP_1562,PP_1563,PP_1564,PP_1565,PP_1566,PP_1567,PP_1568,PP_1569,PP_1570,PP_1571,PP_1572,PP_1573,PP_1574,PP_1575,PP_1576,PP_1577,PP…		Yes	0	0	0	0	0	0	0	1	0	0	0	0	0	0	0	0	0	0	0	0	0	0	0	0	0	0	0	0	0	0	0	0	0	0	0	0	0	0	0	0	0	0	0	0
1821017	DEL	Δ1 bp	PP_1624	coding (738/1422 nt)	Yes	0	0	0	0	0	0	0	0	0	0	0	0	0	0	0	0	0	0	0	0	0	0	0	0	0	0	0	1	0	0	0	0	0	0	0	0	0	0	0	0	0	0	0	0
1843043	INS	(GAT)2→3	gacS	coding (1793/2754 nt)		0	0	0	0	0	0	0	0	0	0	0	0	0	0	0	0	0	0	0	0	0	0	0	0	0	0	0	0	0	0	1	0	0	0	0	0	0	0	0	0	0	0	0	0
1843140	SNP	G→A	gacS	Q566* (CAG→TAG)	Yes	0	0	0	0	0	0	0	0	0	0	0	0	0	0	0	0	0	0	0	0	0	0	0	0	0	0	0	0	0	0	0	0	0	0	0	0	0	0	0	0	0	0	0	0
1843487	SNP	G→T	gacS	S450* (TCA→TAA)	Yes	0	0	0	0	0	0	0	0	0	0	0	0	0	0	0	0	0	0	0	0	0	0	0	0	0	0	0	0	0	0	0	0	0	0	0	0	0	0	0	0	0	0	0	0
1843545	SNP	C→A	gacS	E431* (GAG→TAG)	Yes	0	0	0	0	0	0	0	0	0	0	0	0	0	0	0	0	0	0	0	0	0	0	0	0	0	1	0	0	0	0	0	0	0	0	0	0	0	0	0	0	0	0	0	0
1843613	SNP	T→C	gacS	N408S (AAC→AGC)		0	0	0	0	0	0	0	0	0	0	0	0	0	0	0	0	0	0	0	0	0	0	0	0	0	0	0	0	0	0	0	0	0	0	0	0	0	0	0	0	0	0	0	0
1843935	SNP	G→A	gacS	L301F (CTC→TTC)		0	0	0	0	0	0	0	0	0	0	0	0	0	0	0	0	0	0	0	0	0	0	0	0	0	0	0	0	0	0	0	0	0	0	0	0	0	0	0	1	0	0	0	0
1844516	DEL	Δ70 bp	gacS	coding (251‑320/2754 nt)	Yes	0	0	0	0	0	0	0	0	0	0	0	0	0	0	0	0	0	0	0	0	0	0	0	0	0	0	0	0	0	0	0	0	0	0	0	0	0	0	0	0	0	0	0	0
1850958	SNP	T→A	relA	M1K (ATG→AAG) †	Yes	0	0	0	0	0	0	0	0	0	0	0	0	0	0	0	0	0	0	0	0	0	0	0	0	0	0	0	0.85	1	0	0	0	0	0	0	0	1	0	0	0	0	0	0	0
1851119	DEL	Δ8 bp	relA	coding (163‑170/2241 nt)	Yes	0	0	0	0	0	0	0	0	0	0	1	0	0	0	0	0	0	0	0	0	0	0	0	0	0	0	0	0	0	0	0	0	0	0	0	0	0	0	0	0	0	0	0	0
1851242	SNP	G→T	relA	E96* (GAG→TAG)	Yes	0	0	0	0	0	0	0	0	0	0	0	0	0	0	0	0	1	1	1	0	0	0	0	0	0	0	0	0	0	0	0	0	0	0	0	0	0	0	0	0	0	0	0	0
1851435	SNP	C→A	relA	A160E (GCG→GAG)		0	0	0	0	0	0	0	0	0	0	0	0	0	0	0	0	0	0	0	0	0	0	0	0	0	1	0	0	0	0	0	0	0	0	0	0	0	0	0	0	0	0	0	0
1851535	INS	+TAC	relA	coding (579/2241 nt)		0	0	0	0	0	0	0	0	0	0	0	0	0	0	0	0	0	0	0	0	0	0	0	0	0	0	0	0	0	0	0	0	0	0	0	1	0	0	0	0	0	0	0	0
1851650	SNP	C→T	relA	R232W (CGG→TGG)		0	0	0	0	0	0	0	0	0	0	0	0	0	0	0	0	0	0	0	0	0	0	0	0	0	0	0	0	0	0	0	0	0	0	0	0	0	0	0	0	0	1	0.94	1
1851762	SNP	C→T	relA	S269L (TCG→TTG)		0	0	0	0	0	0	0	1	0	1	0	0	0	0	0	0	0	0	0	0	0	0	0	0	0	0	0	0	0	0	0	0	0	0	0	0	0	0	0	0	0	0	0	0
1851762	SNP	C→G	relA	S269W (TCG→TGG)		0	0	0	0	1	0	0	0	0	0	0	0	0	0	0	0	0	0	0	0	0	0	0	0	0	0	0	0	0	0	0	0	0	0	0	0	0	0	0	0	0	0	0	0
1851823	INS	(TGCG)2→3	relA	coding (867/2241 nt)	Yes	1	1	1	0.89	0	1	1	0	0	0	0	1	1	0	1	0	0	0	0	0	0	0	0	0	0	0	0	0	0	0	0	0	0	0	0	0	0	0	0	0	0	0	0	0
1851912	SNP	A→G	relA	D319G (GAC→GGC)		0	0	0	0	0	0	0	0	0	0	0	0	0	0	0	0	0	0	0	0	0	0	0	0	0	0	0	0	0	0	0	0	0	0	0	0	0	0	0	0	0	0	0	0
1851914	DEL	Δ1 bp	relA	coding (958/2241 nt)	Yes	0	0	0	0	0	0	0	0	0	0	0	0	0	0	0	1	0	0	0	0	0	0	0	0	0	0	0	0	0	0	0	0	0	0	0	0	0	0	0	0	0	0	0	0
1851914	SNP	G→T	relA	D320Y (GAC→TAC)		0	0	0	0	0	0	0	0	0	0	0	0	0	0	0	0	0	0	0	0	0	0	0	0	0	0	0	0	0	0	0	0	0	0	0	0	0	0	0	1	0	0	0	0
1851994	SNP	G→T	relA	E346D (GAG→GAT)		0	0	0	0	0	0	0	0	0	0	0	0	0	0	0	0	0	0	0	1	1	1	0	0	0	0	0	0	0	0	0	0	1	1	0	0	0	0	0	0	0	0	0	0
1852004	SNP	C→T	relA	R350C (CGT→TGT)		0	0	0	0	0	0	0	0	0	0	0	0	0	0	0	0	0	0	0	0	0	0	0	0	0	0	0	0	0	0	0	0	0	0	0	0	0	0	0	0	0	0	0	0
1852005	SNP	G→A	relA	R350H (CGT→CAT)		0	0	0	0	0	0	0	0	0	0	0	0	0	0	0	0	0	0	0	0	0	0	0	0	0	0	0	0	0	0	0	0	0	0	0	0	0	0	0	0	0	0	0	0
1852047	SNP	C→A	relA	A364D (GCC→GAC)		0	0	0	0	0	0	0	0	0	0	0	0	0	0	0	0	0	0	0	0	0	0	0	0	0	0	0	0	0	0	0	0	0	0	0	0	0	0	0	0	0	0	0	0
1852053	SNP	G→T	relA	W366L (TGG→TTG)		0	0	0	0	0	0	0	0	0	0	0	0	0	1	0	0	0	0	0	0	0	0	0	0	0	0	0	0	0	0	0	0	0	0	0	0	0	0	0	0	0	0	0	0
1852116	SNP	T→C	relA	L387S (TTG→TCG)		0	0	0	0	0	0	0	0	0	0	0	0	0	0	0	0	0	0	0	0	0	0	0	0	0	0	0	0	0	0	0	0	0	0	0	0	0	0	0	0	0	0	0	0
1852158	DEL	Δ33 bp	relA	coding (1202‑1234/2241 nt)		0	0	0	0	0	0	0	0	0	0	0	0	0	0	0	0	0	0	0	0	0	0	0	0	0	0	0	0	0	0	0	0	0	0	0	0	0	1	0	0	0	0	0	0
1852168	INS	(TGGCC)2→3	relA	coding (1212/2241 nt)	Yes	0	0	0	0	0	0	0	0	0	0	0	0	0	0	0	0	0	0	0	0	0	0	0	0	0	0	0	0	0	0	0	0	0	0	0	0	0	0	0	0	0	0	0	0
1852190	INS	(GTGGCCTGGCCGAGCAGTTGCGGGTCGACATCG)1→2	relA	coding (1234/2241 nt)		0	0	0	0	0	0	0	0	0	0	0	0	0	0	0	0	0	0	0	0	0	0	0	0	0	0	0	0	0	0	0	0	0	0	0	0	0	0	0	0	0	0	0	0
1852202	SNP	G→T	relA	V416F (GTT→TTT)		0	0	0	0	0	0	0	0	0	0	0	0	0	0	0	0	0	0	0	0	0	0	0	0	1	0	1	0	0	0	0	0	0	0	0	0	0	0	0	0	0	0	0	0
1852230	SNP	C→G	relA	A425G (GCC→GGC)		0	0	0	0	0	0	0	0	0	0	0	0	0	0	0	0	0	0	0	0	0	0	0	0	0	0	0	0	0	0	0	0	0	0	1	0	0	0	0	0	0	0	0	0
1852269	SNP	C→T	relA	A438V (GCC→GTC)		0	0	0	0	0	0	0	0	0	0	0	0	0	0	0	0	0	0	0	0	0	0	0.75	0	0	0	0	0	0	1	1	0	0	0	0	0	0	0	0	0	1	0	0	0
1852271	SNP	T→C	relA	Y439H (TAC→CAC)		0	0	0	0	0	0	0	0	0	0	0	0	0	0	0	0	0	0	0	0	0	0	0	1	0	0	0	0	0	0	0	0	0	0	0	0	0	0	0	0	0	0	0	0
1852280	SNP	C→T	relA	H442Y (CAC→TAC)		0	0	0	0	0	0	0	0	0	0	0	0	0	0	0	0	0	0	0	0	0	0	0	0	0	0	0	0	0	0	0	0	0	0	0	0	0	0	1	0	0	0	0	0
1852305	SNP	G→C	relA	R450P (CGC→CCC)		0	0	0	0	0	0	0	0	0	0	0	0	0	0	0	0	0	0	0	0	0	0	0	0	0	0	0	0	0	0	0	0	0	0	0	0	0	0	0	0	0	0	0	0
2368107	SNP	C→T	gdhB	A294A (GCC→GCT)		0	0	0	0	0	0	0	0	0	0	0	0	0	0	0	0	0	0	0	0	0	0	0	1	0	0	0	0	0	0	0	0	0	0	0	0	0	0	0	0	0	0	0	0
2403077	SNP	G→A	PP_2105	Q10* (CAA→TAA)	Yes	0	0	0	0	0	0	0	0	0	0	0	0	0	0	0	0	0	0	0	0	0	0	0	0	0	0	0	0	0	0	0	0	0	0	1	0	0	0	0	0	0	0	0	0
2467162	SNP	C→T	queF	P3P (CCC→CCT)		0	0	0	0	0	0	0	0	0	0	0	0	0	0	0	0	0	0	0	0	0	0	0	0	0	0	0	0	0	0	0	0	0	0	0	0	0	0	0	0	0	0	0	0
2598565	DEL	(T)7→6	PP_2276, PP_2277	intergenic (+144/‑140)		0	0	0	0	0	0	0	0	0	0	0	0	0	0	0	0	0	0	0	0	0	0	0	0	0	0	0	0	0	0	0	0	0	0	0	0	0	0	0	0	0	0	0	0
2679650	SNP	G→A	PP_2349	M116I (ATG→ATA)		0	0	0	0	0	0	0	0	0	0	0	0	0	0	0	0	0	0	0	0	0	0	0	0	0	0	0	0	0	0	0	0	0	0	0	0	0	0	1	0	0	0	0	0
2951377	SNP	G→C	oguA, PP_2585	intergenic (‑113/+48)		0	0	0	0	0	0	0	0	0.5	0	0	0	0	0	0	0	0	0	0	0	0	0	0	0	0	0	0	0	0	0	0	0	0	0	0	0	0	0	0	0	0	0	0	0
3226018	DEL	Δ12 bp	PP_2827	coding (351‑362/1023 nt)		0	0	0	0	0	0	0	0	0	0	0	0	0	0	0	0	0	0	0	0	0	0	0	0	0	0	0	0	0	0	0	0	0	0	0	0	0	0	0	0	0	0	0	0
3357054	DEL	Δ9,542 bp	PP_2953,PP_2954,PP_5543,PP_2955,PP_2956,PP_2957,grx,PP_2959,PP_2960,PP_2961,PP_2962		Yes	0	0	0	0	0	0	0	0	0	0	0	0	0	0	0	0	0	0	0	0	0	0	0	0	0	0	0	0	0	0	0	0	0	0	0	0	0	0	0	0	0	0	0	0
3866052	INS	+A	PP_3415	coding (870/1020 nt)	Yes	0	0	0	0	0	0	0	0	0	0	0	0	0	0	0	0	0	0	0	0	0	0	0	0	0	0	0	0	0	0	0	0	0	0	0	0	0	0	0	0	0	0	0	1
3866612	DEL	Δ6 bp	PP_3415	coding (305‑310/1020 nt)		0	0	0	0	0	0	0	0	0	0	0	0	0	0	0	0	0	0	0	0	0	0	0	0	0	0	0	0	0	0	0	0	0	0	0	0	0	0	0	0	0	0	0	0
3866735	DEL	Δ8 bp	PP_3415	coding (180‑187/1020 nt)	Yes	0	0	0	0	0	0	0	0	0	0	0	0	0	0	0	0	0	0	0	0	0	0	0	0	0	0	0	0	0	0	0	0	0	0	0	0	0	0	0	0	0	0	0	0
3866854	SNP	A→C	PP_3415	V23G (GTT→GGT)		0	0	0	0	0	0	0	0	0	0	0	0	0	0	0	0	0	0	0	0	0	0	0	0	0	0	0	0	0	0	0	0	0	0	0	0	0	0	0	0	0	0	0.54	0
4635455	INS	(TATAGCGCTGGCCGGCAAAGGCCAGAC)1→2	uvrY	coding (347/639 nt)		0	0	0	0	0	0	0	0	0	0	0	0	0	0	0	0	0	0	0	0	0	0	0	0	0	0	0	0	0	0	0	0	0	0	0	0	0	0	0	0	0	0	0	0
4635557	SNP	G→A	uvrY	T82M (ACG→ATG)		0	0	0	0	0	0	0	0	0	0	0	0	0	0	0	0	0	0	0	0	0	0	0	0	0	0	0	0	0	0	0	0	0	0	0	0	0	0	0	0	0	0	0	0
4635810	SNP	C→A	uvrY, PP_4100	intergenic (‑9/+55)		0	0	0	0	0	0	0	0	0	0	0	0	0	0	0	0	0	0	0	0	0	0	0.64	0	0	0	0	0	0	0	0	0	0	0	0	0	0	0	0	0	0	0	0	0
4712205	INS	(CGGTGGACTGGAGCGACATCCCCTTGGCCA)1→2	PP_4171	coding (391/2115 nt)		0	0	0	0	0	0	0	0	0	0	0	0	0	0	0	0	0	0	0	0	0	0	0	0	0	0	1	0	0	0	0	0	0	0	0	0	0	0	0	0	0	0	0	0
4713585	SNP	A→C	PP_4171	T591P (ACC→CCC)		0	0	0	0	0	0	0	0	0	0	0	0	0	0	0	0	0	0	0	0	0	0	0	0	0	0	0	0	0	0	0	0	0	1	0	0	0	0	0	0	0	0	0	0
4715246	DEL	Δ48 bp	PP_4173	coding (431‑478/1932 nt)		0	0	0	0	0	0	0	0	0	0	0	0	0	0	0	0	0	0	0	0	0	0	0	0	0	0	0	0	0	0	0	0	0	0	0	0	0	0	1	0	0	0	0	0
4717873	SNP	G→A	fabB	R131H (CGC→CAC)		0	0	0	0	0	0	0	0	0	0	0	0	0	0	0	0	0	0	0	0	0	0	0.85	0	0	0	0	0	0	0	0	0	0	0	0	0	0	0	0	0	0	0	0	0
4947413	SNP	C→G	fliQ	*90S (TGA→TCA)		0	0	0	0	0	0	0	0	0	0	0	0	0	0	0	0	0	0	0	0	0	0	0	0	0	0	0	0	0	0	0	0	0	0	0	0	0	0	0	0	0	0	0	0
4948680	DEL	Δ1 bp	fliO	coding (213/435 nt)		0	0	0	0	0	0	0	0	0	0	0	0	0	0	0	0	0	0	0	0	0	0	0	0	0	0	0	0	0	0	0	0	0	0	0	0	0	0	0	0	0	0	0	0
4964155	DEL	Δ1 bp	fleQ	coding (1248/1476 nt)	Yes	0	0	0	0	0	0	0	0	0	0	0	0	0	0	0	0	1	1	1	0	0	0	0	0	0	0	0	0	0	0	0	0	0	0	0	0	0	0	0	0	0	0	0	0
4964640	SNP	G→A	fleQ	Q255* (CAG→TAG)	Yes	0	0	0	0	0	0	0	1	0	0	0	0	0	0	0	0	0	0	0	0	0	0	0	0	0	0	0	0	0	0	0	0	0	0	0	0	0	0	0	0	0	0	0	0
4964714	SNP	C→G	fleQ	R230P (CGT→CCT)		0	0	0	0	1	0	0	0	0	0	0	0	0	0	0	0	0	0	0	0	0	0	0	0	0	0	0	0	0	0	0	0	0	0	0	0	0	0	0	0	0	0	0	0
4964829	INS	(CGCGGCGCTT)1→2	fleQ	coding (574/1476 nt)	Yes	0	0	1	0	0	0	0	0	0	0	0	0	0	0	0	0	0	0	0	0	0	0	0	0	0	0	0	0	0	0	0	0	0	0	0	0	0	0	0	0	0	0	0	0
4965027	SNP	C→A	fleQ	E126* (GAA→TAA)	Yes	0	0	0	0	0	0	0	0	0	0	0	0	1	0	0	0	0	0	0	0	0	0	0	0	0	0	0	0	0	0	0	0	0	0	0	0	0	0	0	0	0	0	0	0
4978615	INS	(C)8→9	flgH	coding (30/696 nt)	Yes	0	0	0	0	0	0	0	0	0	0	0	0	0	0	0	0	0	0	0	0	0	1	0	0	0	0	0	0	0	0	0	0	0	0	0	0	0	0	0	0	0	0	0	0
4982722	SNP	G→A	flgD	T3I (ACC→ATC)		0	0	0	0	0	0	0	0	0	0	0	0	0	0	0	0	0	0	0	0	0	0	0	0	0	0	0	0	0	0	0	0	0	0	0	0	0	0	0	0	0	0	0	0
5222953	SNP	G→C	PP_4602, PP_4603	intergenic (‑316/+63)		0	0	0	0	0	0	0	0	0	0	0	0	0	0	0	0	0	0	0	0	0	0	0	0	0	0	0	0	0	0	0	0	0.62	0	0	0	0	0	0	0	0	0	0	0
5337301	SNP	G→A	PP_4696	G235R (GGG→AGG)		0	0	0	0	0	0	0	0	0	0	0	0	0	0	0	0	0	0	0	0	0	0	0	0	0	0	0	0	0	0	0	0	0	0	0	0	0	0	0	0	0	0	0	0
5378332	INS	+A	grpE, recN	intergenic (‑61/‑132)		0	0	0	0	0	0	0	0	0	0	0	0	0	0	0	1	0	0	0	0	0	0	0	0	0	0	0	0	0	0	0	0	0	0	0	0	0	0	0	0	0	0	0	0
5478431	SNP	C→T	PP_4815	V45I (GTA→ATA)		0	0	0	0	0	0	0	0	0	0	0	0	0	0	0	0	0	0	0	0	0	0	0	0	0	0	0	0	0	0	0	0	0	0	0	0	0	1	0	0	0	0	0	0
5564387	SNP	C→A	hfq	V62L (GTA→TTA)		0	0	0	0	0	0	0	0	0	0	0	0	0	0	0	0	0	0	0	0	0	0	0	0	0	0	0	0	0	0	0	0	0	0	0	0	0	0	0	0	0	0	0	0
5609896	SNP	G→A	PP_4929	R224C (CGT→TGT)		0	0	0	0	0	0	0	0	0	0	0	0	0	0	0	0	0	0	0	0	0	0	0	0	0	0	0	0	0	0	0	0	0	0	0	0	0	0	0	0	0	0	0	0
5610036	SNP	A→G	PP_4929	V177A (GTC→GCC)		0	0	0	0	0	0	0	0	0	0	0	0	0	0	0	0	0	0	0	0	0	0	0	0	0	0	0	0	0	0	0	0	0	0	0	0	0	0	0	0	0	0	0	0
5610048	SNP	C→A	PP_4929	S173I (AGC→ATC)		0	0	0	0	0	0	0	0	0	0	0	0	0	0	0	0	0	0	0	0	0	0	0	0	0	0	0	0	0	0	0	0	0	0	0	0	0	0	0	0	0	0	0	0
5610088	SNP	C→A	PP_4929	E160* (GAA→TAA)	Yes	0	0	0	0	0	0	0	0	0	0	0	0	0	0	0	0	0	0	0	0	0	0	0	0	0	0	0	0	0	0	0	0	0	0	0	0	0	0	0	0	0	0	0.85	1
5610105	SNP	C→G	PP_4929	G154A (GGC→GCC)		0	0	0	0	0	0	0	0	0	0	0	0	0	0	0	0	0	0	0	0	0	0	0	0	0	0	0	0	0	0	0	0	0	0	0	0	0	0	0	0	0	0	0	0
5610405	SNP	A→C	PP_4929	V54G (GTC→GGC)		0	0	0	0	0	0	0	0	0	0	0	0	0	0	0	0	0	0	0	0	0	0	0	0	0	0	0	0	0	0	0	0	0	0	0	0	0	0	0	0	1	0	0	0
5610450	SNP	G→A	PP_4929	S39L (TCG→TTG)		0	0	0	0	0	0	0	0	0	0	0	0	0	0	0	0	0	0	0	0	0	0	0	0	0	0	0	0	0	0	0	0	0	0	0	0	0	0	0	0	0	0	0	0
5610676	SNP	G→A	emrE	E14K (GAA→AAA)		0	0	0	0	0	0	0	0	0	0	0	0	0	0	0	0	0	0	0	0	0	0	0	0	0	0	0	0	0	0	0	0	0	0	0	0	0	0	0	0	0	0	0	0
5610686	SNP	C→A	emrE	A17D (GCC→GAC)		0	0	0	0	0	0	0	0	0	0	0	0	0	0	0	0	0	0	0	0	0	0	0	0	0	0	0	0	0	0	0	0	0	0	0	0	0	0	0	0	0	1	0	0
5610732	INS	+CTGCTG	emrE	coding (96/333 nt)		0	0	0	0	0	0	0	0	0	0	0	0	0	0	0	0	0	0	0	0	0	0	0	0	0	0	0	0	0	0	0	0	0	0	0	0	0	0	0	0	0	0	0	0
5610742	INS	+A	emrE	coding (106/333 nt)	Yes	0	0	0	0	0	0	0	0	0	0	0	0	0	0	0	0	0	0	0	0	0	0	0	0	0	0	0	0	0	0	0	0	0	0	0	0	0	0	0	0	0	0	0	0
5610767	SNP	T→C	emrE	F44S (TTC→TCC)		0	0	0	0	0	0	0	0	0	0	0	0	0	0	0	0	0	0	0	0	0	0	0	0	0	0	0	0	0	0	0	0	0	0	0	0	0	0	0	0	0	0	0	0
5656397	SNP	A→C	tktA	L450R (CTG→CGG)		0	0	0	0	0	0	0	0	0	0	0	0	0	1	0	0	0	0	0	0	0	0	0	0	0	0	0	0	0	0	0	0	0	0	0	0	0	0	0	0	0	0	0	0
5656409	SNP	C→T	tktA	R446H (CGC→CAC)		0	0	0	0	1	0	0	0	0	0	0	0	0	0	0	0	0	0	0	0	0	0	0	0	0	0	0	0	0	0	0	0	0	0	0	0	0	0	0	0	0	0	0	0
5656850	SNP	C→A	tktA	G299V (GGT→GTT)		0	0	0	0	0	0	0	0	0	0	0	0	1	0	0	0	0	0	0	0	0	0	0	0	0	0	0	0	0	0	0	0	0	0	0	0	0	0	0	0	0	0	0	0
5657310	INS	+GACGAT	tktA	coding (436/1998 nt)		0	0	0	0	0	0	0	0	0.51	0	0	0	0	0	0	0	0	0	0	0	0	0	0	0	0	0	0	0	0	0	0	0	0	0	0	0	0	0	0	0	0	0	0	0
5912914	SNP	G→A	spuI	E43K (GAG→AAG)		0	0	0	0	0	0	0	0	0	0	0	0	0	0	0	0	0	0	0	0	0	0	0	0	0	0	0	0	0	0	0	0	0	0	0	0	0	0	0	0	0	0	0	0
5912986	DEL	Δ42 bp	spuI	coding (199‑240/1377 nt)		0	0	0	0	0	0	0	0	0	0	0	0	0	0	0	0	0	0	0	0	0	0	0	0	0	0	0	0	0	0	0	0	0	0	0	0	0	0	0	0	0	0	0	0
5914046	INS	+A	spuI	coding (1259/1377 nt)		0	0	0	0	0	0	0	0	0	0	0	0	0	0	0	0	0	0	0	0	0	0	0	0	0	0	0	0	0	0	0	0	0	0	0	0	0	0	0	0	0	0	0	0
6070587	SNP	A→G	PP_5324	G38G (GGT→GGC)		0	0	0	0	0	0	0	0	0	0	0	0	0	0	0	0	0	0	0	0	0	0	0	0	0	0	0	1	1	0	0	0	0	0	0	1	1	0	0	0	0	0	0	0
6079809	INS	(TGTCGCCGGCGGCCG)1→2	PP_5351	coding (167/399 nt)		0	0	0	0	0	0	0	0	0	0	0	0	0	0	0	0	0	0	0	0	0	0	0	0	0	0	0	0	0	0	0	0	0	0	0	0	0	0	0	0	0	0	0	0
6098326	DEL	(CAAGCTGCG)2→1	PP_5350	coding (811‑819/867 nt)		0	0	0	0	0	0	0	0	0	0	0	0	0	0	0	0	0	0	0	1	1	1	0	1	1	1	1	0.65	1	0	0	0	1	1	1	1	1	1	1	0	0	0	0	0
6098944	DEL	(CTTCAG)2→1	PP_5350	coding (196‑201/867 nt)		0	0	0	0	0	0	0	0	0	0	0	0	0	0	0	0	0	0	0	0	0	0	0.67	0	0	0	0	0	0	1	1	0	0	0	0	0	0	0	0	0	0	0	0	0
6180715	SNP	A→T	atpB	I263N (ATC→AAC)		0	0	0	0	0	0	0	0	0	0	0	0	0	0	0	0	0	0	0	0	0	0	0	0	0	0	0	0	0	0	0	0	0	0	0	0	0	0	0	0	0	0	0	0
6180730	SNP	C→G	atpB	W258S (TGG→TCG)		0	0	0	0	0	0	0	0	0	0	0	0	0	0	0	0	0	0	0	0	0	0	0	0	0	0	0	0	0	0	0	0	0	0	0	0	0	0	0	0	0	0	0	0
[truncated: 24 more columns]
