# Supplementary material for: Generation of ionic liquid tolerant Pseudomonas putida KT2440 strains via adaptive laboratory evolution
Source: Royal Society of Chemistry journal article supplement (doi:10.1039/d0gc01663b), 2020-01-01
Supplement: d0gc01663b4.xlsx [file d0gc01663b4.xlsx]

## Sheet: Triethanolamine acetate
Locus_tag	Gene name	Description	baseMean	log2FC	ABS(log2FC)	pvalue	padj	COG
PP_0372	aruC	Acetylornithine aminotransferase 2	2139.57	8.05638	8.05638	8.7736e-155	1.48712e-151	E
PP_4488		conserved exported protein of unknown function	177.669	7.79354	7.79354	3.55035e-42	1.80535e-39
PP_4557		conserved exported protein of unknown function	83.8493	7.47253	7.47253	7.59296e-36	3.21752e-33
PP_0269		putative Glutamate synthase, large subunit	680.713	6.74478	6.74478	1.77384e-168	4.51e-165	E
PP_1266		putative Fusaric acid resistance protein	422.142	6.35681	6.35681	7.63765e-113	9.70937e-110	V
PP_1264		putative Fusaric acid resistance protein	231.761	5.83045	5.83045	2.42078e-94	2.05162e-91	S
PP_2222		conserved protein of unknown function	5.74182	5.64909	5.64909	1.84465e-06	3.97459e-05
PP_5458		conserved exported protein of unknown function	416.731	5.59683	5.59683	2.4843e-18	6.31633e-16
PP_1263		putative Fusaric acid resistance protein	667.941	5.55	5.55	1.26927e-175	6.45425e-172	MU
PP_1743	actP-I	acetate permease	1718.6	-4.28542	4.28542	3.74148e-05	0.000503776	R
PP_2035	benE-I	benzoate transport protein	103.293	-4.13298	4.13298	1.43447e-16	3.17144e-14	Q
PP_3164	benD	1,6-dihydroxycyclohexa-2,4-diene-1-carboxylate dehydrogenase	17.263	-3.86643	3.86643	1.21588e-05	0.000194426	IQR
PP_2037		putative Aldolase	292.332	-3.84133	3.84133	1.06877e-13	1.34077e-11	G
PP_1559		Holin	5.69338	3.76536	3.76536	0.00448477	0.0233898
PP_3577	fecI	RNA polymerase, sigma 19 factor	18.2649	3.61124	3.61124	8.86201e-08	2.88868e-06	K
PP_3163	benC	benzoate 1,2-dioxygenase electron transfer	43.5788	-3.44298	3.44298	5.04739e-09	2.29161e-07	HC
PP_0883	opdP	glycine-glutamate dipeptide porin	808.421	-3.4186	3.4186	9.32015e-40	4.30845e-37
PP_0799	opdC	histidine-specific outer membrane porin D	1062.9	3.37463	3.37463	1.98994e-98	2.02377e-95
PP_2036		putative 4-hydroxy-tetrahydrodipicolinate synthase	688.595	-3.34824	3.34824	1.35528e-11	1.16806e-09	EM
PP_3180		Smp-30	718.973	3.15042	3.15042	5.45737e-62	3.96439e-59	G
PP_1742	yjcH	conserved inner membrane protein of unknown	66.0927	-3.14169	3.14169	0.000852435	0.00635577	S
PP_3161	benA	benzoate 1,2-dioxygenase subunit alpha	165.831	-3.10474	3.10474	2.98018e-16	6.06169e-14	PR
PP_4561	csbD	stress response protein	14.1122	3.07387	3.07387	3.25053e-06	6.43149e-05	S
PP_2034		conserved membrane protein of unknown function	79.4921	-3.06707	3.06707	3.61355e-10	2.26851e-08	G
PP_0241		Transporter	20.9506	3.05636	3.05636	4.29637e-08	1.54943e-06	H
PP_3265	ybhP-I	putative phosphohydrolase of unknown function	5.93601	2.98741	2.98741	0.00161838	0.0105266	R
PP_1562		putative Phage terminase, small subunit	22.7636	2.97769	2.97769	2.8284e-05	0.000397304
PP_3822		Cytochrome c family protein	1193.19	-2.91582	2.91582	6.70566e-10	3.91934e-08	C
PP_5307	exbD	TonB-gated outer membrane transporter - gating	381.238	2.9009	2.9009	6.88526e-30	2.69319e-27	U
PP_1947		conserved protein of unknown function	9.92055	-2.83774	2.83774	0.00294259	0.0169842	E
PP_5211		ChaC-related protein	757.326	2.81589	2.81589	2.74661e-54	1.74582e-51	P
PP_1632		conserved protein of unknown function	16.203	2.75481	2.75481	2.13561e-05	0.000316468
PP_0703		putative Transmembrane sensor	85.7929	2.74833	2.74833	1.80062e-09	9.34299e-08	PT
PP_3377	kguT	2-ketogluconate transporter, putative	874.025	-2.72491	2.72491	6.90371e-05	0.00082214	G
PP_1569		conserved protein of unknown function	40.8879	2.70791	2.70791	2.77685e-08	1.06972e-06
PP_3799		conserved exported protein of unknown function	51.8078	2.63009	2.63009	7.67536e-14	1.02708e-11
PP_4433		Amino acid MFS transporter	15.5007	-2.59626	2.59626	0.00339328	0.018899	G
PP_0884	dppA-II	dipeptide ABC transporter - periplasmic binding	627.561	-2.57573	2.57573	7.91966e-05	0.000917345	E
PP_3085		putative Transmembrane sensor	38.6627	2.57331	2.57331	3.11378e-08	1.18412e-06	PT
PP_0351		putative Transmembrane sensor protein	95.6544	2.52552	2.52552	5.97771e-15	9.21111e-13	PT
PP_2498		conserved protein of unknown function	7.17462	2.52182	2.52182	0.00286247	0.0167306	D
PP_2580		conserved protein of unknown function	6.27235	2.52149	2.52149	0.000372327	0.00325307
PP_5665		putative microcin B17-like protein, McbA family	21.4947	-2.51269	2.51269	8.254e-06	0.000138979
PP_3615		conserved protein of unknown function	19.9437	-2.49166	2.49166	0.000276336	0.00257258
PP_3162	benB	benzoate 1,2-dioxygenase subunit beta	23.0682	-2.48169	2.48169	4.37943e-06	8.06863e-05	Q
PP_0234	oprE	outer-membrane porin E	8129.25	-2.47922	2.47922	0.000200443	0.00200803
PP_2192		putative RNA polymerase sigma-70 factor, ECF	181.063	2.45088	2.45088	3.57965e-21	1.2135e-18	PT
PP_3576		putative Transmembrane sensor	34.3702	2.4483	2.4483	1.68791e-06	3.66795e-05	PT
PP_0861		outer membrane ferric siderophore receptor	76.6874	2.44343	2.44343	1.08105e-13	1.34077e-11	P
PP_5475		conserved protein of unknown function	21.1082	2.42635	2.42635	3.54706e-06	6.83213e-05
PP_3798		conserved protein of unknown function	63.7524	2.38915	2.38915	3.53471e-13	4.085e-11
PP_2581		conserved protein of unknown function	20.8767	2.35907	2.35907	1.15254e-05	0.000186052
PP_0536		conserved protein of unknown function	222.664	2.32571	2.32571	1.38697e-14	2.07434e-12
PP_4607		putative Transmembrane sensor	58.1457	2.31141	2.31141	1.04934e-08	4.52194e-07	PT
PP_1568		conserved protein of unknown function	24.8565	2.29774	2.29774	4.99826e-06	8.94935e-05
PP_0180		putative cytochrome c family protein	439.406	2.29586	2.29586	7.66435e-19	2.43583e-16	P
PP_4070		conserved protein of unknown function	128.766	2.29173	2.29173	3.45036e-08	1.25322e-06	PT
PP_1070	gltJ	glutamate	727.529	-2.28175	2.28175	4.26212e-10	2.61119e-08	E
PP_0668		putative Transmembrane sensor	74.3222	2.26488	2.26488	1.48914e-10	1.00964e-08	PT
PP_0350		Outer membrane ferrichrome-iron receptor	67.5008	2.26176	2.26176	9.65893e-09	4.23411e-07	P
PP_3494		conserved exported protein of unknown function	54.1571	2.25154	2.25154	0.00137429	0.00921478
PP_4655	pcaG	protocatechuate 3,4-dioxygenase alpha chain	137.891	-2.22481	2.22481	2.27289e-06	4.75623e-05	Q
PP_0544		Ethanolamine transporter	107.879	-2.21093	2.21093	6.17101e-12	6.03454e-10	E
PP_3537	pobA	p-hydroxybenzoate hydroxylase	95.0573	-2.2053	2.2053	1.60839e-06	3.54054e-05	HC
PP_3155		putative Outer membrane ferric siderophore	307.912	2.17844	2.17844	1.77094e-11	1.47627e-09	P
PP_3522		conserved protein of unknown function	22.3256	-2.1757	2.1757	4.47987e-06	8.20526e-05	J
PP_0862		PKHD-type hydroxylase PP_0862	59.525	2.17264	2.17264	2.58065e-08	1.00943e-06	S
PP_2446		conserved exported protein of unknown function	5.87555	2.16841	2.16841	0.00589685	0.0289715
PP_1016	gtsB	mannose	1112.78	-2.16028	2.16028	2.2262e-05	0.000327174	G
PP_1574		conserved protein of unknown function	80.4956	2.15298	2.15298	4.85216e-08	1.73755e-06
PP_0545	aldB-I	aldehyde dehydrogenase	19043.9	-2.13844	2.13844	1.41161e-15	2.3155e-13	C
PP_1578		conserved protein of unknown function	56.5674	2.13486	2.13486	3.59542e-09	1.72478e-07
PP_3929		conserved protein of unknown function	27.9755	2.13385	2.13385	0.000620329	0.00496752
PP_1019	oprB-I	carbohydrate-selective porin	9009.55	-2.13117	2.13117	2.41883e-06	4.99989e-05	M
PP_2118		conserved protein of unknown function	30.6265	2.12192	2.12192	0.00104649	0.00746175
PP_5423		conserved membrane protein of unknown function	74.6716	-2.11767	2.11767	3.75447e-09	1.75153e-07
PP_4217	fpvA	outer membrane ferripyoverdine receptor FpvA,	4962.86	2.11321	2.11321	4.76979e-05	0.000601846	P
PP_0882	dppA-I	dipeptide ABC transporter - periplasmic binding	1074.42	-2.11294	2.11294	2.03896e-16	4.32005e-14	E
PP_4461		Major facilitator family transporter	25.3377	-2.10544	2.10544	0.00198667	0.0123801	GEPR
PP_3804		conserved exported protein of unknown function	353.719	2.08879	2.08879	7.52116e-14	1.02708e-11	P
PP_2851		conserved protein of unknown function	56.6622	2.08046	2.08046	2.9161e-10	1.85355e-08	S
PP_0667		RNA polymerase sigma-70 factor, ECF subfamily	98.3536	2.07796	2.07796	3.84246e-10	2.3828e-08	K
PP_1017	gtsC	mannose	1523.62	-2.06493	2.06493	2.27685e-08	9.1887e-07	G
PP_1565		Phage portal protein, HK97 family	237.045	2.05682	2.05682	2.56285e-13	3.03072e-11	S
PP_1206	oprD	basic-amino-acid specific porin OprD	17165	-2.0511	2.0511	7.5765e-47	4.28072e-44
PP_2506		conserved membrane protein of unknown function	18.9179	-2.04825	2.04825	0.000227891	0.00220729
PP_0704		RNA polymerase sigma-70 factor, ECF subfamily	57.1855	2.03513	2.03513	1.31559e-07	4.05441e-06	K
PP_3166	catA-II	catechol 1,2-dioxygenase	30.4394	-2.01734	2.01734	6e-06	0.000105207	Q
PP_3800		conserved protein of unknown function	63.3092	2.01421	2.01421	3.71876e-06	7.02971e-05
PP_1584		conserved protein of unknown function	35.8883	2.01209	2.01209	4.98955e-05	0.000628016
PP_3802		putative Cation ABC transporter, ATP-binding	137.595	1.99789	1.99789	1.47767e-11	1.25232e-09	P
PP_3325		putative Outer membrane ferric siderophore	176.751	1.9604	1.9604	1.40215e-06	3.15483e-05	P
PP_2010		Cytochrome b561	462.574	-1.95257	1.95257	1.95323e-18	5.22747e-16	C
PP_1576		putative Immunity protein	239.966	-1.95222	1.95222	2.54466e-11	2.05391e-09
PP_1571		conserved protein of unknown function	46.3104	1.95181	1.95181	3.52954e-07	9.54666e-06
PP_5549		conserved protein of unknown function	9.56231	1.94963	1.94963	0.00176771	0.0113638
PP_1573		putative Major tail protein	118.771	1.94037	1.94037	1.4159e-07	4.33726e-06
PP_1651		two-component response regulator	137.903	1.93442	1.93442	4.23343e-07	1.12317e-05	TK
PP_0271	gltR-I	DNA-binding response regulator	66.535	1.93336	1.93336	3.13051e-07	8.58293e-06	TK
PP_4523		putative Agmatinase	12.8991	-1.91954	1.91954	0.00923994	0.0411428	E
PP_0270		Sensor histidine kinase	39.8401	1.91833	1.91833	5.73156e-05	0.000703985	T
PP_1567		Capsid protein	706.674	1.90313	1.90313	1.14659e-12	1.18988e-10
PP_1652	pfeS-II	histidine kinase	86.0549	1.88399	1.88399	1.62662e-06	3.56524e-05	T
PP_2224		conserved protein of unknown function	7.89548	1.87882	1.87882	0.00207584	0.0128727
PP_1583		putative Structural protein P5	61.2062	1.87168	1.87168	1.09335e-07	3.42322e-06
PP_4851		Phosphate starvation-inducible protein, PSIF	538.366	-1.86803	1.86803	1.74147e-15	2.76731e-13
PP_2453	ansB	Glutaminase-asparaginase	1612.18	-1.86784	1.86784	0.00370155	0.0202174	EJ
PP_5306	exbB	Biopolymer transport protein ExbB	610.238	1.86414	1.86414	1.99092e-08	8.16436e-07	U
PP_4625	cidB	anti-holin regulator of holin CidA	23.4896	1.86081	1.86081	3.48434e-05	0.00047501	M
PP_3823		Cytochrome c-type protein	413.342	-1.85413	1.85413	8.50331e-10	4.69993e-08	C
PP_3704		conserved protein of unknown function	276.779	1.85377	1.85377	8.05833e-08	2.66082e-06
PP_4538	azoR2	FMN-dependent NADH-azoreductase 2	20.2419	-1.84932	1.84932	0.00093332	0.00679933	I
PP_0352		RNA polymerase sigma-70 factor, ECF subfamily	54.0782	1.83649	1.83649	1.67458e-07	5.06858e-06	K
PP_3801		putative Cation ABC transporter, periplasmic	269.616	1.83076	1.83076	1.51072e-10	1.01079e-08	P
PP_1042	xcpX	Type II secretion system protein K	11.4809	1.82561	1.82561	0.00767213	0.0359565	U
PP_1566		Peptidase U35	114.857	1.82406	1.82406	2.60534e-09	1.32482e-07	R
PP_4556		conserved protein of unknown function	38.9073	1.82015	1.82015	9.49183e-07	2.25542e-05	S
PP_2435	iscS-II	cysteine desulfurase	47.5888	1.82003	1.82003	1.55865e-09	8.17087e-08	E
PP_3376	ptxD	putative phosphonate dehydrogenase	2404.2	-1.81746	1.81746	1.85471e-07	5.54777e-06	CHR
PP_3807		Thioesterase	218.116	1.81563	1.81563	9.90348e-12	9.15622e-10	Q
PP_5308	tonB	Protein TonB	205.36	1.81124	1.81124	3.1607e-08	1.18412e-06	M
PP_1579		conserved protein of unknown function	533.417	1.81053	1.81053	4.99099e-10	3.02133e-08
PP_0161		putative transmembrane sensor	71.7238	1.79695	1.79695	7.9223e-07	1.91833e-05	PT
PP_5377		conserved hypothetical protein	211.208	-1.79133	1.79133	6.79861e-12	6.52282e-10	R
PP_4866	braD	High-affinity branched-chain amino acid	217.891	-1.78937	1.78937	9.61303e-07	2.27359e-05	E
PP_0056	betA-I	choline dehydrogenase	120.249	1.78352	1.78352	9.27023e-06	0.000153049	E
PP_4838	oprC	Outer membrane copper receptor OprC	56.724	1.78174	1.78174	7.1408e-11	5.04319e-09	P
PP_3229		putative Periplasmic aliphatic sulfonate-binding	8.30205	1.77859	1.77859	0.005871	0.0289003	P
PP_5610		protein of unknown function	92.5777	-1.7751	1.7751	3.03204e-11	2.33605e-09
PP_2842	ureD	urease accessory protein	7.40929	1.77359	1.77359	0.00554919	0.0275294	O
PP_0162		RNA polymerase sigma-70 factor, ECF subfamily	27.133	1.77009	1.77009	0.000124206	0.00133528	K
PP_2562		conserved protein of unknown function	18.8596	1.76714	1.76714	0.000225408	0.00219287	Q
PP_3553		AMP-binding domain protein	90.5066	-1.76485	1.76485	0.00522942	0.0264067	IQ
PP_2424		putative 2'-5' RNA ligase	136.205	1.75084	1.75084	3.51532e-06	6.79672e-05	J
PP_4604		putative permease of the drug	228.835	1.74932	1.74932	3.65686e-06	6.99065e-05	GER
PP_1006		putative outer membrane heme receptor	241.652	1.74597	1.74597	1.56952e-06	3.48515e-05	P
PP_0880	dppC	dipeptide ABC transporter - putative membrane	139.589	-1.73377	1.73377	1.1061e-10	7.7048e-09	EP
PP_1577		Phage tail tape meausure protein, lambda family	597.139	1.73186	1.73186	1.30418e-11	1.14341e-09	S
PP_0481	katA	Catalase	3739.89	-1.72821	1.72821	9.97477e-16	1.81149e-13	P
PP_5702		conserved protein of unknown function	167.59	1.72676	1.72676	6.76371e-11	4.84415e-09
PP_0216		putative sensory box	143.185	1.72007	1.72007	1.96308e-10	1.27978e-08	T
PP_1716		Transcriptional regulator, Cro	812.819	1.71913	1.71913	1.49277e-08	6.23428e-07	K
PP_0700		putative Transmembrane sensor	87.5237	1.7177	1.7177	5.06112e-08	1.78721e-06	PT
PP_1035	tadA	tRNA-specific adenosine deaminase monomer	40.5279	1.68167	1.68167	8.08903e-07	1.94486e-05	FJ
PP_3417	gntT	D-gluconate transporter	3874.2	-1.6761	1.6761	0.000324276	0.00290819	GE
PP_0295	cbcW	choline	257.062	-1.67182	1.67182	3.19037e-11	2.42135e-09	E
PP_0221		methionine ABC transporter periplasmic-binding	10.9304	1.67068	1.67068	0.0063531	0.0306504	P
PP_0647		conserved membrane protein of unknown function	22.6352	-1.67001	1.67001	0.000827953	0.00620051
PP_1950		conserved protein of unknown function	42.9219	-1.65155	1.65155	0.0053844	0.0268956	Q
PP_0881	dppB	dipeptide ABC transporter - putative membrane	214.956	-1.63994	1.63994	8.78281e-09	3.88353e-07	EP
PP_1297	yhdW	putative amino-acid ABC transporter-binding	389.353	-1.63924	1.63924	0.00128721	0.00879755	ET
PP_1076	glpF	aquaglyceroporin	68.3372	-1.63808	1.63808	1.73214e-05	0.000267719	G
PP_4168		conserved protein of unknown function	133.874	1.63602	1.63602	5.25297e-08	1.8171e-06
PP_0913		conserved exported protein of unknown function	3414.2	1.63291	1.63291	1.29338e-09	7.07185e-08	P
PP_1701	sugE	transporter	21.0727	1.62817	1.62817	0.00479203	0.0246644	P
PP_3785		conserved protein of unknown function	8316.27	-1.61965	1.61965	4.70966e-12	4.69581e-10
PP_1340	ftsQ	Cell division protein FtsQ	557.22	1.61916	1.61916	5.21434e-07	1.34593e-05	M
PP_4411		conserved protein of unknown function	77.7363	-1.6188	1.6188	1.43845e-09	7.69951e-08
PP_1829		Hydrolase, alpha	20.4051	1.60556	1.60556	0.00782155	0.0364551	R
PP_1009	gapA	glyceraldehyde-3-phosphate dehydrogenase	3251.81	-1.6019	1.6019	3.16697e-08	1.18412e-06	G
PP_0320		Methyl-accepting chemotaxis transducer	134.854	-1.5998	1.5998	4.75527e-06	8.57466e-05	NT
PP_4273		Transcriptional regulator, MerR family	24.7965	1.58571	1.58571	1.81956e-05	0.000280377	K
PP_0200	nfeD	putative membrane bound peptidase, nefD	39.9772	1.58542	1.58542	4.22509e-05	0.00054526	O
PP_2672	exaE	Transcriptional activator protein ExaE	15.2502	1.57437	1.57437	0.00139384	0.00932588	TK
PP_2632	bcsG	putative endoglucanase	24.9468	-1.56902	1.56902	0.00161884	0.0105266
PP_5582		conserved protein of unknown function	709.2	-1.56766	1.56766	2.47615e-07	7.07372e-06
PP_5334		conserved membrane protein of unknown function	76.4482	-1.56265	1.56265	3.95326e-05	0.000523498	S
PP_0199	qmcA	putative membrane protease family, stomatin	50.8099	1.56196	1.56196	1.18661e-08	5.07051e-07	O
PP_0975	hupN	putative DNA-binding protein HU, form N	2424.91	-1.56165	1.56165	1.80646e-10	1.19296e-08	L
PP_3900		hypothetical protein	58.3934	1.56017	1.56017	9.31297e-06	0.000153257
PP_5380	copA-II	copper resistance protein A	1273.98	-1.55761	1.55761	8.2858e-14	1.08034e-11	Q
PP_2252		conserved exported protein of unknown function	20.3358	1.55494	1.55494	0.00030593	0.00276807
PP_1572		conserved protein of unknown function	19.371	1.55467	1.55467	0.00665186	0.03185
PP_4211	ompQ	outer membrane pyoverdine efflux protein	84.7372	1.5544	1.5544	4.31182e-06	7.97294e-05	MU
PP_3783	syrB	syringomycin biosynthesis enzyme 2	11019.2	-1.55344	1.55344	4.73707e-13	5.23652e-11	Q
PP_5477		conserved protein of unknown function	166.342	-1.54432	1.54432	6.9228e-07	1.71719e-05
PP_1155		YaiC	196.873	1.53253	1.53253	1.8034e-18	5.09461e-16	T
PP_2739		putative Sensory box protein	169.42	1.52639	1.52639	3.63347e-06	6.97215e-05	T
PP_5238		conserved protein of unknown function	173.499	-1.52396	1.52396	2.24157e-13	2.7139e-11	S
PP_3954		periplasmic binding subunit of unknown solute	355.26	-1.52309	1.52309	0.00249339	0.0149692	R
PP_5162		conserved exported protein of unknown function	26.4274	-1.52091	1.52091	0.00136149	0.00916975
PP_3837	yphA	inner membrane protein of unknown function	77.9606	-1.52035	1.52035	1.00137e-07	3.18247e-06	S
PP_0885	dppA-III	dipeptide ABC transporter - periplasmic binding	3870.14	-1.51687	1.51687	0.00224742	0.0137357	E
PP_1005	hemO	Heme oxygenase	71.1934	1.51653	1.51653	2.48385e-05	0.000353792	P
PP_5461		protein of unknown function	53.9195	-1.51639	1.51639	0.00183425	0.0116423
PP_3165	benK	benzoate MFS transporter	21.7017	-1.51435	1.51435	0.00231593	0.0140363	G
PP_3268		MutT/nudix family protein	20.9446	1.50823	1.50823	0.000278714	0.00258583	F
PP_5378		putative metal-binding protein	684.368	-1.5082	1.5082	4.78608e-09	2.20422e-07	C
PP_1071	gltI	glutamate	6749.86	-1.50495	1.50495	1.48489e-05	0.000233045	ET
PP_3784		conserved protein of unknown function	8489.21	-1.49952	1.49952	2.96223e-11	2.31738e-09	J
PP_1570		Head-tail adaptor	67.8584	1.49699	1.49699	7.50633e-06	0.000127232	R
PP_2860		putative Nicotinamide mononucleotide	24.9598	-1.49236	1.49236	0.006018	0.0294309	H
PP_5462		conserved protein of unknown function	23.3882	1.4915	1.4915	0.000266924	0.00250426
PP_1018	gtsD	mannose	4682.93	-1.4909	1.4909	1.83432e-05	0.000281798	G
PP_4605		Transcriptional regulator, AraC family	205.613	1.49031	1.49031	9.51585e-13	1.02953e-10	K
PP_4240		putative Microcin b17 processing protein mcbd	41.9623	-1.48766	1.48766	0.000137195	0.00145341
PP_1069	gltK	glutamate	382.691	-1.48254	1.48254	2.28333e-05	0.000332686	E
PP_1946		Oxidoreductase, short chain	40.6259	-1.48056	1.48056	0.00514527	0.0260595	IQR
PP_4244	pvdS	alternative sigma factor	182.094	1.48054	1.48054	0.000149498	0.00156098	K
PP_3984		putative transposase	88.842	1.47941	1.47941	0.00050774	0.00421184
PP_1034	cumA	multicopper oxidase	769.063	1.47478	1.47478	1.19528e-16	2.76273e-14	Q
PP_3788		putative Non-ribosomal peptide synthetase	5035.7	-1.47369	1.47369	3.71527e-14	5.24782e-12	Q
PP_4650	cioB	Ubiquinol oxidase subunit II, cyanide	1407.48	1.47272	1.47272	4.23828e-07	1.12317e-05	C
PP_2099		conserved protein of unknown function	436.628	-1.47224	1.47224	3.69924e-09	1.75153e-07	S
PP_5202		putative cell division protein	330.956	1.47172	1.47172	2.95239e-05	0.000411312	S
PP_4656	pcaH	protocatechuate 3,4-dioxygenase beta chain	129.139	-1.4715	1.4715	0.000513967	0.00424963	Q
PP_2419		conserved membrane protein of unknown function	46.3692	1.46447	1.46447	2.12616e-06	4.4861e-05	S
PP_1956		conserved exported protein of unknown function	59.981	-1.46372	1.46372	3.9289e-05	0.000521631	C
PP_3017	ogt	O6-methylguanine-DNA methyltransferase	63.4525	1.45357	1.45357	7.47332e-05	0.000875618	L
PP_3337		conserved membrane protein of unknown function	94.3851	-1.44531	1.44531	0.000307951	0.0027814
PP_1083		(2Fe-2S)-binding protein	39.8815	1.44274	1.44274	0.000247183	0.00234065	P
PP_1400	kgtP	Alpha-ketoglutarate permease	466.569	-1.42953	1.42953	0.000204938	0.00204335	G
PP_4613	fecA	outer membrane ferric citrate porin	32.2503	1.42566	1.42566	3.79887e-05	0.00050969	P
PP_1955		Cytochrome P450 family protein	32.2118	-1.42425	1.42425	0.00303462	0.0173578	Q
PP_5010		conserved protein of unknown function	111.063	1.41994	1.41994	0.000138132	0.00145425
PP_3267		putative Clp protease	30.2778	1.41805	1.41805	2.14091e-05	0.000316468	OU
PP_0482	bfr-I	bacterioferritin	2457.1	-1.41794	1.41794	2.65673e-08	1.03126e-06	P
PP_1208		conserved protein of unknown function, SlyX	31.1257	1.41684	1.41684	0.000301535	0.00274275	S
PP_3786	aspC	aminotransferase	4170.94	-1.41212	1.41212	2.66715e-09	1.34282e-07	E
PP_1317	petA	Ubiquinol-cytochrome c reductase iron-sulfur	4691.67	-1.40931	1.40931	9.29292e-26	3.37532e-23	C
PP_3827	yrpB	2-nitropropane dioxygenase	427.469	1.40911	1.40911	1.07417e-07	3.39264e-06	R
PP_2766		Long-chain-fatty-acid--CoA ligase-related	18.7274	1.40748	1.40748	0.0048856	0.0250184	I
PP_4208		RNA polymerase sigma-70 factor, ECF subfamily	96.377	1.4072	1.4072	5.56074e-05	0.000689668	K
PP_4221	pvdI	non-ribosomal peptide synthetase (subunit of	1695.35	1.40558	1.40558	6.05062e-05	0.000730817	Q
PP_5382		putative exported protein	50.8083	-1.40395	1.40395	0.00121416	0.00841144
PP_3797		conserved membrane protein of unknown function	342.387	1.40231	1.40231	2.43616e-07	7.02345e-06	S
PP_4610		conserved protein of unknown function containing	207.814	1.40198	1.40198	1.47925e-07	4.5042e-06	S
PP_3444		Glyoxalase family protein	61.1433	1.39656	1.39656	2.32479e-05	0.000336796	S
PP_1140	livH	branched chain amino acid transporter - permease	588.249	-1.39197	1.39197	3.24256e-05	0.000448055	E
PP_0530	ribB	3,4-dihydroxy-2-butanone 4-phosphate synthase	44.3796	1.39135	1.39135	0.000362374	0.00318251	H
PP_3566		Major facilitator family transporter	81.3002	1.38819	1.38819	6.31547e-07	1.58198e-05	G
PP_5450		exported protein of unknown function	136.523	-1.38585	1.38585	1.50831e-09	7.98934e-08
PP_3955		permease	187.376	-1.37333	1.37333	0.00157426	0.0103158	R
PP_1717		conserved protein of unknown function	101.474	1.37257	1.37257	8.0642e-05	0.000927748
PP_5470		conserved protein of unknown function	30.5883	1.36743	1.36743	0.000256765	0.00242236
PP_0156	pntAA	pyridine nucleotide transhydrogenase subunit	1560.41	-1.36473	1.36473	1.09732e-07	3.42322e-06	C
PP_0240	ssuB	Aliphatic sulfonates import ATP-binding protein	19.1848	1.36467	1.36467	0.0115604	0.0492746	P
PP_4167	sixA	Phosphohistidine phosphatase SixA	107.58	1.36412	1.36412	0.000495868	0.00412682	T
PP_1943	purU-III	formyltetrahydrofolate deformylase	37.2262	-1.3635	1.3635	0.000637518	0.00506528	F
PP_1008		RNA polymerase subunit sigma-24	20.2339	1.36	1.36	0.00378775	0.0205855	K
PP_0431		conserved membrane protein of unknown function	99.5713	-1.35763	1.35763	3.83491e-06	7.22242e-05	S
PP_2499		conserved protein of unknown function	318.257	1.35567	1.35567	0.000121652	0.00131059	K
PP_1023	pgl	6-phosphogluconolactonase	2980.45	-1.35466	1.35466	4.27751e-11	3.15234e-09	G
PP_0148		conserved protein of unknown function	106.938	1.35356	1.35356	0.000166038	0.00171606	S
PP_4119	nuoA	NADH-quinone oxidoreductase subunit A	442.36	-1.35344	1.35344	5.81323e-07	1.47066e-05	C
PP_2193		Outer membrane ferric siderophore receptor	94.7049	1.3533	1.3533	8.43762e-06	0.000141136	P
PP_1825		conserved exported protein of unknown function	26.2628	1.35242	1.35242	0.000191165	0.00192109
PP_4606		putative Outer membrane ferric siderophore	60.8021	1.35037	1.35037	7.47705e-06	0.00012716	P
PP_0534		putative Transcriptional regulator PfeR	31.8455	1.34919	1.34919	0.00112427	0.00787016	TK
PP_3749		conserved protein of unknown function	28.0671	1.34338	1.34338	0.00161666	0.0105266
PP_1563		putative Phage terminase, large subunit	402.097	1.34277	1.34277	2.29483e-07	6.66812e-06	R
PP_2848	ureF	urease accessory protein	28.783	1.34005	1.34005	0.00856076	0.0391118	O
PP_1024	eda	KHG/KDPG aldolase	3636.58	-1.33968	1.33968	3.0016e-07	8.29519e-06	G
PP_1479	hicB	HicB protein	98.1324	1.33541	1.33541	1.37686e-06	3.1117e-05	S
PP_2652		putative Hydratase	111.382	-1.33352	1.33352	3.35147e-07	9.11349e-06	Q
PP_5598		conserved protein of unknown function	93.4541	1.33171	1.33171	0.00177886	0.0113958
PP_0645		protein of unknown function	24.908	1.32829	1.32829	0.000791889	0.00597441
PP_3202		putative Transporter	23.5961	1.32716	1.32716	0.00190793	0.0120072	R
PP_3789		putative Efflux transporter	1007.13	-1.32595	1.32595	2.91392e-07	8.09688e-06
PP_4066	liuC	methylglutaconyl-CoA hydratase	55.8605	-1.32443	1.32443	0.00037627	0.00327065	I
PP_0865		ECF subfamily RNA polymerase sigma-24 factor	26.0145	1.32378	1.32378	0.00180712	0.0115298	K
PP_5212		Oxidoreductase, iron-sulfur-binding	347.28	1.31878	1.31878	2.23021e-09	1.14552e-07	HC
PP_4215	pvdO	pyoverdine biosynthesis related protein	135.24	1.3175	1.3175	0.00133283	0.00902455	S
PP_1307		AsnC family transcriptional regulator	20.3482	-1.31732	1.31732	0.00591923	0.0290253	K
PP_5666		putative microcin B17-like processing protein,	47.2319	-1.31599	1.31599	0.000366834	0.00321612
PP_1374		conserved protein of unknown function	43.0146	1.31475	1.31475	0.000225419	0.00219287
PP_4882		Iron ABC transporter, permease protein	358.352	1.313	1.313	3.86683e-11	2.89159e-09	P
PP_1376	pcaK	4-hydroxybenzoate transporter	52.2507	-1.3114	1.3114	0.000468571	0.00395138	G
PP_2463	cspA-II	nucleic acid cold-shock chaperone	354.176	-1.30983	1.30983	5.74726e-05	0.000704212	K
PP_2731		conserved protein of unknown function	38.9384	1.30692	1.30692	0.000406881	0.00349491
PP_3899		conserved protein of unknown function, hicB	72.068	1.30546	1.30546	0.000320505	0.00287945	S
PP_5363		conserved exported protein of unknown function	61.671	1.30326	1.30326	1.99307e-05	0.000298082
PP_0685		conserved protein of unknown function	52.3982	1.3029	1.3029	0.00231925	0.0140397
PP_3612		putative TonB-dependent receptor	133.601	1.30256	1.30256	0.00169613	0.010973	P
PP_0276		Transcriptional regulator, Cro	42.0552	-1.30234	1.30234	0.000469709	0.00395442	S
PP_3125		putative transcriptional regulator (Cro	95.0819	-1.299	1.299	4.65509e-05	0.000590302	K
PP_3781		Oxygen-independent Coproporphyrinogen III	10239.9	-1.29719	1.29719	2.04239e-07	6.06697e-06	H
PP_4608		RNA polymerase sigma-70 factor, ECF subfamily	22.3312	1.29619	1.29619	0.00171383	0.0110594	K
PP_3963		conserved protein of unknown function	279.246	1.29478	1.29478	2.74915e-07	7.72345e-06
PP_3751		putative Cyanate transporter	66.6446	1.29476	1.29476	4.08323e-05	0.000536518	P
PP_0673		conserved protein of unknown function	352.604	1.29257	1.29257	0.000103311	0.00114203
PP_0375		Prolyl oligopeptidase family protein	509.018	1.29217	1.29217	1.22775e-18	3.67242e-16	E
PP_1942		Transcriptional regulator, LysR family	230.422	-1.29034	1.29034	3.99733e-05	0.000526592	K
PP_5002		conserved protein of unknown function	96.9058	-1.28842	1.28842	7.69347e-07	1.88375e-05	S
PP_4870		Azurin	17224.7	-1.28764	1.28764	1.90136e-11	1.55942e-09	C
PP_4308		Transcriptional regulator, AsnC family	54.0455	1.28302	1.28302	0.00170194	0.0109967	K
PP_4946	putP	sodium	434.703	-1.28039	1.28039	7.70543e-07	1.88375e-05	ER
PP_1636	dgkA-I	diacylglycerol kinase	52.8076	1.27991	1.27991	0.000102358	0.00113397	M
PP_2456	rbsC	D-ribose ABC transporter - permease subunit	93.1335	-1.27369	1.27369	0.00647137	0.0311324	G
PP_3808		Antibiotic synthesis protein MbtH	61.2103	1.27363	1.27363	0.00104773	0.00746175	S
PP_1299	yhdY	putative amino acid ABC transporter - membrane	59.1282	-1.27014	1.27014	0.00213274	0.0131614	E
PP_4611		RNA polymerase sigma-70 factor, ECF subfamily	34.5959	1.26843	1.26843	0.00803077	0.0372256	K
PP_3554		Acyl-CoA dehydrogenase family protein	77.4778	-1.26592	1.26592	0.000746571	0.00573461	I
PP_2909	csiD	carbon starvation induced protein	29.3312	-1.26281	1.26281	0.00123875	0.00853531
PP_0686	yjdM	conserved protein of unknown function	140.491	-1.26049	1.26049	2.02276e-05	0.000301634	P
PP_0415	rpe	ribulose-5-phosphate 3-epimerase	1582.86	-1.25712	1.25712	7.90769e-10	4.41875e-08	G
PP_3505		conserved protein of unknown function	45.8519	1.25373	1.25373	8.34686e-05	0.000953793	H
PP_4423		conserved protein of unknown function	94.2576	-1.25179	1.25179	4.60515e-05	0.00058543	R
PP_4756	gabP-V	gamma-aminobutyrate permease	82.0744	-1.24643	1.24643	2.09335e-06	4.43545e-05	E
PP_1306		Pyocin S-type Killer domain protein	65.3646	-1.24617	1.24617	0.00223331	0.0136824
PP_4264	hemN	oxygen-independent coproporphyrinogen III	9151.19	-1.24565	1.24565	4.83341e-06	8.68476e-05	H
PP_4651	cioA	Ubiquinol oxidase subunit I, cyanide	2164.9	1.24354	1.24354	3.89438e-05	0.000518401	C
PP_2250		Transcriptional regulator, LysR family	27.74	-1.24206	1.24206	0.00386455	0.0209056	K
PP_0378	pqqC	Pyrroloquinoline-quinone synthase	224.071	1.24061	1.24061	1.43667e-08	6.08787e-07	H
PP_0201		conserved protein of unknown function	524.518	1.23922	1.23922	4.48586e-06	8.20526e-05	S
PP_3790		diaminopimelate epimerase	1136.45	-1.23432	1.23432	7.50543e-10	4.28822e-08	E
PP_1141	livK	branched-chain amino acids ABC transporter -	4327.91	-1.22964	1.22964	0.000919558	0.00672799	E
PP_0261	cysQ	adenosine-3'(2'),5'-bisphosphate nucleotidase	220.62	1.22711	1.22711	7.34293e-08	2.44044e-06	P
PP_5348		Transcriptional regulator, LysR family	62.5869	-1.22409	1.22409	0.000140499	0.00147611	K
PP_5379	copB-II	copper resistance protein B	894.831	-1.22313	1.22313	9.20206e-12	8.66527e-10	P
PP_4426		Amino acid ABC transporter, permease protein	57.0841	-1.22203	1.22203	0.00470223	0.024275	E
PP_0249		conserved protein of unknown function	182.365	-1.22059	1.22059	3.56287e-09	1.72478e-07	O
PP_4073		conserved exported protein of unknown function	46.3619	-1.2199	1.2199	0.000482327	0.00404725
PP_1022	zwfA	glucose 6-phosphate-1-dehydrogenase	9456.57	-1.21784	1.21784	2.01568e-08	8.1998e-07	G
PP_0998		conserved protein of unknown function	2539.36	-1.21637	1.21637	1.02094e-12	1.08156e-10
PP_2946	arfB	peptidyl-tRNA hydrolase, ribosome rescue factor	74.8859	1.21563	1.21563	7.0851e-08	2.37025e-06	J
PP_4218		Lipase	120.526	1.21415	1.21415	0.00100439	0.00721372	I
PP_2558		putative Outer membrane efflux protein	80.2561	1.208	1.208	3.33431e-06	6.54026e-05	MU
PP_1068	gltL	glutamate	1138.71	-1.20758	1.20758	8.64619e-05	0.000981381	E
PP_0908		conserved exported protein of unknown function	312.894	1.2058	1.2058	5.66565e-11	4.11569e-09	S
PP_1082	bfr-II	bacterioferritin	5031.45	-1.20571	1.20571	5.93214e-06	0.000104377	P
PP_4010	cspD	DNA replication inhibitor	320.995	-1.20347	1.20347	0.000215054	0.00211929	K
PP_0815	cyoD	cytochrome bo terminal oxidase subunit IV	481.253	1.19881	1.19881	1.85347e-05	0.000283882	C
PP_0328	fdhA	formaldehyde dehydrogenase	126.765	-1.19578	1.19578	6.3653e-06	0.000110848	ER
PP_0146	ygdQ	putative transport protein	229.09	-1.19514	1.19514	2.63237e-07	7.478e-06	P
PP_2745		Universal stress protein family	461.594	1.19054	1.19054	4.50503e-07	1.18083e-05	T
PP_5361		47 kDa protein	266.238	1.18738	1.18738	5.59947e-07	1.43805e-05	R
PP_3803		putative Cation ABC transporter, permease	131.026	1.18534	1.18534	1.53572e-06	3.42507e-05	P
PP_0681		conserved protein of unknown function	54.1785	1.18528	1.18528	3.68445e-05	0.000500948
PP_0296	cbcX	choline	672.284	-1.18126	1.18126	1.03886e-06	2.43438e-05	E
PP_1146		conserved exported protein of unknown function	502.981	1.18107	1.18107	6.53076e-07	1.62789e-05
PP_4214	pvdN	pyoverdine biosynthesis related protein	240.813	1.17997	1.17997	0.00231562	0.0140363	E
PP_0910		conserved exported protein of unknown function	173.803	1.17858	1.17858	9.79617e-05	0.0010924	C
PP_0867		FecA-like outer membrane receptor	127.46	1.17324	1.17324	2.6802e-07	7.57155e-06	P
PP_3688		conserved protein of unknown function	140.537	-1.16864	1.16864	4.76806e-05	0.000601846
PP_4349		conserved protein of unknown function	50.9959	-1.16031	1.16031	0.000291114	0.00267205
PP_4802		putative lipoate regulatory protein	168.864	1.15929	1.15929	5.15416e-05	0.000645539	S
PP_0379	pqqB	Coenzyme PQQ synthesis protein B	328.272	1.15725	1.15725	1.18444e-05	0.000189996	R
PP_1181		DNA-binding response regulator	47.7088	-1.15712	1.15712	0.000216048	0.00212496	TK
PP_4612		putative FecR protein	51.9788	1.15647	1.15647	0.000305229	0.00276665	PT
PP_0888	regA	Photosynthetic apparatus regulatory protein	808.232	1.15577	1.15577	2.03616e-05	0.000302744	TK
PP_1139	livM	branched chain amino acid transporter - permease	567.406	-1.15009	1.15009	0.000169957	0.0017424	E
PP_4643		Xanthine	38.2183	-1.1483	1.1483	0.00601931	0.0294309	F
PP_0236	ssuE	NAD(P)H-dependent FMN reductase subunit	91.7536	1.14774	1.14774	0.00838561	0.0385388	R
PP_3230		Phosphoribosyl transferase domain protein	290.205	1.14755	1.14755	5.48764e-10	3.2829e-08	R
PP_0418	estP	Esterase EstP	457.5	-1.14392	1.14392	0.000758822	0.00579371	IR
PP_4839		putative iron-regulated membrane protein	47.5264	1.14373	1.14373	6.23034e-05	0.000750742	S
PP_5492		conserved protein of unknown function	360.567	-1.14275	1.14275	1.36963e-05	0.000216291
PP_4415		conserved protein of unknown function	874.408	-1.14128	1.14128	1.06301e-06	2.47955e-05
PP_0995		conserved membrane protein of unknown function	87.5969	1.13976	1.13976	0.000490362	0.00409557	S
PP_1484	ydcT	predicted polyamine ABC transporter, ATP-binding	131.973	-1.13813	1.13813	0.000440495	0.00374568	E
PP_3601	garD	galactarate dehydratase	53.598	-1.13796	1.13796	0.00714342	0.0340434	G
PP_5689		conserved protein of unknown function	37.2704	-1.13744	1.13744	0.00349095	0.0193396
PP_1162	gstA	Protein GstA	25.5654	-1.13685	1.13685	0.0101892	0.0445763	O
PP_4346	ddlA	D-alanine--D-alanine ligase A	244.879	-1.13578	1.13578	9.19355e-05	0.00102972	M
PP_3782		conserved protein of unknown function	228.357	-1.1343	1.1343	0.000753161	0.00576781
PP_1132	nhaA-I	Na(+)	51.007	-1.1338	1.1338	0.000654997	0.00519209	P
PP_4210	pvdT	pyoverdine efflux carrier and ATP binding	188.562	1.13245	1.13245	0.00314605	0.0178346	V
PP_4856		Ferritin, Dps family protein	79.6213	1.13177	1.13177	0.000976943	0.00704184	P
PP_0413		Polyamine ABC transporter, permease protein	226.593	-1.13165	1.13165	0.00542715	0.0270825	E
PP_2500		conserved protein of unknown function	44.2285	1.12905	1.12905	0.00727047	0.0345194	R
PP_4905	motA	Flagellar motor rotation protein	572.383	-1.12559	1.12559	2.72882e-11	2.16814e-09	N
PP_0620		GntR family transcriptional regulator	135.544	1.12486	1.12486	0.000125151	0.0013426	K
PP_0903		conserved protein of unknown function	172.302	-1.12461	1.12461	0.00034877	0.0030951	H
PP_4064	ivd	isovaleryl-CoA dehydrogenase	215.837	-1.12288	1.12288	0.00241615	0.0145743	I
PP_3579		conserved membrane protein of unknown function	41.6232	-1.12241	1.12241	0.00157162	0.0103118	S
PP_0879	dppD	dipeptide ABC transporter - putative ATP binding	328.632	-1.12	1.12	3.37951e-05	0.000461958	EP
PP_1724		putative ABC-type 2-aminoethylphosphonate	87.2495	-1.11998	1.11998	8.91008e-05	0.001006	R
PP_4624		putative hydrolase, alpha	69.0767	1.11906	1.11906	8.92247e-05	0.001006	R
PP_3259		Acyl-CoA dehydrogenase-related protein	35.378	1.1179	1.1179	0.00896827	0.0403544	I
PP_4768		Exonuclease	58.957	1.11746	1.11746	3.26018e-05	0.000448055	L
PP_5667		putative microcin B17-like-processing protein,	40.3519	-1.11694	1.11694	0.00160842	0.0105126
PP_4994		conserved protein of unknown function	174.026	1.11428	1.11428	3.33609e-08	1.22928e-06	M
PP_4614		conserved protein of unknown function	61.3366	1.11311	1.11311	0.00945838	0.0418954
PP_3961		putative Transporter	43.8909	-1.11273	1.11273	0.00631971	0.0305473
PP_3209		Isoxanthopterin deaminase	30.075	1.11139	1.11139	0.000536991	0.00441844	FR
PP_4755		Outer membrane ferrichrome-iron receptor	24.4639	1.11108	1.11108	0.00987164	0.0433483	P
PP_2590		Outer membrane ferric siderophore receptor	26.8279	1.11035	1.11035	0.00603355	0.0294439	P
PP_2458	rbsK	ribokinase	153.048	-1.10979	1.10979	0.00417989	0.0222098	G
PP_0308		putative dipeptidase	27.0135	-1.10878	1.10878	0.00884163	0.0399997	E
PP_2553		Major facilitator family transporter	88.1977	-1.1086	1.1086	0.000817154	0.00612866	GEPR
PP_3631	htrG	putative signal transduction protein	90.245	1.10782	1.10782	0.00219185	0.0134771	T
PP_1015	gtsA	mannose	16358.9	-1.10574	1.10574	0.00041247	0.00353695	G
PP_1957		Oxidoreductase, Pdr	38.4472	-1.10555	1.10555	0.0104138	0.0453762	C
PP_5550		conserved protein of unknown function	900.338	1.10506	1.10506	5.92103e-05	0.000722024
PP_2023		Glutathione S-transferase family protein	58.6973	1.10359	1.10359	0.00039523	0.00341137	O
PP_3416	gnuK	D-gluconate kinase	1013.97	-1.10296	1.10296	4.15243e-05	0.000541412	G
PP_5360		conserved protein of unknown function	53.1437	1.10287	1.10287	0.000804922	0.00605478
PP_5193	gcvH-II	glycine cleavage system H protein 2	378.765	-1.10201	1.10201	8.95158e-16	1.68588e-13	E
PP_1840		conserved protein of unknown function	208.282	1.10121	1.10121	0.00133889	0.00905101
PP_4586		conserved exported protein of unknown function	254.21	1.09998	1.09998	6.53206e-06	0.000112978	R
PP_0866		putative Transmembrane sensor	107.691	1.09946	1.09946	6.22466e-07	1.56695e-05	PT
PP_3609		conserved membrane protein of unknown function	42.0482	1.0983	1.0983	0.000332855	0.00296942	S
PP_3564		Transcriptional regulator, AraC family	153.877	1.09723	1.09723	0.000922313	0.00673845	K
PP_2671		Sensor histidine kinase	39.4674	1.09723	1.09723	0.000797464	0.00600756	T
PP_3228		putative Periplasmic aliphatic sulfonate-binding	23.2468	1.0966	1.0966	0.00531166	0.026705	P
PP_0371		Transcriptional regulator, LysR family	87.5606	1.09266	1.09266	3.02148e-06	6.02519e-05	K
PP_0791	yjjV	putative hydrolase	147.991	1.0908	1.0908	4.60728e-06	8.33737e-05	L
PP_2182		conserved protein of unknown function	421.955	1.08871	1.08871	0.000371682	0.00325302	T
PP_3654		leucine-responsive regulatory protein	23.1948	-1.08718	1.08718	0.011405	0.0487756	K
PP_3640		Transcriptional regulator, AraC family	334.132	-1.0849	1.0849	7.21609e-10	4.16975e-08	K
PP_2551		Transcriptional regulator, LysR family	70.825	1.08447	1.08447	0.00085986	0.00639238	K
PP_0626	ndh	NADH dehydrogenase	641.986	1.08317	1.08317	5.24827e-06	9.36402e-05	C
PP_2647		Major facilitator family transporter	95.3119	-1.08266	1.08266	2.82394e-06	5.69832e-05	G
PP_3086		putative RNA polymerase sigma-70 factor	69.5428	1.08095	1.08095	0.000330863	0.00295688	K
PP_1995	trpF	N-(5'-phosphoribosyl)anthranilate isomerase	608.586	1.08003	1.08003	1.90699e-05	0.000288603	E
PP_3498		transposase	360.412	1.07928	1.07928	1.10327e-11	1.0018e-09	L
PP_0821		conserved exported protein of unknown function	65.1439	1.07861	1.07861	0.000698463	0.00543071	S
PP_0863		conserved protein of unknown function	85.8818	1.07744	1.07744	0.000954984	0.00690767	R
PP_4250	ccoN-I	cytochrome c oxidase subunit I, cbb3-type	23523.6	-1.07638	1.07638	3.69527e-06	7.01137e-05	O
PP_2990		Transcriptional regulator, MerR family	195.02	1.07606	1.07606	4.34723e-07	1.14537e-05	K
PP_2609		Transcriptional regulator, IclR family	61.6386	1.07489	1.07489	9.71928e-05	0.00108621	K
PP_0788		conserved protein of unknown function	189.75	1.07134	1.07134	3.73986e-07	1.0062e-05
PP_1012	gltR-II	DNA-binding response regulator	465.258	-1.07027	1.07027	5.34075e-05	0.00066563	TK
PP_3693		putative Transcriptional regulator MvaT, P16	1499.84	-1.06859	1.06859	1.35379e-06	3.07323e-05
PP_3246	crtZ	Beta-carotene hydroxylase	32.691	1.06777	1.06777	0.00414359	0.022113
PP_1010	edd	phosphogluconate dehydratase	3299.84	-1.06515	1.06515	2.07831e-07	6.10878e-06	EG
PP_5313	hupA	DNA-binding protein HU-alpha	228.549	-1.05837	1.05837	0.00373544	0.0203587	L
PP_4493	ydiJ	putative oxidoreductase	786.357	1.05698	1.05698	7.77302e-07	1.89119e-05	C
PP_4688		Heme	76.9987	1.05432	1.05432	0.000623719	0.00498681	P
PP_4065	mccB	methylcrotonyl-CoA carboxylase biotin-containing	215.931	-1.05097	1.05097	0.00350713	0.0193845	I
PP_5673		putative D-alanine--D-alanine ligase	90.5245	-1.05077	1.05077	0.000491508	0.00409724	M
PP_2819	oprJ	Outer membrane protein OprJ	66.1036	1.04953	1.04953	0.00485234	0.0248731	MU
PP_5589		protein of unknown function containing Rhs	217.284	-1.04769	1.04769	9.80618e-08	3.13613e-06
PP_2326		Universal stress protein	228.704	1.04652	1.04652	0.000350263	0.00310294	T
PP_1318	petB	Cytochrome b	12250.1	-1.04596	1.04596	3.93692e-16	7.69971e-14	C
PP_0550		conserved protein of unknown function	589.274	1.04463	1.04463	0.000677818	0.00531899	MG
PP_4817		MaoC domain protein	293.716	-1.04457	1.04457	3.69462e-05	0.000500991	I
PP_5419	atpB	ATP synthase subunit a	3700.15	-1.04322	1.04322	1.49574e-08	6.23428e-07	C
PP_4687	hmuV	Hemin import ATP-binding protein HmuV	67.908	1.04196	1.04196	0.000384206	0.00332826	P
PP_0425	yhfA	conserved protein of unknown function	143.967	-1.0414	1.0414	7.16057e-05	0.000842859	O
PP_5304		putative Lipoprotein	880.862	1.03922	1.03922	1.17786e-06	2.69795e-05
PP_3787		conserved protein of unknown function	1722.06	-1.03832	1.03832	2.95056e-05	0.000411312	I
PP_5732		putative metal-binding protein	258.347	-1.03772	1.03772	1.97957e-05	0.000296935	P
PP_1822		conserved protein of unknown function	77.7088	1.03436	1.03436	0.000850565	0.00635114	O
PP_3117		putative protein involved in error-prone	47.3011	1.03411	1.03411	0.0012311	0.00850564	S
PP_0909		conserved exported protein of unknown function	524.381	1.03326	1.03326	1.07425e-05	0.000175082	R
PP_0817	alaC	aminotransferase	1564.21	-1.03077	1.03077	8.78155e-08	2.88092e-06	E
PP_1720		Alcohol dehydrogenase, zinc-containing	1192.27	1.02952	1.02952	3.09095e-06	6.13963e-05	CR
PP_4212	pvdP	pyoverdine biosynthesis related protein	354.917	1.02821	1.02821	0.000882255	0.00650712
PP_3592		Transcriptional regulator, RpiR family	66.8799	-1.02685	1.02685	0.00227232	0.0138712	K
PP_2001	metZ	O-succinylhomoserine sulfhydrylase	1993.64	1.02642	1.02642	1.40145e-15	2.3155e-13	E
PP_0766		conserved exported protein of unknown function	6700.02	-1.02615	1.02615	0.000361041	0.00318179
PP_0365	bioC	Malonyl-[acyl-carrier protein]	340.816	1.02575	1.02575	0.000155984	0.00162204	H
PP_3690		conserved protein of unknown function	619.773	1.02455	1.02455	1.22623e-10	8.42617e-09
PP_1364		conserved exported protein of unknown function	923.868	1.02416	1.02416	4.20145e-05	0.00054526
PP_4835		conserved exported protein of unknown function	249.608	-1.02337	1.02337	7.94209e-05	0.000917779
PP_5717		conserved protein of unknown function	96.0135	-1.0219	1.0219	0.00392833	0.021183
PP_4323	ccmE	Cytochrome c-type biogenesis protein CcmE	219.746	-1.02154	1.02154	2.09343e-06	4.43545e-05	O
PP_5221		conserved protein of unknown function, UPF0178	158.149	1.02101	1.02101	0.000761464	0.00579767	S
PP_2901	pvdQ	Acyl-homoserine lactone acylase	306.612	1.02034	1.02034	0.00184629	0.0116771	R
PP_0389	rpsU	30S ribosomal protein S21	325.654	1.02022	1.02022	0.00293632	0.0169673	J
PP_3610		conserved protein of unknown function	357.317	-1.01912	1.01912	4.15029e-06	7.70227e-05	L
PP_1732	minE	Cell division topological specificity factor	215.527	1.01855	1.01855	9.56266e-08	3.09721e-06	D
PP_1958		conserved protein of unknown function	857.027	-1.01741	1.01741	1.13592e-15	1.99177e-13
PP_4108		putative 4-aminobutyrate aminotransferase	254.103	1.01536	1.01536	5.24196e-05	0.000654923	E
PP_3079	ppiC-II	peptidyl-prolyl cis-trans isomerase C (rotamase	404.885	-1.0133	1.0133	4.13633e-06	7.70227e-05	O
PP_2740		Transcriptional regulator, MerR family	234.259	1.01207	1.01207	6.42179e-06	0.00011145	K
PP_0843	iscU	scaffold protein involved in iron-sulfur cluster	352.606	1.01178	1.01178	4.97203e-08	1.76803e-06	C
PP_4506		Nitroreductase family protein	519.625	1.01154	1.01154	0.00322711	0.018138	C
PP_3252		Modification methylase, HemK family	31.0819	1.01108	1.01108	0.0065714	0.0315539	J
PP_5312		conserved exported protein of unknown function	58.0611	-1.01069	1.01069	0.00580753	0.0286711
PP_1460		putative Membrane protein	276.037	-1.00846	1.00846	0.000302053	0.00274275	R
PP_2722		conserved protein of unknown function	46.4238	1.00793	1.00793	0.000873507	0.0064749
PP_5579		conserved protein of unknown function	514.803	-1.00696	1.00696	0.00212123	0.0131063
PP_3004		conserved protein of unknown function	56.2822	1.0054	1.0054	0.00340855	0.0189633
PP_1832		putative Oxidase	123.892	1.00454	1.00454	1.64777e-05	0.000257022	S
PP_4216	pvdE	pyoverdine ABC export system, fused ATPase and	360.825	1.00441	1.00441	0.0091865	0.0410812	QP
PP_4038	pydA	NADP-dependent dihydropyrimidine dehydrogenase	7515.53	-1.00333	1.00333	0.00266382	0.0157873	F
PP_1144		conserved membrane protein of unknown function	934.984	1.00302	1.00302	0.000507111	0.00421184	T
PP_5181	spuD	spermidine	9112.61	-1.00155	1.00155	6.52536e-10	3.85831e-08	E
PP_0837	ycfJ	putative regulator of flagellation	771.297	1.00123	1.00123	1.80291e-08	7.45351e-07	S
PP_4879	rlmB	23S rRNA (guanosine-2'-O-)-methyltransferase	834.714	1.00059	1.00059	6.51351e-05	0.000779322	J
PP_0878	dppF	dipeptide ABC transporter, binding subunit	281.867	-1.00044	1.00044	0.000317371	0.00285634	E
PP_1582		conserved protein of unknown function	278.96	1.00008	1.00008	2.19722e-06	4.61688e-05

## Sheet: Triethylamine hydrogen sulfate
Locus_tag	Gene name	Description	baseMean	log2FC	ABS(log2FC)	pvalue	padj	COG
PP_3726		Enoyl-CoA hydratase	40.2947	6.75924	6.75924	5.00294e-30	1.52308e-27	I
PP_3725		putative Acyl-CoA dehydrogenase	98.6274	6.32717	6.32717	2.10627e-22	4.10385e-20	I
PP_2817	mexC	Multidrug efflux RND membrane fusion protein	22.836	5.92082	5.92082	6.95918e-29	1.88323e-26	M
PP_3724		putative Acyl-CoA synthetase	136.742	5.25017	5.25017	1.13529e-49	1.84333e-46	C
PP_4930	emrE	putative small multidrug resistance protein	54.4461	5.13488	5.13488	6.86823e-35	2.78793e-32	P
PP_3723	aruI	putative 2-ketoarginine decarboxylase AruI	109.242	4.55128	4.55128	1.63861e-48	1.99541e-45	EH
PP_5073		conserved exported protein of unknown function	340.116	4.31596	4.31596	2.60307e-66	6.33978e-63	S
PP_5340	aphA	Acetylpolyamine aminohydrolase	74.9017	3.8673	3.8673	3.00979e-39	1.33279e-36	BQ
PP_4738		conserved exported protein of unknown function	11.869	3.78133	3.78133	2.56837e-07	1.47183e-05
PP_2818	mexD	Multidrug efflux RND transporter MexD	65.6371	3.74018	3.74018	7.56234e-48	7.36723e-45	V
PP_4561	csbD	stress response protein	14.1122	3.68789	3.68789	9.56043e-09	6.74911e-07	S
PP_1750	asnB	asparagine synthetase	212.169	3.66402	3.66402	1.56753e-28	4.01865e-26	E
PP_3732		Enoyl-CoA hydratase	63.9402	3.45214	3.45214	2.90999e-26	7.08728e-24	I
PP_1185	oprH	Outer membrane protein H1	6411.82	3.36355	3.36355	4.57216e-31	1.48473e-28	M
PP_3241		conserved exported protein of unknown function	16.4914	3.26892	3.26892	6.70154e-11	6.52864e-09	S
PP_0869	yehW	osmoprotectant ABC transporter permease subunit	26.2066	3.2244	3.2244	6.42651e-12	7.2799e-10	E
PP_4735	lldP	L-lactate permease	1233.6	-2.98909	2.98909	0.00229113	0.0246905	C
PP_3730	aruR	Transcriptional regulatory protein AruR	83.2497	2.90701	2.90701	3.11034e-23	6.58715e-21	TK
PP_3731		Transcriptional regulator, TetR family	148.088	2.77697	2.77697	5.00032e-41	2.43566e-38	K
PP_3455		Multidrug efflux RND membrane fusion protein	234.453	2.75608	2.75608	1.67213e-41	9.04994e-39	M
PP_3456	mexB	Multidrug resistance protein MexB	413.159	2.73226	2.73226	4.26365e-46	2.59603e-43	V
PP_0870		putative Glycine betaine	86.0957	2.67479	2.67479	1.76449e-24	3.90673e-22	M
PP_4737	dld2	D-lactate dehydrogenase	482.459	-2.65664	2.65664	0.00280786	0.0284599	C
PP_1502		OmpA family protein	311.753	2.64079	2.64079	9.99586e-34	3.74537e-31	M
PP_2052		putative bifunctional enzyme:	716.142	2.63206	2.63206	2.30279e-47	1.86948e-44	R
PP_4856		Ferritin, Dps family protein	79.6213	2.56655	2.56655	1.65205e-16	2.43853e-14	P
PP_1749		GNAT family acetyltransferase	191.163	2.52368	2.52368	2.81472e-33	9.7932e-31	M
PP_4855		Osmotically-inducible lipoprotein OsmE	14.7173	2.46238	2.46238	1.35926e-06	6.3663e-05
PP_2034		conserved membrane protein of unknown function	79.4921	-2.45493	2.45493	1.96006e-07	1.1503e-05	G
PP_2035	benE-I	benzoate transport protein	103.293	-2.44938	2.44938	8.23204e-08	5.07573e-06	Q
PP_1186	phoP	two component system DNA-binding transcriptional	1107.55	2.44331	2.44331	2.72046e-68	1.32513e-64	TK
PP_3266		conserved protein of unknown function	18.3195	2.42648	2.42648	4.84853e-06	0.000190461	S
PP_3745	glcD	glycolate oxidase, putative FAD-linked subunit	87.8659	2.38986	2.38986	0.000436663	0.00662612	C
PP_0868	yehX	ABC transporter ATP-binding subunit	223.302	2.38846	2.38846	3.24227e-46	2.25616e-43	E
PP_1503		conserved protein of unknown function	99.9399	2.37091	2.37091	4.37739e-19	7.35251e-17
PP_4422	gabD-II	succinate-semialdehyde dehydrogenase (NADP+)	982.538	-2.30665	2.30665	3.33751e-05	0.000916491	C
PP_3746	glcE	glycolate oxidase, putative FAD-binding subunit	26.957	2.30637	2.30637	0.000132887	0.00275444	C
PP_1748		conserved protein of unknown function	64.9406	2.29749	2.29749	7.37425e-13	9.21025e-11	G
PP_3929		conserved protein of unknown function	27.9755	2.26077	2.26077	0.000191231	0.00362446
PP_3661		conserved membrane protein of unknown function,	62.4197	2.23412	2.23412	4.20717e-17	6.83105e-15	S
PP_2819	oprJ	Outer membrane protein OprJ	66.1036	2.21788	2.21788	1.0115e-09	8.95821e-08	MU
PP_5717		conserved protein of unknown function	96.0135	-2.19926	2.19926	5.20326e-09	4.02303e-07
PP_5461		protein of unknown function	53.9195	-2.1989	2.1989	1.52926e-05	0.000480583
PP_4707		OsmY-related protein	71.44	2.19853	2.19853	5.44329e-17	8.55298e-15	R
PP_0085		conserved protein of unknown function	93.1442	2.18135	2.18135	3.52688e-13	4.64309e-11	S
PP_3729		Periplasmic amino acid-binding protein-related	22.2421	2.17472	2.17472	4.5751e-06	0.000182234	ET
PP_2345		conserved exported protein of unknown function	52.5803	2.15361	2.15361	5.52072e-08	3.49239e-06	S
PP_0216		putative sensory box	143.185	2.15178	2.15178	9.49716e-17	1.44565e-14	T
PP_3747	glcF	glycolate oxidase, iron-sulfur subunit	21.4667	2.09392	2.09392	0.00030082	0.00512341	C
PP_1833		conserved protein of unknown function	60.4525	2.09045	2.09045	2.79263e-06	0.00012038
PP_0905		conserved exported protein of unknown function	426.931	-2.05533	2.05533	6.44045e-13	8.25564e-11
PP_5523		conserved protein of unknown function	22.3919	-2.04316	2.04316	7.46766e-05	0.0017488
PP_1187	phoQ	sensor protein	349.793	2.03657	2.03657	3.57154e-23	7.24875e-21	T
PP_3100		conserved protein of unknown function	253.83	1.96847	1.96847	2.26095e-25	5.24432e-23	S
PP_2037		putative Aldolase	292.332	-1.94972	1.94972	0.000110218	0.00236551	G
PP_3631	htrG	putative signal transduction protein	90.245	1.94586	1.94586	1.99653e-09	1.70616e-07	T
PP_2172		conserved exported protein of unknown function	23.899	1.88196	1.88196	0.00160756	0.0190986
PP_5423		conserved membrane protein of unknown function	74.6716	-1.87438	1.87438	2.10264e-08	1.42249e-06
PP_1306		Pyocin S-type Killer domain protein	65.3646	-1.87194	1.87194	8.15904e-06	0.000293079
PP_2820	nfxB	HTH-type transcriptional regulator nfxB	74.4517	1.84495	1.84495	2.66825e-11	2.76533e-09	K
PP_3098		conserved protein of unknown function	24.1867	1.84436	1.84436	7.39362e-05	0.0017479	S
PP_5502	rmf	ribosome modulation factor	1413.79	1.83618	1.83618	0.000131464	0.0027366	J
PP_2506		conserved membrane protein of unknown function	18.9179	-1.81554	1.81554	0.000480565	0.00708866
PP_4461		Major facilitator family transporter	25.3377	-1.80419	1.80419	0.0043874	0.0392129	GEPR
PP_0150		conserved exported protein of unknown function	24.4505	1.76648	1.76648	0.000956223	0.0125886
PP_4614		conserved protein of unknown function	61.3366	1.76574	1.76574	7.54585e-06	0.000280579
PP_5549		conserved protein of unknown function	9.56231	1.76447	1.76447	0.00462365	0.0406531
PP_2628		Uncharacterized ABC transporter ATP-binding	940.865	1.75466	1.75466	2.71771e-29	7.78705e-27	V
PP_4348		putative Cystathionine beta-lyase	17.378	-1.74897	1.74897	0.00213945	0.0234186	E
PP_1101		conserved protein of unknown function	15.2659	1.73863	1.73863	0.00228378	0.0246658
PP_0221		methionine ABC transporter periplasmic-binding	10.9304	1.73287	1.73287	0.00388976	0.0359526	P
PP_2059		UPF0337 protein PP_2059	13.167	1.73228	1.73228	0.000799609	0.0109715	S
PP_5520		conserved protein of unknown function	18.7132	1.72526	1.72526	0.000837647	0.0114291
PP_2840		putative Membrane protein	23.8846	1.72505	1.72505	0.000425979	0.00652499	P
PP_0831		hypothetical protein	68.3996	-1.71663	1.71663	1.57291e-05	0.000488003	O
PP_0871		putative Glycine betaine	118.529	1.70235	1.70235	1.76342e-14	2.45417e-12	E
PP_2125	yegS	lipid kinase	45.1228	1.68013	1.68013	9.67711e-07	4.68148e-05	IR
PP_5686		protein of unknown function	102.652	-1.6767	1.6767	3.3228e-05	0.000916491
PP_3454		putative transcriptional regulatory protein	129.47	1.67172	1.67172	1.61929e-13	2.19099e-11	TK
PP_3337		conserved membrane protein of unknown function	94.3851	-1.66907	1.66907	3.18221e-05	0.000901195
PP_0241		Transporter	20.9506	1.65889	1.65889	0.00416374	0.0379095	H
PP_2144		Transcriptional regulator, TetR family	423.542	1.6537	1.6537	3.04755e-20	5.70947e-18	K
PP_0101		putative sulfate transporter	63.4638	1.6504	1.6504	4.60167e-06	0.000182234	P
PP_2581		conserved protein of unknown function	20.8767	1.64247	1.64247	0.00311521	0.0306652
PP_5580		protein of unknown function	39.6445	-1.62745	1.62745	9.25761e-05	0.00202214
PP_2036		putative 4-hydroxy-tetrahydrodipicolinate synthase	688.595	-1.58458	1.58458	0.00125219	0.0156797	EM
PP_1091		conserved protein of unknown function	19.9346	-1.58155	1.58155	0.00159591	0.0190065
PP_4421		putative aminotransferase	2174.95	-1.56958	1.56958	1.02916e-05	0.000353032	H
PP_0297	tdcG-I	L-serine dehydratase	17.1869	-1.55362	1.55362	0.00305665	0.0303237	E
PP_2887		Catalase-related peroxidase	20.0808	1.54411	1.54411	0.000314765	0.00528059	P
PP_1508		conserved protein of unknown function	75.2598	-1.5269	1.5269	1.37405e-07	8.36625e-06
PP_3453		putative Sensor protein RstB	174.122	1.52534	1.52534	1.3475e-12	1.64091e-10	T
PP_3103		conserved protein of unknown function	51.78	-1.51067	1.51067	1.33704e-05	0.000434182
PP_3877		conserved protein of unknown function	24.0612	1.50237	1.50237	0.00235735	0.0251812	R
PP_0115	katE	hydroperoxidase - self catalytic heme d	161.009	1.45928	1.45928	1.41592e-11	1.49934e-09	P
PP_1569		conserved protein of unknown function	40.8879	1.45891	1.45891	0.00477334	0.0414455
PP_5444		protein of unknown function	84.2766	-1.44794	1.44794	6.95892e-05	0.00166161
PP_5702		conserved protein of unknown function	167.59	1.44673	1.44673	5.03588e-08	3.2276e-06
PP_3710		conserved protein of unknown function	22.0971	-1.43956	1.43956	0.0029184	0.0291804
PP_5579		conserved protein of unknown function	514.803	-1.43818	1.43818	1.2288e-05	0.000407176
PP_5408		conserved protein of unknown function	124.952	-1.42726	1.42726	9.72331e-06	0.000335902
PP_0482	bfr-I	bacterioferritin	2457.1	-1.40308	1.40308	3.6276e-08	2.38784e-06	P
PP_1033		Sulfatase domain protein	873.999	-1.40089	1.40089	4.32162e-09	3.45092e-07	P
PP_3728		Sensor histidine kinase	78.9173	1.39882	1.39882	1.09525e-06	5.23038e-05	T
PP_3420		Sensor histidine kinase	126.986	-1.39041	1.39041	3.30096e-05	0.000916491	T
PP_3743		conserved exported protein of unknown function	42.131	1.38859	1.38859	0.000294531	0.00503389
PP_5562		conserved protein of unknown function	174.382	1.37691	1.37691	3.55593e-10	3.33095e-08
PP_3099	puuD	uricase	578.696	1.36048	1.36048	6.90193e-09	5.25301e-07	S
PP_4547		putative Glutamine synthetase	54.8307	1.35684	1.35684	1.60751e-05	0.000492464	E
PP_0368		putative Acyl-CoA dehydrogenase	3226.96	1.33886	1.33886	8.91619e-20	1.5511e-17	I
PP_3654		leucine-responsive regulatory protein	23.1948	-1.33654	1.33654	0.00201983	0.0226696	K
PP_1142		conserved protein of unknown function	81.4826	-1.32914	1.32914	3.45584e-05	0.000931363	S
PP_3894		putative Phage replication protein O	51.5437	-1.32612	1.32612	6.94378e-05	0.00166161
PP_3658		putative Aromatic compound MFS transporter	46.1138	-1.32576	1.32576	0.000199603	0.00373948	G
PP_1073	glpD	glycerol-3-phosphate dehydrogenase (aerobic)	332.015	1.31783	1.31783	3.43579e-11	3.48661e-09	C
PP_5728		conserved protein of unknown function containing	45.446	-1.3113	1.3113	0.00086184	0.0116083
PP_5726		conserved protein of unknown function	94.3063	-1.31069	1.31069	6.57288e-05	0.00158617
PP_4528		conserved protein of unknown function	38.5072	1.30414	1.30414	8.90014e-05	0.00196165
PP_3504		conserved protein of unknown function	180.604	-1.30299	1.30299	0.00155664	0.01863
PP_3095	clpV	Protein ClpV1	414.465	1.30037	1.30037	1.07249e-11	1.1873e-09	O
PP_3094		conserved exported protein of unknown function	55.1071	1.29848	1.29848	0.000283748	0.0049362	S
PP_1578		conserved protein of unknown function	56.5674	1.2953	1.2953	0.000708605	0.00986176
PP_1571		conserved protein of unknown function	46.3104	1.28494	1.28494	0.0012121	0.0152957
PP_0089	osmC	stress-induced peroxiredoxin, lipoyl-dependent	30.6193	1.28403	1.28403	0.00195479	0.0220923	O
PP_0092		putative lipoprotein	41.0936	1.28115	1.28115	0.00111765	0.0144404
PP_2462		conserved protein of unknown function	146.623	1.2726	1.2726	7.46975e-07	3.71277e-05
PP_2346		conserved exported protein of unknown function	46.2584	1.26891	1.26891	1.12478e-05	0.000380473	S
PP_1130		conserved protein of unknown function	415.722	-1.26051	1.26051	1.88131e-09	1.6364e-07
PP_5363		conserved exported protein of unknown function	61.671	1.25833	1.25833	3.15597e-05	0.000898989
PP_3959		Voltage-gated chloride channel family protein	120.554	-1.24947	1.24947	3.2086e-07	1.77603e-05	P
PP_5615		conserved protein of unknown function	24.4215	-1.2476	1.2476	0.0046816	0.0410145
PP_5193	gcvH-II	glycine cleavage system H protein 2	378.765	-1.24722	1.24722	5.58451e-20	1.00749e-17	E
PP_3555		putative Transmembrane sensor	1009.14	-1.24618	1.24618	8.01983e-07	3.94592e-05	PT
PP_1576		putative Immunity protein	239.966	-1.24031	1.24031	6.96025e-06	0.000260795
PP_3093		conserved protein of unknown function	198.401	1.23835	1.23835	8.57556e-09	6.42639e-07	S
PP_3089		conserved protein of unknown function	3659.57	1.2359	1.2359	8.52405e-16	1.2212e-13	S
PP_1999	cvpA	membrane protein required for colicin V	189.683	-1.23501	1.23501	0.000142678	0.00289576	R
PP_5718		conserved membrane protein of unknown function	66.8662	-1.23206	1.23206	0.000229843	0.00420889
PP_1212		conserved protein of unknown function	29.6944	-1.22583	1.22583	0.00608541	0.0495686	S
PP_1956		conserved exported protein of unknown function	59.981	-1.21339	1.21339	0.000287649	0.00496858	C
PP_5561		conserved protein of unknown function	38.3299	1.21224	1.21224	0.0048833	0.0420397	S
PP_0249		conserved protein of unknown function	182.365	-1.20911	1.20911	2.34699e-09	1.95684e-07	O
PP_3849		putative calcium-binding protein,	91.9442	-1.20351	1.20351	1.21031e-05	0.0004061	Q
PP_5377		conserved hypothetical protein	211.208	-1.19859	1.19859	9.70702e-07	4.68148e-05	R
PP_5232		conserved protein of unknown function	4345.97	-1.19856	1.19856	1.59331e-05	0.000491203
PP_5734		conserved hypothetical protein	466.602	-1.1969	1.1969	1.10393e-08	7.5736e-07
PP_3092		conserved protein of unknown function	63.9361	1.19295	1.19295	7.75777e-06	0.000286274	S
PP_3592		Transcriptional regulator, RpiR family	66.8799	-1.19255	1.19255	0.000374646	0.005925	K
PP_4921		Transporter, NCS1 nucleoside transporter family	355.768	1.19249	1.19249	2.37022e-09	1.95684e-07	F
PP_4412		conserved protein of unknown function	86.8146	-1.19175	1.19175	3.939e-06	0.000162601
PP_4851		Phosphate starvation-inducible protein, PSIF	538.366	-1.19145	1.19145	2.27832e-07	1.32116e-05
PP_3613		L-sorbosone dehydrogenase	129.2	1.19048	1.19048	2.23834e-12	2.65926e-10	G
PP_5748	ccmH	cytochrome c heme lyase subunit	180.1	-1.18922	1.18922	1.26067e-06	5.96185e-05	O
PP_3421		Sensor histidine kinase	323.922	-1.17817	1.17817	1.06172e-08	7.38807e-07	T
PP_4254		conserved protein of unknown function	79.5526	-1.17281	1.17281	0.000681643	0.00956853
PP_3405		conserved membrane protein of unknown function	148.311	-1.16493	1.16493	1.08634e-05	0.000370039	E
PP_0056	betA-I	choline dehydrogenase	120.249	1.15908	1.15908	0.00418558	0.0380372	E
PP_1579		conserved protein of unknown function	533.417	1.15787	1.15787	7.70496e-05	0.00178718
PP_5610		protein of unknown function	92.5777	-1.1565	1.1565	1.41313e-06	6.49373e-05
PP_5384	copS	copper sensor protein	201.858	-1.1548	1.1548	2.4468e-05	0.000735701	T
PP_5334		conserved membrane protein of unknown function	76.4482	-1.15098	1.15098	0.00176777	0.0206788	S
PP_0308		putative dipeptidase	27.0135	-1.1448	1.1448	0.00543417	0.0456377	E
PP_5589		protein of unknown function containing Rhs	217.284	-1.14252	1.14252	4.73275e-09	3.71826e-07
PP_2900		conserved protein of unknown function	170.204	-1.14239	1.14239	0.00383753	0.0357453	P
PP_4176		putative 5-oxo-L-prolinase	38.3809	1.13573	1.13573	0.00323215	0.0314876	R
PP_4978		conserved protein of unknown function	194.138	1.13361	1.13361	2.15359e-08	1.43701e-06
PP_3656		putative Aromatic compound-specific porin	120.904	-1.13211	1.13211	0.000382717	0.00599426
PP_5450		exported protein of unknown function	136.523	-1.13136	1.13136	2.7252e-07	1.54354e-05
PP_5435		conserved protein of unknown function	48.6669	-1.12664	1.12664	0.000463636	0.00690633	S
PP_4411		conserved protein of unknown function	77.7363	-1.12612	1.12612	4.38775e-06	0.000176634
PP_5420	atpI	ATP synthase protein I	121.708	-1.12608	1.12608	0.00277101	0.0283459
PP_4205	mqsR	mRNA interferase MqsR of the MqsA-MqsR	124.675	-1.12193	1.12193	4.91384e-05	0.00124017
PP_5202		putative cell division protein	330.956	1.12184	1.12184	0.00146309	0.0178877	S
PP_0837	ycfJ	putative regulator of flagellation	771.297	1.12171	1.12171	1.92615e-10	1.83967e-08	S
PP_0682		conserved inner membrane protein of unknown	178.544	-1.11853	1.11853	6.07799e-07	3.08395e-05	S
PP_3557		Methyl-accepting chemotaxis transducer	91.9312	-1.11757	1.11757	0.000177027	0.00346304	NT
PP_1117		conserved protein of unknown function	32.2552	-1.10229	1.10229	0.0035699	0.033765
PP_2743		Acetyltransferase, GNAT family	43.6284	-1.09958	1.09958	0.00232996	0.0249434	R
PP_1487		conserved protein of unknown function	256.635	1.09886	1.09886	4.05247e-05	0.00105559	S
PP_3160		conserved protein of unknown function	40.3404	-1.09691	1.09691	0.00278163	0.0283459
PP_1460		putative Membrane protein	276.037	-1.09104	1.09104	8.52654e-05	0.00191395	R
PP_3695		conserved protein of unknown function	74.7078	-1.08673	1.08673	2.78147e-05	0.000816178	S
PP_5341	potF-IV	putrescine-binding periplasmic protein	251.636	1.08514	1.08514	6.91857e-07	3.47426e-05	E
PP_2424		putative 2'-5' RNA ligase	136.205	1.08457	1.08457	0.00425069	0.0383428	J
PP_4756	gabP-V	gamma-aminobutyrate permease	82.0744	-1.08225	1.08225	1.50551e-05	0.000476192	E
PP_3088		conserved protein of unknown function	182.922	1.08187	1.08187	7.61525e-08	4.75563e-06	S
PP_4922	thiC	Phosphomethylpyrimidine synthase	2224.73	1.07819	1.07819	1.49997e-05	0.000476192	H
PP_4493	ydiJ	putative oxidoreductase	786.357	1.07801	1.07801	4.44086e-07	2.37708e-05	C
PP_3132		putative Polysaccharide transporter	315.459	-1.07643	1.07643	4.82357e-10	4.35104e-08	R
PP_4020		putative Oxidoreductase	30.3529	1.07604	1.07604	0.00424925	0.0383428	E
PP_5689		conserved protein of unknown function	37.2704	-1.07558	1.07558	0.00404673	0.0371217
PP_3091		conserved membrane protein of unknown function	434.816	1.07258	1.07258	6.25729e-11	6.22026e-09	S
PP_3267		putative Clp protease	30.2778	1.07188	1.07188	0.00149375	0.0181902	OU
PP_5582		conserved protein of unknown function	709.2	-1.07179	1.07179	0.000363871	0.0057922
PP_3109		conserved protein of unknown function	73.5183	-1.06609	1.06609	0.00013111	0.0027366
PP_0441	secE	Sec translocation complex - SecE subunit	1278.7	-1.06104	1.06104	5.55217e-06	0.00021295	U
PP_5387	cusA	probable copper efflux transporter, CzcA family	61.0061	-1.04821	1.04821	0.000454303	0.00681591	P
PP_4326	ccmB	protoheme IX ABC transporter - permease subunit	41.6806	-1.0475	1.0475	0.00311625	0.0306652	O
PP_3004		conserved protein of unknown function	56.2822	1.04712	1.04712	0.00210356	0.023182
PP_0714		Transporter, PerM family	170.019	-1.04402	1.04402	0.000360974	0.00578389	R
PP_0648		conserved protein of unknown function	136.374	-1.03442	1.03442	2.8355e-05	0.000822125	S
PP_0299		conserved protein of unknown function	85.6588	-1.02966	1.02966	0.000134266	0.00277123
PP_0656		putative Amino acid ABC transporter, permease	79.4085	-1.02637	1.02637	0.00366413	0.0344555	E
PP_0713	kefB-I	Kef-type potassium	157.854	-1.02593	1.02593	1.21722e-05	0.0004061	P
PP_4346	ddlA	D-alanine--D-alanine ligase A	244.879	-1.02421	1.02421	0.000359435	0.00578389	M
PP_3588		Multidrug resistance transporter, Bcr	54.6975	-1.02089	1.02089	0.000362512	0.00578949	G
PP_5378		putative metal-binding protein	684.368	-1.01955	1.01955	5.79341e-05	0.00143978	C
PP_2105		conserved protein of unknown function	133.47	1.01856	1.01856	0.00140437	0.0173621	S
PP_2435	iscS-II	cysteine desulfurase	47.5888	1.01856	1.01856	0.00102693	0.0133747	E
PP_1167		putative TRAP dicarboxylate transporter, DctM	72.0445	-1.01489	1.01489	0.00033909	0.00563722	G
PP_2577		putative paraquat-inducible protein B (pqiB	208.331	-1.01466	1.01466	3.73399e-05	0.000988492	R
PP_0646		conserved protein of unknown function	107.314	-1.01373	1.01373	5.45049e-06	0.000210709	S
PP_2347		DNA-binding response regulator	126.744	1.0093	1.0093	2.87289e-06	0.000122753	TK
PP_3688		conserved protein of unknown function	140.537	-1.00876	1.00876	0.000346755	0.0056846
PP_5696		conserved protein of unknown function	123.536	-1.00438	1.00438	0.000103077	0.0022315
PP_1192		Acetyltransferase, GNAT family	112.933	-1.00035	1.00035	6.57782e-05	0.00158617	R
