# Supplementary material for: Generation of ionic liquid tolerant Pseudomonas putida KT2440 strains via adaptive laboratory evolution
Source: Royal Society of Chemistry journal article supplement (doi:10.1039/d0gc01663b), 2020-01-01
Supplement: d0gc01663b5.xlsx [file d0gc01663b5.xlsx]

## Sheet: TPM values used in Figure 4
					KT2440		KT2440_PP_5350'		TA8_F83_I1
	DEG (KT2440 vs KT2440_PP_5350')?	Up or down	Gene name	Product description	Replicate 1	Replicate 2	Replicate 1	Replicate 2	Replicate 1	Replicate 2
PP_1444	N		gcd	quinoprotein glucose dehydrogenase	166.681	173.203	76.1905	89.9137	146.191	178.992
PP_3382	N			gluconate 2-dehydrogenase cytochrome c subunit	139.144	151.278	71.5282	68.6283	95.4569	132.702
PP_3383	N			gluconate 2-dehydrogenase flavoprotein subunit	434.582	444.193	199.621	195.653	302.43	384.606
PP_3384	N			gluconate 2-dehydrogenase gamma subunit	198.406	160.1	100.113	95.3483	131.563	169.364
PP_1011	Y	down	glk	glucokinase	226.223	198.683	64.6534	67.0045	136.472	171.395
PP_3416	N		gnuK	D-gluconate kinase	229.518	189.639	205.057	186.494	238.224	329.264
PP_3378	N		kguK	putative 2-ketogluconokinase	104.693	93.2474	59.4999	58.3754	95.7548	139.267
PP_5351	N		zwf	glucose-6-phosphate 1-dehydrogenase	78.9862	80.3853	78.991	72.8068	102.458	93.7988
PP_1022	N		zwfA	glucose 6-phosphate-1-dehydrogenase	689.691	697.596	297.531	304.605	537.196	762.516
PP_4042	N		zwfB	glucose-6-phosphate 1-dehydrogenase	202.819	220.862	87.5301	98.7918	153.659	161.112
PP_3376	N		ptxD	putative phosphonate dehydrogenase	167.362	156.839	202.506	154.014	253.254	345.943
PP_1010	Y	down	edd	phosphogluconate dehydratase	218.546	196.73	67.4419	67.982	132.79	208.353
PP_1024	N		eda	KHG/KDPG aldolase	665.096	509.661	215.351	211.142	402.962	568.454
PP_1009	N		gapA	glyceraldehyde-3-phosphate dehydrogenase	240.557	222.88	89.1086	81.7818	167.843	229.5
PP_0665	N			putative glyceraldehyde-3-phosphate dehydrogenase	16.6698	16.7316	9.79999	10.9755	13.7739	14.4634
PP_3443	Y	down		putative glyceraldehyde-3-phosphate dehydrogenase	259.904	273.684	85.4854	90.7055	174.095	170.857
PP_5056	N		gpmI	2,3-bisphosphoglycerate-independent	603.335	601.032	545.152	610.267	578.664	592.577
PP_1612	N		eno	Enolase	1333.34	1339.77	1679.74	1720.6	1563.85	1823.66
PP_4301	N		pyk	Pyruvate kinase	6.88718	7.62135	3.45801	4.34159	5.42263	5.74021
PP_1362	N		pykA	pyruvate kinase II	525.806	584.624	321.327	280.701	253.434	239.24
PP_0338	Y	down	aceF	AceF-S-acetyldihydrolipoate	662.757	697.558	223.812	243.034	343.204	395.796
PP_0339	N		aceE	Pyruvate dehydrogenase E1 component	1348.77	1397.77	466.638	568.721	759.427	780.124
PP_5085	N		maeB	malic enzyme B	1451.2	1573.66	1049.6	978.836	1876.28	1552.8
PP_1505	N		ppc	Phosphoenolpyruvate carboxylase	131.267	124.467	49.9505	49.6094	86.1542	78.8946
PP_4194	Y	up	gltA	citrate synthase	1212.39	1115.92	4992.91	4999.46	2640.06	2829.69
PP_2112	Y	down	acnA-I	aconitate hydratase 1	311.5	342.921	55.9489	67.1349	87.7941	104.009
PP_2336	N		acnA-II	aconitate hydratase 1	63.0139	65.1303	84.3783	82.8981	78.4838	88.6404
PP_4011	N		icd	isocitrate dehydrogenase, NADP(+)-specific	2321.19	2453.83	1233.02	1325.12	1747.72	1694.83
PP_4188	Y	up	sucB	2-oxoglutarate dehydrogenase	1364.67	1361.35	4285.75	4133	2727.7	2621.27
PP_4189	Y	up	sucA	2-oxoglutarate decarboxylase, thiamine-requiring	1629.54	1610.35	4800.44	4957.46	3283.76	3131.67
PP_4187	Y	up	lpdG	dihydrolipoyl dehydrogenase	2321.16	2160.04	5256.28	5162.78	4194.96	3835.59
PP_4185	N		sucD	succinyl-CoA synthetase alpha subunit	1386.23	1362.73	1756.03	1690.54	1697.25	1648.58
PP_4186	N		sucC	succinyl-CoA synthetase, beta subunit	2103.97	2167.1	2744.67	2725.58	2659.87	2617.22
PP_4191	Y	up	sdhA	succinate dehydrogenase flavoprotein subunit	1506.28	1488.79	4087.6	4085.64	2809.19	3007.79
PP_4190	Y	up	sdhB	succinate dehydrogenase iron-sulfur subunit	1477.9	1427.49	3380.3	3198.88	2345.92	2231.06
PP_4193	Y	up	sdhC	succinate dehydrogenase membrane b-556 subunit	1274.21	1174.02	2843.51	2813.87	2082.1	2003.07
PP_4192	Y	up	sdhD	succinate dehydrogenase hydrophobic membrane	340.083	318.146	847.567	833.573	605.081	594.103
PP_0944	N		fumC-I	fumarate hydratase (class 2)	165.993	197.69	69.9695	74.3946	29.9696	41.2289
PP_1755	N		fumC-II	fumarate hydratase (class 2)	351.77	419.137	183.925	179.655	309.611	315.217
PP_0897	Y	up		Fumarate hydratase, class I	662.137	645.985	2079.78	2106.89	1401.19	1655.58
PP_0654	Y	down	mdh	putative malate dehydrogenase	91.371	121.87	26.2312	26.1275	51.7917	48.333
PP_4116	Y	up	aceA	isocitrate lyase	187.3	185.389	24814.6	26379.1	20763.2	18499.5
PP_0356	Y	up	glcB	malate synthase G	263.578	274.273	2978.04	2756.61	2687.22	2279.09
PP_4487	N		acsA-I	acetyl-CoA synthetase	477.912	387.48	1509.35	1626.33	631.752	983.491
PP_4702	N		acsA-II	acetyl-CoA synthetase	90.5213	100.297	52.4421	53.3854	94.2622	94.6361
PP_2213	N			putative acyl-CoA synthetase	21.1703	25.4783	11.0373	14.9516	18.5295	17.8396

## Sheet: KT2440_PP_5350' vs KT2440
Locus_tag	Gene name	Description	baseMean	log2FC	ABS(log2FC)	pvalue	padj
PP_4116	aceA	isocitrate lyase	32616.3	7.61272	7.61272	1.1776e-37	5.20006e-35
PP_5659		protein of unknown function	1504.49	7.3394	7.3394	6.71718e-123	3.55943e-119
PP_0754		conserved protein of unknown function	7.35686	-5.81949	5.81949	0.000350361	0.00184732
PP_2875		conserved protein of unknown function	2388.49	5.80925	5.80925	3.46884e-119	9.19069e-116
PP_5540		conserved protein of unknown function	446.015	-5.16598	5.16598	2.35007e-11	8.4142e-10
PP_0905		conserved exported protein of unknown function	426.931	-5.07421	5.07421	3.59043e-40	1.90257e-37
PP_3871		conserved protein of unknown function	2.32693	4.88502	4.88502	0.00768505	0.0251067
PP_2226	mrpF	K(+)/H(+) antiporter subunit F	4.01812	-4.81776	4.81776	0.00420479	0.0153338
PP_1572		conserved protein of unknown function	19.371	-4.81754	4.81754	0.00176563	0.00741369
PP_2446		conserved exported protein of unknown function	5.87555	-4.58239	4.58239	0.00706133	0.0233571
PP_1417		putative Tricarboxylate transport protein TctB	11.1089	4.53369	4.53369	0.000204637	0.00117356
PP_2639	dapA-II	4-hydroxy-tetrahydrodipicolinate synthase	249.21	4.52852	4.52852	7.31061e-43	5.53413e-40
PP_3850		conserved protein of unknown function	4.19905	-4.47452	4.47452	0.00737541	0.0242296
PP_3877		conserved protein of unknown function	24.0612	4.4064	4.4064	1.41315e-13	7.20027e-12
PP_2674	qedH-I	quinoprotein ethanol dehydrogenase	144.553	4.20323	4.20323	4.07685e-30	1.44022e-27
PP_2655		conserved protein of unknown function	3.89326	-4.17862	4.17862	0.0115902	0.0356245
PP_5677		conserved protein of unknown function	6.26904	-4.17565	4.17565	0.0110244	0.034081
PP_3268		MutT/nudix family protein	20.9446	-4.08843	4.08843	1.18403e-05	9.6973e-05
PP_0356	glcB	malate synthase G	8178.39	3.92665	3.92665	5.66153e-49	6.00009e-46
PP_3266		conserved protein of unknown function	18.3195	-3.73868	3.73868	0.0149309	0.043906
PP_2252		conserved exported protein of unknown function	20.3358	-3.6846	3.6846	0.000115972	0.000721285
PP_1418		putative Tricarboxylate transport protein TctC	66.2454	3.67074	3.67074	1.17222e-05	9.61547e-05
PP_3233	fnrB	transcriptional regulator with 4Fe-4S cluster,	33.9209	-3.62111	3.62111	4.02706e-08	6.47876e-07
PP_4793		conserved protein of unknown function	266.583	-3.51311	3.51311	2.4101e-13	1.19356e-11
PP_3444		Glyoxalase family protein	61.1433	-3.46885	3.46885	2.61659e-12	1.04251e-10
PP_3148		putative Glutamine synthetase	226.243	3.43977	3.43977	4.71344e-54	6.24413e-51
PP_2851		conserved protein of unknown function	56.6622	-3.43957	3.43957	5.25691e-12	1.96171e-10
PP_1742	yjcH	conserved inner membrane protein of unknown	66.0927	3.42096	3.42096	0.00514684	0.0180259
PP_2118		conserved protein of unknown function	30.6265	-3.41864	3.41864	0.000929564	0.00428327
PP_3930		conserved exported protein of unknown function	45.0586	3.39523	3.39523	7.28651e-06	6.32971e-05
PP_2159		Copper-binding protein, plastocyanin	92.0784	3.37113	3.37113	1.25895e-23	3.70621e-21
PP_5502	rmf	ribosome modulation factor	1413.79	-3.36763	3.36763	1.85362e-09	4.19759e-08
PP_3080	aroF-II	tyr-sensitive phospho-2-dehydro-3-deoxyheptonate	972.651	3.35397	3.35397	1.85893e-22	4.69069e-20
PP_4207		conserved protein of unknown function	61.6808	-3.34547	3.34547	2.36584e-09	5.26746e-08
PP_3325		putative Outer membrane ferric siderophore	176.751	3.34294	3.34294	5.50474e-13	2.53649e-11
PP_2673		Pentapeptide repeat family protein	4.83391	3.30669	3.30669	0.00054075	0.00268802
PP_4490	phhA	phenylalanine-4-hydroxylase	101.613	3.30517	3.30517	1.87929e-17	1.95262e-15
PP_0162		RNA polymerase sigma-70 factor, ECF subfamily	27.133	-3.28619	3.28619	2.27255e-08	3.8846e-07
PP_2751		conserved exported protein of unknown function	6.18435	-3.26535	3.26535	0.00682093	0.0226751
PP_5475		conserved protein of unknown function	21.1082	-3.21181	3.21181	0.00432115	0.0155873
PP_3147	potF-II	putrescine-binding periplasmic protein	95.3571	3.14147	3.14147	3.08815e-21	6.29389e-19
PP_3402		conserved protein of unknown function	219.634	-3.10834	3.10834	3.57773e-11	1.21528e-09
PP_1082	bfr-II	bacterioferritin	5031.45	3.10075	3.10075	8.87552e-24	2.76655e-21
PP_4656	pcaH	protocatechuate 3,4-dioxygenase beta chain	129.139	3.07466	3.07466	1.00495e-10	2.9917e-09
PP_5338	aspA	aspartate ammonia-lyase	913.351	-3.06455	3.06455	1.90046e-14	1.14438e-12
PP_5382		putative exported protein	50.8083	3.05262	3.05262	6.73297e-18	7.43291e-16
PP_4655	pcaG	protocatechuate 3,4-dioxygenase alpha chain	137.891	3.04753	3.04753	6.3768e-10	1.60145e-08
PP_0704		RNA polymerase sigma-70 factor, ECF subfamily	57.1855	-3.03779	3.03779	9.7518e-10	2.31726e-08
PP_3823		Cytochrome c-type protein	413.342	3.02685	3.02685	8.15559e-18	8.81969e-16
PP_5381		hypothetical protein	6.01473	-3.02585	3.02585	0.00343092	0.0129306
PP_3614		conserved membrane protein of unknown function	6.03804	-3.02209	3.02209	0.0121903	0.0372412
PP_3060		putative tail sheath protein	4.05434	3.00667	3.00667	0.0129138	0.0391029
PP_3869		putative Phage sheath protein	16.2938	2.99971	2.99971	9.02381e-07	1.00246e-05
PP_0352		RNA polymerase sigma-70 factor, ECF subfamily	54.0782	-2.98372	2.98372	5.14999e-13	2.43659e-11
PP_5454		conserved membrane protein of unknown function	13.8248	-2.96011	2.96011	0.000607674	0.00295962
PP_2275		conserved protein of unknown function	9.21156	-2.9574	2.9574	0.0165153	0.0477959
PP_0683		conserved protein of unknown function	103.579	-2.86412	2.86412	1.86398e-10	5.1444e-09
PP_1743	actP-I	acetate permease	1718.6	2.86143	2.86143	0.017247	0.0495616
PP_5747	pntAB	pyridine nucleotide transhydrogenase subunit	169.031	2.85743	2.85743	2.64272e-12	1.04506e-10
PP_4637		5-methyltetrahydropteroyltriglutamate-	460.76	2.85383	2.85383	4.69391e-11	1.51665e-09
PP_4604		putative permease of the drug	228.835	-2.84848	2.84848	7.61445e-10	1.88547e-08
PP_3749		conserved protein of unknown function	28.0671	-2.84281	2.84281	0.000159574	0.000947961
PP_2698	metE	5-methyltetrahydropteroyltriglutamate-	140.986	2.83519	2.83519	3.22974e-12	1.24017e-10
PP_3822		Cytochrome c family protein	1193.19	2.83152	2.83152	1.70219e-07	2.34169e-06
PP_1123		conserved protein of unknown function	23.7574	-2.81523	2.81523	1.0987e-05	9.07105e-05
PP_0156	pntAA	pyridine nucleotide transhydrogenase subunit	1560.41	2.80689	2.80689	4.25041e-22	9.79258e-20
PP_5409	glmS	L-glutamine	863.384	2.77531	2.77531	5.07117e-70	8.95738e-67
PP_2357		putative Type 1 pili protein CsuB	1699.17	-2.7497	2.7497	2.67982e-22	6.4547e-20
PP_1419	opdH	tricarboxylate-specific outer membrane porin	80.2606	2.74162	2.74162	0.000906331	0.00420179
PP_3449		conserved exported protein of unknown function	71.9448	-2.73691	2.73691	5.15536e-07	6.08425e-06
PP_0109		conserved membrane protein of unknown function	82.7535	-2.73444	2.73444	2.30198e-08	3.92012e-07
PP_2699		conserved protein of unknown function	186.034	2.69144	2.69144	1.32682e-08	2.39144e-07
PP_2090	cobA	Uroporphyrinogen-III C-methyltransferase	7.31159	-2.6869	2.6869	0.0086706	0.0278588
PP_0685		conserved protein of unknown function	52.3982	-2.68018	2.68018	4.86155e-07	5.77033e-06
PP_1059	ytnA	Uncharacterized amino acid permease YtnA	253.618	2.67521	2.67521	1.29652e-18	1.7616e-16
PP_1840		conserved protein of unknown function	208.282	-2.6498	2.6498	2.33185e-09	5.2137e-08
PP_1005	hemO	Heme oxygenase	71.1934	-2.6392	2.6392	2.72454e-09	5.94129e-08
PP_0642		conserved membrane protein of unknown function	5.28034	2.63542	2.63542	0.0169807	0.0489557
PP_2621		conserved protein of unknown function	9.96043	-2.63405	2.63405	0.0102978	0.0321936
PP_0536		conserved protein of unknown function	222.664	-2.63296	2.63296	3.37051e-10	8.84176e-09
PP_4194	gltA	citrate synthase	11480.5	2.61308	2.61308	4.20595e-17	4.12728e-15
PP_4070		conserved protein of unknown function	128.766	-2.60433	2.60433	5.99881e-08	9.38988e-07
PP_2007		P-47-related protein	277.568	-2.58914	2.58914	7.18242e-13	3.2254e-11
PP_3326		conserved exported protein of unknown function	42.6634	2.57573	2.57573	2.99771e-07	3.80932e-06
PP_5541		conserved protein of unknown function	14.7399	-2.57009	2.57009	0.00322826	0.0123076
PP_1249		conserved protein of unknown function, DUF4223	9.90622	2.55554	2.55554	0.00823933	0.0267035
PP_0155	pntB	pyridine nucleotide transhydrogenase, beta	2677.67	2.54884	2.54884	1.10616e-44	9.76924e-42
PP_1389		Oxaloacetate decarboxylase	468.787	-2.54568	2.54568	2.68642e-18	3.31055e-16
PP_3387		protein of unknown function	170.564	-2.54347	2.54347	5.19809e-14	2.86923e-12
PP_2057	yraO	Uncharacterized transporter YraO	12.5267	-2.54342	2.54342	0.0011724	0.00523825
PP_3553		AMP-binding domain protein	90.5066	2.53223	2.53223	0.000375046	0.00194269
PP_1064		Hydrolase, alpha	10.7494	-2.53131	2.53131	0.00183048	0.00764358
PP_1185	oprH	Outer membrane protein H1	6411.82	2.50321	2.50321	8.62351e-14	4.48e-12
PP_1651		two-component response regulator	137.903	-2.50229	2.50229	1.30264e-08	2.36394e-07
PP_2634		putative Cellulose synthase	7.35592	2.48905	2.48905	0.0134013	0.0401891
PP_3179		Transcriptional regulator, LysR family	51.6629	2.48225	2.48225	8.23126e-09	1.57135e-07
PP_3086		putative RNA polymerase sigma-70 factor	69.5428	-2.45889	2.45889	1.93924e-12	8.02813e-11
PP_1640	yohC	putative inner membrane protein of unknown	189.832	-2.45826	2.45826	1.74217e-11	6.32311e-10
PP_1171	udh	uronate dehydrogenase	17.9127	2.43581	2.43581	0.000149245	0.000896653
PP_1144		conserved membrane protein of unknown function	934.984	-2.43223	2.43223	7.5795e-13	3.37511e-11
PP_3438		conserved membrane protein of unknown function	33.5278	-2.42699	2.42699	8.39204e-06	7.20736e-05
PP_5588		conserved protein of unknown function	11.6794	-2.42363	2.42363	0.00765303	0.0250484
PP_1408		(R)-3-hydroxydecanoyl-ACP:CoA transacylase	7776.21	-2.40728	2.40728	2.17752e-16	1.95571e-14
PP_0107		conserved protein of unknown function	48.1547	-2.40169	2.40169	2.01592e-07	2.69756e-06
PP_0351		putative Transmembrane sensor protein	95.6544	-2.40144	2.40144	4.942e-10	1.2651e-08
PP_2900		conserved protein of unknown function	170.204	-2.39929	2.39929	2.90853e-08	4.81635e-07
PP_0806		putative Surface adhesion protein	83200.4	-2.38985	2.38985	4.59495e-11	1.49378e-09
PP_3388		conserved protein of unknown function	515.83	-2.38638	2.38638	3.53942e-15	2.40454e-13
PP_4617	ldh	leucine dehydrogenase	439.053	-2.36916	2.36916	6.16041e-14	3.29738e-12
PP_3843		conserved protein of unknown function	15.6131	-2.36437	2.36437	0.00430614	0.015565
PP_2374		conserved protein of unknown function	21.7197	-2.34344	2.34344	0.000951405	0.00436871
PP_0972		UPF0213 protein PP_0972	21.1807	-2.34016	2.34016	0.000910421	0.00421103
PP_4422	gabD-II	succinate-semialdehyde dehydrogenase (NADP+)	982.538	2.33465	2.33465	0.000236826	0.00133016
PP_5406		transposase	122.992	2.33419	2.33419	1.15654e-18	1.61277e-16
PP_3875		conserved protein of unknown function	5.87908	2.32972	2.32972	0.0147448	0.0435037
PP_2732		conserved protein of unknown function	696.436	-2.32309	2.32309	1.03616e-15	8.07446e-14
PP_1415		putative membrane associated enzyme subunit	20.6188	2.32149	2.32149	0.00041622	0.00213923
PP_2006		conserved membrane protein of unknown function	2289.59	-2.31821	2.31821	2.61507e-08	4.37137e-07
PP_2558		putative Outer membrane efflux protein	80.2561	-2.3157	2.3157	3.88787e-10	1.00009e-08
PP_4282	aqpZ	Aquaporin Z	344.307	-2.30807	2.30807	3.78349e-17	3.78278e-15
PP_3419		Sigma-54 dependent transcriptional	409.964	-2.2934	2.2934	3.24148e-09	6.84327e-08
PP_5410		Transcriptional regulator, DeoR family	130.066	2.28866	2.28866	9.95251e-13	4.32281e-11
PP_3288		Universal stress protein family	2537.24	-2.28781	2.28781	3.99952e-11	1.33292e-09
PP_2363		conserved protein of unknown function	278.816	-2.28211	2.28211	3.46202e-11	1.18356e-09
PP_4611		RNA polymerase sigma-70 factor, ECF subfamily	34.5959	-2.26054	2.26054	7.4609e-05	0.000487488
PP_2359		putative Type 1 pili subunit CsuA	904.478	-2.25336	2.25336	2.38543e-09	5.28229e-08
PP_3294		Universal stress protein family	349.161	-2.24258	2.24258	1.51703e-15	1.1012e-13
PP_3386	vgrG-II	type 6 secretion system protein	952.623	-2.23607	2.23607	1.43439e-15	1.07054e-13
PP_2362		putative usher protein	1178.14	-2.23354	2.23354	2.86438e-15	1.97121e-13
PP_0320		Methyl-accepting chemotaxis transducer	134.854	2.22742	2.22742	1.30178e-08	2.36394e-07
PP_3085		putative Transmembrane sensor	38.6627	-2.2073	2.2073	1.7288e-05	0.000134918
PP_2942		Response regulator	1978.56	-2.20618	2.20618	4.88805e-21	8.93165e-19
PP_1775		Metallo-beta-lactamase family protein	346.809	-2.20594	2.20594	2.37162e-18	2.99219e-16
PP_2632	bcsG	putative endoglucanase	24.9468	2.20593	2.20593	3.76306e-06	3.56716e-05
PP_5598		conserved protein of unknown function	93.4541	-2.20237	2.20237	5.20266e-05	0.000358038
PP_0703		putative Transmembrane sensor	85.7929	-2.20213	2.20213	2.23204e-05	0.000169693
PP_0897		Fumarate hydratase, class I	6735.32	2.18968	2.18968	1.79591e-14	1.10657e-12
PP_2537		conserved protein of unknown function	68.9431	-2.18645	2.18645	1.11653e-07	1.66194e-06
PP_3440		conserved protein of unknown function	412.352	-2.18062	2.18062	8.17339e-24	2.70692e-21
PP_4154		putative class 3 aminotransferase	576.456	2.17919	2.17919	6.59545e-41	4.36866e-38
PP_2745		Universal stress protein family	461.594	-2.16913	2.16913	1.31247e-14	8.37927e-13
PP_3517		conserved exported protein of unknown function	105.269	-2.1676	2.1676	2.87782e-08	4.78042e-07
PP_3292		conserved membrane protein of unknown function	196.624	-2.16446	2.16446	5.42439e-13	2.52139e-11
PP_2010		Cytochrome b561	462.574	2.15443	2.15443	1.56483e-18	2.02245e-16
PP_3151	sad-II	NAD+-dependent succinate semialdehyde	50.5815	2.15001	2.15001	5.95941e-10	1.51095e-08
PP_2759	rbsA-II	ribose ABC transporter - ATP-binding subunit	14.9422	-2.1459	2.1459	0.00830709	0.0268902
PP_4188	sucB	2-oxoglutarate dehydrogenase	10468.2	2.13866	2.13866	9.68238e-17	8.84602e-15
PP_2076		conserved protein of unknown function	504.966	-2.12962	2.12962	9.53791e-10	2.27664e-08
PP_3554		Acyl-CoA dehydrogenase family protein	77.4778	2.12642	2.12642	1.55854e-07	2.17907e-06
PP_0482	bfr-I	bacterioferritin	2457.1	2.12617	2.12617	5.9408e-13	2.71382e-11
PP_1416		putative Tricarboxylate transport protein TctA	90.6769	2.11371	2.11371	1.85597e-05	0.000143573
PP_4189	sucA	2-oxoglutarate decarboxylase, thiamine-requiring	27537	2.1018	2.1018	3.35646e-21	6.58736e-19
PP_1661		putative Dehydrogenase subunit	2753.31	-2.09915	2.09915	8.18759e-07	9.15317e-06
PP_2124		putative Glycosyl transferase	187.846	-2.09741	2.09741	2.56933e-10	6.80744e-09
PP_5405		transposase	371.346	2.09665	2.09665	7.2848e-16	5.76152e-14
PP_3340		putative TonB-dependent receptor	71.352	2.07933	2.07933	1.04387e-12	4.49711e-11
PP_1004		conserved protein of unknown function	19.1202	-2.078	2.078	4.7219e-05	0.000329228
PP_0106		cytochrome c oxidase subunit 3	148.485	-2.07499	2.07499	1.53212e-06	1.61086e-05
PP_4495	aroP-II	aromatic amino acid transport protein	505.185	2.07451	2.07451	3.06063e-12	1.18381e-10
PP_3764	opdN	outer-membrane porin D	211.029	2.07323	2.07323	0.00361835	0.0135121
PP_3609		conserved membrane protein of unknown function	42.0482	-2.07276	2.07276	1.61611e-07	2.23597e-06
PP_2381		conserved protein of unknown function	453.323	-2.07213	2.07213	0.00471644	0.0167847
PP_1458	yhjE	putative inner membrane metabolite transport	335.953	2.06597	2.06597	2.33781e-08	3.95784e-07
PP_2192		putative RNA polymerase sigma-70 factor, ECF	181.063	-2.05678	2.05678	4.57749e-12	1.72029e-10
PP_3503		Sigma-54 dependent transcriptional regulator	124.762	-2.05384	2.05384	2.9099e-12	1.14219e-10
PP_1446		TonB-dependent receptor	54.2647	2.05237	2.05237	1.51891e-07	2.13991e-06
PP_3146		putative Oxidoreductase	66.1829	2.04002	2.04002	1.45837e-08	2.60199e-07
PP_2731		conserved protein of unknown function	38.9384	-2.03782	2.03782	0.000754394	0.00358523
PP_1849		conserved protein of unknown function	736.432	-2.03729	2.03729	2.86951e-14	1.65278e-12
PP_2573		conserved protein of unknown function	50.7776	-2.03552	2.03552	0.000165214	0.000974869
PP_0864	speC	ornithine decarboxylase	1357.61	2.02713	2.02713	1.38266e-18	1.83168e-16
PP_5433		putative NADH:ubiquinone oxidoreductase subunit	540.525	-2.02505	2.02505	6.88115e-14	3.61022e-12
PP_2744		Ribose-phosphate pyrophosphokinase family	309.194	-2.02321	2.02321	3.00778e-14	1.71379e-12
PP_0711	ycaC-I	putative hydrolase	592.629	-2.02304	2.02304	2.97951e-16	2.58826e-14
PP_5613		protein of unknown function	146.137	-2.02261	2.02261	8.99097e-11	2.73811e-09
PP_1455		conserved protein of unknown function	18.7524	-2.02215	2.02215	0.0099835	0.0313218
PP_0425	yhfA	conserved protein of unknown function	143.967	2.02054	2.02054	6.96206e-15	4.61149e-13
PP_1102		conserved protein of unknown function	24.5516	-2.01062	2.01062	0.000185995	0.00108188
PP_2149	gapB	glyceraldehyde-3-phosphate dehydrogenase	11742.3	2.00875	2.00875	1.94083e-38	9.34953e-36
PP_4491	phhB	pterin-4-alpha-carbinolamine dehydratase	23.9434	2.00816	2.00816	0.000602289	0.00293879
PP_4364		putative Anti-sigma F factor antagonist	228.827	-2.00733	2.00733	2.70976e-07	3.49368e-06
PP_3389		conserved membrane protein of unknown function	190.472	-2.00661	2.00661	8.81095e-17	8.33736e-15
PP_3230		Phosphoribosyl transferase domain protein	290.205	-2.00467	2.00467	5.95622e-18	6.8613e-16
PP_2696	metR-II	DNA-binding transcriptional regulator,	16.5442	1.9977	1.9977	0.000244791	0.00136686
PP_2560	aprDA	alkaline protease secretion transporter	78.9459	-1.99282	1.99282	5.45197e-09	1.09019e-07
PP_2729		conserved protein of unknown function	529.034	-1.99174	1.99174	9.82142e-21	1.62637e-18
PP_4616		conserved protein of unknown function	19.3752	-1.9894	1.9894	0.00927407	0.0294095
PP_1192		Acetyltransferase, GNAT family	112.933	-1.98912	1.98912	9.99556e-11	2.9917e-09
PP_3289		Acetyltransferase, GNAT family	439.709	-1.98155	1.98155	3.88541e-11	1.30309e-09
PP_0161		putative transmembrane sensor	71.7238	-1.9756	1.9756	2.2064e-06	2.25274e-05
PP_2326		Universal stress protein	228.704	-1.97148	1.97148	6.2103e-08	9.67893e-07
PP_4191	sdhA	succinate dehydrogenase flavoprotein subunit	13927.1	1.95982	1.95982	7.64024e-21	1.30599e-18
PP_1251	mqo-II	malate:quinone oxidoreductase	1265.58	-1.95895	1.95895	5.43727e-09	1.09019e-07
PP_2361		putative chaperone protein	586.31	-1.95583	1.95583	1.95022e-07	2.6229e-06
PP_0687	ispB	octaprenyl diphosphate synthase	900.254	1.95394	1.95394	3.5775e-16	3.00908e-14
PP_3598		Peptidase C26	109.907	1.95142	1.95142	8.28242e-15	5.41834e-13
PP_4488		conserved exported protein of unknown function	177.669	1.94965	1.94965	9.24156e-11	2.78244e-09
PP_1364		conserved exported protein of unknown function	923.868	-1.94901	1.94901	2.94404e-11	1.01964e-09
PP_5008		Poly granule-associated protein	646.327	-1.94815	1.94815	7.55282e-32	3.07864e-29
PP_2569		Metabolite MFS transporter, MHS family	194.038	-1.94643	1.94643	7.51662e-09	1.44838e-07
PP_2927		conserved protein of unknown function	115.826	-1.94311	1.94311	1.34929e-10	3.88581e-09
PP_2358		putative Type 1 pili subunit CsuA	350.263	-1.94055	1.94055	1.25446e-10	3.65242e-09
PP_1659		conserved exported protein of unknown function	1271.38	-1.93014	1.93014	5.83576e-06	5.23243e-05
PP_3237		Universal stress protein family	640.555	-1.92716	1.92716	9.50691e-17	8.83809e-15
PP_3683		conserved protein of unknown function	316.51	-1.92335	1.92335	3.45661e-16	2.95428e-14
PP_4665		conserved protein of unknown function	16.4919	-1.92139	1.92139	0.00960329	0.0302884
PP_3231		conserved protein of unknown function	545.515	-1.91728	1.91728	5.69255e-07	6.60062e-06
PP_1467		NhaP-type Na+(K+)	196.262	-1.91066	1.91066	1.2741e-09	2.97422e-08
PP_2828		conserved protein of unknown function	43.6962	-1.90595	1.90595	5.81925e-07	6.73279e-06
PP_4521		putative aerotaxis receptor	1230.4	-1.90354	1.90354	1.46079e-15	1.0751e-13
PP_2164		conserved protein of unknown function	73.6038	-1.90323	1.90323	1.42693e-06	1.51833e-05
PP_1083		(2Fe-2S)-binding protein	39.8815	-1.90099	1.90099	2.26448e-06	2.29993e-05
PP_2112	acnA-I	aconitate hydratase 1	2716.48	-1.90099	1.90099	3.47275e-08	5.63885e-07
PP_3631	htrG	putative signal transduction protein	90.245	1.89318	1.89318	1.44842e-05	0.000115416
PP_0150		conserved exported protein of unknown function	24.4505	1.89263	1.89263	0.0071229	0.0234893
PP_3385		conserved protein of unknown function	268.791	-1.89216	1.89216	1.21943e-13	6.27354e-12
PP_2360		putative type 1 pili subunit CsuA	415.915	-1.88819	1.88819	3.17385e-06	3.08591e-05
PP_2339	acnB	bifunctional aconitate hydratase 2 and	23001.5	1.88811	1.88811	6.70783e-16	5.38557e-14
PP_1625	fdxA	Ferredoxin 1	418.837	1.88785	1.88785	2.15762e-06	2.21145e-05
PP_5535		conserved membrane protein of unknown function	46.8414	-1.88752	1.88752	0.000217196	0.00123357
PP_0201		conserved protein of unknown function	524.518	-1.88685	1.88685	8.45311e-09	1.60548e-07
PP_4363		Sensor histidine kinase	1993.29	-1.8789	1.8789	1.96955e-14	1.17266e-12
PP_1660		conserved protein of unknown function	308.238	-1.87628	1.87628	1.78725e-06	1.86064e-05
PP_0091		putative lipoprotein	118.665	-1.87343	1.87343	3.58349e-05	0.000257651
PP_3873		conserved protein of unknown function	10.4039	1.8719	1.8719	0.00531338	0.0184991
PP_4192	sdhD	succinate dehydrogenase hydrophobic membrane	603.855	1.86433	1.86433	1.45911e-40	8.59094e-38
PP_3420		Sensor histidine kinase	126.986	-1.85982	1.85982	1.33227e-06	1.42909e-05
PP_3836		conserved protein of unknown function	22.2169	-1.85955	1.85955	0.017201	0.0494565
PP_4052	malQ	4-alpha-glucanotransferase	1682.6	-1.85762	1.85762	1.65427e-07	2.28281e-06
PP_2730		putative Lipoprotein	276.744	-1.85604	1.85604	2.21253e-10	5.98175e-09
PP_4421		putative aminotransferase	2174.95	1.85184	1.85184	5.74385e-06	5.15876e-05
PP_1186	phoP	two component system DNA-binding transcriptional	1107.55	1.85183	1.85183	4.07028e-30	1.44022e-27
PP_2779		putative Beta-ketoacyl synthase	10.1867	-1.84844	1.84844	0.0103573	0.0323604
PP_4208		RNA polymerase sigma-70 factor, ECF subfamily	96.377	-1.84611	1.84611	2.26565e-06	2.29993e-05
PP_0415	rpe	ribulose-5-phosphate 3-epimerase	1582.86	1.84536	1.84536	1.36273e-15	1.03158e-13
PP_0151		conserved exported protein of unknown function	12.8604	1.8448	1.8448	0.00548424	0.0190314
PP_2955		Magnesium	31.5287	-1.84281	1.84281	5.16816e-05	0.000356646
PP_1033		Sulfatase domain protein	873.999	-1.84144	1.84144	2.54315e-11	9.04439e-10
PP_3343	nikB	nickel ABC transporter permease subunit	42.655	1.84108	1.84108	9.85525e-06	8.25008e-05
PP_2578		conserved exported protein of unknown function	34.0702	-1.84093	1.84093	0.00355101	0.01327
PP_2863		conserved membrane protein of unknown function	34.0188	-1.84052	1.84052	0.0153325	0.0448629
PP_1811	rffE	UDP-N-acetylglucosamine-2-epimerase	200.112	-1.83816	1.83816	6.02326e-11	1.91121e-09
PP_0104	ctaD	Cytochrome c oxidase subunit 1	320.471	-1.83375	1.83375	1.57584e-07	2.19746e-06
PP_5451		protein of unknown function	519.963	-1.83289	1.83289	1.10659e-06	1.21273e-05
PP_5402		deacetylase of acetyl-CoA synthetase,	37.06	-1.82974	1.82974	3.38146e-06	3.25197e-05
PP_2559	hasE	Metalloprotease secretion protein	60.5001	-1.82748	1.82748	6.26e-07	7.14908e-06
PP_2941		conserved protein of unknown function	397.02	-1.82634	1.82634	2.42762e-12	9.8198e-11
PP_3232		Acetyltransferase, GNAT family	1868.88	-1.82498	1.82498	7.02598e-09	1.35878e-07
PP_2151	sthA	soluble pyridine nucleotide transhydrogenase	1848.55	1.81866	1.81866	3.33661e-09	7.01615e-08
PP_4109		conserved protein of unknown function	27.2567	1.81654	1.81654	1.1891e-05	9.70884e-05
PP_3059		putative tail sheath protein	19.1301	1.80145	1.80145	0.0125326	0.0381231
PP_0147	citN	Citrate transporter	19.3684	1.79627	1.79627	0.00330152	0.01255
PP_4053	treY	maltooligosyl trehalose synthase	2105.42	-1.79158	1.79158	6.23314e-10	1.57283e-08
PP_4538	azoR2	FMN-dependent NADH-azoreductase 2	20.2419	1.79033	1.79033	5.7324e-05	0.000387943
PP_4217	fpvA	outer membrane ferripyoverdine receptor FpvA,	4962.86	-1.78728	1.78728	0.00287505	0.0111611
PP_3287	fnrC	transcriptional regulator with 4Fe-4S cluster;	521.346	-1.7844	1.7844	2.19035e-14	1.28963e-12
PP_3576		putative Transmembrane sensor	34.3702	-1.7799	1.7799	0.00237589	0.00950179
PP_3722	alr	Alanine racemase	1063.9	1.77906	1.77906	1.18796e-21	2.62291e-19
PP_4959		diguanylate cyclase	5460.4	-1.77726	1.77726	2.07201e-19	2.96745e-17
PP_2685		conserved protein of unknown function	11.207	-1.77119	1.77119	0.00840975	0.0272048
PP_2432	nfnB	6,7-dihydropteridine reductase	362.704	1.77	1.77	1.32259e-22	3.50421e-20
PP_3291		Metallo-beta-lactamase family protein	1004.31	-1.76541	1.76541	1.87514e-14	1.14211e-12
PP_5247		conserved protein of unknown function	98.5176	-1.7647	1.7647	5.34748e-08	8.45859e-07
PP_1635		DNA-binding response regulator	260.268	1.76037	1.76037	1.76147e-14	1.09812e-12
PP_1008		RNA polymerase subunit sigma-24	20.2339	-1.75479	1.75479	0.000338495	0.00179368
PP_4016	purB	5'-phosphoribosyl-4-(N-succinocarboxamide)-5-	1801.6	1.75099	1.75099	6.45089e-16	5.25897e-14
PP_4010	cspD	DNA replication inhibitor	320.995	-1.74747	1.74747	6.74108e-06	5.92388e-05
PP_3878		putative Phage minor capsid protein C	19.271	1.74368	1.74368	0.000473434	0.00238926
PP_3799		conserved exported protein of unknown function	51.8078	-1.74277	1.74277	1.5058e-05	0.00011945
PP_0349		putative Membrane protein	13.7832	-1.74214	1.74214	0.00353406	0.0132253
PP_2769		putative Branched-chain amino acid ABC	79.5474	-1.74084	1.74084	1.21478e-05	9.88807e-05
PP_5376		conserved exported protein of unknown function	14.9474	1.74046	1.74046	0.00153571	0.00659993
PP_2426	calA	coniferyl alcohol dehydrogenase	65.5992	-1.73853	1.73853	2.26855e-05	0.000171975
PP_5323		Peptidase, M23	284.465	-1.73637	1.73637	6.50388e-07	7.41163e-06
PP_4415		conserved protein of unknown function	874.408	-1.73401	1.73401	2.38578e-10	6.3529e-09
PP_4101		Acetyltransferase, GNAT family	43.9663	-1.73122	1.73122	5.14034e-05	0.000355596
PP_4187	lpdG	dihydrolipoyl dehydrogenase	18355.1	1.72898	1.72898	1.67946e-21	3.55978e-19
PP_3243		Acetyltransferase, GNAT family	15.8036	1.72811	1.72811	0.00321764	0.0123076
PP_4423		conserved protein of unknown function	94.2576	1.72753	1.72753	8.15853e-08	1.24948e-06
PP_5312		conserved exported protein of unknown function	58.0611	1.72511	1.72511	6.22403e-07	7.13878e-06
PP_2127		Sensor histidine kinase	23.4671	1.72376	1.72376	0.000970628	0.00444542
PP_3522		conserved protein of unknown function	22.3256	-1.72227	1.72227	0.00318536	0.0122136
PP_3313		putative Heat shock protein	42.2844	-1.72049	1.72049	0.00109036	0.00490893
PP_3100		conserved protein of unknown function	253.83	1.7201	1.7201	2.94998e-13	1.42109e-11
PP_4193	sdhC	succinate dehydrogenase membrane b-556 subunit	2092.89	1.72003	1.72003	7.14786e-11	2.22803e-09
PP_0529	xseB	Exodeoxyribonuclease 7 small subunit	20.5631	1.71973	1.71973	0.000185695	0.00108188
PP_4553		RNA polymerase sigma-70 factor, ECF subfamily	168.538	-1.71019	1.71019	1.3479e-08	2.42119e-07
PP_0924		conserved protein of unknown function	16.2709	-1.70571	1.70571	0.00636069	0.0215094
PP_4178		Dienelactone hydrolase family protein	780.074	1.69876	1.69876	3.38607e-12	1.29085e-10
PP_4190	sdhB	succinate dehydrogenase iron-sulfur subunit	5064.49	1.69124	1.69124	1.51834e-20	2.43809e-18
PP_5732		putative metal-binding protein	258.347	1.68527	1.68527	7.41568e-10	1.85192e-08
PP_5408		conserved protein of unknown function	124.952	1.67524	1.67524	1.85138e-07	2.49629e-06
PP_0667		RNA polymerase sigma-70 factor, ECF subfamily	98.3536	-1.67416	1.67416	5.14267e-06	4.67881e-05
PP_2965	tnpC	putative tnpA repressor TnpC	16.7044	-1.67182	1.67182	0.0129294	0.0391278
PP_1592	tsf	Elongation factor Ts	8366.64	1.67013	1.67013	4.75341e-18	5.72462e-16
PP_1868	deaD	ATP-dependent DEAD-box RNA helicase DeaD	1025.57	1.66609	1.66609	1.60773e-12	6.7614e-11
PP_2276		putative phage exonuclease	29.2046	-1.66588	1.66588	0.00024831	0.0013848
PP_1297	yhdW	putative amino-acid ABC transporter-binding	389.353	1.66512	1.66512	0.00488106	0.0172202
PP_0700		putative Transmembrane sensor	87.5237	-1.66101	1.66101	1.53207e-05	0.00012099
PP_4279	xdhB	xanthine dehydrogenase subunit XdhB	813.902	-1.65763	1.65763	4.4869e-07	5.3914e-06
PP_5380	copA-II	copper resistance protein A	1273.98	1.65722	1.65722	1.98093e-12	8.1334e-11
PP_4886		conserved protein of unknown function	433.849	-1.65615	1.65615	2.88529e-16	2.54819e-14
PP_4051	treZ	malto-oligosyltrehalose trehalohydrolase	1649.07	-1.65568	1.65568	3.74518e-11	1.26406e-09
PP_4568		putative metabolite efflux pump	20.9952	1.65231	1.65231	0.000589602	0.00288486
PP_0154	scpC	propionyl-CoA:succinate CoA transferase	3424.28	1.64764	1.64764	1.35765e-11	4.96151e-10
PP_0722	prs	Ribose-phosphate pyrophosphokinase	3955.69	1.64112	1.64112	1.88202e-09	4.24376e-08
PP_1657	mazG	modified nucleoside triphosphate	377.499	-1.6402	1.6402	1.8115e-13	9.14201e-12
PP_1412		3-hydroxyisobutyryl-CoA hydrolase	471.972	-1.63757	1.63757	1.01302e-08	1.89683e-07
PP_5377		conserved hypothetical protein	211.208	1.63574	1.63574	1.19684e-09	2.81868e-08
PP_4600	moaB-II	molybdenum cofactor biosynthesis protein B	17.003	-1.63514	1.63514	0.0105919	0.0330157
PP_1154		Sensory box protein	413.192	-1.63473	1.63473	5.50106e-14	3.00517e-12
PP_3344	nikC	nickel ABC transporter permease subunit	38.7682	1.63425	1.63425	0.000101104	0.000646262
PP_3342	nikA	nickel ABC transporter periplasmic binding	274.046	1.63209	1.63209	7.60513e-08	1.17492e-06
PP_3798		conserved protein of unknown function	63.7524	-1.6295	1.6295	4.03856e-06	3.78767e-05
PP_2075		conserved membrane protein of unknown function	57.7474	-1.62722	1.62722	1.09693e-05	9.07105e-05
PP_5276		Phospholipase D family protein	63.5135	1.62566	1.62566	8.24371e-09	1.57135e-07
PP_1954		conserved protein of unknown function	31.897	1.62429	1.62429	0.00244064	0.00970942
PP_3579		conserved membrane protein of unknown function	41.6232	-1.62263	1.62263	4.77994e-05	0.000332837
PP_4763		GCN5-related N-acetyltransferase	22.2106	-1.62235	1.62235	0.0158192	0.0460674
PP_5211		ChaC-related protein	757.326	-1.62089	1.62089	6.30385e-14	3.34041e-12
PP_4137		putative Outer membrane siderophore receptor	76.9181	1.6194	1.6194	6.91224e-07	7.84324e-06
PP_3356	fcs	feruloyl-CoA-synthetase	39.7185	1.6184	1.6184	0.0030574	0.0118084
PP_3253		Carboxylate-amine ligase PP_3253	20.2171	-1.61358	1.61358	0.00105473	0.00477287
PP_3768		putative shikimate 5-dehydrogenase	682.767	-1.61159	1.61159	3.2203e-23	8.98125e-21
PP_1073	glpD	glycerol-3-phosphate dehydrogenase (aerobic)	332.015	-1.61049	1.61049	1.59456e-09	3.64206e-08
PP_5407		Transposition protein, TnsD-related protein	129.252	-1.60876	1.60876	4.95157e-08	7.8558e-07
PP_4244	pvdS	alternative sigma factor	182.094	-1.60604	1.60604	0.000285506	0.00157593
PP_2405		conserved exported protein of unknown function	29.3083	-1.6056	1.6056	0.000897496	0.00416812
PP_3931	yfbS	putative transporter	587.154	1.60402	1.60402	1.32667e-15	1.01884e-13
PP_3290		Universal stress protein family	1111.91	-1.60315	1.60315	1.99536e-12	8.1334e-11
PP_5419	atpB	ATP synthase subunit a	3700.15	1.60081	1.60081	3.2246e-14	1.81778e-12
PP_3421		Sensor histidine kinase	323.922	-1.59752	1.59752	1.07323e-11	3.97697e-10
PP_4556		conserved protein of unknown function	38.9073	-1.59485	1.59485	0.000441313	0.00225508
PP_2506		conserved membrane protein of unknown function	18.9179	-1.5872	1.5872	0.00493424	0.0173731
PP_4017		conserved protein of unknown function	424.361	1.58016	1.58016	2.67688e-13	1.30136e-11
PP_1369		conserved protein of unknown function	242.768	-1.57553	1.57553	1.254e-07	1.81556e-06
PP_2572		conserved protein of unknown function	207.568	-1.57417	1.57417	0.000107824	0.000677768
PP_2709		putative Long-chain-fatty-acid--CoA ligase	77.4959	-1.57287	1.57287	1.43317e-05	0.000114892
PP_1187	phoQ	sensor protein	349.793	1.57122	1.57122	5.21284e-11	1.67411e-09
PP_3992	xanP	xanthine permease	72.9841	1.56486	1.56486	1.9913e-07	2.67137e-06
PP_3397		conserved exported protein of unknown function	21.1953	-1.5648	1.5648	0.00400414	0.0147041
PP_4362		conserved protein of unknown function	175.445	-1.5641	1.5641	2.57032e-06	2.57826e-05
PP_3782		conserved protein of unknown function	228.357	1.56307	1.56307	4.7956e-05	0.000333427
PP_0621		conserved protein of unknown function	51.0543	-1.56245	1.56245	0.00206982	0.00844988
PP_1445	oprB-II	carbohydrate-selective porin	233.026	-1.56055	1.56055	2.48171e-15	1.75341e-13
PP_1466		Long-chain acyl-CoA thioester hydrolase family	16.1991	1.55658	1.55658	0.00793648	0.0258643
PP_2661		conserved protein of unknown function	27.3065	-1.55245	1.55245	0.00114439	0.00512607
PP_3236		putative Lipoprotein OprI	66.7196	-1.54733	1.54733	0.00137099	0.00600402
PP_3741	mrdA-I	transpeptidase (penicillin-binding protein 2)	32.3498	1.54527	1.54527	0.000395977	0.00204312
PP_1006		putative outer membrane heme receptor	241.652	-1.54173	1.54173	0.000168704	0.000993289
PP_0298	gbdR	AraC-family transcriptional regulator	239.812	-1.54113	1.54113	5.28297e-07	6.19346e-06
PP_3296		putative transporter	253.284	-1.54092	1.54092	1.14403e-07	1.68864e-06
PP_3368		Major facilitator family transporter	202.628	-1.53185	1.53185	2.9958e-12	1.16726e-10
PP_0575		conserved membrane protein of unknown function	137.412	-1.53118	1.53118	7.82545e-08	1.20544e-06
PP_2945		putative sensor histidine kinase	1151.95	-1.53111	1.53111	8.97449e-10	2.15589e-08
PP_1478		putative Xenobiotic reductase	1847.64	-1.53085	1.53085	2.01365e-08	3.50998e-07
PP_2637	bcsZ	endo-1,4-D-glucanase subunit of cellulose	19.7107	1.52996	1.52996	0.0018742	0.00778933
PP_4471	mgtE	Magnesium transporter	305.838	1.52881	1.52881	4.0347e-08	6.47876e-07
PP_2925	mqo-III	malate:quinone oxidoreductase	467.538	-1.52785	1.52785	1.31945e-09	3.06655e-08
PP_3441		conserved protein of unknown function	498.992	-1.5273	1.5273	3.32008e-14	1.85191e-12
PP_0760		conserved membrane protein of unknown function	16.2771	1.52625	1.52625	0.00575495	0.0198151
PP_1652	pfeS-II	histidine kinase	86.0549	-1.52522	1.52522	0.000960678	0.00440747
PP_0584		Methyl-accepting chemotaxis transducer	562.888	1.52214	1.52214	2.22752e-10	5.9917e-09
PP_3073	hbdH	3-hydroxybutyrate dehydrogenase	57.3836	-1.52062	1.52062	0.000162612	0.000962771
PP_4509		conserved protein of unknown function	23.7861	-1.51966	1.51966	0.00884804	0.0283298
PP_1373	pitB	phosphate transporter	770.025	1.51932	1.51932	2.5659e-08	4.30275e-07
PP_0105		Cytochrome C oxidase assembly protein	50.504	-1.51532	1.51532	0.0025683	0.0101563
PP_0654	mdh	putative malate dehydrogenase	320.461	-1.51431	1.51431	3.84835e-09	7.99702e-08
PP_0333		conserved exported protein of unknown function	167.118	1.51253	1.51253	4.07736e-06	3.81731e-05
PP_2922		Urea amidolyase-related protein	26.4712	-1.50941	1.50941	0.00157964	0.00675586
PP_4557		conserved exported protein of unknown function	83.8493	-1.50601	1.50601	1.43707e-05	0.000115031
PP_5072	ynfM	efflux transporter	222.794	-1.50498	1.50498	6.43701e-06	5.68495e-05
PP_2034		conserved membrane protein of unknown function	79.4921	-1.50402	1.50402	0.014587	0.0431103
PP_2768		putative Branched-chain amino acid ABC	102.487	-1.50367	1.50367	1.01351e-05	8.45761e-05
PP_5001	hslU	protease HslVU, ATPase component	1726.42	1.50333	1.50333	2.39176e-15	1.7127e-13
PP_3156		Universal stress protein family	372.722	-1.49927	1.49927	4.13715e-07	5.02815e-06
PP_3137		Glycosyl transferase, group 2 family protein	357.489	-1.49845	1.49845	4.1153e-07	5.02815e-06
PP_1291		PhoH family protein	5656.92	-1.49731	1.49731	5.25871e-07	6.1787e-06
PP_1985	leuC	3-isopropylmalate dehydratase large subunit	1864.51	1.49443	1.49443	1.96769e-13	9.83658e-12
PP_4836		conserved exported protein of unknown function	57.2266	1.49329	1.49329	2.9714e-06	2.93211e-05
PP_1312	zapE	putative enzyme with nucleoside triphosphate	549.027	1.49	1.49	2.95348e-09	6.31068e-08
PP_4621	hmgA	Homogentisate 1,2-dioxygenase	60.4448	1.48944	1.48944	0.000152801	0.000912842
PP_0454	rplC	50S ribosomal subunit protein L3	19427.6	1.48363	1.48363	4.05788e-09	8.39949e-08
PP_4323	ccmE	Cytochrome c-type biogenesis protein CcmE	219.746	1.48235	1.48235	1.9033e-10	5.22569e-09
PP_1844	plsC	1-acyl-sn-glycerol-3-phosphate acyltransferase	54.8387	1.47954	1.47954	1.52269e-06	1.60412e-05
PP_3773		conserved protein of unknown function	82.4894	1.47944	1.47944	0.000233238	0.00131622
PP_2462		conserved protein of unknown function	146.623	1.47821	1.47821	3.28e-06	3.17747e-05
PP_4688		Heme	76.9987	-1.47773	1.47773	6.43721e-05	0.000430148
PP_3781		Oxygen-independent Coproporphyrinogen III	10239.9	1.47747	1.47747	2.87315e-07	3.66909e-06
PP_5717		conserved protein of unknown function	96.0135	-1.47722	1.47722	0.000235344	0.00132528
PP_0103		cytochrome c oxidase subunit 2	445.229	-1.47686	1.47686	1.07206e-05	8.89022e-05
PP_5029	hutG	N-formylglutamate deformylase	67.7276	1.47667	1.47667	2.89973e-05	0.000211648
PP_2422		conserved protein of unknown function	953.431	-1.47655	1.47655	5.50725e-07	6.41382e-06
PP_2142	sulA	Cell division inhibitor SulA	65.5238	1.4759	1.4759	1.97959e-06	2.0448e-05
PP_3783	syrB	syringomycin biosynthesis enzyme 2	11019.2	1.47068	1.47068	2.8374e-09	6.08721e-08
PP_1690		conserved protein of unknown function	44.4395	-1.47038	1.47038	0.000222236	0.0012595
PP_0416		Phosphoglycolate phosphatase	478.161	1.46688	1.46688	2.7468e-15	1.91517e-13
PP_4418		conserved protein of unknown function	48.2745	-1.46197	1.46197	0.000287894	0.00158746
PP_5165	plpB	NLPA lipoprotein	481.858	1.46065	1.46065	2.66745e-11	9.3608e-10
PP_0684	fklB-I	FKBP-type peptidyl-prolyl cis-trans isomerase	594.416	1.45878	1.45878	1.10544e-08	2.05535e-07
PP_0668		putative Transmembrane sensor	74.3222	-1.45674	1.45674	0.000159547	0.000947961
PP_0418	estP	Esterase EstP	457.5	1.45315	1.45315	0.000190227	0.00110165
PP_4975		Long-chain acyl-CoA thioester hydrolase family	577.879	1.45254	1.45254	5.44392e-16	4.5074e-14
PP_3984		putative transposase	88.842	-1.44971	1.44971	0.0110622	0.0341601
PP_0319		conserved protein of unknown function	50.4346	1.44879	1.44879	0.00352664	0.0132147
PP_1727		Transcriptional regulator, GntR family	28.5015	-1.44875	1.44875	0.00812673	0.0263708
PP_1159		conserved membrane protein of unknown function	32.1403	-1.44799	1.44799	0.00128163	0.00567366
PP_2248		putative transporter	71.8812	-1.44714	1.44714	1.65592e-06	1.73414e-05
PP_0257	fdhD	protein sulfur transferase	91.5051	-1.44674	1.44674	4.69912e-07	5.63363e-06
PP_0903		conserved protein of unknown function	172.302	1.44451	1.44451	2.89532e-05	0.000211618
PP_0326	soxG	sarcosine oxidase subunit gamma	55.1518	-1.44449	1.44449	0.000317972	0.0017092
PP_3439		Transcriptional regulator, AraC family	139.837	-1.44179	1.44179	6.4904e-05	0.000432612
PP_2874		conserved protein of unknown function	563.524	-1.43943	1.43943	0.00122391	0.00544542
PP_1464	trmD	tRNA (guanine-N(1)-)-methyltransferase	5729.52	1.43581	1.43581	4.41274e-11	1.4434e-09
PP_3621	iorA-II	isoquinoline 1-oxidoreductase subunit alpha	127.458	-1.43424	1.43424	0.00023814	0.00133535
PP_1815	pyrF	Orotidine 5'-phosphate decarboxylase	216.202	1.43279	1.43279	7.64389e-07	8.56341e-06
PP_5074	hemE	Uroporphyrinogen decarboxylase	1166.82	1.43259	1.43259	3.81214e-21	7.21447e-19
PP_0803		Protein secretion ABC efflux system, membrane	868.239	-1.43245	1.43245	4.8579e-07	5.77033e-06
PP_2722		conserved protein of unknown function	46.4238	-1.43145	1.43145	0.00105736	0.00478066
PP_2242	fepA	ferric enterobactin transport system outer	49.9366	-1.42737	1.42737	2.22847e-05	0.000169665
PP_0322	glyA-I	serine hydroxymethyltransferase	169.135	-1.42689	1.42689	6.55453e-07	7.45332e-06
PP_1591	rpsB	30S ribosomal protein S2	11478	1.42486	1.42486	1.24339e-10	3.64353e-09
PP_3589	sdaC	serine:H+ symport permease,	73.0795	1.42381	1.42381	4.16604e-05	0.000293172
PP_5367		Transketolase domain protein	78.2379	-1.42205	1.42205	0.000375612	0.00194372
PP_2895		conserved protein of unknown function	32.8102	-1.4213	1.4213	0.00424606	0.0154174
PP_1370		Glycosyl transferase, group 1 family protein	302.476	-1.4194	1.4194	2.7359e-05	0.00020248
PP_4728	grpE	Protein GrpE	996.322	1.41884	1.41884	5.86726e-14	3.17251e-12
PP_4618		conserved protein of unknown function	202.728	-1.4188	1.4188	0.000321618	0.00172321
PP_3144	tdcG-III	L-serine dehydratase	186.11	-1.41849	1.41849	1.92225e-10	5.25052e-09
PP_4678	ilvC	Ketol-acid reductoisomerase	13495.5	1.41661	1.41661	8.84141e-07	9.84256e-06
PP_3735		ABC transporter ATP-binding protein	41.4792	-1.41626	1.41626	0.000374559	0.00194207
PP_3828	modA	Molybdate-binding periplasmic protein	160.943	1.41432	1.41432	1.22421e-06	1.32716e-05
PP_5740		protein of unknown function	20.5508	-1.41387	1.41387	0.0108108	0.0335401
PP_4524		putative Sodium-solute symporter	40.0239	-1.41384	1.41384	0.000103782	0.0006594
PP_3375	endA	endonuclease I	52.6585	1.41241	1.41241	0.000149154	0.000896653
PP_4554		conserved protein of unknown function	89.4995	-1.41143	1.41143	0.000662102	0.00318374
PP_0148		conserved protein of unknown function	106.938	-1.40718	1.40718	0.00228382	0.00916814
PP_4179	htpG	Chaperone protein HtpG	8923.77	1.40549	1.40549	8.80281e-15	5.68854e-13
PP_1465	rplS	50S ribosomal protein L19	1461.29	1.40427	1.40427	2.57388e-06	2.57826e-05
PP_5046	glnA	glutamine synthetase	9533.6	1.40416	1.40416	1.31435e-08	2.37704e-07
PP_4064	ivd	isovaleryl-CoA dehydrogenase	215.837	1.40401	1.40401	0.000791935	0.00372688
PP_2697		putative oxidoreductase containing a flavin	15.2352	1.40304	1.40304	0.01509	0.0442961
PP_1986	leuD	3-isopropylmalate dehydratase small subunit	521.452	1.40216	1.40216	8.19551e-11	2.52488e-09
PP_5334		conserved membrane protein of unknown function	76.4482	-1.39909	1.39909	0.00119737	0.00534077
PP_0121	thrB	homoserine kinase	554.143	1.39411	1.39411	5.67152e-21	1.00178e-18
PP_1463	rimM	Ribosome maturation factor RimM	4536.37	1.39318	1.39318	9.99673e-09	1.87846e-07
PP_3297		conserved protein of unknown function	51.5874	-1.38914	1.38914	0.000518061	0.00258981
PP_5658		protein of unknown function	144.681	1.38829	1.38829	3.18722e-07	4.03081e-06
PP_3331		conserved membrane protein of unknown function	21.3132	-1.38415	1.38415	0.0126841	0.0384515
PP_1831		putative Membrane protein	18.9566	1.38318	1.38318	0.00887307	0.0283585
PP_4055	glgX	Glycogen debranching enzyme	2449.3	-1.38303	1.38303	5.40125e-06	4.89252e-05
PP_4056	ybhP-II	putative phosphohydrolase of unknown function	208.378	-1.38236	1.38236	8.25655e-07	9.21083e-06
PP_2418		putative cobalamin ABC transporter, periplasmic	96.4264	1.37949	1.37949	5.69651e-06	5.12492e-05
PP_1371	pctA	Methyl-accepting chemotaxis protein PctA	884.869	1.3791	1.3791	1.31999e-10	3.82221e-09
PP_2962		Alcohol dehydrogenase, zinc-containing	92.0166	-1.37792	1.37792	4.78142e-07	5.71936e-06
PP_0655		Fimbrial protein-related protein	32.6366	-1.37644	1.37644	0.00371603	0.0138378
PP_1153		putative lipoprotein	173.856	-1.37307	1.37307	0.000323102	0.00172767
PP_4278	xdhA	xanthine dehydrogenase subunit XdhA	433.733	-1.37235	1.37235	0.000251737	0.00140121
PP_4651	cioA	Ubiquinol oxidase subunit I, cyanide	2164.9	-1.37219	1.37219	8.41994e-05	0.000544113
PP_3429		Response regulator	353.339	-1.3701	1.3701	2.67889e-09	5.89021e-08
PP_3004		conserved protein of unknown function	56.2822	-1.36847	1.36847	0.00158963	0.00678215
PP_1880		Outer membrane autotransporter	85.9656	-1.36795	1.36795	1.21284e-06	1.31968e-05
PP_4685		conserved protein of unknown function	110.458	-1.36785	1.36785	0.0020833	0.00849187
PP_3733		putative ABC transporter lipoprotein	40.9235	-1.36726	1.36726	0.00204068	0.00835669
PP_5194	gcvT-II	aminomethyltransferase	511.956	1.36671	1.36671	7.88074e-13	3.48e-11
PP_3259		Acyl-CoA dehydrogenase-related protein	35.378	-1.36663	1.36663	0.0141999	0.0421307
PP_3521		conserved membrane protein of unknown function	51.1843	-1.36492	1.36492	0.000177035	0.00103659
PP_5378		putative metal-binding protein	684.368	1.36425	1.36425	2.21919e-06	2.26144e-05
PP_4020		putative Oxidoreductase	30.3529	1.36206	1.36206	0.00336277	0.012719
PP_4327	ccmA	Cytochrome c biogenesis ATP-binding export	90.6006	1.3612	1.3612	2.36098e-05	0.000178038
PP_4725	dapB	4-hydroxy-tetrahydrodipicolinate reductase	979.608	1.3605	1.3605	6.54159e-18	7.37529e-16
PP_2943		putative Cytochrome c551 peroxidase	477.589	-1.36023	1.36023	1.75677e-10	4.89954e-09
PP_5024		Amino acid ABC transporter, periplasmic amino	1986.32	1.36022	1.36022	2.615e-11	9.23794e-10
PP_0180		putative cytochrome c family protein	439.406	-1.36004	1.36004	4.76301e-06	4.3818e-05
PP_0440	tufA	Elongation factor Tu-A	25812.3	1.3588	1.3588	2.36061e-10	6.31762e-09
PP_3414		Methyl-accepting chemotaxis transducer	572.151	-1.35867	1.35867	2.77673e-09	6.03029e-08
PP_0870		putative Glycine betaine	86.0957	1.35545	1.35545	5.83574e-05	0.000393931
PP_1638	fpr-I	ferredoxin--NADP(+) reductase	3512.39	1.35324	1.35324	2.24702e-20	3.50205e-18
PP_4326	ccmB	protoheme IX ABC transporter - permease subunit	41.6806	1.35135	1.35135	0.000293096	0.00160985
PP_4309		Transporter, NCS1 nucleoside transporter family	51.2026	-1.35104	1.35104	6.6542e-05	0.000442422
PP_3318		conserved protein of unknown function	153.978	-1.35035	1.35035	4.16228e-06	3.88994e-05
PP_1955		Cytochrome P450 family protein	32.2118	1.34896	1.34896	0.00477175	0.0169346
PP_1356		conserved protein of unknown function	88.3561	-1.34895	1.34895	0.000453531	0.00231083
PP_3734		putative ABC transporter, permease protein	71.7422	-1.34852	1.34852	9.56428e-05	0.000613573
PP_3081		conserved protein of unknown function	59.8698	-1.34819	1.34819	0.0011857	0.00529321
PP_3531		conserved exported protein of unknown function	72.8208	-1.3451	1.3451	0.000229721	0.00129775
PP_2200		conserved protein of unknown function	113.239	-1.34401	1.34401	2.93038e-05	0.000213592
PP_2511		conserved protein of unknown function	267.718	-1.34238	1.34238	2.78616e-07	3.57479e-06
PP_0270		Sensor histidine kinase	39.8401	-1.3416	1.3416	0.0167614	0.0484288
PP_1199		toxin-antitoxin system, higB toxin like	269.845	-1.34119	1.34119	3.42471e-08	5.58385e-07
PP_5379	copB-II	copper resistance protein B	894.831	1.34053	1.34053	2.28607e-11	8.24074e-10
PP_0544		Ethanolamine transporter	107.879	1.33987	1.33987	9.68389e-05	0.000620495
PP_5045	thiI	tRNA sulfurtransferase	674.702	1.33945	1.33945	0.00012663	0.000779339
PP_4679	ilvH	acetohydroxybutanoate synthase	788.248	1.33896	1.33896	3.70821e-06	3.52779e-05
PP_3091		conserved membrane protein of unknown function	434.816	1.33692	1.33692	2.5957e-12	1.04202e-10
PP_2911	gabP-III	gamma-aminobutyrate permease	22.7201	-1.33663	1.33663	0.008199	0.026589
PP_2741		conserved membrane protein of unknown function	239.038	-1.33491	1.33491	2.05212e-06	2.11149e-05
PP_5340	aphA	Acetylpolyamine aminohydrolase	74.9017	1.33441	1.33441	1.99785e-06	2.05966e-05
PP_3254		putative Nucleosidase	146.824	1.33437	1.33437	1.02314e-07	1.53154e-06
PP_2237		conserved protein of unknown function	37.7977	-1.33379	1.33379	0.001329	0.00585888
PP_2103		conserved protein of unknown function	77.3982	-1.33332	1.33332	0.00203272	0.00833697
PP_1577		Phage tail tape meausure protein, lambda family	597.139	-1.33217	1.33217	1.0201e-05	8.49925e-05
PP_0245	yhgF	putative transcriptional accessory protein	1195.17	1.33195	1.33195	2.11264e-08	3.63471e-07
PP_3314		Heat shock protein, HSP20 family	61.2088	-1.33125	1.33125	0.000212706	0.00121066
PP_0947		conserved membrane protein of unknown function	108.618	-1.33108	1.33108	0.00121347	0.0054035
PP_4726	dnaJ	Chaperone protein DnaJ	1367.11	1.33102	1.33102	1.57677e-19	2.38723e-17
PP_0807	norR	DNA-binding transcriptional dual regulator (NO)	272.268	1.33055	1.33055	9.46097e-08	1.42831e-06
PP_0455	rplD	50S ribosomal protein L4	7755.72	1.33006	1.33006	6.28433e-09	1.24636e-07
PP_0596		Omega-amino acid--pyruvate aminotransferase	1090.62	1.32694	1.32694	7.91164e-06	6.81687e-05
PP_4817		MaoC domain protein	293.716	-1.32487	1.32487	6.05644e-06	5.39701e-05
PP_5081		Type IV pili biogenesis protein	125.434	-1.32353	1.32353	8.66081e-10	2.11491e-08
PP_4054		conserved protein of unknown function	268.502	-1.32271	1.32271	7.07067e-05	0.000466594
PP_4885		conserved protein of unknown function	712.928	-1.32181	1.32181	4.54336e-09	9.18903e-08
PP_0506		putative ABC efflux transporter, permease	73.3451	1.31854	1.31854	1.44361e-05	0.00011538
PP_4018		Acetyltransferase, GNAT family	69.8204	1.31764	1.31764	0.000309571	0.0016756
PP_1718		putative diguanylate phosphodiesterase	49.9493	-1.31629	1.31629	7.10923e-05	0.000468555
PP_5439		conserved protein of unknown function	74.9173	1.31598	1.31598	7.02608e-07	7.95539e-06
PP_5152		conserved exported protein of unknown function	150.01	1.31544	1.31544	4.02721e-07	4.95132e-06
PP_5307	exbD	TonB-gated outer membrane transporter - gating	381.238	-1.31517	1.31517	6.95474e-06	6.07136e-05
PP_0719	ychF	ribosome-associated potassium-dependent	1438.14	1.31226	1.31226	6.84974e-15	4.59453e-13
PP_1934		conserved protein of unknown function	236.98	-1.30932	1.30932	4.12267e-08	6.60001e-07
PP_2743		Acetyltransferase, GNAT family	43.6284	-1.309	1.309	0.000708987	0.00338157
PP_5000	hslV	peptidase component of the ATP-dependent HslVU	540.093	1.30819	1.30819	5.43709e-09	1.09019e-07
PP_2737		Oxidoreductase, short-chain	150.709	-1.30798	1.30798	3.10013e-06	3.03092e-05
PP_3448	nfrB	bacteriophage N4 receptor, inner membrane	511.06	-1.30705	1.30705	6.62447e-09	1.29055e-07
PP_3784		conserved protein of unknown function	8489.21	1.30533	1.30533	5.09167e-07	6.02249e-06
PP_0886		conserved exported protein of unknown function	566.856	1.30519	1.30519	1.52179e-07	2.13991e-06
PP_0528	ispA	farnesyl diphosphate synthase	328.324	1.30395	1.30395	2.07338e-08	3.57877e-07
PP_2193		Outer membrane ferric siderophore receptor	94.7049	-1.30099	1.30099	0.000200873	0.00115573
PP_1957		Oxidoreductase, Pdr	38.4472	1.29792	1.29792	0.000783228	0.00369904
PP_0994		putative RNA polymerase sigma factor	107.045	-1.29785	1.29785	1.11563e-05	9.17968e-05
PP_0721	rplY	50S ribosomal protein L25	6386.64	1.29619	1.29619	1.79612e-09	4.08483e-08
PP_3020		putative Serine	181.953	-1.2957	1.2957	1.52096e-05	0.000120374
PP_4060	glgE	Alpha-1,4-glucan:maltose-1-phosphate	1400.36	-1.29559	1.29559	2.98377e-06	2.93885e-05
PP_0750		conserved protein of unknown function	1434.6	1.29277	1.29277	1.65735e-05	0.000130108
PP_1576		putative Immunity protein	239.966	-1.29109	1.29109	1.88626e-05	0.000145704
PP_0325	soxA	sarcosine oxidase subunit alpha	657.117	-1.29027	1.29027	1.05074e-06	1.15756e-05
PP_3131		conserved membrane protein of unknown function	402.618	-1.28912	1.28912	2.12649e-07	2.81004e-06
PP_2829		Transcriptional regulator, GntR family	38.0184	-1.28845	1.28845	0.00339374	0.0128178
PP_2234		Transcriptional regulator, AraC family	236.776	-1.28475	1.28475	1.55733e-09	3.57241e-08
PP_3076		putative ABC transporter permease protein	63.652	-1.28242	1.28242	1.49749e-05	0.000118969
PP_0671	glyA-II	serine hydroxymethyltransferase	6012.93	1.28176	1.28176	1.73622e-10	4.86785e-09
PP_4650	cioB	Ubiquinol oxidase subunit II, cyanide	1407.48	-1.27816	1.27816	0.000143302	0.000867836
PP_5715		protein of unknown function	44.1408	-1.27704	1.27704	0.00424786	0.0154174
PP_3099	puuD	uricase	578.696	1.27633	1.27633	2.61354e-06	2.60813e-05
PP_0720	pth	Peptidyl-tRNA hydrolase	246.35	1.27625	1.27625	1.29963e-08	2.36394e-07
PP_0804		Protein secretion ABC efflux system, permease	1763.31	-1.27264	1.27264	8.38406e-06	7.20736e-05
PP_3518		conserved exported protein of unknown function	182.069	-1.27125	1.27125	2.47036e-05	0.000185155
PP_1579		conserved protein of unknown function	533.417	-1.27058	1.27058	0.000258219	0.00143428
PP_0202		CBS domain-containing protein	509.298	-1.27001	1.27001	4.46847e-07	5.38146e-06
PP_0552	bdhA	2,3-butanediol dehydrogenase	56.2786	-1.26858	1.26858	0.00171887	0.00724605
PP_2104		conserved membrane protein of unknown function	102.457	-1.26719	1.26719	7.27468e-05	0.000477086
PP_0395	ycgB	putative type IV piliation protein	5403.64	-1.26647	1.26647	1.21779e-05	9.89735e-05
PP_2512	folEA-II	GTP cyclohydrolase 1	413.197	-1.26632	1.26632	1.79342e-07	2.43675e-06
PP_1029		conserved membrane protein of unknown function	22.2888	-1.26581	1.26581	0.00867992	0.0278588
PP_3138		VirK domain protein	507.684	-1.26533	1.26533	1.37669e-07	1.96806e-06
PP_5614		protein of unknown function	29.1337	-1.26355	1.26355	0.0031347	0.0120444
PP_2383		Transcriptional regulator, AraC family	43.7683	-1.26354	1.26354	0.00204468	0.00836662
PP_0682		conserved inner membrane protein of unknown	178.544	1.26315	1.26315	3.13527e-09	6.6722e-08
PP_1407		Sulfate transporter	352.179	1.26007	1.26007	2.76487e-07	3.55609e-06
PP_5414	atpG	ATP synthase gamma chain	9390.27	1.25828	1.25828	7.35618e-11	2.27956e-09
PP_4680	ilvI	acetohydroxybutanoate synthase	7736.21	1.25727	1.25727	5.65079e-05	0.000384411
PP_2944		Sensor histidine kinase	1036.74	-1.25715	1.25715	1.7272e-07	2.35888e-06
PP_4050	glgA	glycogen synthase	3416.6	-1.25691	1.25691	3.51245e-06	3.36573e-05
PP_4033	rnz	Ribonuclease Z	51.494	1.25663	1.25663	0.000447268	0.00228331
PP_3808		Antibiotic synthesis protein MbtH	61.2103	-1.25551	1.25551	0.00572599	0.0197411
PP_3802		putative Cation ABC transporter, ATP-binding	137.595	-1.25504	1.25504	0.00013344	0.000814629
PP_4877	rpsF	30S ribosomal protein S6	2004.74	1.2543	1.2543	8.56038e-13	3.74888e-11
PP_1578		conserved protein of unknown function	56.5674	-1.2511	1.2511	0.0149248	0.043906
PP_4161	kdpA	potassium-transporting ATPase A chain	17.5002	-1.251	1.251	0.0162796	0.0472947
PP_0417	trpE	Anthranilate synthase component 1	2236.61	1.2492	1.2492	3.23512e-17	3.29671e-15
PP_3593		Amino acid ABC transporter, periplasmic binding	75.3978	1.24898	1.24898	5.88556e-05	0.000396285
PP_0688	rplU	50S ribosomal protein L21	3687.94	1.24848	1.24848	8.4435e-06	7.22813e-05
PP_0067	fmt	Methionyl-tRNA formyltransferase	173.343	1.24831	1.24831	1.28062e-06	1.37647e-05
PP_3810		conserved protein of unknown function	37.1071	-1.24827	1.24827	0.00485794	0.0171501
PP_4889	purA	Adenylosuccinate synthetase	3695.75	1.24725	1.24725	4.04879e-13	1.93284e-11
PP_4322	ccmF	holocytochrome c synthetase	1829.92	1.24586	1.24586	2.50879e-13	1.23093e-11
PP_0723	ispE	4-diphosphocytidyl-2-C-methyl-D-erythritol	1804.9	1.24584	1.24584	0.00145421	0.0063008
PP_0865		ECF subfamily RNA polymerase sigma-24 factor	26.0145	-1.24497	1.24497	0.00683458	0.0227062
PP_4570		conserved protein of unknown function	1900.67	1.24372	1.24372	2.01701e-19	2.96745e-17
PP_0461	rplP	50S ribosomal protein L16	2950.36	1.24324	1.24324	5.17063e-10	1.31727e-08
PP_0504	oprG	Outer membrane protein OprG	25594.2	1.24215	1.24215	0.000127965	0.000786641
PP_2420		Outer membrane ferric siderophore receptor	14.6722	1.23591	1.23591	0.00629451	0.0213401
PP_2538		conserved exported protein of unknown function	157.958	-1.23494	1.23494	3.02121e-06	2.9702e-05
PP_2064		Multidrug efflux RND membrane fusion protein	31.3537	-1.23448	1.23448	0.0169055	0.0487919
PP_3128		putative Exopolysaccharide	1387.03	-1.23446	1.23446	1.83965e-07	2.48682e-06
PP_5413	atpD	ATP synthase subunit beta	26985.1	1.23393	1.23393	6.50614e-09	1.27264e-07
PP_2051	fadA	3-ketoacyl-CoA thiolase (thiolase I)	56.8981	-1.23067	1.23067	0.00103719	0.00470958
PP_3430		Sensory box histidine kinase	1042.71	-1.22985	1.22985	1.60408e-14	1.0119e-12
PP_5236		conserved protein of unknown function	1021.07	-1.22941	1.22941	9.18363e-11	2.7808e-09
PP_0444	rplA	50S ribosomal protein L1	10237.8	1.2291	1.2291	1.0385e-09	2.4567e-08
PP_1462	rpsP	30S ribosomal protein S16	1239	1.22811	1.22811	2.32664e-07	3.04416e-06
PP_4102		conserved protein of unknown function	127.733	-1.22599	1.22599	2.36197e-05	0.000178038
PP_3647		putative Oxidoreductase	35.468	-1.2232	1.2232	0.0095251	0.0301155
PP_3668	katG	Catalase-peroxidase	6558.04	-1.22292	1.22292	0.000541906	0.00269125
PP_3556		conserved membrane protein of unknown function	48.2683	1.22146	1.22146	0.000358269	0.0018741
PP_0686	yjdM	conserved protein of unknown function	140.491	1.22144	1.22144	0.000107603	0.000677233
PP_1987		Methlytransferase, UbiE	207.718	1.22053	1.22053	0.000293159	0.00160985
PP_2964		putative transposase	1480.14	-1.21966	1.21966	9.60609e-06	8.11376e-05
PP_3785		conserved protein of unknown function	8316.27	1.21942	1.21942	6.22363e-06	5.53339e-05
PP_1983		PAS	1507.33	-1.21938	1.21938	3.27218e-08	5.35163e-07
PP_0620		GntR family transcriptional regulator	135.544	-1.21879	1.21879	0.000604495	0.00294684
PP_0323	soxB	sarcosine oxidase subunit beta	152.604	-1.2185	1.2185	0.000169184	0.000993422
PP_3541		Transporter, MgtC family	60.1645	-1.21681	1.21681	0.00139708	0.00609811
PP_0271	gltR-I	DNA-binding response regulator	66.535	-1.21632	1.21632	0.00428746	0.0155399
PP_0812	cyoA	cytochrome bo terminal oxidase subunit II	5984.1	1.21573	1.21573	6.00711e-08	9.38988e-07
PP_1992	asd	aspartate-semialdehyde dehydrogenase	130.603	1.21448	1.21448	4.38939e-08	7.00583e-07
PP_4727	dnaK	Chaperone protein DnaK	17436.4	1.21405	1.21405	1.70578e-07	2.34169e-06
PP_3141		Glycosyl transferase, WecB	200.786	-1.21396	1.21396	2.8606e-05	0.000209767
PP_3774		conserved protein of unknown function	58.2711	1.21388	1.21388	0.00229622	0.00921094
PP_0495	ansA	type 1 L-asparaginase	65.3191	1.21376	1.21376	0.000139594	0.000848292
PP_2105		conserved protein of unknown function	133.47	-1.21166	1.21166	0.00364607	0.0135964
PP_5734		conserved hypothetical protein	466.602	-1.21155	1.21155	2.06255e-07	2.73922e-06
PP_2574		Transcriptional regulator, LysR family	183.491	-1.20986	1.20986	5.29575e-06	4.80517e-05
PP_0466	rplE	50S ribosomal protein L5	9882.94	1.2086	1.2086	2.82663e-08	4.71016e-07
PP_0530	ribB	3,4-dihydroxy-2-butanone 4-phosphate synthase	44.3796	1.2066	1.2066	0.00477454	0.0169346
PP_0713	kefB-I	Kef-type potassium	157.854	-1.206	1.206	9.70809e-06	8.16767e-05
PP_4066	liuC	methylglutaconyl-CoA hydratase	55.8605	1.20582	1.20582	0.00210182	0.00852967
PP_0597	mmsA-I	methylmalonate-semialdehyde dehydrogenase	1152.34	1.20432	1.20432	6.24966e-05	0.000419202
PP_4669		OmpA family protein	205.02	1.20336	1.20336	1.60801e-07	2.23059e-06
PP_0813	cyoB	cytochrome bo terminal oxidase subunit I	17001.5	1.20329	1.20329	3.08873e-06	3.02536e-05
PP_0199	qmcA	putative membrane protease family, stomatin	50.8099	-1.20317	1.20317	0.00167213	0.00707717
PP_1860	ohrR	Organic hydroperoxide resistance transcriptional	126.556	-1.20281	1.20281	4.28135e-06	3.98715e-05
PP_2660		conserved protein of unknown function	195.191	-1.20223	1.20223	1.81997e-07	2.4665e-06
PP_4707		OsmY-related protein	71.44	1.19817	1.19817	0.00322846	0.0123076
PP_4890	hisZ	ATP phosphoribosyltransferase regulatory	898.997	1.19712	1.19712	1.07824e-12	4.60774e-11
PP_0464	rplN	50S ribosomal protein L14	1112.41	1.19671	1.19671	2.33367e-07	3.04584e-06
PP_0545	aldB-I	aldehyde dehydrogenase	19043.9	1.19661	1.19661	0.000108023	0.000678216
PP_0126	cc	Cytochrome c4	3207.4	1.19657	1.19657	0.000150927	0.000902666
PP_3797		conserved membrane protein of unknown function	342.387	-1.19592	1.19592	7.34119e-05	0.000480259
PP_4608		RNA polymerase sigma-70 factor, ECF subfamily	22.3312	-1.19512	1.19512	0.0134396	0.0402683
PP_0457	rplB	50S ribosomal protein L2	9514.7	1.19329	1.19329	3.24095e-09	6.84327e-08
PP_4021	cpo	non-heme chloroperoxidase	932.584	-1.1932	1.1932	0.000600693	0.00293371
PP_3312		putative Heat shock protein	43.701	-1.19268	1.19268	0.0155691	0.0454298
PP_0907		RND efflux membrane fusion protein-related	218.929	-1.19236	1.19236	1.51489e-06	1.59908e-05
PP_3485		conserved exported protein of unknown function	48.5027	-1.19213	1.19213	0.0163806	0.0475359
PP_1683		Transcriptional regulator, MarR family	129.91	-1.18941	1.18941	0.00571755	0.0197248
PP_2191		putative Lipoprotein	65.3538	-1.18892	1.18892	0.000577437	0.00284162
PP_3580		conserved protein of unknown function	146.214	-1.18829	1.18829	0.00499744	0.0175723
PP_0183		glutathione S-transferase	294.552	1.18747	1.18747	1.84537e-06	1.91362e-05
PP_2636	bcsB	cellulose synthase and translocator subunit	59.3844	1.18574	1.18574	0.00018801	0.0010912
PP_4605		Transcriptional regulator, AraC family	205.613	-1.18559	1.18559	2.92844e-06	2.89511e-05
PP_0716		HlyD family secretion protein	72.3492	-1.18553	1.18553	0.00916587	0.0291536
PP_4612		putative FecR protein	51.9788	-1.1846	1.1846	0.00170787	0.00721117
PP_2575		conserved exported protein of unknown function	99.9861	-1.1834	1.1834	0.000494861	0.00248617
PP_0779		Methyl-accepting chemotaxis transducer	490.175	1.18219	1.18219	1.60609e-08	2.8369e-07
PP_3630	opdT-II	tyrosine-specific outer membrane porin D	104.712	-1.18155	1.18155	2.63054e-07	3.41977e-06
PP_4647		transcriptional regulator, LuxR family	232.699	-1.17998	1.17998	3.04223e-06	2.98532e-05
PP_5371		Rubredoxin	39.9661	-1.17967	1.17967	0.00177699	0.00745547
PP_1011	glk	glucokinase	1455.53	-1.17922	1.17922	3.67972e-08	5.94477e-07
PP_2566		conserved protein of unknown function containing	81.1027	-1.17912	1.17912	2.33005e-05	0.000176133
PP_1517		RND efflux transporter	203.792	1.17835	1.17835	1.0712e-07	1.59895e-06
PP_1980		conserved protein of unknown function	97.7001	-1.17754	1.17754	0.00193434	0.00797669
PP_5661		putative lipoprotein	516.808	1.17703	1.17703	0.00684446	0.0227248
PP_0460	rpsC	30S ribosomal subunit protein S3	10582.3	1.17625	1.17625	1.20748e-08	2.22942e-07
PP_5676		conserved protein of unknown function	84.3632	-1.17619	1.17619	0.0004955	0.00248642
PP_2996		conserved protein of unknown function	47.5296	-1.17585	1.17585	0.00304804	0.0117809
PP_2284		Tail tubular protein B	26.0133	-1.17378	1.17378	0.0100791	0.031547
PP_5423		conserved membrane protein of unknown function	74.6716	1.17374	1.17374	0.000196191	0.00113371
PP_4254		conserved protein of unknown function	79.5526	-1.17373	1.17373	0.00257687	0.0101674
PP_0006	oxaA	probable membrane protein insertase	2790.95	1.17361	1.17361	1.13261e-07	1.67645e-06
PP_3433	hpd	4-hydroxyphenylpyruvate dioxygenase	393.066	1.17213	1.17213	0.000119526	0.000739053
PP_4784	hemL	Glutamate-1-semialdehyde 2,1-aminomutase	1231.3	1.17176	1.17176	6.21861e-13	2.81645e-11
PP_4967	metK	methionine adenosyltransferase	5387.43	1.17162	1.17162	2.39243e-09	5.28229e-08
PP_0508		conserved exported protein of unknown function	127.161	1.17141	1.17141	8.86721e-06	7.5664e-05
PP_3130		conserved exported protein of unknown function	737.47	-1.17129	1.17129	7.17884e-06	6.24642e-05
PP_0714		Transporter, PerM family	170.019	-1.17029	1.17029	0.000548142	0.00271712
PP_3720		putative NAD(P)H quinone oxidoreductase	630.014	1.16946	1.16946	1.0996e-05	9.07105e-05
PP_5192	gcvP-II	glycine dehydrogenase	2141.79	-1.16904	1.16904	4.62848e-06	4.27926e-05
PP_5219		conserved membrane protein of unknown function	41.1524	-1.16851	1.16851	0.00918398	0.0291762
PP_0612	thiO	FAD-dependent glycine	859.786	1.16658	1.16658	2.82519e-09	6.08564e-08
PP_4405		Sensory box protein	324.907	-1.16525	1.16525	8.76401e-10	2.12886e-08
PP_4687	hmuV	Hemin import ATP-binding protein HmuV	67.908	-1.16507	1.16507	0.000773471	0.00366276
PP_4432		putative Xaa-Pro aminopeptidase	368.457	1.16502	1.16502	3.56254e-10	9.24395e-09
PP_2599		Chemotaxis sensory transducer family protein	41.7036	-1.1649	1.1649	0.00391747	0.0144761
PP_2205	copA-I	copper resistance protein A	93.4641	1.16446	1.16446	0.000548936	0.00271851
PP_5743		putative TonB-dependent receptor protein	27.3734	1.1634	1.1634	0.00982381	0.0308756
PP_1119		conserved protein of unknown function	103.905	-1.1634	1.1634	0.000563974	0.00278722
PP_5318	ubiA	4-hydroxybenzoate octaprenyltransferase	143.817	1.16248	1.16248	2.60454e-05	0.000193841
PP_5415	atpA	ATP synthase subunit alpha	27443.9	1.16115	1.16115	4.40905e-09	8.98889e-08
PP_1196		conserved exported protein of unknown function	247.91	-1.16077	1.16077	6.54866e-06	5.76434e-05
PP_3405		conserved membrane protein of unknown function	148.311	-1.16059	1.16059	9.79194e-05	0.000626661
PP_0675	gdhA	glutamate dehydrogenase, NADP-dependent	1546.88	1.1596	1.1596	1.70718e-10	4.81707e-09
PP_5748	ccmH	cytochrome c heme lyase subunit	180.1	1.15955	1.15955	1.38057e-05	0.00011118
PP_2734	cfa	Cyclopropane-fatty-acyl-phospholipid synthase	664.64	-1.15805	1.15805	0.00136331	0.00598526
PP_0458	rpsS	30S ribosomal protein S19	1296.2	1.15758	1.15758	1.23074e-07	1.78676e-06
PP_1530	dapD	2,3,4,5-tetrahydropyridine-2,6-dicarboxylate	929.677	1.15742	1.15742	5.7895e-18	6.81746e-16
PP_2984		conserved protein of unknown function	140.794	-1.15588	1.15588	0.000687896	0.00328986
PP_2563		putative Antibiotic biosynthesis protein	828.872	-1.15309	1.15309	6.06739e-07	7.0046e-06
PP_4657	ypfJ	zinc metalloprotease	894.087	-1.15245	1.15245	2.19991e-07	2.88547e-06
PP_2410	czcA-II	cation efflux system protein	74.7276	-1.15228	1.15228	5.8843e-05	0.000396285
PP_5004	phaB	Poly(3-hydroxyalkanoate) depolymerase	416.099	-1.15194	1.15194	2.16242e-08	3.7083e-07
PP_5026	opgG	Glucans biosynthesis protein G	1956.16	1.15079	1.15079	6.15607e-11	1.94173e-09
PP_1593	pyrH	Uridylate kinase	1084.23	1.15069	1.15069	4.11982e-11	1.35596e-09
PP_2460	Nuh	ribonucleoside hydrolase	196.945	1.15056	1.15056	0.00107684	0.00486044
PP_3832		carbon storage regulator (csrA-like)	170.865	-1.14996	1.14996	0.0110302	0.034081
PP_3567		Transcriptional regulator, LysR family	238.665	-1.14988	1.14988	0.000101361	0.000647124
PP_2313		conserved membrane protein of unknown function	41.1602	-1.14887	1.14887	0.0019678	0.00809579
PP_0550		conserved protein of unknown function	589.274	-1.14868	1.14868	0.0016009	0.00681601
PP_0197		conserved protein of unknown function	34.8182	1.14835	1.14835	0.0132698	0.0398846
PP_3238		putative Transcriptional regulator PyrR	98.8017	-1.14777	1.14777	0.000220185	0.00124921
PP_0462	rpmC	50S ribosomal subunit protein L29	110.504	1.1451	1.1451	0.00183488	0.00764992
PP_1879		conserved protein of unknown function	160.374	-1.14361	1.14361	0.000611484	0.00297544
PP_2635	bcsA	cellulose synthase and translocator subunit	54.5167	1.14308	1.14308	8.28422e-05	0.000535996
PP_4922	thiC	Phosphomethylpyrimidine synthase	2224.73	1.14212	1.14212	7.18318e-05	0.000471669
PP_3786	aspC	aminotransferase	4170.94	1.14206	1.14206	2.86284e-05	0.000209767
PP_5417	atpF	ATP synthase subunit b	4936.84	1.14204	1.14204	6.72067e-11	2.10727e-09
PP_0712	ppkB	polyphosphate kinase 2	869.867	-1.14123	1.14123	8.56769e-08	1.30086e-06
PP_0717		conserved membrane protein of unknown function,	52.1841	-1.1391	1.1391	0.00253151	0.0100258
PP_1838		conserved membrane protein of unknown function	927.69	1.13832	1.13832	1.62977e-10	4.6431e-09
PP_2956		Ribosomal protein S6 modification	162.761	-1.13773	1.13773	2.86311e-05	0.000209767
PP_4520		conserved protein of unknown function	66.883	-1.13725	1.13725	0.00432101	0.0155873
PP_4689		Heme	203.326	-1.13271	1.13271	7.44775e-07	8.39695e-06
PP_0244		conserved protein of unknown function	27.4545	1.13105	1.13105	0.0107458	0.0333972
PP_1361	groL	60 kDa chaperonin	34401.3	1.13014	1.13014	1.41537e-06	1.50906e-05
PP_0715		Outer membrane efflux protein	111.678	-1.12889	1.12889	0.00454484	0.0162317
PP_1403	bglX	periplasmic beta-D-glucoside glucohydrolase	680.884	1.12783	1.12783	1.3779e-07	1.96806e-06
PP_3932		Diguanylate cyclase	179.511	-1.12667	1.12667	1.81985e-08	3.18575e-07
PP_1231	nadA	quinolinate synthase [4Fe-4S] cluster subunit	428.602	1.12657	1.12657	1.45674e-07	2.06951e-06
PP_1876		putative ATP	295.114	1.12622	1.12622	2.30813e-08	3.92012e-07
PP_3787		conserved protein of unknown function	1722.06	1.12569	1.12569	8.16782e-05	0.000529759
PP_3071	aacs	acetoacetyl-coenzyme A synthetase	930.602	-1.12455	1.12455	7.07879e-06	6.16949e-05
PP_0459	rplV	50S ribosomal protein L22	946.941	1.12429	1.12429	5.49696e-07	6.41382e-06
PP_0533	pfeS-I	histidine kinase	63.0161	-1.12319	1.12319	0.00240347	0.00958314
PP_1061		putative ATP-dependent DNA helicase lhr	327.111	-1.12289	1.12289	8.6759e-11	2.65743e-09
PP_1413	ung	Uracil-DNA glycosylase	209.359	1.12248	1.12248	2.82658e-06	2.81014e-05
PP_4888		putative methyl-accepting chemotaxis transducer	96.3818	1.12207	1.12207	0.0093333	0.029562
PP_3136		putative O-acetyltransferase	196.875	-1.12103	1.12103	0.000118243	0.000731974
PP_1394		putative Acetolactate synthase, large subunit	59.898	-1.1208	1.1208	0.000879392	0.00409841
PP_5083		putative Type IV pili biogenesis protein PilM	137.661	-1.12076	1.12076	1.47503e-06	1.56324e-05
PP_1644		NAD(P)H dehydrogenase (quinone)	342.949	1.11961	1.11961	1.28004e-07	1.83819e-06
PP_1511		conserved protein of unknown function	40.5367	-1.11859	1.11859	0.00370231	0.0137964
PP_2052		putative bifunctional enzyme:	716.142	-1.1183	1.1183	2.062e-07	2.73922e-06
PP_4041		putative glycoside hydrolase	682.634	-1.11757	1.11757	2.57443e-05	0.000191869
PP_0443	rplK	50S ribosomal protein L11	2347.69	1.11671	1.11671	1.14987e-08	2.13048e-07
PP_1645	yfgD	putative enzyme	237.304	1.11643	1.11643	1.94475e-05	0.000149785
PP_0751	mqo-I	malate:quinone oxidoreductase	4898.75	1.11445	1.11445	1.24453e-10	3.64353e-09
PP_0805		Outer membrane efflux protein	880.494	-1.1144	1.1144	2.18736e-05	0.000167015
PP_0196	yheS	putative of ABC superfamily informational	802.795	1.11428	1.11428	3.32226e-10	8.75853e-09
PP_4059	treSB	fused trehalose synthase B	1060.86	-1.11374	1.11374	0.00035895	0.00187476
PP_5037		lipocalin family lipoprotein	119.292	1.11315	1.11315	0.000392881	0.0020311
PP_3721	aruH	Arginine--pyruvate transaminase AruH	863.243	1.1129	1.1129	1.73499e-05	0.000135164
PP_0307		conserved exported protein of unknown function	79.1612	1.11168	1.11168	0.000264958	0.00146863
PP_3135		putative Glycosyl transferase	1108.99	-1.11158	1.11158	7.57848e-06	6.56183e-05
PP_0357		ACT domain protein	170.938	-1.10952	1.10952	0.000329909	0.00175874
PP_0465	rplX	50S ribosomal protein L24	1524.68	1.10904	1.10904	2.8624e-06	2.84042e-05
PP_4782	thiD	Phosphomethylpyrimidine kinase	416.699	1.10872	1.10872	6.33711e-09	1.24834e-07
PP_1317	petA	Ubiquinol-cytochrome c reductase iron-sulfur	4691.67	1.10862	1.10862	5.20609e-13	2.44134e-11
PP_3704		conserved protein of unknown function	276.779	-1.10808	1.10808	0.00746095	0.0244954
PP_4358	fliM	flagellar synthesis, switching and energizing	399.616	1.10791	1.10791	5.47571e-09	1.09082e-07
PP_4636	yqeF	acetyl-CoA acetyltransferase	62.7914	1.10742	1.10742	0.00110663	0.00496952
PP_5044	typA	ribosome associated GTPase	4974.09	1.1071	1.1071	7.53897e-07	8.48174e-06
PP_0849	ndk	Nucleoside diphosphate kinase	5277.43	1.10695	1.10695	2.138e-05	0.000163718
PP_4963	pgk	Phosphoglycerate kinase	2006.51	1.1066	1.1066	7.23473e-17	6.97033e-15
PP_0814	cyoC	cytochrome bo terminal oxidase subunit III	1485.8	1.10633	1.10633	4.90407e-06	4.50375e-05
PP_5155	serA	D-3-phosphoglycerate dehydrogenase	4823.95	1.10595	1.10595	1.82175e-10	5.05417e-09
PP_2736		conserved protein of unknown function	526.771	-1.10539	1.10539	1.63956e-05	0.000129094
PP_1010	edd	phosphogluconate dehydratase	3299.84	-1.10512	1.10512	3.7929e-06	3.58903e-05
PP_0431		conserved membrane protein of unknown function	99.5713	1.10435	1.10435	0.000317739	0.0017092
PP_5128	ilvD	Dihydroxy-acid dehydratase	3718.17	1.10417	1.10417	2.92703e-07	3.72845e-06
PP_4151		Excisionase domain protein	389.486	-1.10272	1.10272	1.74165e-07	2.37249e-06
PP_5122		Oxidoreductase, GMC family	37.7942	1.1024	1.1024	0.00179687	0.00752696
PP_0507		putative ABC efflux transporter, ATP-binding	74.2235	1.10216	1.10216	0.000706421	0.00337541
PP_1193		conserved membrane protein of unknown function	41.7022	-1.10143	1.10143	0.00503015	0.0176521
PP_0746	upp	Uracil phosphoribosyltransferase	513.104	1.10127	1.10127	4.34327e-09	8.95524e-08
PP_2180	spuC-I	polyamine:pyruvate transaminase	99.28	1.10052	1.10052	0.000144341	0.000873133
PP_4590	ycgL	conserved protein of unknown function	33.591	1.09771	1.09771	0.00611017	0.0208232
PP_4356	fliO	Flagellar protein FliO	45.1007	1.09746	1.09746	0.000659923	0.00317614
PP_0456	rplW	50S ribosomal protein L23	1093.67	1.09742	1.09742	1.75019e-06	1.82564e-05
PP_2379		putative cytochrome oxidase biogenesis protein	329.953	1.09686	1.09686	8.5021e-08	1.29462e-06
PP_5536		conserved protein of unknown function with RHS	225.128	-1.09618	1.09618	6.14908e-07	7.08348e-06
PP_0649		MutT	56.2354	-1.09528	1.09528	0.0029304	0.0113593
PP_3495	trmK	tRNA (adenine(22)-N(1))-methyltransferase	127.566	1.09394	1.09394	3.88803e-05	0.000277291
PP_2579	yijP	putative phosphoethanolamine transferase CptA	49.1113	1.09329	1.09329	0.00219056	0.00884065
PP_4446		putative Group II intron-encoding maturase	110.889	-1.09262	1.09262	1.98349e-05	0.000152547
PP_4112		Sulphate transporter	154.157	1.09253	1.09253	9.7414e-06	8.16767e-05
PP_1702	rdgC	Recombination-associated protein RdgC	788.223	1.09236	1.09236	1.52649e-07	2.13991e-06
PP_4629		Sensory box protein	61.3685	-1.09145	1.09145	0.00380303	0.0140826
PP_5006		Transcriptional regulator, TetR family	196.456	-1.08972	1.08972	9.24389e-06	7.8499e-05
PP_5695		conserved protein of unknown function	44.7045	-1.08901	1.08901	0.00542401	0.0188595
PP_5364	clsA	Cardiolipin synthase 1	281.148	-1.08895	1.08895	2.41433e-08	4.07437e-07
PP_1315	rplM	50S ribosomal protein L13	4563.61	1.08877	1.08877	2.19198e-06	2.24234e-05
PP_0815	cyoD	cytochrome bo terminal oxidase subunit IV	481.253	1.08772	1.08772	0.000671848	0.00322183
PP_3443		putative glyceraldehyde-3-phosphate	1912.03	-1.08772	1.08772	2.16732e-10	5.88956e-09
PP_5092		putative exported NLP	254.292	-1.08652	1.08652	0.000150239	0.000900587
PP_4259		Iron-sulfur cluster-binding protein	2694.15	1.08322	1.08322	3.47972e-08	5.63885e-07
PP_5156		conserved exported protein of unknown function	1387.75	1.08276	1.08276	4.29181e-12	1.62445e-10
PP_4909	serB	phosphoserine phosphatase	1056.35	1.08241	1.08241	5.39762e-11	1.72301e-09
PP_4032		putative Outer membrane lipoprotein Blc	66.9362	1.08233	1.08233	0.000789078	0.00372335
PP_4321	ccmG	holocytochrome c synthetase subunit	400.412	1.08208	1.08208	4.41048e-09	8.98889e-08
PP_3311	kefB-II	glutathione-regulated potassium	109.742	-1.08173	1.08173	3.84809e-06	3.6283e-05
PP_4770		conserved protein of unknown function	265.76	1.08017	1.08017	1.39153e-09	3.21996e-08
PP_2935		conserved membrane protein of unknown function	51.9134	-1.07928	1.07928	0.00681962	0.0226751
PP_1813		ComEA-related protein	263.327	-1.07914	1.07914	0.00136899	0.00600023
PP_2332		conserved exported protein of unknown function	80.38	1.07892	1.07892	0.000868834	0.00405278
PP_0087		conserved exported protein of unknown function	915.055	-1.07872	1.07872	0.00393514	0.0145049
PP_1636	dgkA-I	diacylglycerol kinase	52.8076	1.07863	1.07863	0.00655725	0.0220195
PP_2131	uup	DNA-binding ATPase involved in replication	913.118	1.07832	1.07832	6.19351e-07	7.11918e-06
PP_5416	atpH	ATP synthase subunit delta	3184.54	1.07825	1.07825	1.20675e-10	3.57238e-09
PP_5353		conserved exported protein of unknown function	797.432	1.07807	1.07807	5.43329e-06	4.90477e-05
PP_4946	putP	sodium	434.703	1.07703	1.07703	0.000204941	0.00117404
PP_5005	phaC-II	Poly(3-hydroxyalkanoate) polymerase 2	861.654	-1.07651	1.07651	3.66197e-07	4.54445e-06
PP_2882		putative 2-hydroxychromene-2-carboxylate	103.044	-1.07633	1.07633	0.000179409	0.00104817
PP_1122		OmpA family protein	595.94	-1.07545	1.07545	0.000278284	0.00153928
PP_1816		Alcohol dehydrogenase, zinc-containing	713.594	-1.07375	1.07375	0.000121491	0.000750326
PP_1639		conserved protein of unknown function, SprT	156.141	-1.07281	1.07281	0.00191281	0.00790638
PP_0396		conserved protein of unknown function	4223.11	-1.07145	1.07145	7.74863e-05	0.000503804
PP_2143	lexA-I	transcriptional repressor	251.368	1.07048	1.07048	3.5475e-07	4.43353e-06
PP_3242		GGDEF domain protein	335.615	-1.06886	1.06886	0.000132383	0.000811164
PP_5011	ubiE	Ubiquinone	1636.09	1.06721	1.06721	1.58733e-07	2.20768e-06
PP_1071	gltI	glutamate	6749.86	1.06708	1.06708	0.00776677	0.0253424
PP_1969		putative Molybdenum cofactor biosynthesis	47.0073	-1.06706	1.06706	0.00327809	0.0124879
PP_0727		conserved protein of unknown function	48.4302	-1.06585	1.06585	0.00100094	0.00456453
PP_5418	atpE	ATP synthase subunit c	532.81	1.06579	1.06579	0.00100847	0.00459094
PP_5622		conserved protein of unknown function	130.697	-1.06557	1.06557	3.62119e-06	3.45742e-05
PP_5041	glgP	glycogen phosphorylase	3093.32	-1.06532	1.06532	5.14767e-06	4.67881e-05
PP_0007	yidD	conserved hypothetical protein	62.0595	1.06509	1.06509	0.000790575	0.00372378
PP_5297		putative Amino acid transporter	66.2341	1.06375	1.06375	0.0064073	0.0216394
PP_3280	paaJ	3-oxoadipyl-CoA	44.5213	-1.0636	1.0636	0.00482057	0.0170522
PP_2567		Hydrolase, alpha	54.6449	-1.06115	1.06115	0.0076638	0.0250657
PP_0785	cysZ	putative cysZ protein, required for sulfate	164.583	1.06105	1.06105	1.21671e-08	2.23865e-07
PP_0778		Glycosyl transferase, group 1 family protein	86.0574	-1.06062	1.06062	0.00203965	0.00835669
PP_0913		conserved exported protein of unknown function	3414.2	-1.05909	1.05909	0.000640141	0.00308935
PP_3095	clpV	Protein ClpV1	414.465	1.05876	1.05876	1.84191e-06	1.91362e-05
PP_0538	ppa	inorganic pyrophosphatase	3025.48	1.05597	1.05597	1.13678e-06	1.23946e-05
PP_0445	rplJ	50S ribosomal protein L10	6455.6	1.05569	1.05569	3.23719e-08	5.31079e-07
PP_2582		putative Heme oxygenase	78.3247	-1.05542	1.05542	0.000354546	0.00186198
PP_0471	rpsE	30S ribosomal protein S5	5168.57	1.05474	1.05474	1.71664e-06	1.79418e-05
PP_3142		putative Sugar transferase	515.011	-1.05465	1.05465	1.40598e-05	0.000113055
PP_3075		putative transcriptional regulator	160.015	-1.05402	1.05402	0.000351735	0.00185089
PP_1832		putative Oxidase	123.892	1.053	1.053	8.22796e-05	0.000533007
PP_1972	tyrB	aromatic-amino-acid aminotransferase	2267.45	1.05294	1.05294	1.3383e-12	5.67334e-11
PP_5250	opdB	proline-specific outer membrane porin D	28.1088	-1.05178	1.05178	0.014914	0.0439051
PP_3127		putative Exopolysaccharide transport protein	1096.88	-1.0514	1.0514	3.80013e-05	0.000272392
PP_2304		putative Peptidyl-prolyl cis-trans isomerase D	2581.3	1.05129	1.05129	1.67448e-12	6.98665e-11
PP_1218		putative acyl-CoA thioesterase	185.9	1.05105	1.05105	7.68313e-05	0.000500159
PP_2505		GAF domain	835.59	-1.05087	1.05087	2.23708e-05	0.000169832
PP_5449		conserved exported protein of unknown function	179.421	1.05045	1.05045	1.10071e-05	9.07105e-05
PP_3629		conserved protein of unknown function	272.422	-1.04998	1.04998	0.000328956	0.00175542
PP_4036	pydB	D-hydantoinase	5748.3	-1.04972	1.04972	0.00225289	0.00906116
PP_4293		conserved exported protein of unknown function	44.7023	1.04649	1.04649	0.00104486	0.00473758
PP_1643		conserved membrane protein of unknown function	222.586	1.04607	1.04607	1.2717e-07	1.83617e-06
PP_2738		putative Transcriptional regulator	158.762	-1.04548	1.04548	8.8136e-05	0.000568166
PP_1783	rfbA	dTDP-glucose pyrophosphorylase	1691.31	1.04523	1.04523	8.79826e-10	2.12886e-08
PP_0282	artJ	L-arginine ABC transporter - periplasmic binding	3252.38	1.04518	1.04518	2.87351e-07	3.66909e-06
PP_1581		BNR domain protein	600.425	-1.0444	1.0444	3.82048e-06	3.60868e-05
PP_2713		DNA-binding response regulator	202.997	-1.04402	1.04402	7.77964e-06	6.71406e-05
PP_0573		conserved protein of unknown function	257.463	-1.04311	1.04311	0.000156125	0.000931653
PP_1518		conserved exported protein of unknown function	377.255	1.04311	1.04311	6.48739e-06	5.71992e-05
PP_4683	mrcB	transglycosylase	804.343	1.04271	1.04271	8.11438e-10	1.99991e-08
PP_0288		putative Oxalate	169.69	1.04055	1.04055	4.22265e-05	0.000296762
PP_3139		Glycosyl transferase, group 1 family protein	820.492	-1.03955	1.03955	1.25979e-06	1.36237e-05
PP_5061	betT-I	Choline transporter	40.1775	-1.03854	1.03854	0.00842481	0.0272048
PP_1594	frr	Ribosome-recycling factor	1586.99	1.03783	1.03783	1.40224e-09	3.23063e-08
PP_5030	hutI	Imidazolonepropionase	69.5242	1.03627	1.03627	0.00611061	0.0208232
PP_1587		NhaP-type Na+	440.407	1.03398	1.03398	4.64196e-05	0.000324081
PP_4152		conserved protein of unknown function	156.985	-1.03373	1.03373	3.99029e-05	0.000283439
PP_5007		Polyhydroxyalkanoate granule-associated protein	4481.59	-1.03329	1.03329	6.90717e-06	6.04977e-05
PP_0338	aceF	AceF-S-acetyldihydrolipoate	5064.84	-1.03229	1.03229	8.59814e-09	1.6272e-07
PP_3788		putative Non-ribosomal peptide synthetase	5035.7	1.03211	1.03211	3.97047e-06	3.73041e-05
PP_0422	trpC	Indole-3-glycerol phosphate synthase	623.98	1.03177	1.03177	5.17237e-05	0.000356646
PP_1735	htrB	Lipid A biosynthesis lauroyl acyltransferase	136.155	1.03103	1.03103	3.87233e-06	3.64467e-05
PP_1360	groS	10 kDa chaperonin	882.128	1.02995	1.02995	0.000116762	0.000725345
PP_1121		OmpA family protein	2208.51	-1.0292	1.0292	0.00135568	0.0059616
PP_1721		putative phosphoserine phosphatase	265.781	-1.02914	1.02914	5.09166e-06	4.64384e-05
PP_3178	garK	glycerate kinase	74.2701	-1.02848	1.02848	0.0004511	0.00230066
PP_2188		putative tRNA-(Ms(2)io(6)a)-hydroxylase	164.522	1.02803	1.02803	5.49082e-06	4.94828e-05
PP_4065	mccB	methylcrotonyl-CoA carboxylase biotin-containing	215.931	1.02787	1.02787	0.0115692	0.0355804
PP_5317	ubiC	Probable chorismate pyruvate-lyase	64.5392	1.02626	1.02626	0.000808285	0.00379708
PP_2775		putative glycine betaine	41.8935	-1.02596	1.02596	0.00334978	0.0126789
PP_3452		GGDEF domain protein	54.5525	-1.02579	1.02579	0.00189676	0.00786459
PP_4203		Electron transfer flavoprotein-ubiquinone	1575.14	1.02578	1.02578	4.36217e-09	8.95936e-08
PP_4251	ccoO-I	cytochrome c oxidase subunit, cbb3-type	7718.91	1.02549	1.02549	0.000707392	0.003377
PP_5012		conserved protein of unknown function	187.5	1.02539	1.02539	4.20366e-07	5.0973e-06
PP_4253	ccoP-I	cytochrome c oxidase subunit, cbb3-type	18300.2	1.02538	1.02538	1.8164e-05	0.000140924
PP_4677		CDP-diacylglycerol--serine	487.432	1.02533	1.02533	2.71577e-09	5.94129e-08
PP_3129	galE	UDP-glucose 4-epimerase	406.874	-1.02465	1.02465	2.34617e-06	2.37712e-05
PP_4325	ccmC	protoheme IX reservoir complex subunit	461.912	1.02452	1.02452	9.0173e-08	1.36522e-06
PP_0054		conserved membrane protein of unknown function	44.9905	-1.0239	1.0239	0.00562358	0.0194513
PP_1665	purM	Phosphoribosylformylglycinamidine cyclo-ligase	1251.18	1.0237	1.0237	4.07049e-07	4.99295e-06
PP_0446	rplL	50S ribosomal protein L7	6078.97	1.02365	1.02365	4.80099e-05	0.000333427
PP_3372	cpxR	CpxR-Pasp DNA-binding transcriptional	44.4421	-1.02316	1.02316	0.00374992	0.0139444
PP_2299	tig	Trigger factor	9303.17	1.02041	1.02041	4.80362e-07	5.73296e-06
PP_5031	proY	proline (histidine) APC transporter	32.2456	1.01942	1.01942	0.0172802	0.0496035
PP_1504		conserved protein of unknown function	173.828	-1.01644	1.01644	0.00454195	0.0162317
PP_1219	tolQ	subunit of a proton-driven complex used for	367.434	1.01618	1.01618	8.90148e-06	7.58343e-05
PP_1785	rffG	dTDP-glucose 4,6-dehydratase 2	1812.06	1.01596	1.01596	6.50849e-09	1.27264e-07
PP_4610		conserved protein of unknown function containing	207.814	-1.0146	1.0146	0.000631106	0.0030513
PP_4390	flgC	flagellar basal-body rod protein FlgC	250.438	1.01451	1.01451	0.000527446	0.00262929
PP_0648		conserved protein of unknown function	136.374	-1.01199	1.01199	0.000321299	0.00172321
PP_0718		Sulfate transporter	143.953	-1.01118	1.01118	0.000146878	0.000884438
PP_1670		putative Lipoprotein	362.932	-1.01085	1.01085	1.44604e-05	0.0001154
PP_2853		conserved exported protein of unknown function	1906.9	-1.01019	1.01019	2.83386e-05	0.000208565
PP_4235	dsbD-II	thiol	78.439	1.00618	1.00618	4.13381e-05	0.000292067
PP_0306		conserved protein of unknown function	90.9061	1.0057	1.0057	0.00318876	0.0122178
PP_5618		putative Cro	361.518	-1.00521	1.00521	0.000338078	0.00179327
PP_1248		Transporter, LysE family	196.757	-1.00395	1.00395	4.40502e-05	0.000308759
PP_1741	betX	choline	195.98	-1.00374	1.00374	9.61585e-06	8.11376e-05
PP_1103		ATP-dependent helicase, DEAD box family	61.5614	-1.00342	1.00342	0.00969475	0.0305243
PP_0817	alaC	aminotransferase	1564.21	1.00325	1.00325	4.6354e-06	4.27926e-05
PP_0793	fruB	Phosphotransferase system, fructose-specific	451.291	-1.00306	1.00306	3.68226e-07	4.55895e-06
PP_1623	rpoS	RNA polymerase, sigma S (sigma 38) factor	9856.51	-1.00286	1.00286	0.000112747	0.000704537
PP_3457	mobA	Molybdenum cofactor guanylyltransferase	38.6878	-1.00267	1.00267	0.010666	0.0331686
PP_1877	msrC	free methionine-(R)-sulfoxide reductase	147.938	1.00262	1.00262	3.94369e-05	0.000280882
PP_0076		putative choline betaine-binding protein	192.811	-1.00248	1.00248	0.000226816	0.00128408
PP_4870		Azurin	17224.7	1.00149	1.00149	6.06005e-06	5.39701e-05
PP_0185	algR	Positive alginate biosynthesis regulatory	1308.38	-1.0003	1.0003	9.52156e-06	8.07276e-05

## Sheet: TA8_F83_I1 vs KT2440
Locus_tag	Gene name	Description	baseMean	log2FoldChange(FC)	ABS(log2FC)	pvalue	padj
PP_4116	aceA	isocitrate lyase	32616.3	6.9322	6.9322	1.62979e-31	1.1341e-28
PP_5659		protein of unknown function	1504.49	6.72024	6.72024	2.49628e-103	6.07969e-100
PP_2875		conserved protein of unknown function	2388.49	5.7497	5.7497	7.80227e-117	3.80049e-113
PP_4490	phhA	phenylalanine-4-hydroxylase	101.613	5.035	5.035	1.52453e-39	2.47532e-36
PP_4656	pcaH	protocatechuate 3,4-dioxygenase beta chain	129.139	4.33173	4.33173	3.77997e-20	9.69066e-18
PP_4070		conserved protein of unknown function	128.766	-4.16332	4.16332	2.05863e-15	3.2347e-13
PP_4655	pcaG	protocatechuate 3,4-dioxygenase alpha chain	137.891	3.99878	3.99878	3.45063e-16	6.00286e-14
PP_4244	pvdS	alternative sigma factor	182.094	-3.7183	3.7183	6.77137e-15	9.99495e-13
PP_0352		RNA polymerase sigma-70 factor, ECF subfamily	54.0782	-3.69618	3.69618	1.77782e-17	3.60824e-15
PP_2900		conserved protein of unknown function	170.204	-3.54346	3.54346	4.31766e-15	6.57228e-13
PP_0943		conserved protein of unknown function	50.1063	-3.49483	3.49483	9.12441e-05	0.00167717
PP_1651		two-component response regulator	137.903	-3.46316	3.46316	2.79037e-14	3.4851e-12
PP_1083		(2Fe-2S)-binding protein	39.8815	-3.43233	3.43233	2.14333e-13	2.48575e-11
PP_0356	glcB	malate synthase G	8178.39	3.4202	3.4202	1.41536e-37	1.72355e-34
PP_3576		putative Transmembrane sensor	34.3702	-3.40394	3.40394	4.0188e-07	1.65173e-05
PP_3877		conserved protein of unknown function	24.0612	3.37971	3.37971	1.98062e-08	1.12181e-06
PP_3386	vgrG-II	type 6 secretion system protein	952.623	-3.35189	3.35189	2.73834e-32	2.22308e-29
PP_4491	phhB	pterin-4-alpha-carbinolamine dehydratase	23.9434	3.34575	3.34575	3.04631e-09	1.97847e-07
PP_3387		protein of unknown function	170.564	-3.33832	3.33832	8.41686e-22	2.41168e-19
PP_3749		conserved protein of unknown function	28.0671	-3.24449	3.24449	1.71937e-05	0.000406557
PP_3085		putative Transmembrane sensor	38.6627	-3.10489	3.10489	1.47138e-08	8.63505e-07
PP_4611		RNA polymerase sigma-70 factor, ECF subfamily	34.5959	-3.02873	3.02873	3.78806e-07	1.57706e-05
PP_5540		conserved protein of unknown function	446.015	-2.93613	2.93613	5.58271e-05	0.0010921
PP_0667		RNA polymerase sigma-70 factor, ECF subfamily	98.3536	-2.90108	2.90108	9.92578e-14	1.20871e-11
PP_3385		conserved protein of unknown function	268.791	-2.86459	2.86459	1.58018e-27	8.55227e-25
PP_5421		conserved protein of unknown function	16.8658	2.84373	2.84373	7.67786e-07	2.89914e-05
PP_0703		putative Transmembrane sensor	85.7929	-2.80748	2.80748	8.55825e-08	4.08698e-06
PP_1008		RNA polymerase subunit sigma-24	20.2339	-2.78164	2.78164	1.98549e-07	8.71289e-06
PP_1389		Oxaloacetate decarboxylase	468.787	-2.77264	2.77264	6.51423e-22	1.98318e-19
PP_5338	aspA	aspartate ammonia-lyase	913.351	-2.73811	2.73811	4.64542e-12	4.19034e-10
PP_3388		conserved protein of unknown function	515.83	-2.72214	2.72214	2.52571e-19	6.15136e-17
PP_2698	metE	5-methyltetrahydropteroyltriglutamate-	140.986	2.70186	2.70186	2.91531e-11	2.49131e-09
PP_0161		putative transmembrane sensor	71.7238	-2.69983	2.69983	3.27801e-10	2.49487e-08
PP_0162		RNA polymerase sigma-70 factor, ECF subfamily	27.133	-2.691	2.691	8.34342e-08	4.02384e-06
PP_0685		conserved protein of unknown function	52.3982	-2.68072	2.68072	1.58581e-07	7.15231e-06
PP_2076		conserved protein of unknown function	504.966	-2.65604	2.65604	2.72515e-14	3.4851e-12
PP_0351		putative Transmembrane sensor protein	95.6544	-2.62825	2.62825	4.88895e-12	4.32984e-10
PP_2699		conserved protein of unknown function	186.034	2.62061	2.62061	3.01826e-08	1.6519e-06
PP_2708		conserved protein of unknown function	9.92785	-2.60418	2.60418	0.00438552	0.0360234
PP_1418		putative Tricarboxylate transport protein TctC	66.2454	2.5954	2.5954	0.00201379	0.0198165
PP_1006		putative outer membrane heme receptor	241.652	-2.57835	2.57835	5.61289e-10	3.90577e-08
PP_0704		RNA polymerase sigma-70 factor, ECF subfamily	57.1855	-2.56827	2.56827	1.57569e-08	9.13715e-07
PP_2192		putative RNA polymerase sigma-70 factor, ECF	181.063	-2.56417	2.56417	1.13463e-17	2.51217e-15
PP_1775		Metallo-beta-lactamase family protein	346.809	-2.55958	2.55958	3.27323e-24	1.29706e-21
PP_0425	yhfA	conserved protein of unknown function	143.967	2.53828	2.53828	2.13471e-23	7.42727e-21
PP_4217	fpvA	outer membrane ferripyoverdine receptor FpvA,	4962.86	-2.52832	2.52832	2.48758e-05	0.00054828
PP_1082	bfr-II	bacterioferritin	5031.45	2.5026	2.5026	4.93688e-16	8.01584e-14
PP_2874		conserved protein of unknown function	563.524	-2.47645	2.47645	3.59403e-08	1.94517e-06
PP_3389		conserved membrane protein of unknown function	190.472	-2.45705	2.45705	3.46166e-24	1.29706e-21
PP_0156	pntAA	pyridine nucleotide transhydrogenase subunit	1560.41	2.44256	2.44256	4.07989e-17	7.64352e-15
PP_4637		5-methyltetrahydropteroyltriglutamate-	460.76	2.43124	2.43124	2.0807e-08	1.16495e-06
PP_1185	oprH	Outer membrane protein H1	6411.82	2.41818	2.41818	5.68267e-13	6.01746e-11
PP_4464		Transcriptional regulator, LysR family	11.1888	2.40188	2.40188	0.00280852	0.0263083
PP_0905		conserved exported protein of unknown function	426.931	-2.35252	2.35252	5.42986e-13	5.87752e-11
PP_0945		conserved protein of unknown function	53.7628	-2.33911	2.33911	3.41178e-05	0.000717769
PP_3086		putative RNA polymerase sigma-70 factor	69.5428	-2.33003	2.33003	1.68917e-12	1.64559e-10
PP_5247		conserved protein of unknown function	98.5176	-2.31007	2.31007	2.20735e-12	2.10823e-10
PP_4208		RNA polymerase sigma-70 factor, ECF subfamily	96.377	-2.30535	2.30535	3.97089e-09	2.51197e-07
PP_5307	exbD	TonB-gated outer membrane transporter - gating	381.238	-2.29669	2.29669	1.16806e-14	1.67342e-12
PP_0668		putative Transmembrane sensor	74.3222	-2.29295	2.29295	8.87471e-09	5.47199e-07
PP_0271	gltR-I	DNA-binding response regulator	66.535	-2.27254	2.27254	4.03522e-07	1.65173e-05
PP_2037		putative Aldolase	292.332	2.26168	2.26168	0.000156736	0.00264174
PP_3807		Thioesterase	218.116	-2.26042	2.26042	1.1862e-12	1.17918e-10
PP_0947		conserved membrane protein of unknown function	108.618	-2.25619	2.25619	9.71579e-08	4.59472e-06
PP_5668		conserved membrane protein of unknown function	9.45767	2.25257	2.25257	0.000871751	0.0102075
PP_5747	pntAB	pyridine nucleotide transhydrogenase subunit	169.031	2.23791	2.23791	4.43608e-08	2.27454e-06
PP_0155	pntB	pyridine nucleotide transhydrogenase, beta	2677.67	2.23653	2.23653	8.26461e-35	8.05138e-32
PP_2674	qedH-I	quinoprotein ethanol dehydrogenase	144.553	2.19778	2.19778	3.58875e-09	2.3001e-07
PP_5340	aphA	Acetylpolyamine aminohydrolase	74.9017	2.19511	2.19511	4.79998e-16	8.01584e-14
PP_0239	ssuC	aliphatic sulfonate ABC transporter - permease	23.3017	2.19404	2.19404	3.5175e-05	0.000732211
PP_2036		putative 4-hydroxy-tetrahydrodipicolinate synthase	688.595	2.19128	2.19128	0.000137972	0.00238321
PP_4604		putative permease of the drug	228.835	-2.1889	2.1889	9.63416e-07	3.54123e-05
PP_2035	benE-I	benzoate transport protein	103.293	2.18324	2.18324	0.000133402	0.00232721
PP_0946	sodA	superoxide dismutase (Mn)	260.332	-2.14288	2.14288	0.00146267	0.015289
PP_0944	fumC-I	fumarate hydratase (class 2)	659.627	-2.14159	2.14159	0.000332472	0.00479001
PP_1652	pfeS-II	histidine kinase	86.0549	-2.12873	2.12873	5.34617e-06	0.000153183
PP_0224		Monooxygenase, DszC family	16.7781	2.11937	2.11937	5.00989e-06	0.000145257
PP_4210	pvdT	pyoverdine efflux carrier and ATP binding	188.562	-2.1033	2.1033	1.47431e-06	5.12956e-05
PP_3869		putative Phage sheath protein	16.2938	2.07652	2.07652	0.000808697	0.00960771
PP_0180		putative cytochrome c family protein	439.406	-2.07423	2.07423	3.94102e-12	3.62202e-10
PP_5306	exbB	Biopolymer transport protein ExbB	610.238	-2.06995	2.06995	5.762e-08	2.89347e-06
PP_4213	pvdM	putative dipeptidase	360.985	-2.03033	2.03033	0.00638891	0.0475553
PP_3808		Antibiotic synthesis protein MbtH	61.2103	-2.0205	2.0205	1.98007e-05	0.000454949
PP_3233	fnrB	transcriptional regulator with 4Fe-4S cluster,	33.9209	-2.01706	2.01706	3.84119e-05	0.000792815
PP_1005	hemO	Heme oxygenase	71.1934	-2.0014	2.0014	8.25598e-07	3.09345e-05
PP_1004		conserved protein of unknown function	19.1202	-1.96297	1.96297	3.46333e-05	0.000724029
PP_5308	tonB	Protein TonB	205.36	-1.95122	1.95122	2.15587e-07	9.37611e-06
PP_3433	hpd	4-hydroxyphenylpyruvate dioxygenase	393.066	1.91091	1.91091	2.85884e-10	2.21038e-08
PP_3268		MutT/nudix family protein	20.9446	-1.90955	1.90955	0.000430536	0.00589701
PP_5082	pilN	Type IV pili biogenesis protein PilN	24.1561	-1.89899	1.89899	0.00339095	0.0299227
PP_0482	bfr-I	bacterioferritin	2457.1	1.87303	1.87303	2.21723e-10	1.74196e-08
PP_2257		putative aerotaxis receptor	153.212	1.87241	1.87241	1.48831e-10	1.18846e-08
PP_2697		putative oxidoreductase containing a flavin	15.2352	1.86384	1.86384	0.000859412	0.0100872
PP_4610		conserved protein of unknown function containing	207.814	-1.86054	1.86054	6.56532e-10	4.50418e-08
PP_0270		Sensor histidine kinase	39.8401	-1.84978	1.84978	0.00108828	0.0122826
PP_4211	ompQ	outer membrane pyoverdine efflux protein	84.7372	-1.8422	1.8422	2.2308e-06	7.21026e-05
PP_3777		conserved protein of unknown function	9448.88	-1.83595	1.83595	1.89423e-27	9.22677e-25
PP_4348		putative Cystathionine beta-lyase	17.378	1.83249	1.83249	0.000764356	0.00928473
PP_3776		putative permease (RarD protein)	5828.41	-1.82686	1.82686	1.17285e-27	7.14119e-25
PP_0238	ssuD	alkanesulfonate monooxygenase	49.4653	1.82621	1.82621	1.80224e-08	1.03279e-06
PP_3080	aroF-II	tyr-sensitive phospho-2-dehydro-3-deoxyheptonate	972.651	1.81189	1.81189	1.43582e-07	6.53633e-06
PP_2193		Outer membrane ferric siderophore receptor	94.7049	-1.78885	1.78885	3.73414e-07	1.56802e-05
PP_2731		conserved protein of unknown function	38.9384	-1.7834	1.7834	0.00108333	0.0122719
PP_5695		conserved protein of unknown function	44.7045	-1.7816	1.7816	1.155e-05	0.000294556
PP_0913		conserved exported protein of unknown function	3414.2	-1.76499	1.76499	1.29903e-08	7.81185e-07
PP_3148		putative Glutamine synthetase	226.243	1.74862	1.74862	1.38739e-14	1.93085e-12
PP_4221	pvdI	non-ribosomal peptide synthetase (subunit of	1695.35	-1.74601	1.74601	1.53077e-05	0.000367311
PP_2357		putative Type 1 pili protein CsuB	1699.17	-1.74384	1.74384	3.80525e-10	2.76647e-08
PP_2242	fepA	ferric enterobactin transport system outer	49.9366	-1.72072	1.72072	2.33309e-07	1.00571e-05
PP_4607		putative Transmembrane sensor	58.1457	-1.69339	1.69339	0.000379743	0.00531531
PP_2851		conserved protein of unknown function	56.6622	-1.68232	1.68232	1.21582e-05	0.00030527
PP_2075		conserved membrane protein of unknown function	57.7474	-1.67692	1.67692	3.15645e-06	9.66984e-05
PP_0350		Outer membrane ferrichrome-iron receptor	67.5008	-1.67458	1.67458	7.52402e-05	0.00143452
PP_5262	norM	Probable multidrug resistance protein NorM	97.7984	-1.67303	1.67303	3.57401e-10	2.67831e-08
PP_3155		putative Outer membrane ferric siderophore	307.912	-1.67156	1.67156	7.07965e-06	0.000192653
PP_3444		Glyoxalase family protein	61.1433	-1.66256	1.66256	1.76364e-05	0.000413014
PP_4209	pvdR	ABC export system, membrane fusion protein	94.5353	-1.65981	1.65981	2.97987e-05	0.000641801
PP_5236		conserved protein of unknown function	1021.07	-1.63057	1.63057	8.5693e-18	1.98767e-15
PP_3778	proC	Pyrroline-5-carboxylate reductase	13653.7	-1.62446	1.62446	1.27755e-17	2.70564e-15
PP_3147	potF-II	putrescine-binding periplasmic protein	95.3571	1.6126	1.6126	2.23517e-06	7.21026e-05
PP_4423		conserved protein of unknown function	94.2576	1.60155	1.60155	5.63768e-07	2.21461e-05
PP_2006		conserved membrane protein of unknown function	2289.59	-1.59016	1.59016	0.000129785	0.00228225
PP_2007		P-47-related protein	277.568	-1.57894	1.57894	5.95264e-06	0.000164746
PP_0534		putative Transcriptional regulator PfeR	31.8455	-1.57739	1.57739	0.000251099	0.0038222
PP_4362		conserved protein of unknown function	175.445	-1.57458	1.57458	1.45073e-06	5.08381e-05
PP_3798		conserved protein of unknown function	63.7524	-1.57412	1.57412	3.68056e-06	0.000110667
PP_0240	ssuB	Aliphatic sulfonates import ATP-binding protein	19.1848	1.56043	1.56043	0.00405474	0.0339942
PP_2112	acnA-I	aconitate hydratase 1	2716.48	-1.55861	1.55861	5.85136e-06	0.000164746
PP_0700		putative Transmembrane sensor	87.5237	-1.54535	1.54535	3.05264e-05	0.000652167
PP_1186	phoP	two component system DNA-binding transcriptional	1107.55	1.5429	1.5429	1.9712e-21	5.33429e-19
PP_5598		conserved protein of unknown function	93.4541	-1.53392	1.53392	0.00295496	0.0272159
PP_2434		conserved protein of unknown function	24.1956	-1.53301	1.53301	0.00204467	0.0200798
PP_0806		putative Surface adhesion protein	83200.4	-1.5319	1.5319	2.43408e-05	0.000538928
PP_2010		Cytochrome b561	462.574	1.53018	1.53018	4.73353e-10	3.3416e-08
PP_4212	pvdP	pyoverdine biosynthesis related protein	354.917	-1.52829	1.52829	1.62554e-05	0.000386244
PP_4688		Heme	76.9987	-1.52558	1.52558	2.31305e-05	0.00051683
PP_4214	pvdN	pyoverdine biosynthesis related protein	240.813	-1.5253	1.5253	0.000523789	0.00693309
PP_5406		transposase	122.992	1.52307	1.52307	1.1536e-08	7.02398e-07
PP_0349		putative Membrane protein	13.7832	-1.51915	1.51915	0.00625773	0.0469667
PP_0170		ABC transporter, periplasmic binding protein	19.5106	1.50802	1.50802	0.00527186	0.0417548
PP_2828		conserved protein of unknown function	43.6962	-1.50716	1.50716	1.41087e-05	0.000347088
PP_3741	mrdA-I	transpeptidase (penicillin-binding protein 2)	32.3498	1.50694	1.50694	0.000451522	0.00610935
PP_2149	gapB	glyceraldehyde-3-phosphate dehydrogenase	11742.3	1.50484	1.50484	2.69002e-22	8.73538e-20
PP_1187	phoQ	sensor protein	349.793	1.49048	1.49048	4.03139e-10	2.88778e-08
PP_3775		putative sarcosine oxidase	8866.16	-1.48626	1.48626	9.64457e-17	1.73995e-14
PP_3179		Transcriptional regulator, LysR family	51.6629	1.47881	1.47881	0.000714704	0.00879165
PP_2729		conserved protein of unknown function	529.034	-1.46455	1.46455	8.5506e-13	8.8617e-11
PP_1625	fdxA	Ferredoxin 1	418.837	1.46154	1.46154	0.000244756	0.00375777
PP_4621	hmgA	Homogentisate 1,2-dioxygenase	60.4448	1.44686	1.44686	0.0002088	0.00333933
PP_4194	gltA	citrate synthase	11480.5	1.44476	1.44476	3.35767e-06	0.00010222
PP_2419		conserved membrane protein of unknown function	46.3692	-1.4401	1.4401	0.000110504	0.00195734
PP_0897		Fumarate hydratase, class I	6735.32	1.43668	1.43668	4.9519e-07	1.99345e-05
PP_3799		conserved exported protein of unknown function	51.8078	-1.42868	1.42868	0.000133609	0.00232721
PP_4886		conserved protein of unknown function	433.849	-1.42762	1.42762	4.6027e-13	5.0954e-11
PP_5612		protein of unknown function	273.793	1.42411	1.42411	1.12448e-05	0.00028828
PP_2258		Sensory box protein	202.463	1.41925	1.41925	9.33091e-06	0.00024568
PP_5405		transposase	371.346	1.41841	1.41841	5.15908e-08	2.61769e-06
PP_4432		putative Xaa-Pro aminopeptidase	368.457	1.40917	1.40917	1.67533e-14	2.26681e-12
PP_4137		putative Outer membrane siderophore receptor	76.9181	1.4035	1.4035	1.52098e-05	0.000367311
PP_0864	speC	ornithine decarboxylase	1357.61	1.39419	1.39419	1.46514e-09	9.64416e-08
PP_4793		conserved protein of unknown function	266.583	-1.38048	1.38048	0.00118133	0.012931
PP_4689		Heme	203.326	-1.377	1.377	1.31745e-09	8.79082e-08
PP_2256		Transcriptional regulator, Cro	89.6988	-1.37289	1.37289	0.000282805	0.00419875
PP_5721		conserved protein of unknown function	28.4384	-1.37267	1.37267	0.00141522	0.0149211
PP_5312		conserved exported protein of unknown function	58.0611	1.37085	1.37085	7.37401e-05	0.00141413
PP_4207		conserved protein of unknown function	61.6808	-1.3696	1.3696	0.00186963	0.0187754
PP_4959		diguanylate cyclase	5460.4	-1.36882	1.36882	3.4777e-12	3.25767e-10
PP_0237	ssuA	aliphatic sulfonate ABC transporter -	28.5281	1.36838	1.36838	0.00010278	0.00185422
PP_4245	pvdY	hydroxyproline acetylase	651.779	-1.36282	1.36282	4.19686e-08	2.17477e-06
PP_2623		conserved protein of unknown function	20.0997	1.35997	1.35997	0.00576081	0.04433
PP_1660		conserved protein of unknown function	308.238	-1.35933	1.35933	0.000428134	0.00589107
PP_1661		putative Dehydrogenase subunit	2753.31	-1.35762	1.35762	0.00139517	0.0147737
PP_1408		(R)-3-hydroxydecanoyl-ACP:CoA transacylase	7776.21	-1.35522	1.35522	3.64296e-06	0.000110217
PP_5347	pycA	pyruvate carboxylase subunit A	9163.48	1.34607	1.34607	1.94179e-24	8.59861e-22
PP_3823		Cytochrome c-type protein	413.342	1.34438	1.34438	0.000162267	0.00271617
PP_3503		Sigma-54 dependent transcriptional regulator	124.762	-1.34315	1.34315	5.69697e-07	2.21999e-05
PP_0575		conserved membrane protein of unknown function	137.412	-1.34015	1.34015	9.66913e-07	3.54123e-05
PP_4888		putative methyl-accepting chemotaxis transducer	96.3818	1.33967	1.33967	0.00165201	0.0168699
PP_5008		Poly granule-associated protein	646.327	-1.3349	1.3349	2.08487e-17	4.06215e-15
PP_3774		conserved protein of unknown function	58.2711	1.32835	1.32835	0.000588655	0.00759302
PP_5614		protein of unknown function	29.1337	-1.32489	1.32489	0.00131862	0.0141539
PP_4612		putative FecR protein	51.9788	-1.3217	1.3217	0.000333363	0.00479001
PP_3340		putative TonB-dependent receptor	71.352	1.32026	1.32026	7.49351e-06	0.000202783
PP_0687	ispB	octaprenyl diphosphate synthase	900.254	1.31564	1.31564	4.14574e-08	2.17477e-06
PP_4216	pvdE	pyoverdine ABC export system, fused ATPase and	360.825	-1.30735	1.30735	0.00300725	0.0275547
PP_5607		conserved membrane protein of unknown function	76.1239	-1.30081	1.30081	8.66792e-05	0.0015993
PP_5346	pycB	pyruvate carboxylase subunit B	11618.2	1.29884	1.29884	3.34946e-13	3.79424e-11
PP_3253		Carboxylate-amine ligase PP_3253	20.2171	-1.29432	1.29432	0.00435124	0.0358022
PP_4836		conserved exported protein of unknown function	57.2266	1.29427	1.29427	4.46507e-05	0.000898733
PP_0675	gdhA	glutamate dehydrogenase, NADP-dependent	1546.88	1.28822	1.28822	1.17731e-12	1.17918e-10
PP_0091		putative lipoprotein	118.665	-1.28802	1.28802	0.0030769	0.0278505
PP_1640	yohC	putative inner membrane protein of unknown	189.832	-1.28614	1.28614	0.000133775	0.00232721
PP_0683		conserved protein of unknown function	103.579	-1.28459	1.28459	0.00132929	0.0142308
PP_3593		Amino acid ABC transporter, periplasmic binding	75.3978	1.27789	1.27789	2.90997e-05	0.000629977
PP_0903		conserved protein of unknown function	172.302	1.27682	1.27682	0.000207877	0.00333933
PP_4495	aroP-II	aromatic amino acid transport protein	505.185	1.27644	1.27644	1.83565e-05	0.000425784
PP_3368		Major facilitator family transporter	202.628	-1.27008	1.27008	9.79275e-10	6.62507e-08
PP_3801		putative Cation ABC transporter, periplasmic	269.616	-1.25446	1.25446	8.13609e-05	0.00152426
PP_5360		conserved protein of unknown function	53.1437	-1.25331	1.25331	0.0015966	0.0164073
PP_1844	plsC	1-acyl-sn-glycerol-3-phosphate acyltransferase	54.8387	1.25034	1.25034	4.35472e-05	0.000883826
PP_1059	ytnA	Uncharacterized amino acid permease YtnA	253.618	1.25013	1.25013	4.40365e-05	0.000890049
PP_2768		putative Branched-chain amino acid ABC	102.487	-1.24462	1.24462	0.0001547	0.00261648
PP_5279		conserved protein of unknown function	49.8684	1.24379	1.24379	0.00623074	0.0469064
PP_5367		Transketolase domain protein	78.2379	-1.24183	1.24183	0.00123636	0.0134727
PP_2171		Transporter, LysE family	72.1267	-1.23317	1.23317	5.50617e-06	0.000156845
PP_1690		conserved protein of unknown function	44.4395	-1.23304	1.23304	0.000913056	0.0105641
PP_0863		conserved protein of unknown function	85.8818	-1.22971	1.22971	0.000714739	0.00879165
PP_2537		conserved protein of unknown function	68.9431	-1.22742	1.22742	0.00075019	0.00918135
PP_4687	hmuV	Hemin import ATP-binding protein HmuV	67.908	-1.22733	1.22733	0.000285319	0.00419875
PP_2901	pvdQ	Acyl-homoserine lactone acylase	306.612	-1.21874	1.21874	0.00117047	0.0128409
PP_1400	kgtP	Alpha-ketoglutarate permease	466.569	1.21723	1.21723	0.00573584	0.0442077
PP_4363		Sensor histidine kinase	1993.29	-1.2128	1.2128	6.69963e-07	2.5696e-05
PP_1251	mqo-II	malate:quinone oxidoreductase	1265.58	-1.21157	1.21157	0.000273197	0.00408204
PP_3779		Transcriptional regulator, LysR family	2193.07	-1.20694	1.20694	1.47981e-13	1.75809e-11
PP_4189	sucA	2-oxoglutarate decarboxylase, thiamine-requiring	27537	1.19853	1.19853	7.08661e-08	3.45189e-06
PP_1090	bvgA	putative Virulence factors positive	187.792	-1.19754	1.19754	4.04963e-08	2.16767e-06
PP_1840		conserved protein of unknown function	208.282	-1.19742	1.19742	0.0034326	0.0302355
PP_0788		conserved protein of unknown function	189.75	1.19712	1.19712	5.28919e-07	2.0946e-05
PP_2709		putative Long-chain-fatty-acid--CoA ligase	77.4959	-1.19687	1.19687	0.000430987	0.00589701
PP_5610		protein of unknown function	92.5777	1.1941	1.1941	1.67135e-06	5.65359e-05
PP_4188	sucB	2-oxoglutarate dehydrogenase	10468.2	1.18536	1.18536	4.1365e-06	0.000123613
PP_0545	aldB-I	aldehyde dehydrogenase	19043.9	1.179	1.179	0.000136158	0.00236024
PP_2432	nfnB	6,7-dihydropteridine reductase	362.704	1.1787	1.1787	8.62269e-11	7.00018e-09
PP_2730		putative Lipoprotein	276.744	-1.17421	1.17421	2.29352e-05	0.000514827
PP_4605		Transcriptional regulator, AraC family	205.613	-1.17405	1.17405	2.30493e-06	7.38638e-05
PP_0418	estP	Esterase EstP	457.5	1.17402	1.17402	0.00256038	0.0242638
PP_5030	hutI	Imidazolonepropionase	69.5242	1.17287	1.17287	0.00157663	0.0163053
PP_2927		conserved protein of unknown function	115.826	-1.17121	1.17121	2.65253e-05	0.000582004
PP_4191	sdhA	succinate dehydrogenase flavoprotein subunit	13927.1	1.1702	1.1702	2.25883e-08	1.25031e-06
PP_5334		conserved membrane protein of unknown function	76.4482	-1.17002	1.17002	0.00548243	0.0429134
PP_2569		Metabolite MFS transporter, MHS family	194.038	-1.16858	1.16858	0.000321182	0.00464236
PP_1659		conserved exported protein of unknown function	1271.38	-1.16812	1.16812	0.00587173	0.0448295
PP_0203		putative dipeptidase	1791.48	-1.16722	1.16722	1.61976e-06	5.51737e-05
PP_4409		Site-specific recombinase, phage integrase	26.1078	1.16482	1.16482	0.00505993	0.0404048
PP_0639		conserved protein of unknown function	1573.6	1.16431	1.16431	2.39183e-06	7.61477e-05
PP_2942		Response regulator	1978.56	-1.15783	1.15783	5.94345e-07	2.29766e-05
PP_3425		Efflux transporter RND family, MFP subunit	36.104	-1.1557	1.1557	0.00390012	0.0330814
PP_0014		putative transposase	127.041	1.15233	1.15233	1.8024e-05	0.000420071
PP_0199	qmcA	putative membrane protease family, stomatin	50.8099	-1.15126	1.15126	0.00154084	0.015969
PP_2728		conserved protein of unknown function	44.648	-1.14572	1.14572	0.000707563	0.00874756
PP_5211		ChaC-related protein	757.326	-1.14281	1.14281	6.37894e-08	3.13857e-06
PP_2990		Transcriptional regulator, MerR family	195.02	-1.14189	1.14189	5.92436e-06	0.000164746
PP_1813		ComEA-related protein	263.327	-1.13991	1.13991	0.00062648	0.00794684
PP_5341	potF-IV	putrescine-binding periplasmic protein	251.636	1.13907	1.13907	5.15248e-06	0.000148507
PP_3828	modA	Molybdate-binding periplasmic protein	160.943	1.13212	1.13212	9.97684e-05	0.00180659
PP_0805		Outer membrane efflux protein	880.494	-1.12643	1.12643	1.60325e-05	0.000382816
PP_2462		conserved protein of unknown function	146.623	1.12336	1.12336	0.000400669	0.00559215
PP_1199		toxin-antitoxin system, higB toxin like	269.845	-1.11878	1.11878	2.57916e-06	8.15786e-05
PP_0326	soxG	sarcosine oxidase subunit gamma	55.1518	-1.11874	1.11874	0.0029557	0.0272159
PP_5419	atpB	ATP synthase subunit a	3700.15	1.11762	1.11762	1.17257e-07	5.38831e-06
PP_3802		putative Cation ABC transporter, ATP-binding	137.595	-1.1142	1.1142	0.000537277	0.00709234
PP_2732		conserved protein of unknown function	696.436	-1.11257	1.11257	7.85227e-05	0.00148348
PP_5451		protein of unknown function	519.963	-1.11164	1.11164	0.00273095	0.0256309
PP_3677		conserved protein of unknown function	1187.69	1.10674	1.10674	1.40362e-08	8.33783e-07
PP_0323	soxB	sarcosine oxidase subunit beta	152.604	-1.10106	1.10106	0.000545423	0.00718042
PP_3797		conserved membrane protein of unknown function	342.387	-1.09808	1.09808	0.000248512	0.00379468
PP_3376	ptxD	putative phosphonate dehydrogenase	2404.2	1.09772	1.09772	0.006489	0.0481196
PP_4243	pvdL	non-ribosomal peptide synthase (subunit of	2736.32	-1.09349	1.09349	0.005799	0.0445304
PP_0676		putative Transcription elongation factor	34.8145	-1.09306	1.09306	0.00308075	0.0278505
PP_2339	acnB	bifunctional aconitate hydratase 2 and	23001.5	1.09238	1.09238	2.98276e-06	9.19557e-05
PP_0536		conserved protein of unknown function	222.664	-1.09208	1.09208	0.00310447	0.0280035
PP_3579		conserved membrane protein of unknown function	41.6232	-1.08738	1.08738	0.003349	0.029714
PP_0087		conserved exported protein of unknown function	915.055	-1.08193	1.08193	0.00373281	0.0318992
PP_4557		conserved exported protein of unknown function	83.8493	-1.07921	1.07921	0.000881806	0.0102758
PP_4192	sdhD	succinate dehydrogenase hydrophobic membrane	603.855	1.07822	1.07822	1.72229e-14	2.26738e-12
PP_2737		Oxidoreductase, short-chain	150.709	-1.07453	1.07453	6.8474e-05	0.00132883
PP_3230		Phosphoribosyl transferase domain protein	290.205	-1.07317	1.07317	7.63631e-07	2.89914e-05
PP_0320		Methyl-accepting chemotaxis transducer	134.854	1.07313	1.07313	0.00675657	0.0497149
PP_0423		conserved protein of unknown function	76.4633	1.07254	1.07254	4.15667e-05	0.00085072
PP_0812	cyoA	cytochrome bo terminal oxidase subunit II	5984.1	1.06749	1.06749	1.95077e-06	6.42042e-05
PP_1364		conserved exported protein of unknown function	923.868	-1.06643	1.06643	0.000231743	0.00360645
PP_3146		putative Oxidoreductase	66.1829	1.06265	1.06265	0.00371799	0.0318284
PP_4350		Aminotransferase, class V, NifS	81.2639	1.06185	1.06185	0.000696898	0.00865877
PP_0803		Protein secretion ABC efflux system, membrane	868.239	-1.05922	1.05922	0.000172701	0.00286131
PP_4016	purB	5'-phosphoribosyl-4-(N-succinocarboxamide)-5-	1801.6	1.05844	1.05844	1.05516e-06	3.8356e-05
PP_4187	lpdG	dihydrolipoyl dehydrogenase	18355.1	1.05474	1.05474	6.28779e-09	3.92665e-07
PP_2943		putative Cytochrome c551 peroxidase	477.589	-1.05002	1.05002	5.13471e-07	2.05009e-05
PP_5165	plpB	NLPA lipoprotein	481.858	1.04724	1.04724	1.78719e-06	5.9626e-05
PP_0544		Ethanolamine transporter	107.879	1.04397	1.04397	0.00231463	0.0222378
PP_2885		putative Transporter	260.213	-1.04205	1.04205	4.20933e-07	1.70864e-05
PP_4524		putative Sodium-solute symporter	40.0239	-1.03321	1.03321	0.00194482	0.0193331
PP_4154		putative class 3 aminotransferase	576.456	1.0299	1.0299	3.73547e-10	2.75689e-08
PP_3591	dpkA	Delta 1-piperideine-2-carboxylate reductase	143.068	1.02943	1.02943	0.000495775	0.00661621
PP_2277		conserved protein of unknown function	1054.52	1.02778	1.02778	1.5135e-06	5.19174e-05
PP_1576		putative Immunity protein	239.966	-1.02678	1.02678	0.000586276	0.00759302
PP_2326		Universal stress protein	228.704	-1.02483	1.02483	0.00313633	0.0281864
PP_0804		Protein secretion ABC efflux system, permease	1763.31	-1.02465	1.02465	0.000315081	0.00458137
PP_2358		putative Type 1 pili subunit CsuA	350.263	-1.02422	1.02422	0.00036708	0.00515288
PP_3676		conserved protein of unknown function	764.75	1.02003	1.02003	1.66514e-07	7.37356e-06
PP_0528	ispA	farnesyl diphosphate synthase	328.324	1.01624	1.01624	1.21423e-05	0.00030527
PP_0722	prs	Ribose-phosphate pyrophosphokinase	3955.69	1.01291	1.01291	0.000209352	0.00333933
PP_0322	glyA-I	serine hydroxymethyltransferase	169.135	-1.00887	1.00887	0.000265999	0.0040114
PP_4282	aqpZ	Aquaporin Z	344.307	-1.00423	1.00423	0.000109034	0.00193833
PP_4743		conserved protein of unknown function	358.171	1.00297	1.00297	0.000825109	0.00977885
PP_3287	fnrC	transcriptional regulator with 4Fe-4S cluster;	521.346	-1.00227	1.00227	1.08395e-05	0.00027936
PP_4606		putative Outer membrane ferric siderophore	60.8021	-1.00111	1.00111	0.00333155	0.0296131
PP_4100		Transcriptional regulator, Cro	236.027	-1.00016	1.00016	2.78134e-05	0.000604817
PP_4885		conserved protein of unknown function	712.928	-1.00008	1.00008	7.66857e-06	0.000206374

## Sheet: TA9_F60_I1 vs KT2440
Locus_tag	Gene name	Description	baseMean	log2FoldChange(FC)	ABS(log2FC)	pvalue	padj
PP_4929		Transcriptional regulator, LysR family	83.2346	3.47984	3.47984	2.33892e-42	1.12126e-40
PP_4930	emrE	putative small multidrug resistance protein	54.4461	2.71024	2.71024	2.70851e-10	2.21872e-09
PP_3781		Oxygen-independent Coproporphyrinogen III	10239.9	-9.04322	9.04322	2.3305e-184	1.83543e-181
PP_3782		conserved protein of unknown function	228.357	-8.71709	8.71709	4.41412e-16	5.82178e-15
PP_3783	syrB	syringomycin biosynthesis enzyme 2	11019.2	-8.71644	8.71644	2.89619e-238	3.19334e-235
PP_0806		putative Surface adhesion protein	83200.4	-8.65934	8.65934	1.57986e-162	8.70978e-160
PP_3784		conserved protein of unknown function	8489.21	-8.21408	8.21408	2.19761e-203	2.01924e-200
PP_1659		conserved exported protein of unknown function	1271.38	-7.36935	7.36935	1.884e-59	1.73108e-57
PP_1661		putative Dehydrogenase subunit	2753.31	-7.03269	7.03269	2.63843e-68	3.03035e-66
PP_1660		conserved protein of unknown function	308.238	-6.98021	6.98021	2.81908e-33	9.65317e-32
PP_5628		conserved protein of unknown function	70.6397	-6.96759	6.96759	7.27945e-11	6.29022e-10
PP_3162	benB	benzoate 1,2-dioxygenase subunit beta	23.0682	-6.70566	6.70566	4.61223e-06	2.21106e-05
PP_3785		conserved protein of unknown function	8316.27	-6.67277	6.67277	2.26123e-157	1.13329e-154
PP_3778	proC	Pyrroline-5-carboxylate reductase	13653.7	-6.41629	6.41629	1.97946e-291	3.63758e-288
PP_5073		conserved exported protein of unknown function	340.116	6.38467	6.38467	1.17696e-146	3.81681e-144
PP_5540		conserved protein of unknown function	446.015	-6.2918	6.2918	1.91664e-19	3.21168e-18
PP_1750	asnB	asparagine synthetase	212.169	6.28958	6.28958	1.33978e-83	2.3082e-81
PP_3776		putative permease (RarD protein)	5828.41	-6.27971	6.27971	1.19596e-294	3.29667e-291
PP_1288	algD	GDP-mannose 6-dehydrogenase	78.0399	6.22207	6.22207	4.03633e-57	3.47692e-55
PP_3777		conserved protein of unknown function	9448.88	-6.19529	6.19529	0	0
PP_1632		conserved protein of unknown function	16.203	-6.1754	6.1754	8.94284e-05	0.000350653
PP_1245		conserved exported protein of unknown function	796.155	-6.15453	6.15453	6.57771e-73	8.05843e-71
PP_1246		conserved exported protein of unknown function	1873.84	-6.12782	6.12782	4.10144e-82	6.85188e-80
PP_0804		Protein secretion ABC efflux system, permease	1763.31	-6.05779	6.05779	1.01675e-100	2.1559e-98
PP_3929		conserved protein of unknown function	27.9755	6.04894	6.04894	2.08518e-29	6.05032e-28
PP_3379	kguE	putative epimerase	908.593	-5.94025	5.94025	2.68221e-29	7.5444e-28
PP_5467		conserved exported protein of unknown function	1652.17	-5.93848	5.93848	2.81118e-110	6.45751e-108
PP_0805		Outer membrane efflux protein	880.494	-5.82704	5.82704	2.64221e-90	5.395e-88
PP_3775		putative sarcosine oxidase	8866.16	-5.81641	5.81641	3.41318e-264	4.70421e-261
PP_3494		conserved exported protein of unknown function	54.1571	-5.79994	5.79994	0.000243621	0.000880132
PP_3631	htrG	putative signal transduction protein	90.245	5.78097	5.78097	3.30293e-90	6.50324e-88
PP_2373		conserved protein of unknown function	4.26292	-5.76828	5.76828	0.000430427	0.00147847
PP_3385		conserved protein of unknown function	268.791	-5.74825	5.74825	1.94653e-41	9.17197e-40
PP_2172		conserved exported protein of unknown function	23.899	5.74423	5.74423	3.53162e-29	9.83325e-28
PP_3786	aspC	aminotransferase	4170.94	-5.67545	5.67545	4.46399e-112	1.07e-109
PP_3928		conserved exported protein of unknown function	1.44692	5.64999	5.64999	0.00124519	0.00389819
PP_5503		putative CheA signal transduction histidine	16.9879	5.60097	5.60097	2.71702e-19	4.51172e-18
PP_4614		conserved protein of unknown function	61.3366	5.54508	5.54508	1.3459e-56	1.10746e-54
PP_5191		conserved exported protein of unknown function	14.0238	5.39239	5.39239	1.17813e-17	1.732e-16
PP_3386	vgrG-II	type 6 secretion system protein	952.623	-5.34188	5.34188	1.63669e-71	1.96153e-69
PP_0216		putative sensory box	143.185	5.3191	5.3191	1.08799e-109	2.39923e-107
PP_3969		Response regulator	3.24216	5.30408	5.30408	2.61722e-05	0.000112373
PP_3378	kguK	putative 2-ketogluconokinase	989.388	-5.27926	5.27926	4.80268e-23	1.01058e-21
PP_3788		putative Non-ribosomal peptide synthetase	5035.7	-5.27557	5.27557	1.62951e-145	4.72814e-143
PP_2446		conserved exported protein of unknown function	5.87555	-5.1952	5.1952	0.00142214	0.00438984
PP_0803		Protein secretion ABC efflux system, membrane	868.239	-5.19458	5.19458	8.26535e-75	1.08492e-72
PP_5458		conserved exported protein of unknown function	416.731	-5.19018	5.19018	1.48589e-05	6.62226e-05
PP_1749		GNAT family acetyltransferase	191.163	5.17087	5.17087	4.74211e-150	1.74288e-147
PP_1829		Hydrolase, alpha	20.4051	5.10193	5.10193	1.58101e-23	3.37833e-22
PP_3455		Multidrug efflux RND membrane fusion protein	234.453	5.06587	5.06587	6.56905e-146	2.01195e-143
PP_5682		conserved protein of unknown function	4.7742	-5.01779	5.01779	0.00214204	0.00634556
PP_3388		conserved protein of unknown function	515.83	-5.01125	5.01125	8.97458e-50	6.03376e-48
PP_4959		diguanylate cyclase	5460.4	-5.00395	5.00395	3.28122e-170	2.26117e-167
PP_5531		conserved protein of unknown function	928.637	-4.94992	4.94992	1.24995e-84	2.29699e-82
PP_4738		conserved exported protein of unknown function	11.869	4.91505	4.91505	5.85097e-12	5.52336e-11
PP_1729		conserved protein of unknown function	23.6555	-4.84532	4.84532	1.83732e-06	9.34421e-06
PP_2900		conserved protein of unknown function	170.204	-4.78718	4.78718	2.47165e-13	2.61539e-12
PP_2359		putative Type 1 pili subunit CsuA	904.478	-4.78401	4.78401	4.57506e-44	2.31397e-42
PP_3456	mexB	Multidrug resistance protein MexB	413.159	4.7836	4.7836	6.99459e-143	1.92806e-140
PP_5008		Poly granule-associated protein	646.327	-4.73706	4.73706	1.18057e-113	2.95841e-111
PP_3780		conserved protein of unknown function	9.47093	-4.72361	4.72361	0.00204659	0.0060824
PP_2006		conserved membrane protein of unknown function	2289.59	-4.71762	4.71762	6.91443e-37	2.82365e-35
PP_1748		conserved protein of unknown function	64.9406	4.68934	4.68934	3.19388e-55	2.51541e-53
PP_0023		conserved hypothetical protein	37.8197	-4.61917	4.61917	3.80092e-09	2.71783e-08
PP_5620		conserved protein of unknown function	3407.66	-4.60511	4.60511	6.44697e-47	3.78108e-45
PP_3376	ptxD	putative phosphonate dehydrogenase	2404.2	-4.59051	4.59051	1.87068e-38	7.87255e-37
PP_1408		(R)-3-hydroxydecanoyl-ACP:CoA transacylase	7776.21	-4.58293	4.58293	9.23963e-71	1.08379e-68
PP_5037		lipocalin family lipoprotein	119.292	4.56667	4.56667	1.74214e-79	2.74412e-77
PP_3158		conserved exported protein of unknown function	27.867	4.54762	4.54762	1.09101e-19	1.86215e-18
PP_3930		conserved exported protein of unknown function	45.0586	4.54717	4.54717	1.95553e-38	8.1673e-37
PP_1839		conserved protein of unknown function	5.31634	4.54503	4.54503	9.35792e-08	5.67549e-07
PP_2441		conserved protein of unknown function	6.26784	-4.53329	4.53329	0.00443897	0.0121029
PP_4139		conserved protein of unknown function	6.77818	4.52107	4.52107	3.14279e-08	2.02409e-07
PP_4010	cspD	DNA replication inhibitor	320.995	-4.51517	4.51517	7.7849e-36	2.98043e-34
PP_0092		putative lipoprotein	41.0936	4.50392	4.50392	1.64904e-39	7.21522e-38
PP_4422	gabD-II	succinate-semialdehyde dehydrogenase (NADP+)	982.538	-4.48069	4.48069	4.68043e-15	5.75965e-14
PP_4856		Ferritin, Dps family protein	79.6213	4.47261	4.47261	9.57412e-51	6.68128e-49
PP_2007		P-47-related protein	277.568	-4.46441	4.46441	7.19433e-31	2.26642e-29
PP_4044		conserved protein of unknown function	41.9651	-4.44703	4.44703	1.64966e-08	1.09971e-07
PP_1284	algE	Alginate production protein AlgE	18.3525	4.44254	4.44254	4.42691e-17	6.27393e-16
PP_3164	benD	1,6-dihydroxycyclohexa-2,4-diene-1-carboxylate	17.263	-4.42735	4.42735	6.85858e-07	3.74741e-06
PP_3377	kguT	2-ketogluconate transporter, putative	874.025	-4.42229	4.42229	1.39678e-10	1.16497e-09
PP_0837	ycfJ	putative regulator of flagellation	771.297	4.41961	4.41961	5.29411e-149	1.82415e-146
PP_0086		conserved protein of unknown function	95.4413	-4.40244	4.40244	6.37129e-10	5.03945e-09
PP_3018		conserved protein of unknown function	8.7552	-4.40241	4.40241	0.00348113	0.00979158
PP_3387		protein of unknown function	170.564	-4.39768	4.39768	7.37329e-26	1.72974e-24
PP_3787		conserved protein of unknown function	1722.06	-4.37689	4.37689	6.47523e-63	6.2628e-61
PP_2944		Sensor histidine kinase	1036.74	-4.35023	4.35023	1.18251e-80	1.9174e-78
PP_0258	ygaU	regulator of murein cross-linking	5946.6	-4.33801	4.33801	4.12402e-120	1.08265e-117
PP_2357		putative Type 1 pili protein CsuB	1699.17	-4.30303	4.30303	1.07928e-65	1.12266e-63
PP_0330		hypothetical protein	97.8681	4.28745	4.28745	9.47371e-57	7.91342e-55
PP_4282	aqpZ	Aquaporin Z	344.307	-4.27081	4.27081	1.59466e-53	1.22102e-51
PP_2035	benE-I	benzoate transport protein	103.293	-4.2546	4.2546	2.13597e-18	3.32644e-17
PP_2076		conserved protein of unknown function	504.966	-4.25446	4.25446	7.7754e-36	2.98043e-34
PP_5702		conserved protein of unknown function	167.59	4.25323	4.25323	7.56314e-65	7.58102e-63
PP_2358		putative Type 1 pili subunit CsuA	350.263	-4.23626	4.23626	7.18776e-47	4.17117e-45
PP_4534		conserved protein of unknown function	16.2427	-4.21572	4.21572	7.53646e-06	3.5151e-05
PP_2037		putative Aldolase	292.332	-4.1948	4.1948	3.80799e-16	5.05866e-15
PP_2034		conserved membrane protein of unknown function	79.4921	-4.17095	4.17095	2.3017e-16	3.11776e-15
PP_4364		putative Anti-sigma F factor antagonist	228.827	-4.164	4.164	2.44359e-29	6.98005e-28
PP_5239	yifB	putative ATP-dependent chelatase	223.165	-4.16388	4.16388	7.51282e-41	3.45151e-39
PP_2374		conserved protein of unknown function	21.7197	-4.16263	4.16263	2.17869e-08	1.4316e-07
PP_3779		Transcriptional regulator, LysR family	2193.07	-4.15621	4.15621	5.75255e-156	2.64282e-153
PP_0085		conserved protein of unknown function	93.1442	4.15349	4.15349	4.29819e-47	2.54795e-45
PP_0907		RND efflux membrane fusion protein-related	218.929	-4.14591	4.14591	1.92637e-49	1.26429e-47
PP_2125	yegS	lipid kinase	45.1228	4.13139	4.13139	1.10426e-40	4.98998e-39
PP_5038		conserved lipoprotein of unknown function	7.53585	4.12426	4.12426	2.67808e-08	1.74725e-07
PP_3266		conserved protein of unknown function	18.3195	4.10635	4.10635	2.08664e-16	2.83341e-15
PP_3789		putative Efflux transporter	1007.13	-4.09595	4.09595	3.70217e-50	2.55126e-48
PP_1743	actP-I	acetate permease	1718.6	-4.08393	4.08393	8.40549e-05	0.00033076
PP_1287	alg8	Glycosyltransferase alg8	16.2548	4.07176	4.07176	6.11943e-15	7.39834e-14
PP_0757		conserved protein of unknown function	2.50521	-4.05162	4.05162	0.021895	0.0490081
PP_2360		putative type 1 pili subunit CsuA	415.915	-4.05147	4.05147	5.1269e-28	1.33955e-26
PP_2036		putative 4-hydroxy-tetrahydrodipicolinate synthase	688.595	-4.04137	4.04137	3.59573e-16	4.79982e-15
PP_2628		Uncharacterized ABC transporter ATP-binding	940.865	4.03801	4.03801	1.74707e-152	6.87972e-150
PP_0104	ctaD	Cytochrome c oxidase subunit 1	320.471	-4.02068	4.02068	1.59409e-33	5.49264e-32
PP_3147	potF-II	putrescine-binding periplasmic protein	95.3571	4.01625	4.01625	5.35902e-48	3.31958e-46
PP_0906		putative Multidrug efflux RND transporter	388.41	-3.98447	3.98447	2.47445e-67	2.67483e-65
PP_1286	alg44	Alginate biosynthesis protein Alg44	16.3605	3.97911	3.97911	4.40189e-14	4.93245e-13
PP_3389		conserved membrane protein of unknown function	190.472	-3.97609	3.97609	5.42807e-37	2.2332e-35
PP_2363		conserved protein of unknown function	278.816	-3.97072	3.97072	4.00563e-34	1.42471e-32
PP_4887		conserved protein of unknown function	218.521	-3.96734	3.96734	1.33918e-46	7.68321e-45
PP_2943		putative Cytochrome c551 peroxidase	477.589	-3.96424	3.96424	1.17611e-73	1.50788e-71
PP_0373	yqaE	conserved membrane protein of unknown function	3.87633	-3.95481	3.95481	0.0176848	0.040879
PP_3808		Antibiotic synthesis protein MbtH	61.2103	-3.93642	3.93642	1.40803e-05	6.30584e-05
PP_1357		conserved protein of unknown function	175.06	3.90717	3.90717	4.60092e-50	3.13147e-48
PP_2422		conserved protein of unknown function	953.431	-3.89272	3.89272	1.93732e-48	1.22764e-46
PP_3065	gpD	Pyocin R2_PP, tail formation	4.30379	3.88875	3.88875	2.37655e-05	0.000102519
PP_4855		Osmotically-inducible lipoprotein OsmE	14.7173	3.88751	3.88751	7.27869e-16	9.44175e-15
PP_3016		putative Lipopolysaccharide core biosynthesis	25.8613	3.88664	3.88664	1.42725e-11	1.3114e-10
PP_1106		conserved protein of unknown function	26.4151	3.88192	3.88192	8.45457e-23	1.71993e-21
PP_4793		conserved protein of unknown function	266.583	-3.87608	3.87608	7.7163e-22	1.48223e-20
PP_3743		conserved exported protein of unknown function	42.131	3.8619	3.8619	3.49069e-28	9.20774e-27
PP_1691		conserved protein of unknown function	6.02159	3.84934	3.84934	5.18993e-05	0.000213205
PP_1144		conserved membrane protein of unknown function	934.984	-3.84857	3.84857	4.31395e-36	1.67485e-34
PP_3265	ybhP-I	putative phosphohydrolase of unknown function	5.93601	3.84548	3.84548	2.15257e-05	9.36632e-05
PP_2581		conserved protein of unknown function	20.8767	3.82372	3.82372	3.71247e-14	4.18545e-13
PP_2942		Response regulator	1978.56	-3.8197	3.8197	1.49286e-73	1.87049e-71
PP_0869	yehW	osmoprotectant ABC transporter permease subunit	26.2066	3.81019	3.81019	1.35365e-16	1.85639e-15
PP_2362		putative usher protein	1178.14	-3.79968	3.79968	2.39645e-51	1.73837e-49
PP_0108		conserved protein of unknown function	37.2754	-3.79078	3.79078	2.07131e-07	1.20225e-06
PP_2381		conserved protein of unknown function	453.323	-3.78634	3.78634	2.44417e-09	1.79663e-08
PP_2945		putative sensor histidine kinase	1151.95	-3.77052	3.77052	9.97773e-62	9.48401e-60
PP_0089	osmC	stress-induced peroxiredoxin, lipoyl-dependent	30.6193	3.76062	3.76062	7.39847e-24	1.59952e-22
PP_0870		putative Glycine betaine	86.0957	3.76001	3.76001	1.75763e-49	1.16745e-47
PP_4363		Sensor histidine kinase	1993.29	-3.7583	3.7583	2.33294e-65	2.38176e-63
PP_2958	grx	Glutaredoxin	11.4239	-3.75673	3.75673	0.00197666	0.00590001
PP_0087		conserved exported protein of unknown function	915.055	-3.74911	3.74911	2.49998e-29	7.10433e-28
PP_1101		conserved protein of unknown function	15.2659	3.7414	3.7414	5.68099e-13	5.81063e-12
PP_0105		Cytochrome C oxidase assembly protein	50.504	-3.73548	3.73548	7.18939e-13	7.2725e-12
PP_0905		conserved exported protein of unknown function	426.931	-3.71879	3.71879	5.61497e-35	2.06691e-33
PP_4176		putative 5-oxo-L-prolinase	38.3809	3.71579	3.71579	3.9558e-27	9.6926e-26
PP_0153		hypothetical protein	428.563	-3.71384	3.71384	5.68515e-05	0.000231308
PP_2684		conserved membrane protein of unknown function	10.8554	3.70927	3.70927	5.55853e-11	4.8411e-10
PP_1837		conserved protein of unknown function	4.49093	-3.69082	3.69082	0.0181314	0.0417538
PP_4957		conserved protein of unknown function	20.855	-3.68871	3.68871	3.86176e-07	2.15703e-06
PP_2361		putative chaperone protein	586.31	-3.67543	3.67543	2.90382e-28	7.69653e-27
PP_3449		conserved exported protein of unknown function	71.9448	-3.63952	3.63952	3.04788e-14	3.47168e-13
PP_5190		Type II secretion system protein	29.8119	-3.63892	3.63892	4.22864e-08	2.65821e-07
PP_1188	dctA-I	C4-dicarboxylate transport protein	1678.8	-3.61388	3.61388	6.46361e-09	4.52781e-08
PP_4370	fliE	Flagellar hook-basal body complex protein FliE	210.985	-3.61041	3.61041	8.52756e-32	2.79836e-30
PP_3059		putative tail sheath protein	19.1301	3.60526	3.60526	8.66547e-10	6.70024e-09
PP_0353		Exonuclease	136.713	-3.59906	3.59906	0.000181705	0.000673667
PP_1503		conserved protein of unknown function	99.9399	3.59194	3.59194	3.72424e-44	1.91885e-42
PP_0831		hypothetical protein	68.3996	3.58425	3.58425	7.32065e-52	5.45388e-50
PP_1400	kgtP	Alpha-ketoglutarate permease	466.569	-3.58252	3.58252	6.18771e-19	1.00628e-17
PP_3148		putative Glutamine synthetase	226.243	3.56827	3.56827	3.01822e-79	4.62207e-77
PP_5562		conserved protein of unknown function	174.382	3.55073	3.55073	1.2341e-67	1.38849e-65
PP_1428	mucA	Sigma factor AlgU negative regulatory protein	1039.08	3.54296	3.54296	3.42816e-79	5.10796e-77
PP_3453		putative Sensor protein RstB	174.122	3.53197	3.53197	1.46795e-66	1.55631e-64
PP_1742	yjcH	conserved inner membrane protein of unknown	66.0927	-3.52834	3.52834	0.000172707	0.0006429
PP_4593		conserved protein of unknown function	383.529	-3.51442	3.51442	5.17773e-19	8.47027e-18
PP_3098		conserved protein of unknown function	24.1867	3.50873	3.50873	1.04874e-16	1.45635e-15
PP_0255		conserved exported protein of unknown function	314.327	3.49248	3.49248	3.17553e-47	1.9029e-45
PP_3749		conserved protein of unknown function	28.0671	-3.47469	3.47469	4.8255e-06	2.29931e-05
PP_3161	benA	benzoate 1,2-dioxygenase subunit alpha	165.831	-3.47354	3.47354	2.2983e-20	4.10049e-19
PP_1813		ComEA-related protein	263.327	-3.46603	3.46603	8.47522e-27	2.04929e-25
PP_3061		conserved protein of unknown function	2.59694	3.451	3.451	0.00193792	0.00579694
PP_1502		OmpA family protein	311.753	3.44665	3.44665	2.84013e-57	2.48534e-55
PP_0203		putative dipeptidase	1791.48	-3.42434	3.42434	4.18128e-55	3.24668e-53
PP_5236		conserved protein of unknown function	1021.07	-3.41654	3.41654	1.67045e-78	2.36133e-76
PP_4649		conserved protein of unknown function	12.4639	-3.41511	3.41511	0.00702251	0.0181081
PP_4096		conserved exported protein of unknown function	18.2256	3.408	3.408	3.28304e-12	3.16423e-11
PP_3796	pvdA	L-ornithine 5-monooxygenase	912.745	-3.39433	3.39433	1.03129e-07	6.21369e-07
PP_0101		putative sulfate transporter	63.4638	3.38739	3.38739	5.01512e-23	1.04618e-21
PP_0231	tauC	taurine ABC transporter permease subunit	20.5563	3.37969	3.37969	7.26376e-15	8.70546e-14
PP_1473		conserved protein of unknown function	19.6164	3.35228	3.35228	2.69729e-11	2.41007e-10
PP_4217	fpvA	outer membrane ferripyoverdine receptor FpvA,	4962.86	-3.34862	3.34862	2.22366e-10	1.84346e-09
PP_4312		conserved exported protein of unknown function	51.8466	3.32633	3.32633	1.4681e-27	3.71267e-26
PP_4886		conserved protein of unknown function	433.849	-3.32542	3.32542	6.50824e-61	6.08134e-59
PP_5263		GGDEF domain protein	202.716	3.32447	3.32447	7.22122e-59	6.42106e-57
PP_2170		putative enzyme, chorismate mutase family	451.971	-3.30688	3.30688	1.76888e-47	1.08354e-45
PP_3790		diaminopimelate epimerase	1136.45	-3.29802	3.29802	5.46804e-56	4.36888e-54
PP_1278	algF	Alginate biosynthesis protein AlgF	30.8472	3.29801	3.29801	8.56147e-14	9.34641e-13
PP_4978		conserved protein of unknown function	194.138	3.29407	3.29407	2.23124e-67	2.46016e-65
PP_2504		putative tautomerase K2	9.46166	-3.28817	3.28817	0.00045593	0.00155253
PP_0773	yiaD	OmpA	731.936	3.27542	3.27542	8.08156e-155	3.4272e-152
PP_1283	algG	poly(beta-D-mannuronate) C5 epimerase	32.7287	3.27348	3.27348	5.20773e-21	9.60207e-20
PP_3195		conserved protein of unknown function	19.4191	3.23736	3.23736	4.67821e-12	4.4621e-11
PP_2159		Copper-binding protein, plastocyanin	92.0784	3.23376	3.23376	1.80996e-34	6.52177e-33
PP_0103		cytochrome c oxidase subunit 2	445.229	-3.22803	3.22803	1.5861e-26	3.80181e-25
PP_0150		conserved exported protein of unknown function	24.4505	3.22104	3.22104	2.92291e-10	2.3908e-09
PP_1285	algK	Alginate biosynthesis protein AlgK	22.4124	3.2065	3.2065	3.32615e-17	4.72605e-16
PP_5588		conserved protein of unknown function	11.6794	-3.2056	3.2056	4.46107e-05	0.000185055
PP_3725		putative Acyl-CoA dehydrogenase	98.6274	3.19889	3.19889	1.09503e-06	5.80469e-06
PP_0069		putative Rossmann fold nucleotide-binding	78.8366	-3.19771	3.19771	5.51666e-17	7.73877e-16
PP_1280	algI	Probable alginate O-acetylase AlgI	18.9816	3.18799	3.18799	2.48415e-11	2.23047e-10
PP_0788		conserved protein of unknown function	189.75	3.18486	3.18486	6.87529e-59	6.21369e-57
PP_1811	rffE	UDP-N-acetylglucosamine-2-epimerase	200.112	-3.17111	3.17111	1.36118e-30	4.21583e-29
PP_3824		conserved exported protein of unknown function	30.6091	3.16859	3.16859	3.69585e-16	4.92156e-15
PP_0868	yehX	ABC transporter ATP-binding subunit	223.302	3.16534	3.16534	1.27746e-83	2.27182e-81
PP_0536		conserved protein of unknown function	222.664	-3.12361	3.12361	8.6213e-18	1.28457e-16
PP_3454		putative transcriptional regulatory protein	129.47	3.12229	3.12229	1.35184e-46	7.68321e-45
PP_2462		conserved protein of unknown function	146.623	3.11719	3.11719	1.10754e-36	4.45683e-35
PP_3099	puuD	uricase	578.696	3.10701	3.10701	4.80899e-41	2.22789e-39
PP_5542		protein of unknown function	8.28761	3.10478	3.10478	1.39607e-07	8.24926e-07
PP_5082	pilN	Type IV pili biogenesis protein PilN	24.1561	-3.10311	3.10311	3.93484e-06	1.91632e-05
PP_0354		CBS domain protein	1330.39	-3.10157	3.10157	0.00111055	0.00350456
PP_1427	rpoE	RNA polymerase sigma E factor	998.331	3.09064	3.09064	6.51856e-165	3.99298e-162
PP_2579	yijP	putative phosphoethanolamine transferase CptA	49.1113	3.08208	3.08208	3.82413e-27	9.41179e-26
PP_0080		conserved protein of unknown function	22.6569	3.07843	3.07843	2.23561e-14	2.58927e-13
PP_2874		conserved protein of unknown function	563.524	-3.07647	3.07647	2.97062e-15	3.73053e-14
PP_1762		conserved protein of unknown function	1490.98	-3.07445	3.07445	4.6397e-56	3.76157e-54
PP_1154		Sensory box protein	413.192	-3.07111	3.07111	2.35924e-49	1.53018e-47
PP_4053	treY	maltooligosyl trehalose synthase	2105.42	-3.0671	3.0671	1.49449e-33	5.18185e-32
PP_3203		Major facilitator family transporter	3.43165	3.06206	3.06206	0.00858429	0.0216195
PP_4054		conserved protein of unknown function	268.502	-3.05913	3.05913	5.21227e-25	1.1681e-23
PP_3380	ptxS	2-ketogluconate utilization repressor	1888.56	-3.05524	3.05524	1.10899e-31	3.61767e-30
PP_0149		conserved exported protein of unknown function	154.484	3.04921	3.04921	2.42739e-31	7.78034e-30
PP_0828		conserved membrane protein of unknown function	25.2826	3.048	3.048	9.17919e-13	9.18418e-12
PP_0168		putative surface adhesion protein	187936	-3.04447	3.04447	1.22816e-41	5.83693e-40
PP_4211	ompQ	outer membrane pyoverdine efflux protein	84.7372	-3.04147	3.04147	3.96388e-07	2.21183e-06
PP_5363		conserved exported protein of unknown function	61.671	3.0319	3.0319	3.34789e-27	8.31394e-26
PP_2572		conserved protein of unknown function	207.568	-3.03173	3.03173	7.40419e-17	1.0334e-15
PP_5645		conserved protein of unknown function	80.7072	-3.01313	3.01313	3.62252e-13	3.77522e-12
PP_5613		protein of unknown function	146.137	-3.0036	3.0036	1.63017e-26	3.89054e-25
PP_3093		conserved protein of unknown function	198.401	2.99893	2.99893	4.71418e-49	3.02201e-47
PP_1364		conserved exported protein of unknown function	923.868	-2.99875	2.99875	3.28724e-30	9.95745e-29
PP_1354	mdfA	putative multidrug efflux MFS transporter	104.273	2.99106	2.99106	1.49885e-36	5.94474e-35
PP_3233	fnrB	transcriptional regulator with 4Fe-4S cluster,	33.9209	-2.9819	2.9819	3.27218e-08	2.09675e-07
PP_3049		conserved protein of unknown function	9.30447	2.97905	2.97905	2.09666e-05	9.13791e-05
PP_3800		conserved protein of unknown function	63.3092	-2.97726	2.97726	0.000103251	0.000400602
PP_2914	proP	osmosensory proline	92.7372	2.97625	2.97625	4.38931e-53	3.31483e-51
PP_3163	benC	benzoate 1,2-dioxygenase electron transfer	43.5788	-2.97599	2.97599	6.15943e-09	4.32572e-08
PP_0574		DNA-binding response regulator, LuxR family	2939.47	-2.975	2.975	5.73598e-79	8.3217e-77
PP_5600		conserved protein of unknown function	9.37274	2.97443	2.97443	0.000258077	0.000925684
PP_5421		conserved protein of unknown function	16.8658	2.96919	2.96919	1.88644e-11	1.71616e-10
PP_5451		protein of unknown function	519.963	-2.9629	2.9629	3.7329e-19	6.14312e-18
PP_1282	algX	Alginate biosynthesis protein AlgX	19.3999	2.95691	2.95691	1.76949e-14	2.07117e-13
PP_3095	clpV	Protein ClpV1	414.465	2.95427	2.95427	5.0307e-57	4.26681e-55
PP_3094		conserved exported protein of unknown function	55.1071	2.93589	2.93589	1.50185e-18	2.36563e-17
PP_1849		conserved protein of unknown function	736.432	-2.92963	2.92963	5.16315e-34	1.82465e-32
PP_1447		conserved protein of unknown function	31.2861	-2.92931	2.92931	6.97134e-05	0.000279712
PP_4421		putative aminotransferase	2174.95	-2.92687	2.92687	3.19049e-16	4.29004e-15
PP_0871		putative Glycine betaine	118.529	2.92667	2.92667	4.47628e-43	2.20337e-41
PP_3562		conserved exported protein of unknown function	58.7353	2.92197	2.92197	2.34505e-27	5.87648e-26
PP_3232		Acetyltransferase, GNAT family	1868.88	-2.91455	2.91455	8.53589e-26	1.994e-24
PP_1650	gacS	Sensor protein GacS	498.411	-2.91244	2.91244	3.21509e-51	2.27241e-49
PP_2573		conserved protein of unknown function	50.7776	-2.9057	2.9057	5.2262e-10	4.17566e-09
PP_3448	nfrB	bacteriophage N4 receptor, inner membrane	511.06	-2.90542	2.90542	1.64171e-44	8.78714e-43
PP_5340	aphA	Acetylpolyamine aminohydrolase	74.9017	2.9039	2.9039	4.83785e-22	9.39123e-21
PP_4052	malQ	4-alpha-glucanotransferase	1682.6	-2.89592	2.89592	8.67255e-21	1.58843e-19
PP_0333		conserved exported protein of unknown function	167.118	2.89281	2.89281	3.62016e-27	8.94976e-26
PP_5607		conserved membrane protein of unknown function	76.1239	-2.88994	2.88994	2.99065e-14	3.42063e-13
PP_3402		conserved protein of unknown function	219.634	-2.8799	2.8799	4.38762e-13	4.53826e-12
PP_0106		cytochrome c oxidase subunit 3	148.485	-2.86938	2.86938	1.14645e-13	1.23929e-12
PP_2526	cigR	conserved membrane protein of unknown function	575.246	-2.86226	2.86226	2.6411e-29	7.46687e-28
PP_1640	yohC	putative inner membrane protein of unknown	189.832	-2.8511	2.8511	1.63847e-19	2.76235e-18
PP_3054	gpJ	Pyocin R2_PP, baseplate	14.6133	2.85035	2.85035	2.1717e-08	1.42871e-07
PP_4637		5-methyltetrahydropteroyltriglutamate-	460.76	2.85007	2.85007	8.24348e-15	9.83686e-14
PP_4685		conserved protein of unknown function	110.458	-2.83887	2.83887	1.01273e-12	1.01145e-11
PP_3060		putative tail sheath protein	4.05434	2.83754	2.83754	0.00131076	0.00407801
PP_4216	pvdE	pyoverdine ABC export system, fused ATPase and	360.825	-2.83182	2.83182	1.25386e-10	1.04894e-09
PP_0202		CBS domain-containing protein	509.298	-2.83007	2.83007	2.82258e-37	1.16999e-35
PP_5725		protein of unknown function	17.7861	-2.82709	2.82709	1.80561e-06	9.19994e-06
PP_1185	oprH	Outer membrane protein H1	6411.82	2.82519	2.82519	2.13143e-22	4.28852e-21
PP_3450		conserved protein of unknown function containing	64.5348	-2.81793	2.81793	2.21912e-12	2.17301e-11
PP_5288	algC	Phosphomannomutase	881.7	2.81759	2.81759	9.70384e-76	1.33743e-73
PP_0109		conserved membrane protein of unknown function	82.7535	-2.809	2.809	1.01668e-11	9.45183e-11
PP_4362		conserved protein of unknown function	175.445	-2.79915	2.79915	3.27005e-19	5.41375e-18
PP_4243	pvdL	non-ribosomal peptide synthase (subunit of	2736.32	-2.79889	2.79889	1.50387e-15	1.92363e-14
PP_4504		conserved exported protein of unknown function	80.0352	2.79576	2.79576	1.19578e-16	1.65637e-15
PP_3877		conserved protein of unknown function	24.0612	2.79471	2.79471	5.52437e-10	4.40114e-09
PP_4521		putative aerotaxis receptor	1230.4	-2.78937	2.78937	1.0635e-40	4.84552e-39
PP_3611		conserved exported protein of unknown function	667.367	-2.78806	2.78806	8.57569e-31	2.68624e-29
PP_5447		conserved membrane protein of unknown function	38.6034	-2.78563	2.78563	4.55308e-08	2.84917e-07
PP_3100		conserved protein of unknown function	253.83	2.78241	2.78241	2.79609e-51	2.00193e-49
PP_1186	phoP	two component system DNA-binding transcriptional	1107.55	2.78053	2.78053	1.20189e-88	2.28483e-86
PP_1269		Universal stress protein family	19.9918	-2.77853	2.77853	9.20874e-05	0.000360567
PP_2351	prpE	propionyl-CoA synthetase	482.425	-2.77065	2.77065	0.0026061	0.00757378
PP_5429		protein of unknown function	9.3655	-2.74379	2.74379	0.0017052	0.00518235
PP_3517		conserved exported protein of unknown function	105.269	-2.74176	2.74176	3.05837e-14	3.47646e-13
PP_0554	acoB	Acetoin:2,6-dichlorophenolindophenol	6.92622	2.74129	2.74129	7.51086e-05	0.000298324
PP_3289		Acetyltransferase, GNAT family	439.709	-2.73823	2.73823	3.1156e-24	6.87052e-23
PP_0608		putative type 4 fimbrial biogenesis protein	8.41414	-2.72962	2.72962	0.00166111	0.00506231
PP_4221	pvdI	non-ribosomal peptide synthetase (subunit of	1695.35	-2.72292	2.72292	1.02775e-13	1.11316e-12
PP_4449		conserved protein of unknown function	10.4755	-2.69805	2.69805	0.00187531	0.00563717
PP_5382		putative exported protein	50.8083	2.69495	2.69495	3.84381e-22	7.54126e-21
PP_3726		Enoyl-CoA hydratase	40.2947	2.69404	2.69404	1.77412e-05	7.79962e-05
PP_2292		conserved protein of unknown function	3218.94	-2.69232	2.69232	1.59305e-75	2.14207e-73
PP_4406		conserved protein of unknown function	405.29	-2.69117	2.69117	2.98198e-21	5.55394e-20
PP_5561		conserved protein of unknown function	38.3299	2.68839	2.68839	2.63615e-11	2.35927e-10
PP_3140		Glycosyl transferase, group 2 family protein	693.472	-2.68551	2.68551	1.98024e-20	3.57937e-19
PP_2377		putative acetyltransferase Act	26.0075	2.6834	2.6834	2.93425e-08	1.89865e-07
PP_3097		conserved protein of unknown function	261.402	2.68282	2.68282	2.44839e-30	7.45746e-29
PP_4051	treZ	malto-oligosyltrehalose trehalohydrolase	1649.07	-2.68056	2.68056	2.44784e-34	8.76294e-33
PP_0482	bfr-I	bacterioferritin	2457.1	-2.67688	2.67688	1.20326e-25	2.77555e-24
PP_3261		conserved protein of unknown function	2.92016	2.668	2.668	0.0182024	0.0418821
PP_1277	algA	mannose-6-phosphate	194.297	2.66187	2.66187	5.9021e-23	1.21411e-21
PP_2075		conserved membrane protein of unknown function	57.7474	-2.66037	2.66037	1.25135e-11	1.15363e-10
PP_4032		putative Outer membrane lipoprotein Blc	66.9362	2.65792	2.65792	2.00763e-27	5.05391e-26
PP_3832		carbon storage regulator (csrA-like)	170.865	-2.65735	2.65735	7.87917e-12	7.34989e-11
PP_3092		conserved protein of unknown function	63.9361	2.65554	2.65554	4.52134e-28	1.18696e-26
PP_4050	glgA	glycogen synthase	3416.6	-2.65245	2.65245	2.74798e-29	7.69015e-28
PP_4213	pvdM	putative dipeptidase	360.985	-2.65193	2.65193	0.000115142	0.000443901
PP_0711	ycaC-I	putative hydrolase	592.629	-2.65166	2.65166	1.29187e-33	4.50763e-32
PP_4556		conserved protein of unknown function	38.9073	-2.64886	2.64886	8.62298e-06	3.98479e-05
PP_0115	katE	hydroperoxidase - self catalytic heme d	161.009	2.6477	2.6477	7.72777e-37	3.13259e-35
PP_4222		putative SyrP protein	583.247	-2.6379	2.6379	2.28697e-07	1.31471e-06
PP_1279	algJ	Probable alginate O-acetylase AlgJ	19.3019	2.63769	2.63769	3.72659e-11	3.30833e-10
PP_2578		conserved exported protein of unknown function	34.0702	-2.6362	2.6362	8.98422e-07	4.80407e-06
PP_3382		gluconate 2-dehydrogenase cytochrome c subunit	755.313	-2.63133	2.63133	3.48087e-44	1.81038e-42
PP_2853		conserved exported protein of unknown function	1906.9	-2.62891	2.62891	1.74524e-35	6.50101e-34
PP_3165	benK	benzoate MFS transporter	21.7017	-2.62477	2.62477	1.45207e-06	7.52372e-06
PP_4361	fliK	Flagellar hook-length control protein FliK	923.815	-2.62068	2.62068	2.14581e-40	9.54019e-39
PP_3384		gluconate 2-dehydrogenase gamma subunit	522.162	-2.61999	2.61999	1.24203e-39	5.47783e-38
PP_2558		putative Outer membrane efflux protein	80.2561	-2.61868	2.61868	2.29054e-13	2.42841e-12
PP_0107		conserved protein of unknown function	48.1547	-2.61199	2.61199	8.61321e-11	7.37339e-10
PP_3614		conserved membrane protein of unknown function	6.03804	2.61175	2.61175	0.000227331	0.0008267
PP_4214	pvdN	pyoverdine biosynthesis related protein	240.813	-2.60734	2.60734	3.16291e-08	2.03467e-07
PP_4885		conserved protein of unknown function	712.928	-2.59807	2.59807	1.13426e-36	4.53128e-35
PP_0765		conserved exported protein of unknown function	9204.98	-2.59804	2.59804	2.22557e-19	3.71805e-18
PP_4617	ldh	leucine dehydrogenase	439.053	-2.59598	2.59598	2.56253e-21	4.80518e-20
PP_5165	plpB	NLPA lipoprotein	481.858	2.59331	2.59331	2.39426e-44	1.2571e-42
PP_0278		conserved protein of unknown function	8.42614	-2.58391	2.58391	0.00206318	0.00612179
PP_4223	pvdH	diaminobutyrate-2-oxoglutarate transaminase	857.101	-2.58053	2.58053	1.23135e-06	6.4837e-06
PP_2563		putative Antibiotic biosynthesis protein	828.872	-2.57774	2.57774	1.66285e-35	6.23626e-34
PP_1562		putative Phage terminase, small subunit	22.7636	2.57453	2.57453	0.000274688	0.000980801
PP_3047		conserved protein of unknown function	25.7896	2.57331	2.57331	3.6832e-12	3.53529e-11
PP_1122		OmpA family protein	595.94	-2.56809	2.56809	9.79372e-23	1.98503e-21
PP_5568		conserved membrane protein of unknown function	39.2038	2.56675	2.56675	2.53981e-15	3.19679e-14
PP_3692		conserved protein of unknown function	8178.21	-2.56116	2.56116	1.65027e-34	5.98549e-33
PP_2941		conserved protein of unknown function	397.02	-2.54507	2.54507	1.06567e-27	2.72798e-26
PP_3984		putative transposase	88.842	-2.53615	2.53615	1.28318e-07	7.60664e-07
PP_3166	catA-II	catechol 1,2-dioxygenase	30.4394	-2.53284	2.53284	1.2804e-08	8.67178e-08
PP_4920		putative Lipoprotein	313.439	2.53188	2.53188	6.46161e-43	3.15246e-41
PP_2707		putative Exodeoxyribonuclease III	10.6433	2.53102	2.53102	2.05595e-06	1.03795e-05
PP_0610		conserved exported protein of unknown function	6.84013	-2.52452	2.52452	0.00758896	0.0193874
PP_3139		Glycosyl transferase, group 1 family protein	820.492	-2.52014	2.52014	1.94307e-39	8.43476e-38
PP_5685		protein of unknown function	10.1287	-2.51856	2.51856	0.00176462	0.00533939
PP_0679		conserved exported protein of unknown function	16488.8	-2.51835	2.51835	8.7782e-33	2.96897e-31
PP_2559	hasE	Metalloprotease secretion protein	60.5001	-2.51124	2.51124	6.19263e-12	5.82593e-11
PP_2078	lysR	transcriptional activator protein LysR	18.9628	2.50785	2.50785	1.2559e-08	8.51636e-08
PP_2918	treSA	trehalose synthase A	115.954	2.50618	2.50618	8.99202e-26	2.09169e-24
PP_0200	nfeD	putative membrane bound peptidase, nefD	39.9772	-2.50493	2.50493	1.49535e-06	7.73345e-06
PP_2505		GAF domain	835.59	-2.50205	2.50205	1.36225e-29	3.97358e-28
PP_1187	phoQ	sensor protein	349.793	2.5013	2.5013	1.12668e-34	4.11348e-33
PP_3383		gluconate 2-dehydrogenase flavoprotein subunit	2707.99	-2.49623	2.49623	5.62373e-35	2.06691e-33
PP_5007		Polyhydroxyalkanoate granule-associated protein	4481.59	-2.49342	2.49342	9.83916e-36	3.74092e-34
PP_2598		conserved protein of unknown function	11.7093	-2.49047	2.49047	0.00132023	0.00410515
PP_0618		Branched-chain amino acid ABC transporter,	12.5749	2.48534	2.48534	0.0014849	0.00457333
PP_3569	quiA	quinate dehydrogenase (quinone)	1036.88	-2.48371	2.48371	5.2089e-29	1.43583e-27
PP_0651		Acetyltransferase, GNAT family	65.3914	-2.47675	2.47675	2.40047e-12	2.34226e-11
PP_1121		OmpA family protein	2208.51	-2.47568	2.47568	7.72278e-19	1.24127e-17
PP_0148		conserved protein of unknown function	106.938	-2.47563	2.47563	1.95814e-09	1.45292e-08
PP_2996		conserved protein of unknown function	47.5296	-2.47246	2.47246	5.13855e-11	4.48952e-10
PP_3088		conserved protein of unknown function	182.922	2.46808	2.46808	1.77018e-38	7.50693e-37
PP_1300	yhdZ	putative amino acid ABC transporter -	85.8769	2.46703	2.46703	7.01957e-14	7.73978e-13
PP_2569		Metabolite MFS transporter, MHS family	194.038	-2.46373	2.46373	6.73249e-16	8.75382e-15
PP_3637		putative Sulfonate ABC transporter, ATP-binding	284.083	-2.46136	2.46136	5.58013e-30	1.66288e-28
PP_3798		conserved protein of unknown function	63.7524	-2.46043	2.46043	7.94085e-05	0.000314045
PP_3241		conserved exported protein of unknown function	16.4914	2.45493	2.45493	1.40059e-06	7.29127e-06
PP_3764	opdN	outer-membrane porin D	211.029	-2.45154	2.45154	0.000134275	0.000510985
PP_4220	pvdJ	non-ribosomal peptide synthetase (subunit of	2434.86	-2.44899	2.44899	1.13388e-12	1.12632e-11
PP_3134		conserved protein of unknown function	1295.1	-2.43456	2.43456	6.16378e-31	1.95293e-29
PP_3057		putative pectinesterase	22.6331	2.43298	2.43298	3.97995e-12	3.80928e-11
PP_3580		conserved protein of unknown function	146.214	-2.43115	2.43115	5.24395e-11	4.57435e-10
PP_3807		Thioesterase	218.116	-2.43091	2.43091	6.49133e-10	5.10475e-09
PP_3062		putative Pyocin R2_PP, tail length determination	72.9048	2.41577	2.41577	8.0976e-20	1.40827e-18
PP_4270		conserved exported protein of unknown function	226.265	-2.41355	2.41355	1.29985e-25	2.98587e-24
PP_4650	cioB	Ubiquinol oxidase subunit II, cyanide	1407.48	-2.40922	2.40922	9.09897e-16	1.17753e-14
PP_4137		putative Outer membrane siderophore receptor	76.9181	2.40914	2.40914	7.22449e-20	1.2604e-18
PP_0617		Branched-chain amino acid ABC transporter,	16.2587	2.40873	2.40873	0.0012423	0.00389358
PP_3683		conserved protein of unknown function	316.51	-2.40733	2.40733	1.95949e-30	6.00149e-29
PP_0575		conserved membrane protein of unknown function	137.412	-2.40609	2.40609	4.67571e-21	8.65006e-20
PP_1633		conserved exported protein of unknown function	120.665	2.40572	2.40572	4.13454e-31	1.31755e-29
PP_1429	mucB	Sigma factor AlgU regulatory protein MucB	1563.08	2.40437	2.40437	3.1585e-46	1.77682e-44
PP_3135		putative Glycosyl transferase	1108.99	-2.39765	2.39765	6.13406e-28	1.59515e-26
PP_3598		Peptidase C26	109.907	2.39604	2.39604	4.79708e-30	1.4373e-28
PP_3091		conserved membrane protein of unknown function	434.816	2.38964	2.38964	1.57973e-51	1.16121e-49
PP_2560	aprDA	alkaline protease secretion transporter	78.9459	-2.38676	2.38676	4.83477e-13	4.98207e-12
PP_4576	ybgJ	allophanate hydrolase subunit	1294.24	-2.38487	2.38487	2.6594e-12	2.59033e-11
PP_0173		putative transcriptional factor-related protein	1805.48	-2.38137	2.38137	1.97336e-42	9.54309e-41
PP_4555		conserved protein of unknown function	70.2903	-2.37631	2.37631	3.25847e-08	2.09126e-07
PP_0110		CyoE like protoheme IX farnesyltransferase	25.0644	-2.36814	2.36814	2.18307e-06	1.09911e-05
PP_5738		conserved protein of unknown function	1122.59	-2.36796	2.36796	7.98393e-44	4.0014e-42
PP_2925	mqo-III	malate:quinone oxidoreductase	467.538	-2.36288	2.36288	6.61112e-27	1.6056e-25
PP_4415		conserved protein of unknown function	874.408	-2.35656	2.35656	1.90416e-23	4.03755e-22
PP_0573		conserved protein of unknown function	257.463	-2.34942	2.34942	3.43541e-21	6.37691e-20
PP_3081		conserved protein of unknown function	59.8698	-2.34794	2.34794	6.31396e-11	5.49036e-10
PP_3146		putative Oxidoreductase	66.1829	2.34546	2.34546	3.43278e-15	4.28165e-14
PP_3180		Smp-30	718.973	-2.34101	2.34101	4.01557e-20	7.09546e-19
PP_0649		MutT	56.2354	-2.33934	2.33934	6.5642e-11	5.69001e-10
PP_5683		conserved protein of unknown function	18.1868	-2.33412	2.33412	8.64338e-05	0.000339636
PP_1467		NhaP-type Na+(K+)	196.262	-2.32926	2.32926	1.56119e-17	2.27094e-16
PP_5129		conserved protein of unknown function	1344.67	-2.3286	2.3286	4.4477e-44	2.27039e-42
PP_3690		conserved protein of unknown function	619.773	-2.32624	2.32624	2.75503e-39	1.1866e-37
PP_3668	katG	Catalase-peroxidase	6558.04	-2.32314	2.32314	3.45554e-14	3.91984e-13
PP_5169	cysW	sulfate ABC transporter, inner membrane subunit	182.756	2.3199	2.3199	1.61328e-32	5.3903e-31
PP_2771		Sigma-54 dependent transcriptional regulator	51.0748	2.31838	2.31838	1.45023e-12	1.43025e-11
PP_0355		Response regulator	41.7408	2.31823	2.31823	7.03931e-09	4.91859e-08
PP_2745		Universal stress protein family	461.594	-2.3173	2.3173	1.31219e-19	2.22588e-18
PP_0654	mdh	putative malate dehydrogenase	320.461	-2.31063	2.31063	6.1683e-24	1.33881e-22
PP_0713	kefB-I	Kef-type potassium	157.854	-2.30941	2.30941	6.86765e-20	1.20195e-18
PP_3636		putative Sulfonate ABC transporter, periplasmic	649.861	-2.30135	2.30135	1.58945e-25	3.62093e-24
PP_4888		putative methyl-accepting chemotaxis transducer	96.3818	2.30025	2.30025	3.34891e-11	2.98747e-10
PP_2699		conserved protein of unknown function	186.034	2.29338	2.29338	1.44444e-08	9.72311e-08
PP_2326		Universal stress protein	228.704	-2.28962	2.28962	4.36325e-13	4.52154e-12
PP_3638		putative Acyl-CoA dehydrogenase	658.587	-2.28939	2.28939	3.69338e-26	8.73888e-25
PP_5269	dadX	alanine racemase, PLP-binding	78.4833	2.28764	2.28764	2.44302e-08	1.60147e-07
PP_5665		putative microcin B17-like protein, McbA family	21.4947	-2.27839	2.27839	7.13422e-06	3.34163e-05
PP_0609		conserved exported protein of unknown function	13.2515	-2.27733	2.27733	0.000840364	0.00271885
PP_5171	sbp-II	sulfate ABC transporter	979.025	2.27489	2.27489	3.57893e-30	1.07818e-28
PP_4561	csbD	stress response protein	14.1122	2.27146	2.27146	0.000685831	0.00225731
PP_3875		conserved protein of unknown function	5.87908	2.26834	2.26834	0.0136313	0.0325182
PP_1299	yhdY	putative amino acid ABC transporter - membrane	59.1282	2.26828	2.26828	2.28906e-11	2.06203e-10
PP_2118		conserved protein of unknown function	30.6265	-2.26766	2.26766	0.00330902	0.00938406
PP_3418		conserved protein of unknown function	80.2577	2.26419	2.26419	2.19884e-06	1.10604e-05
PP_3791		Site-specific recombinase, phage integrase	69.0157	-2.25914	2.25914	2.94292e-14	3.37304e-13
PP_4021	cpo	non-heme chloroperoxidase	932.584	-2.2576	2.2576	1.26858e-13	1.36595e-12
PP_5323		Peptidase, M23	284.465	-2.25746	2.25746	5.93485e-14	6.60986e-13
PP_4651	cioA	Ubiquinol oxidase subunit I, cyanide	2164.9	-2.25612	2.25612	1.96343e-13	2.09775e-12
PP_5176		conserved protein of unknown function	11.7174	-2.25348	2.25348	0.000495713	0.00166943
PP_2412		ParA family protein	71.2662	-2.25253	2.25253	1.32951e-09	1.00543e-08
PP_5170	cysU	sulfate ABC transporter, inner membrane subunit	128.173	2.25229	2.25229	7.02161e-18	1.05477e-16
PP_3536		conserved protein of unknown function	354.176	-2.25135	2.25135	2.22372e-20	3.98031e-19
PP_0232	tauB-II	ATP-binding taurine transporter subunit	26.7144	2.25074	2.25074	7.34913e-09	5.11563e-08
PP_1663		conserved exported protein of unknown function	753.714	2.24781	2.24781	4.63722e-64	4.56518e-62
PP_4465		putative Porin	38.0906	2.24645	2.24645	1.56318e-09	1.1709e-08
PP_1840		conserved protein of unknown function	208.282	-2.24523	2.24523	6.45996e-10	5.08768e-09
PP_4055	glgX	Glycogen debranching enzyme	2449.3	-2.24459	2.24459	2.05273e-17	2.96249e-16
PP_4215	pvdO	pyoverdine biosynthesis related protein	135.24	-2.24315	2.24315	9.18023e-06	4.22812e-05
PP_5695		conserved protein of unknown function	44.7045	-2.24237	2.24237	3.18083e-09	2.29829e-08
PP_5247		conserved protein of unknown function	98.5176	-2.23944	2.23944	3.7816e-13	3.92617e-12
PP_3831		conserved protein of unknown function	19.3444	2.23679	2.23679	6.41997e-10	5.06988e-09
PP_4519	tolC	Agglutination protein	6846.42	-2.2363	2.2363	4.62823e-29	1.28218e-27
PP_3136		putative O-acetyltransferase	196.875	-2.23546	2.23546	5.22655e-17	7.3505e-16
PP_5319		conserved exported protein of unknown function	2835.87	-2.23034	2.23034	4.66055e-24	1.01556e-22
PP_1970		putative Lipoprotein	79.9394	-2.23033	2.23033	5.74452e-13	5.86473e-12
PP_1649	ldhA	D-lactate dehydrogenase	174.529	-2.22991	2.22991	7.18546e-19	1.15829e-17
PP_5353		conserved exported protein of unknown function	797.432	2.22788	2.22788	1.06883e-27	2.72798e-26
PP_3141		Glycosyl transferase, WecB	200.786	-2.22648	2.22648	2.71575e-17	3.87874e-16
PP_3096		conserved protein of unknown function	68.2919	2.22513	2.22513	6.52758e-18	9.88641e-17
PP_4209	pvdR	ABC export system, membrane fusion protein	94.5353	-2.2243	2.2243	7.29754e-06	3.40944e-05
PP_1105		putative DNA ligase, ATP-dependent	31.2569	2.22124	2.22124	2.53038e-09	1.85752e-08
PP_2741		conserved membrane protein of unknown function	239.038	-2.22114	2.22114	1.58833e-18	2.48763e-17
PP_0945		conserved protein of unknown function	53.7628	-2.22108	2.22108	0.000117506	0.000451752
PP_3050		conserved protein of unknown function	10.8685	2.21004	2.21004	7.79523e-06	3.62048e-05
PP_4974	nhaP	NhaP-type Na+	146.37	2.2081	2.2081	1.01758e-25	2.35711e-24
PP_0201		conserved protein of unknown function	524.518	-2.20741	2.20741	4.99846e-15	6.12367e-14
PP_1353		conserved membrane protein of unknown function	666.221	2.20713	2.20713	1.70006e-45	9.46709e-44
PP_1412		3-hydroxyisobutyryl-CoA hydrolase	471.972	-2.20581	2.20581	6.61354e-19	1.06922e-17
PP_4986		Channel protein, hemolysin III family	53.7326	2.20215	2.20215	4.81623e-18	7.33477e-17
PP_4968	ligB	DNA ligase B	38.9355	-2.20207	2.20207	1.59523e-07	9.35586e-07
PP_1833		conserved protein of unknown function	60.4525	-2.1983	2.1983	3.6968e-05	0.000155221
PP_5516		protein of unknown function	693.032	-2.18575	2.18575	2.01871e-17	2.92104e-16
PP_5661		putative lipoprotein	516.808	2.18103	2.18103	4.16443e-09	2.96622e-08
PP_0361		putative Competence protein ComF	41.9489	-2.18038	2.18038	4.47417e-07	2.4865e-06
PP_3724		putative Acyl-CoA synthetase	136.742	2.17884	2.17884	2.02598e-09	1.49935e-08
PP_4371	atoC	two component system AtoC DNA-binding	356.002	-2.17458	2.17458	5.33145e-23	1.10497e-21
PP_3799		conserved exported protein of unknown function	51.8078	-2.17298	2.17298	0.000657659	0.00217628
PP_4418		conserved protein of unknown function	48.2745	-2.16099	2.16099	1.66341e-10	1.38316e-09
PP_3355		Beta-ketothiolase	11.3759	2.16068	2.16068	7.04758e-05	0.000281546
PP_2577		putative paraquat-inducible protein B (pqiB	208.331	-2.14458	2.14458	7.79041e-17	1.08456e-15
PP_4626	cidA	holin regulator of murein hydrolases	14.6639	-2.1417	2.1417	0.0118806	0.0287903
PP_5151		conserved exported protein of unknown function	94.9133	2.14109	2.14109	1.5257e-18	2.39635e-17
PP_3963		conserved protein of unknown function	279.246	2.14082	2.14082	6.85729e-18	1.03573e-16
PP_0056	betA-I	choline dehydrogenase	120.249	2.14052	2.14052	8.06412e-08	4.92877e-07
PP_3691		DNA helicase-related protein	9517.06	-2.13833	2.13833	8.66623e-22	1.65318e-20
PP_4386	flgF	flagellar basal-body rod protein FlgF	1001.36	-2.12871	2.12871	8.23846e-20	1.42826e-18
PP_0903		conserved protein of unknown function	172.302	2.12566	2.12566	8.05539e-14	8.84649e-13
PP_3904		conserved protein of unknown function	1286.55	-2.1171	2.1171	1.82622e-08	1.21155e-07
PP_4391	flgB	flagellar basal-body rod protein FlgB	236.872	-2.1132	2.1132	2.25203e-28	5.99779e-27
PP_0766		conserved exported protein of unknown function	6700.02	-2.11212	2.11212	2.18743e-13	2.33255e-12
PP_4863	livF-II	high-affinity branched-chain amino acid	236.16	2.10312	2.10312	1.54672e-13	1.65574e-12
PP_0136		conserved exported protein of unknown function	51.6694	2.10245	2.10245	1.31202e-16	1.80829e-15
PP_2851		conserved protein of unknown function	56.6622	-2.10145	2.10145	7.90496e-06	3.66527e-05
PP_5596		conserved protein of unknown function	19.8483	2.10022	2.10022	4.96101e-07	2.74323e-06
PP_5502	rmf	ribosome modulation factor	1413.79	-2.09946	2.09946	1.41583e-05	6.32534e-05
PP_5677		conserved protein of unknown function	6.26904	-2.0986	2.0986	0.0164771	0.038442
PP_4257	ccoQ-II	cytochrome c oxidase subunit, cbb3-type	12.3893	-2.09792	2.09792	0.00192781	0.00576984
PP_2241		putative major facilitator family transporter	91.106	-2.09582	2.09582	2.486e-13	2.62554e-12
PP_1192		Acetyltransferase, GNAT family	112.933	-2.09395	2.09395	4.40311e-15	5.44268e-14
PP_3090		OmpA domain protein	224.214	2.09323	2.09323	3.70541e-39	1.58356e-37
PP_5081		Type IV pili biogenesis protein	125.434	-2.09177	2.09177	1.88248e-23	4.007e-22
PP_3264	clsB	cardiolipin synthase 2	20.2913	2.09101	2.09101	1.76124e-08	1.17126e-07
PP_4817		MaoC domain protein	293.716	-2.09056	2.09056	4.93363e-16	6.46059e-15
PP_3044		Phage portal protein, lambda family	28.7107	2.09044	2.09044	2.6468e-10	2.17789e-09
PP_0425	yhfA	conserved protein of unknown function	143.967	2.08925	2.08925	3.79518e-24	8.30271e-23
PP_0365	bioC	Malonyl-[acyl-carrier protein]	340.816	-2.08753	2.08753	7.42296e-13	7.46766e-12
PP_4219	pvdD	non-ribosomal peptide synthetase	2619.62	-2.08231	2.08231	1.43796e-09	1.08031e-08
PP_4372	fleS	Sensory box histidine kinase FleS	237.258	-2.08114	2.08114	3.48703e-24	7.65895e-23
PP_1033		Sulfatase domain protein	873.999	-2.07992	2.07992	4.08772e-18	6.25989e-17
PP_5470		conserved protein of unknown function	30.5883	2.07706	2.07706	3.97631e-09	2.83589e-08
PP_5641		conserved protein of unknown function	2123.97	-2.07521	2.07521	1.82706e-44	9.68519e-43
PP_3145		conserved protein of unknown function	2453.22	-2.07442	2.07442	5.13867e-25	1.15631e-23
PP_4572		conserved exported protein of unknown function	23.3159	2.07437	2.07437	4.87623e-07	2.69906e-06
PP_5538		putative ABC transporter, substrate-binding	13.6466	-2.07352	2.07352	0.00248007	0.00723419
PP_3417	gntT	D-gluconate transporter	3874.2	2.06256	2.06256	9.22423e-06	4.24484e-05
PP_0712	ppkB	polyphosphate kinase 2	869.867	-2.06147	2.06147	1.86449e-28	5.0141e-27
PP_4365	fliJ	Flagellar protein FliJ	16.8695	-2.0602	2.0602	0.00709467	0.01826
PP_3236		putative Lipoprotein OprI	66.7196	-2.05516	2.05516	1.43595e-06	7.45424e-06
PP_5385	czcC	metal RND efflux outer membrane protein, CzcC	27.8783	-2.05326	2.05326	3.67057e-05	0.000154237
PP_4394	flgA	flagella basal body P-ring formation protein	316.402	-2.05312	2.05312	7.58812e-28	1.95483e-26
PP_0989	gcvH-I	glycine cleavage system H protein 1	41.192	2.05009	2.05009	2.84547e-06	1.4158e-05
PP_3414		Methyl-accepting chemotaxis transducer	572.151	-2.04945	2.04945	1.99734e-24	4.44005e-23
PP_1816		Alcohol dehydrogenase, zinc-containing	713.594	-2.04888	2.04888	1.34995e-16	1.85593e-15
PP_2432	nfnB	6,7-dihydropteridine reductase	362.704	2.04769	2.04769	3.82307e-41	1.78615e-39
PP_3441		conserved protein of unknown function	498.992	-2.04697	2.04697	1.86256e-30	5.73647e-29
PP_1825		conserved exported protein of unknown function	26.2628	2.04301	2.04301	1.09945e-09	8.38352e-09
PP_0411		Polyamine ABC transporter, ATP-binding protein	247.91	-2.0353	2.0353	6.65921e-09	4.65891e-08
PP_2011		conserved exported protein of unknown function	294.59	-2.03526	2.03526	6.93444e-14	7.66124e-13
PP_0014		putative transposase	127.041	2.03456	2.03456	3.25828e-18	5.01757e-17
PP_3127		putative Exopolysaccharide transport protein	1096.88	-2.03302	2.03302	8.50897e-20	1.47053e-18
PP_0273		conserved protein of unknown function	108.842	-2.03025	2.03025	1.23875e-10	1.03946e-09
PP_1574		conserved protein of unknown function	80.4956	2.02385	2.02385	1.90754e-07	1.11283e-06
PP_5083		putative Type IV pili biogenesis protein PilM	137.661	-2.02185	2.02185	1.24377e-18	1.97606e-17
PP_5517		conserved exported protein of unknown function	829.27	-2.01918	2.01918	1.03689e-22	2.09392e-21
PP_1386	ttgA	Probable efflux pump periplasmic linker TtgA	778.654	2.01823	2.01823	4.8139e-32	1.59874e-30
PP_2759	rbsA-II	ribose ABC transporter - ATP-binding subunit	14.9422	-2.0178	2.0178	0.0012788	0.00398983
PP_2127		Sensor histidine kinase	23.4671	2.01579	2.01579	3.06368e-06	1.51481e-05
PP_0555	acoA	Acetoin:2,6-dichlorophenolindophenol	8.05708	2.01279	2.01279	0.00115244	0.00362222
PP_0615		Branched-chain amino acid ABC transporter,	15.5031	2.01041	2.01041	0.00152664	0.00467835
PP_4101		Acetyltransferase, GNAT family	43.9663	-2.00668	2.00668	3.01332e-09	2.18873e-08
PP_3231		conserved protein of unknown function	545.515	-2.0056	2.0056	2.82529e-09	2.06029e-08
PP_3421		Sensor histidine kinase	323.922	-2.00407	2.00407	2.97159e-21	5.55334e-20
PP_3131		conserved membrane protein of unknown function	402.618	-2.00319	2.00319	9.30998e-20	1.60394e-18
PP_3529	dmoA-II	dimethyl-sulfide monooxygenase	64.151	2.00304	2.00304	4.42575e-10	3.55673e-09
PP_3401		conserved protein of unknown function	9.65031	1.99944	1.99944	0.00370878	0.0103684
PP_5612		protein of unknown function	273.793	-1.99928	1.99928	3.30717e-12	3.18193e-11
PP_4102		conserved protein of unknown function	127.733	-1.99712	1.99712	5.36386e-15	6.54224e-14
PP_2705		conserved protein of unknown function	108.941	-1.99604	1.99604	2.27849e-13	2.42497e-12
PP_4851		Phosphate starvation-inducible protein, PSIF	538.366	-1.99583	1.99583	8.80547e-18	1.30848e-16
PP_5174		Efflux membrane fusion protein, RND family	292.208	-1.99457	1.99457	1.24273e-14	1.46706e-13
PP_5166		Sigma-54 dependent transcriptional regulator	28.3504	1.99437	1.99437	0.000113186	0.000436664
PP_2766		Long-chain-fatty-acid--CoA ligase-related	18.7274	-1.98538	1.98538	0.00319087	0.00907702
PP_0495	ansA	type 1 L-asparaginase	65.3191	1.98077	1.98077	2.37895e-14	2.74951e-13
PP_5598		conserved protein of unknown function	93.4541	-1.97874	1.97874	1.53594e-05	6.82324e-05
PP_5365		putative fatty acid methyltransferase	5435.87	-1.97678	1.97678	2.14504e-20	3.852e-19
PP_4244	pvdS	alternative sigma factor	182.094	-1.97634	1.97634	1.51669e-05	6.74477e-05
PP_3451		conserved exported protein of unknown function	13.1734	-1.9742	1.9742	0.00710568	0.0182798
PP_5629		putative intracellular protease	610.808	-1.97418	1.97418	3.97228e-33	1.3518e-31
PP_5541		conserved protein of unknown function	14.7399	-1.97174	1.97174	0.000637281	0.00211137
PP_2720		conserved protein of unknown function	13.8462	-1.97149	1.97149	0.00406042	0.0111814
PP_1156	yfdC	putative inner membrane protein	61.924	1.96916	1.96916	2.1436e-17	3.08555e-16
PP_4528		conserved protein of unknown function	38.5072	1.96885	1.96885	5.36651e-10	4.28156e-09
PP_4676	msrP	methionine sulfoxide reductase catalytic	87.3583	1.96639	1.96639	4.05087e-20	7.13497e-19
PP_3437	yegH	putative transporter	516.146	1.96505	1.96505	3.40886e-22	6.7118e-21
PP_2536		Glutathione S-transferase family protein	442.348	-1.96503	1.96503	8.62859e-29	2.35492e-27
PP_1446		TonB-dependent receptor	54.2647	1.96226	1.96226	7.11053e-10	5.56673e-09
PP_4285	pucM	5-hydroxyisourate hydrolase	36.2784	-1.95938	1.95938	0.000217831	0.000796883
PP_5639		conserved exported protein of unknown function	108.346	-1.95794	1.95794	9.45641e-14	1.03001e-12
PP_0683		conserved protein of unknown function	103.579	-1.95725	1.95725	2.07171e-07	1.20225e-06
PP_0230	atsK	alpha-ketoglutarate-dependent sulfonate	57.5554	1.95394	1.95394	6.72881e-06	3.16248e-05
PP_1083		(2Fe-2S)-binding protein	39.8815	-1.95141	1.95141	0.00155092	0.00475012
PP_3795		conserved exported protein of unknown function	319.829	-1.94553	1.94553	1.38057e-21	2.61549e-20
PP_0886		conserved exported protein of unknown function	566.856	1.94488	1.94488	4.53704e-20	7.96583e-19
PP_2059		UPF0337 protein PP_2059	13.167	1.94234	1.94234	0.000105752	0.000409418
PP_0633	pilC	Type 4 fimbrial assembly protein PilC	148.46	-1.94175	1.94175	1.36838e-18	2.16778e-17
PP_0616		Branched-chain amino acid ABC transporter, ATP	26.9046	1.92988	1.92988	0.00385884	0.0107227
PP_3555		putative Transmembrane sensor	1009.14	-1.92884	1.92884	2.80843e-14	3.22559e-13
PP_4683	mrcB	transglycosylase	804.343	1.92863	1.92863	1.13705e-40	5.09639e-39
PP_0134		conserved exported protein of unknown function	50.9103	1.92852	1.92852	2.67731e-12	2.60317e-11
PP_1076	glpF	aquaglyceroporin	68.3372	1.9251	1.9251	1.0936e-10	9.26113e-10
PP_2507		Oxidoreductase, short-chain	104.019	-1.92239	1.92239	2.2126e-14	2.56802e-13
PP_1099	capB	Cold shock protein CapB	196.217	-1.91572	1.91572	0.000378308	0.00131336
PP_3629		conserved protein of unknown function	272.422	-1.90661	1.90661	9.47243e-14	1.03001e-12
PP_2779		putative Beta-ketoacyl synthase	10.1867	-1.90602	1.90602	0.00713942	0.018358
PP_4388	flgE	Flagellar hook protein FlgE	2479.92	-1.90492	1.90492	4.43304e-22	8.6358e-21
PP_3635		putative Sulfonate ABC transporter, permease	181.868	-1.90075	1.90075	9.36408e-19	1.5007e-17
PP_5681		conserved protein of unknown function	12.1992	-1.90009	1.90009	0.00992318	0.0245761
PP_3621	iorA-II	isoquinoline 1-oxidoreductase subunit alpha	127.458	-1.90006	1.90006	2.77151e-09	2.02643e-08
PP_2640		Acetyltransferase, GNAT family	22.294	-1.89558	1.89558	0.00175766	0.005327
PP_1281	algL	Alginate lyase	32.5575	1.89485	1.89485	2.64713e-08	1.7291e-07
PP_2506		conserved membrane protein of unknown function	18.9179	-1.89475	1.89475	0.000168797	0.000630045
PP_3411		conserved protein of unknown function	13.5639	-1.89464	1.89464	0.0103931	0.0256134
PP_2861		Methyl-accepting chemotaxis transducer	478.047	-1.89334	1.89334	0.00893729	0.0223351
PP_3129	galE	UDP-glucose 4-epimerase	406.874	-1.89022	1.89022	2.17967e-22	4.35382e-21
PP_2725	pfpI	Protease PfpI	32.8964	1.88943	1.88943	3.59129e-09	2.57462e-08
PP_4385	flgG	flagellar basal-body rod protein FlgG	834.465	-1.88697	1.88697	2.20873e-29	6.34205e-28
PP_3804		conserved exported protein of unknown function	353.719	-1.88658	1.88658	4.51969e-09	3.20683e-08
PP_1859	ohr	Organic hydroperoxide resistance protein	1158.19	-1.88648	1.88648	4.65814e-16	6.12895e-15
PP_3734		putative ABC transporter, permease protein	71.7422	-1.88516	1.88516	4.58507e-10	3.67405e-09
PP_4247		Exonuclease	177.92	-1.88288	1.88288	6.62169e-14	7.34514e-13
PP_0207		putative Nitrate ABC transporter, periplasmic	14.0831	1.88114	1.88114	0.000150856	0.000568855
PP_4657	ypfJ	zinc metalloprotease	894.087	-1.8805	1.8805	4.37366e-22	8.55034e-21
PP_5718		conserved membrane protein of unknown function	66.8662	-1.88001	1.88001	4.64264e-08	2.90191e-07
PP_4210	pvdT	pyoverdine efflux carrier and ATP binding	188.562	-1.87894	1.87894	1.60445e-05	7.09328e-05
PP_0315	gbcA	putative glycine-betaine dioxygenase subunit	80.828	1.877	1.877	3.35249e-15	4.19099e-14
PP_3518		conserved exported protein of unknown function	182.069	-1.87445	1.87445	1.94647e-12	1.91282e-11
PP_5424		conserved protein of unknown function	536.894	-1.87443	1.87443	5.54916e-23	1.14579e-21
PP_3260	ligD	DNA ligase D	22.3239	1.87292	1.87292	3.20511e-06	1.58048e-05
PP_0151		conserved exported protein of unknown function	12.8604	1.86371	1.86371	0.000220721	0.000805127
PP_2819	oprJ	Outer membrane protein OprJ	66.1036	-1.86301	1.86301	1.63651e-05	7.22346e-05
PP_0215		Response regulator	755.514	-1.86284	1.86284	6.94624e-23	1.42359e-21
PP_1385	ttgB	Probable efflux pump membrane transporter TtgB	2066.3	1.86017	1.86017	1.69878e-28	4.59086e-27
PP_4070		conserved protein of unknown function	128.766	-1.85978	1.85978	0.000443429	0.00151824
PP_3982		conserved protein of unknown function	3946.1	-1.85915	1.85915	8.00639e-30	2.36039e-28
PP_4390	flgC	flagellar basal-body rod protein FlgC	250.438	-1.85699	1.85699	5.72096e-12	5.42851e-11
PP_3294		Universal stress protein family	349.161	-1.85483	1.85483	9.94687e-14	1.07947e-12
PP_3128		putative Exopolysaccharide	1387.03	-1.85449	1.85449	2.6687e-19	4.44488e-18
PP_1058		conserved protein of unknown function	964.875	-1.85443	1.85443	5.31182e-19	8.66392e-18
PP_5173		RND efflux transporter	1552.51	-1.85398	1.85398	5.34879e-27	1.30477e-25
PP_2537		conserved protein of unknown function	68.9431	-1.85275	1.85275	3.62328e-08	2.30128e-07
PP_5192	gcvP-II	glycine dehydrogenase	2141.79	-1.85197	1.85197	6.41981e-17	8.98284e-16
PP_1893	fadE	medium-long chain acyl-CoA dehydrogenase	1747.29	-1.84972	1.84972	4.59903e-15	5.67214e-14
PP_3156		Universal stress protein family	372.722	-1.84968	1.84968	6.03375e-13	6.14862e-12
PP_4470		putative transcriptional regulator (Arc	195.389	1.8494	1.8494	6.42666e-15	7.73584e-14
PP_5334		conserved membrane protein of unknown function	76.4482	-1.84815	1.84815	8.27832e-07	4.46997e-06
PP_2744		Ribose-phosphate pyrophosphokinase family	309.194	-1.84722	1.84722	8.47772e-15	1.00945e-13
PP_3956		conserved protein of unknown function	11.188	-1.84436	1.84436	0.00991165	0.0245586
PP_3019		Carbon-nitrogen hydrolase family protein	274.595	-1.84211	1.84211	2.16142e-22	4.33306e-21
PP_4834		SPFH domain	397.729	-1.83692	1.83692	4.18106e-16	5.54091e-15
PP_3058		conserved protein of unknown function	9.5102	1.83659	1.83659	0.00276538	0.00799872
PP_1565		Phage portal protein, HK97 family	237.045	1.83575	1.83575	4.72839e-11	4.1509e-10
PP_2662		conserved exported protein of unknown function	19.5272	-1.83255	1.83255	0.000253917	0.000912547
PP_0929		putative Lipoprotein	14.4059	1.8306	1.8306	0.000177721	0.000659338
PP_2964		putative transposase	1480.14	-1.82973	1.82973	2.46393e-14	2.84177e-13
PP_4553		RNA polymerase sigma-70 factor, ECF subfamily	168.538	-1.82837	1.82837	9.54583e-11	8.15909e-10
PP_4369	fliF	Flagellar M-ring protein	811.972	-1.82829	1.82829	4.26755e-48	2.67352e-46
PP_3774		conserved protein of unknown function	58.2711	1.82772	1.82772	1.79419e-09	1.33667e-08
PP_5339	oruR	transcriptional regulator, ornithine	37.2106	1.82729	1.82729	5.34244e-05	0.000218818
PP_4111	fusB	Elongation factor G 2	2090.97	-1.82443	1.82443	6.42769e-19	1.04223e-17
PP_2107		conserved protein of unknown function	21.4073	-1.82432	1.82432	0.00036954	0.00128623
PP_0716		HlyD family secretion protein	72.3492	-1.81663	1.81663	3.50824e-06	1.71614e-05
PP_3005		conserved protein of unknown function	39.9991	-1.81478	1.81478	1.36994e-06	7.13842e-06
PP_0763		Medium-chain-fatty-acid CoA ligase	3156.74	-1.81226	1.81226	4.36155e-14	4.8972e-13
PP_1817		Oxidoreductase, short-chain	45.7496	-1.80975	1.80975	2.93179e-06	1.45481e-05
PP_3693		putative Transcriptional regulator MvaT, P16	1499.84	-1.80721	1.80721	3.4467e-16	4.61205e-15
PP_4864	braF	High-affinity branched-chain amino acid	273.75	1.80389	1.80389	7.56984e-13	7.60156e-12
PP_0395	ycgB	putative type IV piliation protein	5403.64	-1.80358	1.80358	6.46533e-13	6.56416e-12
PP_4389	flgD	Flagellar basal-body rod modification protein	696.283	-1.80301	1.80301	2.71628e-18	4.21827e-17
PP_4059	treSB	fused trehalose synthase B	1060.86	-1.80273	1.80273	3.37557e-11	3.00639e-10
PP_3440		conserved protein of unknown function	412.352	-1.80093	1.80093	4.95925e-23	1.03956e-21
PP_5557		protein of unknown function	24.3967	-1.80074	1.80074	0.000311438	0.0010985
PP_0397	yeaG	protein kinase	19851.3	-1.797	1.797	2.14426e-15	2.71754e-14
PP_3297		conserved protein of unknown function	51.5874	-1.7954	1.7954	2.91491e-06	1.44905e-05
PP_1306		Pyocin S-type Killer domain protein	65.3646	-1.79459	1.79459	1.10371e-05	5.02457e-05
PP_3735		ABC transporter ATP-binding protein	41.4792	-1.79355	1.79355	3.16098e-07	1.78185e-06
PP_0363	bioF	8-amino-7-oxononanoate synthase	579.628	-1.79297	1.79297	5.43357e-15	6.61264e-14
PP_3416	gnuK	D-gluconate kinase	1013.97	1.78966	1.78966	1.28365e-11	1.18143e-10
PP_4382	flgJ	Peptidoglycan hydrolase FlgJ	645.215	-1.78819	1.78819	4.47074e-26	1.0533e-24
PP_1670		putative Lipoprotein	362.932	-1.78769	1.78769	9.1549e-18	1.35675e-16
PP_0052		beta-lactamase domain protein, putative	212.944	-1.78378	1.78378	2.72889e-16	3.68735e-15
PP_3288		Universal stress protein family	2537.24	-1.78267	1.78267	3.04896e-09	2.2117e-08
PP_3055	gpI	Pyocin R2_PP, tail formation protein	8.79926	1.78207	1.78207	0.00205815	0.00611018
PP_4368	fliG	flagellar motor switch protein	1040.42	-1.78055	1.78055	2.16868e-31	6.99177e-30
PP_4194	gltA	citrate synthase	11480.5	1.78048	1.78048	3.74144e-11	3.31617e-10
PP_1155		YaiC	196.873	-1.78045	1.78045	3.37511e-16	4.52724e-15
PP_3309	paoB	promiscuous aromatic aldehyde dehydrogenase,	10.1091	1.77941	1.77941	0.00105612	0.0033462
PP_3577	fecI	RNA polymerase, sigma 19 factor	18.2649	1.77719	1.77719	0.0140901	0.0334535
PP_4554		conserved protein of unknown function	89.4995	-1.77572	1.77572	1.53188e-06	7.91495e-06
PP_3431		ThiJ	1264.29	-1.77539	1.77539	9.81412e-18	1.45054e-16
PP_2869		Oxidoreductase, FMN-binding	25.2446	1.77127	1.77127	7.6331e-06	3.55416e-05
PP_3350		conserved exported protein of unknown function	29.1186	-1.76845	1.76845	2.17845e-05	9.46396e-05
PP_0946	sodA	superoxide dismutase (Mn)	260.332	-1.76666	1.76666	0.00282385	0.0081522
PP_3523		conserved protein of unknown function	53.0994	-1.76659	1.76659	1.78628e-09	1.33258e-08
PP_3243		Acetyltransferase, GNAT family	15.8036	1.76491	1.76491	0.000510015	0.00171237
PP_0122		conserved exported protein of unknown function	123.765	-1.76407	1.76407	1.27028e-06	6.6632e-06
PP_4403	bkdB	Lipoamide acyltransferase component of	163.071	1.76358	1.76358	1.56233e-08	1.04655e-07
PP_0550		conserved protein of unknown function	589.274	-1.76015	1.76015	1.98931e-08	1.31028e-07
PP_0718		Sulfate transporter	143.953	-1.75728	1.75728	3.27591e-13	3.43348e-12
PP_0364	bioH	pimeloyl-[acp] methyl ester esterase	406.748	-1.75617	1.75617	1.34796e-17	1.97117e-16
PP_1957		Oxidoreductase, Pdr	38.4472	1.75574	1.75574	1.65516e-08	1.10204e-07
PP_5406		transposase	122.992	1.7518	1.7518	1.17181e-14	1.38631e-13
PP_0714		Transporter, PerM family	170.019	-1.7518	1.7518	3.95229e-09	2.82241e-08
PP_1438	czcR-III	response regulator	17.3996	1.7476	1.7476	0.000894198	0.00286945
PP_3137		Glycosyl transferase, group 2 family protein	357.489	-1.74028	1.74028	2.00051e-11	1.81693e-10
PP_4402	bkdAB	branched-chain alpha-keto acid dehydrogenase	112.176	1.73298	1.73298	1.11861e-05	5.084e-05
PP_1578		conserved protein of unknown function	56.5674	1.73262	1.73262	1.3571e-06	7.09137e-06
PP_4343	flhF	Flagellar biosynthesis protein FlhF	1304.2	-1.73115	1.73115	3.10897e-22	6.14329e-21
PP_2251		conserved membrane protein of unknown function	42.7281	-1.73104	1.73104	1.70748e-06	8.73225e-06
PP_0731	pcs	phosphatidylcholine synthase	36.9689	-1.72887	1.72887	2.2661e-07	1.30407e-06
PP_0239	ssuC	aliphatic sulfonate ABC transporter - permease	23.3017	1.72818	1.72818	0.00047132	0.00159508
PP_3420		Sensor histidine kinase	126.986	-1.72786	1.72786	2.55881e-07	1.46184e-06
PP_4254		conserved protein of unknown function	79.5526	-1.72699	1.72699	8.59373e-07	4.63121e-06
PP_4011	icd	isocitrate dehydrogenase, NADP(+)-specific	9574.14	-1.72697	1.72697	7.18211e-10	5.60042e-09
PP_1201		conserved exported protein of unknown function	404.572	-1.72684	1.72684	7.97746e-11	6.86111e-10
PP_3537	pobA	p-hydroxybenzoate hydroxylase	95.0573	-1.72624	1.72624	9.28148e-05	0.00036301
PP_5222	cyaA	adenylate cyclase	182.033	1.72602	1.72602	7.4939e-29	2.05542e-27
PP_1761	yegE	diguanylate cyclase with phosphodiesterase	1793.07	-1.72539	1.72539	2.75198e-22	5.45742e-21
PP_2527		conserved membrane protein of unknown function	139.324	-1.72422	1.72422	1.8217e-16	2.47975e-15
PP_1714	fklB-II	FKBP-type peptidyl-prolyl cis-trans isomerase	2180.34	1.72421	1.72421	2.61038e-47	1.58143e-45
PP_3020		putative Serine	181.953	-1.72282	1.72282	3.69892e-11	3.28905e-10
PP_1115		putative Lipoprotein	39.2074	-1.72143	1.72143	1.13548e-07	6.78215e-07
PP_1775		Metallo-beta-lactamase family protein	346.809	-1.71974	1.71974	3.90656e-14	4.39528e-13
PP_2205	copA-I	copper resistance protein A	93.4641	1.7183	1.7183	3.12168e-09	2.2585e-08
PP_5523		conserved protein of unknown function	22.3919	-1.71708	1.71708	0.000195752	0.000721377
PP_4329		FlhB domain protein	12.1135	-1.71405	1.71405	0.00518708	0.0138683
PP_5367		Transketolase domain protein	78.2379	-1.7124	1.7124	5.04686e-07	2.78512e-06
PP_0310	dgcA	putative dimethylglycine dehydrogenase subunit	68.6025	1.71086	1.71086	3.01818e-15	3.78164e-14
PP_5361		47 kDa protein	266.238	1.70588	1.70588	2.83341e-13	2.98103e-12
PP_2528		O-acetylhomoserine (thiol)-lyase	1017.82	-1.7057	1.7057	1.3132e-15	1.68756e-14
PP_4359	fliL	Flagellar protein FliL	126.31	-1.70542	1.70542	9.21778e-09	6.36015e-08
PP_5378		putative metal-binding protein	684.368	1.70526	1.70526	5.76466e-12	5.46058e-11
PP_2385	azlC	Branched-chain amino acid transport protein	35.0072	1.70406	1.70406	3.00359e-06	1.48776e-05
PP_5433		putative NADH:ubiquinone oxidoreductase subunit	540.525	-1.7017	1.7017	1.52644e-13	1.63721e-12
PP_4374	fliT	flagellar protein	186.166	-1.70122	1.70122	3.61097e-19	5.96027e-18
PP_3072	eco	Ecotin	305.973	-1.70065	1.70065	7.39803e-13	7.45618e-12
PP_2575		conserved exported protein of unknown function	99.9861	-1.6977	1.6977	1.95699e-08	1.29208e-07
PP_3803		putative Cation ABC transporter, permease	131.026	-1.69649	1.69649	1.21337e-07	7.22387e-07
PP_4425		putative amino-acid ABC transporter ATP-binding	77.4344	1.69475	1.69475	3.02054e-08	1.94991e-07
PP_0619		Branched-chain amino acid ABC transporter,	79.2487	1.69432	1.69432	1.57099e-05	6.95653e-05
PP_3138		VirK domain protein	507.684	-1.69388	1.69388	1.22281e-15	1.57508e-14
PP_0386		Sensory box protein	1069.9	-1.69386	1.69386	8.11258e-32	2.67812e-30
PP_3312		putative Heat shock protein	43.701	-1.69297	1.69297	5.82492e-05	0.00023682
PP_2389		conserved protein of unknown function	2247.94	-1.6928	1.6928	2.5332e-45	1.36917e-43
PP_5026	opgG	Glucans biosynthesis protein G	1956.16	1.67659	1.67659	2.02679e-28	5.42413e-27
PP_1196		conserved exported protein of unknown function	247.91	-1.67618	1.67618	8.28919e-14	9.06712e-13
PP_5234	glnK	activator of NRII(GlnL	674.928	-1.67466	1.67466	8.67168e-08	5.28254e-07
PP_2801	prr	gamma-aminobutyraldehyde dehydrogenase	7.95238	1.67459	1.67459	0.00314413	0.00895792
PP_2345		conserved exported protein of unknown function	52.5803	1.67448	1.67448	2.53405e-05	0.000109228
PP_1018	gtsD	mannose	4682.93	1.67417	1.67417	1.41452e-06	7.35683e-06
PP_3175		putative Dioxygenase, ferredoxin reductase	5.6329	1.67373	1.67373	0.0203643	0.0460871
PP_2902	lpxH	UDP-2,3-diacylglucosamine hydrolase	327.018	1.67373	1.67373	1.89348e-25	4.29578e-24
PP_3242		GGDEF domain protein	335.615	-1.67373	1.67373	1.5496e-11	1.4191e-10
PP_2817	mexC	Multidrug efflux RND membrane fusion protein	22.836	1.67359	1.67359	0.00571627	0.0151072
PP_3613		L-sorbosone dehydrogenase	129.2	1.67336	1.67336	7.26592e-25	1.62174e-23
PP_5717		conserved protein of unknown function	96.0135	-1.6723	1.6723	2.72863e-06	1.36135e-05
PP_2149	gapB	glyceraldehyde-3-phosphate dehydrogenase	11742.3	1.6721	1.6721	1.23011e-35	4.64492e-34
PP_1484	ydcT	predicted polyamine ABC transporter, ATP-binding	131.973	-1.67124	1.67124	2.49086e-07	1.42894e-06
PP_3375	endA	endonuclease I	52.6585	1.66997	1.66997	2.14642e-07	1.24168e-06
PP_3801		putative Cation ABC transporter, periplasmic	269.616	-1.66835	1.66835	5.69769e-07	3.12551e-06
PP_5006		Transcriptional regulator, TetR family	196.456	-1.66827	1.66827	1.97124e-14	2.29271e-13
PP_3006		RNA polymerase sigma-70 factor, ECF subfamily	32.0751	-1.66754	1.66754	0.000101182	0.000394215
PP_1035	tadA	tRNA-specific adenosine deaminase monomer	40.5279	-1.66676	1.66676	0.000247385	0.000892562
PP_5393		putative metal-binding chaperone	16.762	-1.66516	1.66516	0.00192469	0.00576361
PP_3126		putative polysaccharide exported protein	475.366	-1.66392	1.66392	1.92951e-15	2.45101e-14
PP_3704		conserved protein of unknown function	276.779	-1.66273	1.66273	3.82165e-06	1.86449e-05
PP_4060	glgE	Alpha-1,4-glucan:maltose-1-phosphate	1400.36	-1.66244	1.66244	5.06748e-12	4.82505e-11
PP_2863		conserved membrane protein of unknown function	34.0188	-1.66186	1.66186	0.00389883	0.0108066
PP_4433		Amino acid MFS transporter	15.5007	1.65831	1.65831	0.00201329	0.0059925
PP_3255		non-homologous end joining protein	122.213	1.6582	1.6582	5.08342e-17	7.16749e-16
PP_1082	bfr-II	bacterioferritin	5031.45	-1.65422	1.65422	5.16271e-10	4.13092e-09
PP_0190		putative disulfide bond formation protein B	32.267	1.65355	1.65355	5.61971e-06	2.66622e-05
PP_2136	fadB	enoyl-CoA hydratase	1224.69	1.65275	1.65275	5.84232e-21	1.07362e-19
PP_0947		conserved membrane protein of unknown function	108.618	-1.65178	1.65178	1.94207e-05	8.49734e-05
PP_3133		putative Oxidoreductase	1144.29	-1.65127	1.65127	1.00627e-26	2.42251e-25
PP_0715		Outer membrane efflux protein	111.678	-1.64828	1.64828	1.80915e-06	9.20947e-06
PP_3314		Heat shock protein, HSP20 family	61.2088	-1.64526	1.64526	9.3413e-09	6.43732e-08
PP_3545		Sensory box histidine kinase	512.129	-1.64413	1.64413	2.51055e-17	3.60433e-16
PP_4100		Transcriptional regulator, Cro	236.027	-1.64278	1.64278	2.71742e-14	3.12759e-13
PP_0367		conserved protein of unknown function	1080.4	-1.64256	1.64256	7.94325e-09	5.52221e-08
PP_0876		Transcriptional regulator, AraC family	60.0071	1.64243	1.64243	4.1476e-12	3.96287e-11
PP_1577		Phage tail tape meausure protein, lambda family	597.139	1.64221	1.64221	1.10036e-10	9.30413e-10
PP_4645	mscL	Large-conductance mechanosensitive channel	1085.34	-1.6421	1.6421	6.18573e-06	2.91469e-05
PP_1019	oprB-I	carbohydrate-selective porin	9009.55	1.64096	1.64096	0.000278451	0.000992948
PP_1585		putative Antidote protein	89.2355	-1.64085	1.64085	0.000210788	0.000774202
PP_1682		putative glycoside hydrolase family protein	34.9246	1.63779	1.63779	3.82428e-08	2.4178e-07
PP_0614		putative N-carbamoyl-beta-alanine	84.4	1.63729	1.63729	8.09202e-05	0.000319337
PP_3230		Phosphoribosyl transferase domain protein	290.205	-1.63318	1.63318	1.36497e-15	1.75001e-14
PP_3851		conserved protein of unknown function	38.0691	-1.63235	1.63235	0.000169501	0.000632247
PP_0897		Fumarate hydratase, class I	6735.32	1.63135	1.63135	4.29114e-11	3.77908e-10
PP_1298	yhdX	putative amino acid ABC transporter - permease	53.4125	1.6297	1.6297	0.000515764	0.00173062
PP_0628		conserved protein of unknown function	226.17	-1.62439	1.62439	6.2862e-15	7.58334e-14
PP_1983		PAS	1507.33	-1.62295	1.62295	2.89888e-17	4.12959e-16
PP_3430		Sensory box histidine kinase	1042.71	-1.62103	1.62103	1.33672e-30	4.16348e-29
PP_2322	oprI	Major outer membrane lipoprotein	20198.8	-1.61971	1.61971	1.18401e-05	5.36357e-05
PP_4665		conserved protein of unknown function	16.4919	-1.6169	1.6169	0.00247349	0.00721881
PP_3296		putative transporter	253.284	-1.61544	1.61544	1.11741e-10	9.43386e-10
PP_4813		PAP2 family protein	188.414	1.61259	1.61259	3.67505e-08	2.32613e-07
PP_1458	yhjE	putative inner membrane metabolite transport	335.953	-1.61049	1.61049	8.90116e-07	4.76891e-06
PP_3524		conserved protein of unknown function	9.36301	1.60953	1.60953	0.00496249	0.013326
PP_3293		conserved membrane protein of unknown function	43.5051	-1.60721	1.60721	6.48386e-07	3.54618e-06
PP_5405		transposase	371.346	1.60655	1.60655	1.01825e-12	1.01512e-11
PP_5377		conserved hypothetical protein	211.208	1.60643	1.60643	6.70715e-13	6.79716e-12
PP_0254		conserved protein of unknown function	97.2807	-1.6056	1.6056	4.27576e-08	2.68477e-07
PP_1305	imm	Colicin-E7 immunity protein	42.5692	-1.60524	1.60524	0.000103103	0.00040057
PP_4212	pvdP	pyoverdine biosynthesis related protein	354.917	-1.60478	1.60478	1.6576e-06	8.50868e-06
PP_2348		Sensor histidine kinase	109.03	1.60433	1.60433	8.07288e-15	9.65418e-14
PP_4973		conserved membrane protein of unknown function	393.353	-1.60366	1.60366	4.16552e-07	2.31965e-06
PP_4748		Amino acid ABC transporter, periplasmic amino	175.157	1.59983	1.59983	1.31093e-16	1.80829e-15
PP_1726		ABC transporter, periplasmic binding protein	2129	-1.59854	1.59854	1.18395e-12	1.17184e-11
PP_1221	tolA	colicin S4 and filamentous phage transport	1089.13	1.59794	1.59794	1.73203e-12	1.70512e-11
PP_4334		ParA family protein	479.816	-1.59557	1.59557	1.58386e-19	2.67847e-18
PP_5486		conserved protein of unknown function	12.2704	-1.59524	1.59524	0.0164728	0.038442
PP_1480		conserved protein of unknown function	55.7842	-1.59441	1.59441	2.82026e-06	1.40453e-05
PP_0205		putative Oxidoreductase	208.082	1.59351	1.59351	4.48111e-11	3.94009e-10
PP_1954		conserved protein of unknown function	31.897	1.59294	1.59294	0.000175304	0.000651248
PP_5005	phaC-II	Poly(3-hydroxyalkanoate) polymerase 2	861.654	-1.59094	1.59094	7.50949e-18	1.125e-16
PP_1921		conserved protein of unknown function	1140.33	-1.5859	1.5859	5.02879e-23	1.04618e-21
PP_5379	copB-II	copper resistance protein B	894.831	1.58585	1.58585	1.74775e-20	3.16952e-19
PP_0308		putative dipeptidase	27.0135	1.58539	1.58539	4.73073e-07	2.62379e-06
PP_3452		GGDEF domain protein	54.5525	-1.58521	1.58521	1.13479e-07	6.78215e-07
PP_0257	fdhD	protein sulfur transferase	91.5051	-1.5844	1.5844	3.97571e-10	3.2044e-09
PP_3742		Glutathione S-transferase family protein	572.308	-1.58389	1.58389	1.08455e-19	1.85686e-18
PP_2252		conserved exported protein of unknown function	20.3358	-1.58252	1.58252	0.00396708	0.0109654
PP_4357	fliN	C-ring protein of the flagellar basal body	267.683	-1.58202	1.58202	4.77884e-17	6.75532e-16
PP_5036	hutF	probable formiminoglutamate deiminase	76.494	-1.58144	1.58144	5.39426e-07	2.97089e-06
PP_4565	aceK	Isocitrate dehydrogenase kinase	491.769	-1.5812	1.5812	1.10446e-17	1.62805e-16
PP_2499		conserved protein of unknown function	318.257	-1.57978	1.57978	1.28813e-05	5.80661e-05
PP_1631		conserved protein of unknown function	896.611	-1.5796	1.5796	1.0131e-14	1.20112e-13
PP_5003	phaA	poly(3-hydroxyalkanoate) polymerase 1	3712.57	-1.57894	1.57894	1.16496e-08	7.93874e-08
PP_4234		Aldehyde oxidase and xanthine dehydrogenase	263.433	1.57694	1.57694	2.70765e-10	2.21872e-09
PP_2171		Transporter, LysE family	72.1267	-1.57675	1.57675	1.48961e-08	1.00027e-07
PP_4575		Urea amidolyase-related protein	570.594	-1.57584	1.57584	1.03691e-18	1.65696e-17
PP_4640		conserved protein of unknown function	23.9024	-1.57462	1.57462	0.00308476	0.00880241
PP_4847	cbpM	chaperone modulatory of CbpA co-chaperone	101.52	-1.57402	1.57402	6.81991e-08	4.20091e-07
PP_0050		conserved exported protein of unknown function	15.3088	1.57357	1.57357	0.00392605	0.0108711
PP_3238		putative Transcriptional regulator PyrR	98.8017	-1.57189	1.57189	1.10685e-08	7.56142e-08
PP_3206		conserved protein of unknown function	7.45896	1.57144	1.57144	0.0117247	0.0284626
PP_4407		putative Gamma-aminobutyrate transporter	156.853	-1.57112	1.57112	2.59636e-11	2.32744e-10
PP_3004		conserved protein of unknown function	56.2822	-1.56931	1.56931	7.30823e-05	0.000290695
PP_1863		Transcriptional regulator, LysR family	143.058	-1.56818	1.56818	7.6595e-08	4.69709e-07
PP_5546		conserved protein of unknown function	19.3016	-1.56684	1.56684	0.00866592	0.0217853
PP_1382	pcaP	putative porin-encoding gene	75.4808	-1.56418	1.56418	1.06707e-07	6.41284e-07
PP_3216		putative cysteine dioxygenase	55.3322	-1.56233	1.56233	8.67263e-07	4.66461e-06
PP_3237		Universal stress protein family	640.555	-1.56164	1.56164	9.83171e-15	1.16815e-13
PP_3419		Sigma-54 dependent transcriptional	409.964	-1.56161	1.56161	2.43468e-06	1.22244e-05
PP_1013		Sensor histidine kinase	162.279	1.56072	1.56072	2.03374e-07	1.18395e-06
PP_3559		glycine betaine ABC transporter (permease)	147.337	-1.55957	1.55957	7.30677e-09	5.09257e-08
PP_1662		conserved protein of unknown function	13.8562	1.5589	1.5589	0.00269773	0.00781943
PP_4666	mmsB	3-hydroxyisobutyrate dehydrogenase	363.975	-1.55857	1.55857	2.73958e-08	1.78315e-07
PP_1202		putative enzyme involved in modification of	285.81	-1.55857	1.55857	1.64399e-11	1.50304e-10
PP_4358	fliM	flagellar synthesis, switching and energizing	399.616	-1.55814	1.55814	3.00704e-18	4.65668e-17
PP_1384	ttgC	Probable efflux pump outer membrane protein	1110.66	1.55734	1.55734	1.6867e-28	4.58069e-27
PP_3899		conserved protein of unknown function, hicB	72.068	-1.55632	1.55632	0.000115963	0.000446754
PP_4308		Transcriptional regulator, AsnC family	54.0455	-1.55526	1.55526	0.000571871	0.00190612
PP_4344	flhA	flagellar export pore protein	865.855	-1.55157	1.55157	2.8203e-43	1.40075e-41
PP_5737		conserved protein of unknown function	3095.68	-1.55142	1.55142	1.03726e-29	3.0417e-28
PP_3723	aruI	putative 2-ketoarginine decarboxylase AruI	109.242	1.55	1.55	1.69865e-06	8.71133e-06
PP_0312		electron transfer flavoprotein, alpha subunit	19.0237	1.54964	1.54964	6.98138e-05	0.000279712
PP_2126		DNA-binding response regulator, LuxR family	15.1722	1.54792	1.54792	0.00046617	0.00158056
PP_3624		conserved exported protein of unknown function	45.842	-1.54791	1.54791	2.30956e-05	9.98637e-05
PP_1273		putative Multidrug efflux MFS outer membrane	72.6518	-1.54656	1.54656	2.03361e-09	1.50285e-08
PP_4542		putative ABC transporter, ATP-binding	770.593	-1.54601	1.54601	6.83142e-30	2.02482e-28
PP_0238	ssuD	alkanesulfonate monooxygenase	49.4653	1.54531	1.54531	2.66179e-07	1.51752e-06
PP_0233	tauA	taurine ABC transporter periplasmic binding	97.8137	1.54516	1.54516	7.30485e-07	3.96765e-06
PP_0722	prs	Ribose-phosphate pyrophosphokinase	3955.69	1.54317	1.54317	7.11046e-11	6.15384e-10
PP_0317		Methyl-accepting chemotaxis transducer	40.1631	1.54223	1.54223	2.68498e-07	1.52916e-06
PP_3010		conserved exported protein of unknown function	122.505	-1.53978	1.53978	1.01334e-11	9.43671e-11
PP_3869		putative Phage sheath protein	16.2938	1.53581	1.53581	0.00265367	0.00769984
PP_4208		RNA polymerase sigma-70 factor, ECF subfamily	96.377	-1.53546	1.53546	0.000218959	0.000799949
PP_2215		acetyl-CoA acetyltransferase	119.391	1.53503	1.53503	1.79584e-06	9.15861e-06
PP_4669		OmpA family protein	205.02	-1.53406	1.53406	5.79921e-12	5.48388e-11
PP_0132	kinB	Alginate biosynthesis sensor protein KinB	314.621	1.53384	1.53384	7.94696e-23	1.62265e-21
PP_2026		conserved protein of unknown function	26.0219	-1.53154	1.53154	0.0018599	0.00559695
PP_4395	flgM	Negative regulator of flagellin synthesis FlgM	629.752	-1.53103	1.53103	1.39853e-07	8.25493e-07
PP_1725		conserved protein of unknown function	297.842	-1.52969	1.52969	5.45738e-15	6.62699e-14
PP_3485		conserved exported protein of unknown function	48.5027	-1.52831	1.52831	0.000191804	0.000708247
PP_4383	flgI	Flagellar P-ring protein	671.125	-1.52591	1.52591	4.44135e-23	9.38128e-22
PP_2253		Transcriptional regulator, GntR family	28.3322	1.52554	1.52554	0.00078041	0.0025353
PP_3843		conserved protein of unknown function	15.6131	-1.52356	1.52356	0.0140118	0.0332961
PP_3648		Carboxymuconolactone decarboxylase family	19.9466	-1.52354	1.52354	0.00402988	0.0111084
PP_3056		putative Pyocin R2_PP, tail fiber protein	22.5699	1.52223	1.52223	0.000101088	0.000394129
PP_0570	yfhM	lipoprotein of unknown function	2822.34	-1.52009	1.52009	7.58621e-28	1.95483e-26
PP_3900		hypothetical protein	58.3934	-1.51973	1.51973	0.000175095	0.00065091
PP_1563		putative Phage terminase, large subunit	402.097	1.519	1.519	2.9746e-09	2.16345e-08
PP_2927		conserved protein of unknown function	115.826	-1.51865	1.51865	8.19569e-09	5.69053e-08
PP_3558		putative Amino acid transporter, periplasmic	475.068	-1.51761	1.51761	8.25752e-14	9.05044e-13
PP_4584	yajD	putative endonuclease	178.339	-1.51693	1.51693	1.35833e-06	7.09137e-06
PP_0580		MaoC domain protein	193.271	-1.51615	1.51615	3.63641e-08	2.30697e-07
PP_3829	modB	Molybdenum transport system permease protein	18.9196	1.51453	1.51453	6.55612e-05	0.000263631
PP_1330	ftsL	Cell division protein FtsL	45.9058	-1.51373	1.51373	0.000503738	0.00169336
PP_4867		branched-chain amino acid ABC transporter,	1878.07	1.51277	1.51277	8.26864e-07	4.46912e-06
PP_4207		conserved protein of unknown function	61.6808	-1.50851	1.50851	0.000112958	0.000436089
PP_0180		putative cytochrome c family protein	439.406	-1.50339	1.50339	1.01359e-07	6.11371e-07
PP_2709		putative Long-chain-fatty-acid--CoA ligase	77.4959	-1.49944	1.49944	1.18046e-06	6.23959e-06
PP_2200		conserved protein of unknown function	113.239	-1.49818	1.49818	4.83235e-08	3.01366e-07
PP_0167	paxB	Toxin secretion ATP-binding protein	1720.15	-1.49682	1.49682	2.37783e-45	1.29792e-43
PP_3797		conserved membrane protein of unknown function	342.387	-1.49179	1.49179	9.58891e-07	5.10931e-06
PP_3656		putative Aromatic compound-specific porin	120.904	-1.49135	1.49135	3.03046e-06	1.49972e-05
PP_3045		putative ClpP protease	33.1337	1.49123	1.49123	9.30891e-06	4.27667e-05
PP_0166		HlyD family secretion protein	1738.21	-1.48982	1.48982	2.19076e-29	6.32338e-28
PP_3290		Universal stress protein family	1111.91	-1.48746	1.48746	6.79567e-14	7.52299e-13
PP_1486	ydcS	polyamine ABC transporter, periplasmic	828.905	-1.48742	1.48742	2.77881e-09	2.02908e-08
PP_1003	arcD-II	arginine	422.456	-1.48623	1.48623	4.82975e-08	3.01366e-07
PP_2467	rpmI	50S ribosomal subunit protein L35	130.251	-1.48554	1.48554	0.000284206	0.00101282
PP_1222	tolB	component of the Tol biopolymer transport	1651.71	1.48472	1.48472	6.16547e-22	1.19264e-20
PP_5587		conserved protein of unknown function	1661.44	-1.48441	1.48441	1.21716e-21	2.31387e-20
PP_3828	modA	Molybdate-binding periplasmic protein	160.943	1.48431	1.48431	1.45261e-09	1.08956e-08
PP_0893		ThiJ	470.769	-1.48423	1.48423	2.56703e-17	3.67585e-16
PP_3652		Transporter, LysE family	142.941	-1.48215	1.48215	1.61359e-06	8.30601e-06
PP_1322		putative Lipoprotein	326.314	1.47796	1.47796	1.41902e-20	2.59041e-19
PP_2379		putative cytochrome oxidase biogenesis protein	329.953	1.47762	1.47762	1.75113e-16	2.3896e-15
PP_0613		Amidase family protein	118.65	1.47604	1.47604	1.13833e-05	5.16512e-05
PP_0311	dgcB	putative dimethylglycine dehydrogenase subunit	29.4573	1.47576	1.47576	1.9993e-06	1.01121e-05
PP_4434	dadA-I	D-amino acid dehydrogenase 1 small subunit	62.1027	1.47454	1.47454	3.17839e-07	1.78983e-06
PP_4384	flgH	Flagellar L-ring protein	323.432	-1.47347	1.47347	3.02257e-14	3.44999e-13
PP_0027		conserved membrane protein of unknown function	16.2768	-1.47334	1.47334	0.00277326	0.00801729
PP_0944	fumC-I	fumarate hydratase (class 2)	659.627	-1.47292	1.47292	0.00474617	0.0128389
PP_5238		conserved protein of unknown function	173.499	-1.47218	1.47218	5.52588e-14	6.16684e-13
PP_3042		putative Terminase, large subunit	50.1855	1.47066	1.47066	1.56968e-08	1.0502e-07
PP_1184		Dienelactone hydrolase family protein	737.416	-1.47009	1.47009	2.57163e-13	2.71078e-12
PP_1017	gtsC	mannose	1523.62	1.46727	1.46727	6.05435e-05	0.000244884
PP_1727		Transcriptional regulator, GntR family	28.5015	-1.46542	1.46542	0.000892454	0.00286719
PP_0728		conserved protein of unknown function	81.8314	-1.4651	1.4651	3.48299e-08	2.21985e-07
PP_5025	opgH	Glucans biosynthesis glucosyltransferase H	1140.36	1.46457	1.46457	9.55638e-33	3.21246e-31
PP_2947		putative Transcriptional regulator MvaT, P16	1154.25	-1.46398	1.46398	5.34226e-14	5.97401e-13
PP_3267		putative Clp protease	30.2778	1.46359	1.46359	5.26382e-06	2.50168e-05
PP_5232		conserved protein of unknown function	4345.97	-1.46357	1.46357	1.36326e-07	8.064e-07
PP_1586		putative Killer protein	116.293	-1.46354	1.46354	3.08768e-06	1.52394e-05
PP_4138	chrR	Chromate reductase	636.274	-1.46174	1.46174	2.11412e-12	2.07387e-11
PP_2247		putative Endoribonuclease	15.5623	-1.45956	1.45956	0.00828242	0.0209262
PP_1738		conserved exported protein of unknown function	292.899	1.45853	1.45853	1.12084e-19	1.90715e-18
PP_1696		putative Membrane protein	159.714	-1.45852	1.45852	2.49637e-07	1.43061e-06
PP_4405		Sensory box protein	324.907	-1.45828	1.45828	1.30951e-17	1.92003e-16
PP_1831		putative Membrane protein	18.9566	1.45472	1.45472	0.00107144	0.00338889
PP_0730		conserved protein of unknown function	106.61	-1.45327	1.45327	3.55661e-08	2.26415e-07
PP_1794		conserved hypothetical protein	23766.4	-1.45159	1.45159	1.15286e-31	3.73865e-30
PP_5046	glnA	glutamine synthetase	9533.6	1.45012	1.45012	1.19946e-11	1.1095e-10
PP_2697		putative oxidoreductase containing a flavin	15.2352	1.44961	1.44961	0.00643256	0.0167605
PP_3954		periplasmic binding subunit of unknown solute	355.26	-1.44839	1.44839	0.00387662	0.0107612
PP_1566		Peptidase U35	114.857	1.44747	1.44747	1.90453e-06	9.65046e-06
PP_4865	braE	High-affinity branched-chain amino acid	272.58	1.4456	1.4456	3.16611e-12	3.06224e-11
PP_5281	rpmG	50S ribosomal protein L33	36.4659	-1.44464	1.44464	0.00882909	0.0221249
PP_3622		putative Isoquinoline 1-oxidoreductase, beta	1294.85	-1.44309	1.44309	1.42428e-07	8.39791e-07
PP_1871	htpX	Protease HtpX	542.467	1.44262	1.44262	1.31864e-23	2.82865e-22
PP_5354		conserved protein of unknown function	316.909	-1.44257	1.44257	1.8825e-14	2.19878e-13
PP_3964		transposase	505.905	1.43787	1.43787	6.98467e-18	1.05209e-16
PP_3343	nikB	nickel ABC transporter permease subunit	42.655	1.43738	1.43738	4.04138e-05	0.000168789
PP_0026		putative cobalt	400.79	-1.43623	1.43623	2.93013e-16	3.94958e-15
PP_4373	fleQ	Transcriptional regulator FleQ	3228.82	-1.43304	1.43304	2.91204e-36	1.14672e-34
PP_0987	tdcG-II	L-serine dehydratase	207.842	-1.43277	1.43277	5.08044e-11	4.44579e-10
PP_5432		conserved protein of unknown function	43.8756	-1.431	1.431	0.000889136	0.00285986
PP_2938		conserved protein of unknown function	311.088	-1.43087	1.43087	2.40683e-10	1.98339e-09
PP_3011		conserved protein of unknown function	64.5831	-1.42867	1.42867	1.54905e-05	6.87038e-05
PP_3512		conserved membrane protein of unknown function	23.307	-1.42579	1.42579	0.00265181	0.00769848
PP_2201		Hydrolase, alpha	148.727	1.42556	1.42556	6.53015e-11	5.6694e-10
PP_4618		conserved protein of unknown function	202.728	-1.42507	1.42507	1.54469e-05	6.85656e-05
PP_4495	aroP-II	aromatic amino acid transport protein	505.185	1.42378	1.42378	3.1792e-08	2.04276e-07
PP_5250	opdB	proline-specific outer membrane porin D	28.1088	-1.42376	1.42376	0.000423419	0.00145803
PP_2414		conserved exported protein of unknown function	46.224	1.42231	1.42231	3.51701e-05	0.000147897
PP_0904		InaA protein	73.5749	1.42165	1.42165	0.000303856	0.0010752
PP_4799		putative Muramoyltetrapeptide carboxypeptidase	121.004	-1.42035	1.42035	1.44831e-07	8.52139e-07
PP_5175		HlyD family secretion protein	380.955	-1.41937	1.41937	6.15639e-14	6.84278e-13
PP_3633		putative ArgC like	10.6954	1.41876	1.41876	0.0208121	0.046908
PP_4366	fliI	flagellum-specific ATP synthase	762.641	-1.4185	1.4185	2.61795e-20	4.65573e-19
PP_4687	hmuV	Hemin import ATP-binding protein HmuV	67.908	-1.41449	1.41449	5.32003e-05	0.000218062
PP_2714		Sensor histidine kinase	198.843	-1.41325	1.41325	3.10314e-10	2.53206e-09
PP_5380	copA-II	copper resistance protein A	1273.98	1.41086	1.41086	3.22642e-12	3.11511e-11
PP_4975		Long-chain acyl-CoA thioester hydrolase family	577.879	-1.41061	1.41061	1.83265e-18	2.86215e-17
PP_1569		conserved protein of unknown function	40.8879	1.40939	1.40939	0.00547896	0.0145444
PP_3292		conserved membrane protein of unknown function	196.624	-1.40897	1.40897	1.8787e-08	1.2445e-07
PP_4448		conserved protein of unknown function	15828.1	-1.40809	1.40809	2.82199e-12	2.7342e-11
PP_5536		conserved protein of unknown function with RHS	225.128	-1.40743	1.40743	3.50818e-13	3.66299e-12
PP_5211		ChaC-related protein	757.326	-1.40618	1.40618	1.36022e-12	1.34389e-11
PP_5092		putative exported NLP	254.292	-1.40369	1.40369	3.86524e-08	2.4409e-07
PP_4770		conserved protein of unknown function	265.76	1.4029	1.4029	8.43245e-22	1.61417e-20
PP_2713		DNA-binding response regulator	202.997	-1.40267	1.40267	7.67825e-12	7.17461e-11
PP_4815		putative Membrane protein	367.495	-1.40239	1.40239	8.13878e-18	1.21597e-16
PP_3754	bktB	Beta-ketothiolase BktB	404.723	-1.40237	1.40237	8.87511e-08	5.4005e-07
PP_0362	bioB	Biotin synthase	1518.82	-1.40133	1.40133	2.7674e-12	2.68604e-11
PP_0007	yidD	conserved hypothetical protein	62.0595	1.40093	1.40093	3.97786e-07	2.21739e-06
PP_4704		conserved protein of unknown function	1545.91	-1.40062	1.40062	3.03283e-20	5.37621e-19
PP_1123		conserved protein of unknown function	23.7574	-1.39967	1.39967	0.000773617	0.00251471
PP_0100	cynT	carbonic anhydrase	1151.37	1.39908	1.39908	3.60623e-14	4.07401e-13
PP_0922		conserved protein of unknown function	122.1	-1.39837	1.39837	2.51718e-07	1.44104e-06
PP_1153		putative lipoprotein	173.856	-1.39642	1.39642	2.68491e-05	0.000115011
PP_3836		conserved protein of unknown function	22.2169	-1.39464	1.39464	0.0128127	0.0308456
PP_0159		putative CoA-transferase family III	311.169	-1.3941	1.3941	3.67733e-18	5.64711e-17
PP_5277		Major facilitator family transporter	29.6465	1.39121	1.39121	6.89465e-05	0.000277042
PP_3501		transposase	221.505	1.39005	1.39005	5.40921e-18	8.21515e-17
PP_0396		conserved protein of unknown function	4223.11	-1.38887	1.38887	3.24417e-09	2.33793e-08
PP_1014	yihS	aldose-ketose isomerase	6378.08	-1.38561	1.38561	3.95304e-36	1.54561e-34
PP_1683		Transcriptional regulator, MarR family	129.91	-1.3805	1.3805	0.000184705	0.000684329
PP_5493		protein of unknown function	23.6821	-1.38025	1.38025	0.00347597	0.00979158
PP_1374		conserved protein of unknown function	43.0146	-1.37903	1.37903	0.000957614	0.0030587
PP_3325		putative Outer membrane ferric siderophore	176.751	1.37676	1.37676	0.000710358	0.00232554
PP_4281	guaD	guanine deaminase	276.804	-1.37305	1.37305	9.0005e-06	4.15576e-05
PP_5112		putative processin peptidase	363.47	1.37199	1.37199	2.22796e-15	2.8107e-14
PP_0005	trmE	GTPase	597.632	-1.37079	1.37079	1.94364e-14	2.26539e-13
PP_4367	fliH	Flagellar assembly protein FliH	435.546	-1.36984	1.36984	9.8631e-20	1.69393e-18
PP_5320	phoB	two-component system DNA-binding transcriptional	310.026	-1.36907	1.36907	1.5264e-13	1.63721e-12
PP_1034	cumA	multicopper oxidase	769.063	-1.36852	1.36852	4.85757e-13	4.99622e-12
PP_4427		Amino acid ABC transporter, permease protein	43.2584	1.36554	1.36554	1.61517e-05	7.13495e-05
PP_2174		conserved protein of unknown function	20.2164	-1.36482	1.36482	0.00288757	0.00830854
PP_4016	purB	5'-phosphoribosyl-4-(N-succinocarboxamide)-5-	1801.6	1.36463	1.36463	3.77187e-13	3.92346e-12
PP_5678		protein of unknown function	16.1504	-1.3638	1.3638	0.0133683	0.0320059
PP_4604		putative permease of the drug	228.835	1.36334	1.36334	0.000304948	0.00107837
PP_2196	speB	agmatinase	180.805	-1.36297	1.36297	7.78283e-11	6.70418e-10
PP_2984		conserved protein of unknown function	140.794	-1.36293	1.36293	3.80006e-06	1.8556e-05
PP_1190		conserved protein of unknown function	233.067	-1.36232	1.36232	4.93507e-08	3.07077e-07
PP_2794		Oxidoreductase, short chain	11.6983	-1.3575	1.3575	0.02013	0.0456131
PP_0256		putative oxidoreductase	500.13	-1.35724	1.35724	1.90014e-19	3.19374e-18
PP_5621		protein of unknown function	409.18	-1.35717	1.35717	1.78408e-11	1.62573e-10
PP_2088		RNA polymerase sigma factor SigX	882.455	1.35676	1.35676	2.28705e-11	2.06203e-10
PP_4340	cheY	response regulator for chemotactic signal	403.85	-1.35649	1.35649	7.06122e-12	6.6205e-11
PP_2151	sthA	soluble pyridine nucleotide transhydrogenase	1848.55	1.35503	1.35503	3.66983e-07	2.05398e-06
PP_5635		conserved protein of unknown function	37.1584	-1.35494	1.35494	7.81196e-05	0.000309392
PP_4432		putative Xaa-Pro aminopeptidase	368.457	1.35355	1.35355	3.15796e-18	4.8767e-17
PP_3263	ybhN	phospholipid modification enzyme	14.0096	1.35266	1.35266	0.00583196	0.0153569
PP_1372		conserved protein of unknown function	636.889	-1.35216	1.35216	1.04458e-12	1.03949e-11
PP_1579		conserved protein of unknown function	533.417	1.35075	1.35075	3.4287e-06	1.68021e-05
PP_5462		conserved protein of unknown function	23.3882	-1.34887	1.34887	0.0069873	0.0180257
PP_5072	ynfM	efflux transporter	222.794	-1.34725	1.34725	4.64994e-06	2.2272e-05
PP_2956		Ribosomal protein S6 modification	162.761	-1.34333	1.34333	2.43746e-08	1.59973e-07
PP_5196	fbpA	putative iron(III)|iron ABC transporter,	598.892	1.34327	1.34327	4.28674e-09	3.04547e-08
PP_5450		exported protein of unknown function	136.523	-1.33759	1.33759	8.70622e-10	6.72233e-09
PP_3837	yphA	inner membrane protein of unknown function	77.9606	-1.33728	1.33728	5.81504e-07	3.18671e-06
PP_0813	cyoB	cytochrome bo terminal oxidase subunit I	17001.5	1.33697	1.33697	2.21908e-09	1.63335e-08
PP_5208	yhhJ	putative translation related protein	591.992	-1.33584	1.33584	7.11871e-10	5.56673e-09
PP_1491		CheW domain protein	85.383	-1.33499	1.33499	0.000152009	0.000572421
PP_5278	kauB	4-guanidinobutyraldehyde dehydrogenase	887.009	1.33258	1.33258	5.05799e-09	3.58415e-08
PP_2331		conserved membrane protein of unknown function	937.083	1.33226	1.33226	2.5213e-22	5.01802e-21
PP_4624		putative hydrolase, alpha	69.0767	-1.33182	1.33182	7.30709e-05	0.000290695
PP_0802		putative chemotaxis protein	250.277	-1.33139	1.33139	5.07052e-09	3.58841e-08
PP_0809	dsbB	disulfide bond formation protein B	59.789	1.32964	1.32964	4.06291e-08	2.55986e-07
PP_2437		putative Acyl-CoA dehydrogenase	205.589	-1.32921	1.32921	1.12279e-10	9.46475e-10
PP_4439		transposase	217.153	1.32843	1.32843	4.31193e-18	6.58495e-17
PP_3755	hbd	3-hydroxybutyryl-CoA dehydrogenase	286.339	-1.32801	1.32801	2.10148e-05	9.15125e-05
PP_1012	gltR-II	DNA-binding response regulator	465.258	1.32773	1.32773	2.18888e-07	1.26359e-06
PP_0053		putative sulfide:quinone oxidoreductase	227.014	-1.32751	1.32751	3.15229e-07	1.77877e-06
PP_3531		conserved exported protein of unknown function	72.8208	-1.32615	1.32615	1.44106e-05	6.43284e-05
PP_2435	iscS-II	cysteine desulfurase	47.5888	-1.32601	1.32601	0.00050225	0.00169042
PP_2388		Transporter, LysE family	769.986	-1.32351	1.32351	7.2322e-13	7.30241e-12
PP_2064		Multidrug efflux RND membrane fusion protein	31.3537	-1.32311	1.32311	0.00228074	0.00672392
PP_5395		conserved protein of unknown function	8771.6	-1.3231	1.3231	1.79102e-45	9.87392e-44
PP_2179	spuA	glutamine amidotransferase	13.1936	1.31854	1.31854	0.00477675	0.0129089
PP_4245	pvdY	hydroxyproline acetylase	651.779	-1.31691	1.31691	5.30886e-09	3.75228e-08
PP_3981		transposase	227.422	1.31393	1.31393	1.72417e-21	3.25526e-20
PP_3802		putative Cation ABC transporter, ATP-binding	137.595	-1.31213	1.31213	0.000320306	0.00112618
PP_0581		3-oxoacyl-(Acyl-carrier-protein) reductase	672.974	-1.31187	1.31187	1.26391e-13	1.36358e-12
PP_2450		conserved protein of unknown function	106.392	-1.31113	1.31113	0.000105626	0.000409218
PP_4763		GCN5-related N-acetyltransferase	22.2106	-1.30991	1.30991	0.0100658	0.0248625
PP_1494		Response regulator	739.282	-1.30925	1.30925	1.21352e-11	1.12063e-10
PP_4642		Cyclic diguanosine monophosphate-binding	255.932	-1.30896	1.30896	9.65316e-07	5.13686e-06
PP_0648		conserved protein of unknown function	136.374	-1.30704	1.30704	1.12556e-07	6.7375e-07
PP_1695		putative Sodium-solute symporter	712.533	-1.30638	1.30638	3.58936e-10	2.90575e-09
PP_0481	katA	Catalase	3739.89	-1.3045	1.3045	1.21249e-09	9.20721e-09
PP_1573		putative Major tail protein	118.771	1.30429	1.30429	0.000424974	0.00146247
PP_0808	hmp	Flavohemoprotein	194.028	-1.30375	1.30375	1.87833e-06	9.5352e-06
PP_4966	sahR	transcriptional regulator of methionine	1401.4	-1.30299	1.30299	2.787e-06	1.38922e-05
PP_3425		Efflux transporter RND family, MFP subunit	36.104	-1.30217	1.30217	0.000253621	0.000912077
PP_4570		conserved protein of unknown function	1900.67	-1.30184	1.30184	1.9173e-26	4.55606e-25
PP_1094		putative electron transport complex protein	57.7201	-1.30181	1.30181	2.85026e-05	0.000121527
PP_4544		conserved exported protein of unknown function	45.6596	-1.30031	1.30031	8.52297e-05	0.000335144
PP_2807		conserved protein of unknown function	15.9591	1.30026	1.30026	0.00695651	0.0179631
PP_3342	nikA	nickel ABC transporter periplasmic binding	274.046	1.30011	1.30011	7.18291e-07	3.90912e-06
PP_2652		putative Hydratase	111.382	-1.29968	1.29968	2.05055e-07	1.19248e-06
PP_3235		conserved protein of unknown function	223.15	-1.29815	1.29815	8.76063e-05	0.000343754
PP_3688		conserved protein of unknown function	140.537	-1.29704	1.29704	4.10211e-06	1.989e-05
PP_2216	acd	short-chain acyl-CoA dehydrogenase	124.905	1.29626	1.29626	2.72264e-08	1.77422e-07
PP_1583		putative Structural protein P5	61.2062	1.29477	1.29477	0.000252582	0.000908932
PP_2698	metE	5-methyltetrahydropteroyltriglutamate-	140.986	1.29321	1.29321	0.000193888	0.000714988
PP_3356	fcs	feruloyl-CoA-synthetase	39.7185	1.29162	1.29162	0.00236305	0.00693795
PP_4773		conserved protein of unknown function	144.817	1.29111	1.29111	5.78724e-16	7.56043e-15
PP_3291		Metallo-beta-lactamase family protein	1004.31	-1.29007	1.29007	1.29693e-10	1.08333e-09
PP_3365		Acetolactate synthase	1605.6	1.28999	1.28999	3.53442e-14	4.00108e-13
PP_1010	edd	phosphogluconate dehydratase	3299.84	1.28929	1.28929	2.38071e-10	1.9648e-09
PP_4233		putative Oxidoreductase, small subunit	30.9256	1.28926	1.28926	0.00378243	0.0105316
PP_1963		conserved protein of unknown function	853.142	1.28873	1.28873	1.3293e-06	6.9596e-06
PP_3992	xanP	xanthine permease	72.9841	1.28868	1.28868	2.31316e-06	1.16248e-05
PP_5148		conserved membrane protein of unknown function	206.159	-1.28769	1.28769	1.35153e-05	6.06262e-05
PP_1734	minC	Probable septum site-determining protein MinC	511.837	1.28685	1.28685	1.06685e-09	8.16883e-09
PP_4635		trans-2-enoyl-CoA reductase (NAD(+))	2700.96	1.28666	1.28666	6.96168e-22	1.34195e-20
PP_4705		Glyoxalase	17.2511	-1.28631	1.28631	0.00773404	0.0197034
PP_1487		conserved protein of unknown function	256.635	1.28583	1.28583	1.35476e-06	7.08613e-06
PP_4058	glgB	1,4-alpha-glucan branching enzyme	2284.08	-1.2835	1.2835	1.80076e-07	1.05277e-06
PP_5740		protein of unknown function	20.5508	-1.28306	1.28306	0.00513481	0.0137419
PP_4337	cheBA	chemotaxis response regulator protein-glutamate	1436.21	-1.28108	1.28108	1.24767e-23	2.68687e-22
PP_5001	hslU	protease HslVU, ATPase component	1726.42	1.27946	1.27946	5.94792e-15	7.20679e-14
PP_1102		conserved protein of unknown function	24.5516	-1.2772	1.2772	0.00372824	0.0104123
PP_5666		putative microcin B17-like processing protein,	47.2319	-1.27708	1.27708	0.000268601	0.000960934
PP_2256		Transcriptional regulator, Cro	89.6988	-1.2766	1.2766	0.000168788	0.000630045
PP_5332		conserved protein of unknown function	406.449	1.27598	1.27598	4.73193e-19	7.76402e-18
PP_5080	pilQ	type 4 pili biogenesis protein	254.38	-1.27588	1.27588	4.83363e-15	5.93492e-14
PP_0049		conserved protein of unknown function	889.649	-1.27551	1.27551	2.13049e-07	1.23376e-06
PP_0496		Sodium	116.484	-1.27414	1.27414	6.09775e-05	0.000246458
PP_3729		Periplasmic amino acid-binding protein-related	22.2421	1.27261	1.27261	0.00853528	0.0215158
PP_4464		Transcriptional regulator, LysR family	11.1888	1.27136	1.27136	0.0200064	0.0453516
PP_0777		Glutathione peroxidase	198.336	-1.26902	1.26902	3.05251e-07	1.726e-06
PP_1530	dapD	2,3,4,5-tetrahydropyridine-2,6-dicarboxylate	929.677	1.26558	1.26558	1.12932e-27	2.86911e-26
PP_2173		Transcriptional regulator, AraC family	109.367	-1.26482	1.26482	8.59907e-09	5.95561e-08
PP_4380	flgL	Flagellar hook-associated protein FlgL	2014.24	-1.26471	1.26471	1.59037e-16	2.17562e-15
PP_3955		permease	187.376	-1.26356	1.26356	0.00331212	0.00938803
PP_3630	opdT-II	tyrosine-specific outer membrane porin D	104.712	-1.26341	1.26341	1.25714e-09	9.53316e-09
PP_5284		UPF0758 protein PP_5284	133.937	-1.26319	1.26319	7.33177e-07	3.97835e-06
PP_3733		putative ABC transporter lipoprotein	40.9235	-1.26241	1.26241	0.00100443	0.00319712
PP_2198	yliI	aldose sugar dehydrogenase	190.752	1.26158	1.26158	9.71117e-08	5.88326e-07
PP_5732		putative metal-binding protein	258.347	1.26149	1.26149	2.83913e-08	1.8436e-07
PP_0785	cysZ	putative cysZ protein, required for sulfate	164.583	1.2614	1.2614	2.18734e-15	2.76578e-14
PP_4401	bkdAA	branched-chain alpha-keto acid dehydrogenase	152.958	1.261	1.261	0.000670279	0.00221405
PP_0812	cyoA	cytochrome bo terminal oxidase subunit II	5984.1	1.25975	1.25975	9.84322e-11	8.38727e-10
PP_4333		CheW domain protein	335.298	-1.25974	1.25974	7.20207e-15	8.65033e-14
PP_4509		conserved protein of unknown function	23.7861	-1.25959	1.25959	0.0128844	0.0309642
PP_4515		Transcriptional regulator, MarR family	267.035	-1.25773	1.25773	2.92936e-07	1.66319e-06
PP_1493	cheBC	chemotaxis response regulator protein-glutamate	365.748	-1.25755	1.25755	2.70689e-10	2.21872e-09
PP_4113		conserved exported protein of unknown function	74.8948	1.25753	1.25753	2.82292e-08	1.83523e-07
PP_4423		conserved protein of unknown function	94.2576	1.25617	1.25617	1.23072e-06	6.4837e-06
PP_2137	pcaF-II	beta-ketoadipyl CoA thiolase, beta component	800.718	1.25573	1.25573	2.5224e-25	5.69917e-24
PP_3528		putative ABC transporter, periplasmic	70.2559	1.25567	1.25567	4.32225e-05	0.000179702
PP_5707		conserved protein of unknown function	14.0917	1.25368	1.25368	0.00768767	0.0196213
PP_0268	oprQ	outer-membrane porin D	4991.7	-1.25083	1.25083	4.31334e-16	5.70251e-15
PP_0174		conserved protein of unknown function	150.729	-1.2501	1.2501	3.02856e-08	1.9528e-07
PP_4218		Lipase	120.526	-1.25006	1.25006	0.00244097	0.00714283
PP_4047		conserved protein of unknown function	320.422	-1.24781	1.24781	1.05158e-11	9.75988e-11
PP_5624		conserved protein of unknown function	714.982	-1.24759	1.24759	3.09891e-09	2.24498e-08
PP_1716		Transcriptional regulator, Cro	812.819	-1.24641	1.24641	5.12349e-05	0.000210632
PP_1020	yeaD	putative glucose-6-phosphate 1-epimerase	2478.42	1.24619	1.24619	2.51343e-06	1.26083e-05
PP_1009	gapA	glyceraldehyde-3-phosphate dehydrogenase	3251.81	1.24599	1.24599	1.51705e-05	6.74477e-05
PP_2671		Sensor histidine kinase	39.4674	-1.24593	1.24593	0.00137535	0.00425732
PP_2901	pvdQ	Acyl-homoserine lactone acylase	306.612	-1.24563	1.24563	0.000322674	0.00113378
PP_4035	pydP	putative PydP transporter, NCS1 nucleoside	1201.93	-1.24471	1.24471	4.15208e-06	2.01146e-05
PP_0158	gcdH	glutaryl-CoA dehydrogenase	384.871	-1.24258	1.24258	9.81722e-08	5.94098e-07
PP_1244		conserved protein of unknown function	20.7542	1.24107	1.24107	0.001363	0.00422146
PP_3063	gpU	Pyocin R2_PP, tail formation protein	14.3691	1.23806	1.23806	0.00416344	0.0114194
PP_4866	braD	High-affinity branched-chain amino acid	217.891	1.23734	1.23734	0.00031569	0.00111208
PP_0928		K+-dependent Na+	40.8775	1.23421	1.23421	6.33807e-05	0.000255609
PP_3948	nicB	nicotinate dehydrogenase subunit B	20.3534	1.23394	1.23394	0.00659717	0.0171154
PP_4335		flagellar motor protein	439.808	-1.23394	1.23394	3.48506e-13	3.64576e-12
PP_2648		Universal stress protein family	5330.22	-1.23371	1.23371	1.41049e-05	6.30659e-05
PP_0864	speC	ornithine decarboxylase	1357.61	1.23155	1.23155	7.18167e-10	5.60042e-09
PP_1953		Oxidoreductase, short chain	24.7212	1.23128	1.23128	0.00334917	0.0094687
PP_1623	rpoS	RNA polymerase, sigma S (sigma 38) factor	9856.51	-1.23045	1.23045	4.54861e-08	2.84917e-07
PP_5312		conserved exported protein of unknown function	58.0611	1.23	1.23	2.76275e-05	0.00011807
PP_4341	fliA	RNA polymerase sigma 28 (sigma F) factor for	1135.21	-1.22982	1.22982	7.87811e-13	7.89674e-12
PP_1651		two-component response regulator	137.903	-1.22831	1.22831	0.00546164	0.0145169
PP_3268		MutT/nudix family protein	20.9446	-1.22751	1.22751	0.0192774	0.0439491
PP_4540		Hydrolase, alpha	316.007	-1.22531	1.22531	3.26712e-06	1.60818e-05
PP_2065		Multidrug efflux RND transporter	113.631	-1.2245	1.2245	1.08789e-08	7.45039e-08
PP_2112	acnA-I	aconitate hydratase 1	2716.48	-1.22342	1.22342	4.05126e-05	0.000169073
PP_2121		putative Lipoprotein	451.13	-1.22337	1.22337	0.0172071	0.0399386
PP_5495		protein of unknown function	793.929	-1.22227	1.22227	3.49416e-09	2.51151e-08
PP_3305		Membrane protein, TerC family	26.555	1.22174	1.22174	0.00239721	0.00702596
PP_0817	alaC	aminotransferase	1564.21	1.2181	1.2181	1.01759e-10	8.64406e-10
PP_5360		conserved protein of unknown function	53.1437	1.21685	1.21685	0.000143521	0.000543801
PP_1356		conserved protein of unknown function	88.3561	-1.21678	1.21678	0.000165314	0.000618721
PP_0417	trpE	Anthranilate synthase component 1	2236.61	1.21601	1.21601	2.20448e-21	4.14789e-20
PP_0204		Transcriptional regulator, GntR family	69.0639	1.21471	1.21471	1.18535e-05	5.3652e-05
PP_3602		2,5-dioxovalerate dehydrogenase	150.712	1.21468	1.21468	5.22499e-08	3.24385e-07
PP_1323	diaA	factor modulating bacterial replication	209.741	1.2146	1.2146	1.02453e-09	7.86661e-09
PP_1883		protein of unknown function	59.4621	-1.21051	1.21051	3.44545e-05	0.000145109
PP_2346		conserved exported protein of unknown function	46.2584	1.20994	1.20994	2.19135e-05	9.51255e-05
PP_3968		Sensor histidine kinase	859.075	-1.20943	1.20943	3.68727e-12	3.53529e-11
PP_4336		flagellar motor rotation protein	321.731	-1.20905	1.20905	1.48517e-11	1.36235e-10
PP_1218		putative acyl-CoA thioesterase	185.9	1.20813	1.20813	2.94064e-07	1.66788e-06
PP_3130		conserved exported protein of unknown function	737.47	-1.20802	1.20802	9.14699e-08	5.55368e-07
PP_2831	fucD	L-fuconate dehydratase	17.878	1.20784	1.20784	0.00515974	0.0138019
PP_2875		conserved protein of unknown function	2388.49	-1.20587	1.20587	1.06784e-07	6.41284e-07
PP_2189		conserved protein of unknown function	770.403	-1.20515	1.20515	1.63414e-06	8.40393e-06
PP_4807	mrdA-II	transpeptidase (penicillin-binding protein 2)	390.49	1.20494	1.20494	1.54868e-14	1.82044e-13
PP_5591		conserved protein of unknown function	586.66	-1.20483	1.20483	2.62829e-06	1.31367e-05
PP_4812		putative 3-methyladenine DNA glycosylase	165.356	1.2033	1.2033	1.45208e-08	9.76258e-08
PP_3756		TetR family transcriptional regulator	89.5502	-1.20237	1.20237	1.0842e-07	6.504e-07
PP_1844	plsC	1-acyl-sn-glycerol-3-phosphate acyltransferase	54.8387	1.20189	1.20189	6.65699e-06	3.1314e-05
PP_1276		conserved protein of unknown function	30.4093	-1.20032	1.20032	0.000956338	0.0030564
PP_1955		Cytochrome P450 family protein	32.2118	1.19984	1.19984	0.00148376	0.00457236
PP_2887		Catalase-related peroxidase	20.0808	1.19897	1.19897	0.00522115	0.0139501
PP_2141		conserved protein of unknown function	25.3055	-1.19894	1.19894	0.0144489	0.0341727
PP_2214	fadBA	3-hydroxyacyl-CoA dehydrogenase type-2	46.361	1.19749	1.19749	0.000485121	0.00163676
PP_2743		Acetyltransferase, GNAT family	43.6284	-1.19472	1.19472	0.000684937	0.00225571
PP_5152		conserved exported protein of unknown function	150.01	1.19392	1.19392	8.04508e-08	4.92259e-07
PP_3822		Cytochrome c family protein	1193.19	1.19322	1.19322	0.010514	0.0258767
PP_2167		putative PhoD-like phosphatase	146.124	1.19268	1.19268	1.38091e-08	9.31817e-08
PP_2375	metH	cobalamin-dependent methionine synthase	2728.1	1.1908	1.1908	1.25085e-10	1.04802e-09
PP_5724		conserved protein of unknown function	64.0472	-1.19005	1.19005	0.00196777	0.00587985
PP_5268	puuR	DNA-binding transcriptional repressor	86.1863	1.18881	1.18881	2.08967e-07	1.2114e-06
PP_2154	lolC	LolC	312.959	1.18869	1.18869	1.6623e-10	1.38316e-09
PP_5157		conserved exported protein of unknown function	186.448	1.18632	1.18632	5.20622e-15	6.36405e-14
PP_1483	ydcU	polyamine ABC transporter, permease protein	46.1063	-1.18609	1.18609	0.00224761	0.00663629
PP_1567		Capsid protein	706.674	1.18604	1.18604	9.68281e-06	4.43735e-05
PP_2129		conserved protein of unknown function	666.591	-1.18524	1.18524	2.467e-24	5.46209e-23
PP_5077		conserved protein of unknown function	2582.11	1.1835	1.1835	8.83855e-34	3.10362e-32
PP_4252	ccoQ-I	cytochrome c oxidase subunit, cbb3-type	128.218	-1.18288	1.18288	0.0070943	0.01826
PP_1868	deaD	ATP-dependent DEAD-box RNA helicase DeaD	1025.57	1.18146	1.18146	8.34156e-09	5.78453e-08
PP_4145	mltD	Membrane-bound lytic murein transglycosylase D	1332.6	1.17946	1.17946	1.11657e-09	8.50227e-09
PP_1630	recX	Regulatory protein RecX	48.4017	1.17933	1.17933	0.000969843	0.00309418
PP_4033	rnz	Ribonuclease Z	51.494	1.17894	1.17894	0.000145617	0.000550608
PP_4279	xdhB	xanthine dehydrogenase subunit XdhB	813.902	1.17811	1.17811	2.04745e-05	8.93715e-05
PP_1253		Transcriptional regulator, ArsR family	56.972	-1.17781	1.17781	0.00341454	0.00963869
PP_3132		putative Polysaccharide transporter	315.459	-1.1777	1.1777	5.30784e-12	5.04519e-11
PP_2254		Transcriptional regulator, GntR family	64.804	1.17692	1.17692	4.41641e-06	2.12644e-05
PP_2293		DNA maturase B	12.9452	1.17602	1.17602	0.0109404	0.0267708
PP_5696		conserved protein of unknown function	123.536	-1.175	1.175	4.44439e-06	2.137e-05
PP_1090	bvgA	putative Virulence factors positive	187.792	-1.17431	1.17431	3.49365e-09	2.51151e-08
PP_1934		conserved protein of unknown function	236.98	-1.17272	1.17272	1.09974e-08	7.52214e-08
PP_5481		conserved protein of unknown function	59.7238	1.17244	1.17244	6.84873e-06	3.21337e-05
PP_2178	puuA-I	glutamate-putrescine ligase	18.8431	1.17046	1.17046	0.00579405	0.0152762
PP_2405		conserved exported protein of unknown function	29.3083	-1.16908	1.16908	0.00454232	0.0123663
PP_5289	argB	Acetylglutamate kinase	1318.23	1.16757	1.16757	1.32495e-25	3.03088e-24
PP_0814	cyoC	cytochrome bo terminal oxidase subunit III	1485.8	1.16738	1.16738	3.34514e-08	2.13942e-07
PP_3618		conserved protein of unknown function	18.8057	-1.16529	1.16529	0.0149834	0.0353459
PP_2413		GGDEF family protein	136.413	-1.16519	1.16519	2.5638e-05	0.000110337
PP_1383	galP-II	porin-like protein	86.0997	-1.16507	1.16507	0.000810046	0.00262693
PP_2476	curA	NADPH-dependent curcumin	112.211	1.1647	1.1647	1.53519e-07	9.02295e-07
PP_3122	atoA	acetoacetyl CoA-transferase (subunit A)	22.8868	1.16468	1.16468	0.00388471	0.0107783
PP_1234		putative permease	93.623	1.16465	1.16465	2.61648e-07	1.49324e-06
PP_1737		conserved protein of unknown function	146.288	1.16388	1.16388	7.69207e-10	5.9896e-09
PP_4525		Transcriptional regulator, LysR family	119.838	-1.16376	1.16376	2.01587e-06	1.01865e-05
PP_3346	nikE	Nickel transporter ATP-binding protein	34.3934	1.16211	1.16211	0.00030706	0.00108445
PP_2213		putative acyl-CoA synthetase	167.253	1.15983	1.15983	7.40818e-06	3.4582e-05
PP_4426		Amino acid ABC transporter, permease protein	57.0841	1.15955	1.15955	0.00289673	0.00831753
PP_4821		putative Fis-like DNA-binding protein	249.749	-1.15928	1.15928	1.65146e-07	9.67532e-07
PP_3121		transcriptional regulator, LysR family	96.1054	1.15865	1.15865	1.15521e-06	6.11785e-06
PP_5004	phaB	Poly(3-hydroxyalkanoate) depolymerase	416.099	-1.15751	1.15751	4.83149e-11	4.23465e-10
PP_2330		conserved protein of unknown function	475.669	1.1573	1.1573	2.33965e-10	1.93381e-09
PP_5219		conserved membrane protein of unknown function	41.1524	1.15702	1.15702	0.000447369	0.00152715
PP_4342		flagellar synthesis regulator, putative ATPase	611.265	-1.15592	1.15592	1.65972e-20	3.01982e-19
PP_1520	plsB	glycerol-3-phosphate acyltransferase	280.979	1.15502	1.15502	9.12537e-09	6.30428e-08
PP_2180	spuC-I	polyamine:pyruvate transaminase	99.28	1.15236	1.15236	1.76438e-06	9.00952e-06
PP_1723		putative 2-aminoethylphosphonate transport	94.1969	-1.15017	1.15017	3.29219e-06	1.61763e-05
PP_0006	oxaA	probable membrane protein insertase	2790.95	1.1491	1.1491	2.06094e-09	1.51966e-08
PP_5210		Alcohol dehydrogenase, zinc-containing	193.337	-1.14789	1.14789	5.84023e-09	4.11203e-08
PP_1724		putative ABC-type 2-aminoethylphosphonate	87.2495	-1.14698	1.14698	2.76847e-05	0.000118223
PP_5116		conserved protein of unknown function	20.8817	1.14654	1.14654	0.00531899	0.0141728
PP_1271		putative Multidrug efflux MFS transporter	38.8819	-1.14652	1.14652	0.00068207	0.00224761
PP_0621		conserved protein of unknown function	51.0543	-1.14584	1.14584	0.00643302	0.0167605
PP_4589		D-isomer specific 2-hydroxyacid dehydrogenase	131.72	1.14462	1.14462	1.0297e-08	7.06938e-08
PP_0491	fdoI	formate dehydrogenase-O, gamma subunit	150.595	-1.14405	1.14405	2.58375e-06	1.29258e-05
PP_3142		putative Sugar transferase	515.011	-1.14194	1.14194	5.77895e-08	3.57167e-07
PP_4677		CDP-diacylglycerol--serine	487.432	1.1414	1.1414	1.67238e-14	1.96167e-13
PP_3812		putative Lipase	45.1899	-1.14033	1.14033	0.000137494	0.0005224
PP_4675	msrQ	methionine sulfoxide reductase heme-binding	26.5319	1.13992	1.13992	0.000889772	0.00286024
PP_1733	minD	membrane ATPase of the MinC-MinD-MinE system	2178.62	1.13982	1.13982	9.66841e-16	1.24829e-14
PP_4446		putative Group II intron-encoding maturase	110.889	-1.13946	1.13946	3.77624e-07	2.1114e-06
PP_4562		conserved protein of unknown function	81.6003	1.1392	1.1392	1.92095e-05	8.4116e-05
PP_1119		conserved protein of unknown function	103.905	-1.13917	1.13917	4.68414e-05	0.000193871
PP_5071	ynfL	putative DNA-binding transcriptional regulator	42.3626	1.13852	1.13852	3.86618e-05	0.000161716
PP_1130		conserved protein of unknown function	415.722	-1.13839	1.13839	4.11633e-08	2.59056e-07
PP_4189	sucA	2-oxoglutarate decarboxylase, thiamine-requiring	27537	1.1376	1.1376	3.51334e-09	2.52201e-08
PP_2398		conserved protein of unknown function, UPF0276	22.0543	-1.13714	1.13714	0.0190236	0.0434311
PP_4404	lpdV	dihydrolipoyl dehydrogenase component of	188.106	1.13616	1.13616	0.000724398	0.00236728
PP_1373	pitB	phosphate transporter	770.025	1.13606	1.13606	1.65487e-06	8.50262e-06
PP_5096		putative factor involved in shape determination	359.38	1.13603	1.13603	1.47236e-17	2.14738e-16
PP_4140	ldcC	lysine decarboxylase	450.262	-1.13573	1.13573	3.71785e-10	3.00536e-09
PP_1392		putative NAD-binding protein	76.571	-1.1356	1.1356	0.000454974	0.00155023
PP_1136		conserved protein of unknown function	85.1686	-1.13537	1.13537	0.000121953	0.000467543
PP_2304		putative Peptidyl-prolyl cis-trans isomerase D	2581.3	1.13423	1.13423	1.47789e-18	2.33456e-17
PP_0423		conserved protein of unknown function	76.4633	1.13266	1.13266	2.55378e-07	1.46048e-06
PP_5603		putative FAD dependent oxidoreductase	103.345	1.13209	1.13209	1.30601e-05	5.87278e-05
PP_1561		putative Phage holin	23.7781	1.1317	1.1317	0.0183169	0.0420931
PP_3821	galU	UTP-glucose-1-phosphate uridylyltransferase	5266.17	1.13095	1.13095	1.07585e-18	1.7142e-17
PP_4204	mqsA	antitoxin of the type II toxin-antitoxin MqsRA	657.847	-1.13021	1.13021	4.52967e-05	0.00018776
PP_1702	rdgC	Recombination-associated protein RdgC	788.223	1.13012	1.13012	3.35026e-10	2.72419e-09
PP_3330		putative Outer membrane ferric siderophore	30.2365	1.12985	1.12985	0.0117025	0.028421
PP_1219	tolQ	subunit of a proton-driven complex used for	367.434	1.12949	1.12949	1.17413e-08	7.9913e-08
PP_4463		Carbon-nitrogen hydrolase family protein	21.1623	1.12804	1.12804	0.00432271	0.0118093
PP_3678		conserved protein of unknown function	291.706	-1.12766	1.12766	3.27462e-08	2.09675e-07
PP_1756		conserved exported protein of unknown function	336.259	1.12715	1.12715	6.14634e-12	5.79226e-11
PP_0306		conserved protein of unknown function	90.9061	1.12698	1.12698	0.000107107	0.000414084
PP_1481	patD	medium chain aldehyde dehydrogenase	681.621	-1.12561	1.12561	1.33211e-05	5.98524e-05
PP_4602		Transcriptional regulator, AraC family	304.792	-1.12494	1.12494	2.29929e-05	9.95557e-05
PP_1852		putative enoyl-[acyl-carrier-protein] reductase	292.321	-1.12368	1.12368	5.34367e-08	3.3138e-07
PP_3225		D-isomer specific 2-hydroxyacid dehydrogenase	14.5513	1.12225	1.12225	0.00780088	0.0198368
PP_0483	uvrA	excinuclease (uvrABC system protein A)	1691.87	1.12049	1.12049	4.96565e-08	3.08631e-07
PP_2653		Transcriptional regulator, Cro	42.9764	-1.11867	1.11867	0.000559451	0.00186925
PP_3694		conserved protein of unknown function	1330.59	-1.11836	1.11836	3.91219e-15	4.8686e-14
PP_5539		conserved exported protein of unknown function	20.2225	1.11559	1.11559	0.00171713	0.00521286
PP_1512		conserved protein of unknown function	142.024	-1.1135	1.1135	2.00766e-07	1.17e-06
PP_3932		Diguanylate cyclase	179.511	-1.11321	1.11321	4.0863e-10	3.28872e-09
PP_2338	prpD	2-methylcitrate dehydratase	613.768	-1.11297	1.11297	8.17063e-10	6.34433e-09
PP_0133	algB	Alginate biosynthesis transcriptional regulatory	765.428	1.11254	1.11254	5.85649e-16	7.63282e-15
PP_1912	plsX	Phosphate acyltransferase	496.563	1.11126	1.11126	2.98701e-07	1.6907e-06
PP_5396		transposase	674.1	1.11116	1.11116	1.78771e-15	2.2814e-14
PP_2347		DNA-binding response regulator	126.744	1.10993	1.10993	1.7096e-07	1.00053e-06
PP_5401		conserved protein of unknown function	295.63	-1.10904	1.10904	7.62668e-12	7.13852e-11
PP_4375	fliS	flagellar chaperone, inhibits premature FliC	676.74	-1.10849	1.10849	3.8899e-11	3.44222e-10
PP_3741	mrdA-I	transpeptidase (penicillin-binding protein 2)	32.3498	1.10845	1.10845	0.00113398	0.00357236
PP_4154		putative class 3 aminotransferase	576.456	1.10801	1.10801	1.92921e-15	2.45101e-14
PP_3623	adhB	Alcohol dehydrogenase cytochrome c subunit	337.873	-1.10576	1.10576	6.71282e-08	4.13957e-07
PP_4450		Phosphoglycerate mutase family protein	101.726	-1.10415	1.10415	4.89985e-08	3.05231e-07
PP_5207	rbbA	ribosome-associated ATPase	3186.01	-1.10232	1.10232	4.02531e-15	4.99809e-14
PP_3728		Sensor histidine kinase	78.9173	1.10061	1.10061	0.000124635	0.00047617
PP_2364		conserved protein of unknown function	786.354	1.10014	1.10014	8.76525e-07	4.70524e-06
PP_0645		protein of unknown function	24.908	-1.09997	1.09997	0.0177321	0.0409538
PP_1915	acpP	acyl carrier protein	1491.83	-1.09965	1.09965	0.000245796	0.00088741
PP_3684		conserved protein of unknown function	67.4576	-1.09912	1.09912	0.00364377	0.0102126
PP_3287	fnrC	transcriptional regulator with 4Fe-4S cluster;	521.346	-1.09815	1.09815	5.7745e-08	3.57167e-07
PP_4967	metK	methionine adenosyltransferase	5387.43	-1.09755	1.09755	1.22603e-10	1.03035e-09
PP_1021	hexR	DNA-binding transcriptional regulator	218.253	-1.0956	1.0956	3.18511e-07	1.79179e-06
PP_1826		Hydrolase, isochorismatase family	442.438	1.09551	1.09551	4.07978e-11	3.60446e-10
PP_4636	yqeF	acetyl-CoA acetyltransferase	62.7914	1.09493	1.09493	0.000213705	0.000783869
PP_3076		putative ABC transporter permease protein	63.652	-1.09329	1.09329	1.79695e-05	7.89371e-05
PP_2463	cspA-II	nucleic acid cold-shock chaperone	354.176	-1.09013	1.09013	0.000703762	0.00230943
PP_1388		Drug resistance transporter, EmrB	30.6095	1.08919	1.08919	0.00129906	0.00404389
PP_2814		conserved protein of unknown function	39.5811	1.08864	1.08864	0.000883983	0.00284661
PP_1025	leuA	2-isopropylmalate synthase	6112.6	1.08852	1.08852	2.62351e-08	1.71571e-07
PP_4428		Amino acid ABC transporter, periplasmic amino	226.414	1.08791	1.08791	6.03992e-06	2.85086e-05
PP_0875		conserved protein of unknown function	19.1879	1.08742	1.08742	0.0138133	0.0328953
PP_1576		putative Immunity protein	239.966	-1.08658	1.08658	5.88907e-05	0.000238899
PP_0217	desA	delta-9 fatty acid desaturase	358.9	1.08632	1.08632	4.32339e-15	5.35615e-14
PP_2041		Transcriptional regulator, LysR family	141.551	-1.08504	1.08504	2.30064e-05	9.95557e-05
PP_3313		putative Heat shock protein	42.2844	-1.08492	1.08492	0.00838003	0.0211534
PP_4435		conserved protein of unknown function	67.918	-1.08468	1.08468	0.00135639	0.00420809
PP_2772		putative Monooxygenase	53.3699	1.08368	1.08368	0.00106209	0.00336319
PP_2156	lolE	Lipoprotein releasing system, permease protein	280.383	1.08335	1.08335	1.90058e-08	1.25634e-07
PP_1741	betX	choline	195.98	1.08112	1.08112	1.38631e-09	1.04408e-08
PP_5372		Aldehyde dehydrogenase	108.446	-1.07987	1.07987	3.95619e-06	1.92502e-05
PP_4981	yceI	polyisoprene-binding protein, acidic stress	2679.07	-1.07982	1.07982	1.29841e-05	5.84815e-05
PP_1199		toxin-antitoxin system, higB toxin like	269.845	-1.07967	1.07967	3.5582e-07	1.9976e-06
PP_1011	glk	glucokinase	1455.53	1.079	1.079	1.36741e-09	1.03268e-08
PP_1104		AotO-related protein	483.77	-1.07647	1.07647	5.48776e-07	3.01936e-06
PP_4671		conserved exported protein of unknown function	93.448	-1.07593	1.07593	0.00511604	0.0137049
PP_2511		conserved protein of unknown function	267.718	-1.07549	1.07549	8.4011e-07	4.53183e-06
PP_5721		conserved protein of unknown function	28.4384	-1.07368	1.07368	0.00429884	0.0117714
PP_5085	maeB	malic enzyme B	8515.32	1.07339	1.07339	8.18487e-08	4.99703e-07
PP_4806	mrdB	murein transpeptidase factor	84.8221	1.07058	1.07058	3.86395e-05	0.000161716
PP_1068	gltL	glutamate	1138.71	-1.06831	1.06831	0.00049221	0.00165865
PP_5305		Epimerase	282.22	-1.06784	1.06784	5.5133e-05	0.00022498
PP_2782		Pyridoxalphosphate dependent aminotransferase,	32.9565	-1.06767	1.06767	0.00246859	0.00720834
PP_4958	ygjP	putative metal-dependent hydrolase	171.115	-1.06706	1.06706	1.23e-07	7.31498e-07
PP_4535		conserved protein of unknown function	1442	-1.06615	1.06615	1.1709e-12	1.161e-11
PP_1815	pyrF	Orotidine 5'-phosphate decarboxylase	216.202	1.06492	1.06492	2.87432e-05	0.000122364
PP_4175	fabB	3-oxoacyl-[acyl-carrier-protein] synthase 1	5588.04	1.06403	1.06403	3.29118e-27	8.21008e-26
PP_4030		Enoyl-CoA hydratase	347.888	1.06395	1.06395	6.25449e-12	5.8741e-11
PP_1307		AsnC family transcriptional regulator	20.3482	-1.06334	1.06334	0.0141778	0.0335749
PP_4963	pgk	Phosphoglycerate kinase	2006.51	1.06303	1.06303	2.0775e-20	3.74289e-19
PP_4331		conserved protein of unknown function	166.027	-1.06297	1.06297	3.81808e-05	0.000160069
PP_0557	acoR	Acetoin catabolism regulatory protein	123.997	1.06287	1.06287	0.00152214	0.00467412
PP_2445		conserved membrane protein of unknown function	52.6043	1.06084	1.06084	1.40962e-05	6.30659e-05
PP_5031	proY	proline (histidine) APC transporter	32.2456	1.06051	1.06051	0.00128766	0.00401519
PP_0265	rmlC	dTDP-4-dehydrorhamnose 3,5-epimerase	337.144	-1.0602	1.0602	2.25505e-07	1.29907e-06
PP_4377		putative Flagellin FlaG	860.068	-1.05998	1.05998	5.58604e-07	3.07037e-06
PP_1075	glpK	glycerol kinase	543.173	1.05986	1.05986	4.83133e-16	6.34169e-15
PP_2500		conserved protein of unknown function	44.2285	-1.05905	1.05905	0.0195701	0.0445458
PP_3371		Sensor histidine kinase	30.7495	1.05899	1.05899	0.000747908	0.00243545
PP_2096	rlmKL	fused 23S rRNA m2G2445 methyltransferase and 23S	1285.42	-1.05634	1.05634	2.90012e-09	2.11207e-08
PP_1377	pcaF-I	beta-ketoadipyl-CoA thiolase	126.125	1.0539	1.0539	5.49558e-05	0.000224423
PP_2265	folD-II	methylenetetrahydrofolate	756.397	1.05352	1.05352	5.52704e-13	5.66367e-12
PP_3153		conserved exported protein of unknown function	16.655	1.0532	1.0532	0.0137769	0.0328229
PP_3324	folEB	GTP cyclohydrolase I	15.8683	1.05308	1.05308	0.00884251	0.0221485
PP_3823		Cytochrome c-type protein	413.342	1.05233	1.05233	0.000270893	0.000968505
PP_2332		conserved exported protein of unknown function	80.38	1.05163	1.05163	0.000122648	0.000469553
PP_0646		conserved protein of unknown function	107.314	-1.05122	1.05122	1.21639e-06	6.41716e-06
PP_5113		predicted Zn-dependent peptidases	429.494	1.05053	1.05053	4.46044e-10	3.57939e-09
PP_4430		putative threonine dehydratase	38.5514	1.05042	1.05042	0.000334108	0.00117172
PP_4658		putative methyl-accepting chemotaxis protein	403.452	-1.05012	1.05012	8.29746e-11	7.11413e-10
PP_0705		DNA-3-methyladenine glycosylase	128.922	-1.04962	1.04962	3.61433e-07	2.02704e-06
PP_4355	fliP	flagellar export apparatus subunit	91.5994	-1.0486	1.0486	2.16367e-05	9.40721e-05
PP_1791		putative Aldolase	5172.53	-1.04395	1.04395	5.37621e-09	3.79501e-08
PP_2849	ureG	urease accessory protein	28.7874	-1.04351	1.04351	0.0130386	0.0312937
PP_5643		conserved protein of unknown function	1548.21	-1.04349	1.04349	5.846e-06	2.76169e-05
PP_2203		conserved protein of unknown function	137.994	-1.04342	1.04342	0.00464658	0.0126066
PP_0494	selB	selenocysteyl-tRNA-specific translation	576.425	-1.04248	1.04248	4.1803e-09	2.97368e-08
PP_3143		Transcriptional regulator, LysR family	57.0576	1.04202	1.04202	0.000167097	0.000624969
PP_3188		conserved protein of unknown function	67.552	-1.04112	1.04112	0.000102055	0.000396776
PP_5431		conserved protein of unknown function	215.987	-1.0409	1.0409	5.8146e-09	4.09922e-08
PP_4533	mscMB	mechanosensitive channel of miniconductance	299.543	1.04064	1.04064	7.61389e-14	8.37832e-13
PP_3426	mexF	Multidrug efflux RND transporter MexF	93.5199	-1.04	1.04	4.57117e-05	0.000189338
PP_4833		SURF1 domain protein	53.9966	-1.03975	1.03975	0.00270444	0.00783477
PP_3579		conserved membrane protein of unknown function	41.6232	-1.03944	1.03944	0.00187867	0.00564421
PP_3676		conserved protein of unknown function	764.75	-1.03761	1.03761	1.09296e-09	8.34553e-09
PP_5376		conserved exported protein of unknown function	14.9474	1.03744	1.03744	0.0187003	0.0427956
PP_3435		conserved protein of unknown function	235.736	-1.03609	1.03609	1.14222e-09	8.68563e-09
PP_0727		conserved protein of unknown function	48.4302	-1.03565	1.03565	0.000205493	0.000756265
PP_0091		putative lipoprotein	118.665	-1.03341	1.03341	0.00571457	0.0151072
PP_4629		Sensory box protein	61.3685	-1.03261	1.03261	0.000893054	0.00286745
PP_1956		conserved exported protein of unknown function	59.981	1.03128	1.03128	0.000237657	0.000860843
PP_0729		conserved protein of unknown function	141.823	-1.03107	1.03107	7.1491e-07	3.89457e-06
PP_2105		conserved protein of unknown function	133.47	-1.03066	1.03066	0.00200562	0.00597673
PP_0677		putative Lipoprotein	24.8676	-1.02957	1.02957	0.0111524	0.027229
PP_5000	hslV	peptidase component of the ATP-dependent HslVU	540.093	1.02874	1.02874	9.83649e-08	5.94612e-07
PP_5266		putative acetyl-CoA hydrolase family protein	94.8811	1.02846	1.02846	1.3005e-05	5.85277e-05
PP_5010		conserved protein of unknown function	111.063	-1.02605	1.02605	0.00856392	0.0215781
PP_1445	oprB-II	carbohydrate-selective porin	233.026	-1.02541	1.02541	1.19312e-10	1.00422e-09
PP_1722		ABC transporter, ATP-binding protein	184.546	-1.02458	1.02458	1.72032e-05	7.56914e-05
PP_2769		putative Branched-chain amino acid ABC	79.5474	-1.02436	1.02436	0.00257733	0.00750201
PP_0046	opdT-I	tyrosine-specific outer membrane porin D	38.7922	1.02376	1.02376	0.00114342	0.00359594
PP_1444	gcd	quinoprotein glucose dehydrogenase	1710.76	-1.02366	1.02366	0.000134351	0.000510985
PP_5576		conserved protein of unknown function	6005.3	-1.02333	1.02333	7.54678e-05	0.000299535
PP_4332		Chemotaxis protein CheW	821.883	-1.02315	1.02315	1.95254e-17	2.83272e-16
PP_3939	nicP-II	porin-like protein	60.04	-1.02135	1.02135	0.000378666	0.00131377
PP_5355		putative Sodium	206.226	1.02075	1.02075	7.23467e-07	3.93341e-06
PP_1272		putative Multidrug efflux MFS membrane fusion	36.2599	-1.0199	1.0199	0.0057194	0.0151072
PP_0830		Acetyltransferase, GNAT family	33.7811	-1.01956	1.01956	0.0172831	0.0400848
PP_3958	nhaA-II	Na(+)	768.731	1.01944	1.01944	1.28042e-07	7.59846e-07
PP_1519		putative Lipoprotein	55.3671	1.0169	1.0169	5.04114e-05	0.000207711
PP_3570	oprB-III	carbohydrate-selective porin	90.1592	-1.01625	1.01625	5.57194e-05	0.000227037
PP_2903	ppiB	peptidyl-prolyl cis-trans isomerase B (rotamase	1633.01	1.01622	1.01622	8.31634e-10	6.44838e-09
PP_3830	modC	Molybdenum import ATP-binding protein ModC	50.5151	1.016	1.016	0.000226178	0.000823048
PP_0357		ACT domain protein	170.938	-1.01582	1.01582	5.06955e-05	0.000208571
PP_4381	flgK	Flagellar hook-associated protein FlgK	1780.07	-1.01557	1.01557	4.18649e-06	2.02319e-05
PP_5094		putative enzyme with PLP binding domain	239.779	1.01541	1.01541	4.28251e-08	2.68595e-07
PP_0420	pabA	aminodeoxychorismate synthase	335.415	1.01377	1.01377	4.22328e-11	3.72527e-10
PP_1571		conserved protein of unknown function	46.3104	1.01216	1.01216	0.0104953	0.0258421
PP_3730	aruR	Transcriptional regulatory protein AruR	83.2497	1.012	1.012	0.00094954	0.00303643
PP_2871		Class II aldolase	22.5209	1.01087	1.01087	0.00985421	0.0244273
PP_2103		conserved protein of unknown function	77.3982	-1.0108	1.0108	0.00373473	0.0104251
PP_2087	cmpX	CmpX protein	559.324	1.0096	1.0096	9.29998e-07	4.9681e-06
PP_4814		ATP-dependent protease La domain protein	361.992	-1.00921	1.00921	3.6256e-07	2.03129e-06
PP_4036	pydB	D-hydantoinase	5748.3	-1.00902	1.00902	0.000689391	0.00226767
PP_4188	sucB	2-oxoglutarate dehydrogenase	10468.2	1.00728	1.00728	6.26635e-06	2.95016e-05
PP_0576		putative Lipoprotein	222.842	-1.00707	1.00707	4.70119e-06	2.2459e-05
PP_3492		short-chain acyl-CoA dehydrogenase	395.916	1.00608	1.00608	1.00629e-05	4.60007e-05
PP_5195		putative Iron ABC transporter, permease protein	49.0648	1.00594	1.00594	0.00148908	0.00458364
PP_3810		conserved protein of unknown function	37.1071	-1.00553	1.00553	0.005833	0.0153569
PP_2978		conserved protein of unknown function	34.0724	-1.00473	1.00473	0.0031943	0.00908209
PP_3600	gudP	glucarate transporter	19.5571	1.00319	1.00319	0.0207699	0.0468476
PP_5618		putative Cro	361.518	-1.00237	1.00237	3.88657e-05	0.000162446
PP_2104		conserved membrane protein of unknown function	102.457	-1.00196	1.00196	0.000145604	0.000550608
PP_2768		putative Branched-chain amino acid ABC	102.487	-1.00138	1.00138	0.000739422	0.00240924
PP_3345	nikD	nickel ABC transporter ATP-binding subunit	55.0094	1.00137	1.00137	2.83347e-05	0.000120905
PP_0789	ampD	N-acetyl-anhydromuramyl-L-alanine-amidase	202.552	1.0008	1.0008	9.82168e-06	4.49725e-05
PP_2995		putative DNA topology modulation kinase FlaR	43.3189	-1.00035	1.00035	0.00217087	0.00642059
